# Supplementary material for: Regulatory RNA binding proteins contribute to the transcriptome-wide splicing alterations in human cellular senescence
Source: Aging (Albany NY). 2018 Jun 24;10(6):1489–505. doi: 10.18632/aging.101485 (PMC6046225; doi:10.18632/aging.101485)
Supplement: Supplementary Tables [file aging-10-101485-s002.xlsx]

## Sheet: Table S1 - Collected Datasets
#dataset list, ten datasets from GEO database were used in our study.
#senescence datasets
AccessionNumber	SRP_Number	Lib	SampleSize	ReadsLength	ReadsDepth	Strain	LibraryType	Remarks	SenescenceTesting	InductionMethod
GSE42212	SRP017142	IGBMC (CNRS/INSERM/UDS)	3*2	54	32251234	WI38	single		Fold Change of selected genes, immunostaining of PML, H3K9me3, SAHF	RAS
GSE58910	SRP043644	Universiry of Pennsylvania	2*2	50	11915028	human astrocytes	single		EdU incorporation, Cell Cyle Analysis, Fold Change of selected genes	Oxidative
GSE63577	SRP050179	Leibniz Institute for Age Research - Fritz Lipmann Institute	3*2*4	50	41400582	BJ,HFF, IMR90,WI38	single	Not with MRC growing data	Growth Curve and beta-gal of HFF and MRC5	Replicative
GSE74324	SRP065206	Cold Spring Harbor Lab	3*2	50	10952890	IMR90	pair	Only DMSO treated samples left	SA-beta-gal assarys in cells, BrdUrd incorporation, colony formation	RAS
GSE72407	SRP062872	Cancer Research UK Cambridge Institute	24(8*3)	50	7611016	IMR90	pair		BrdU, beta-gal>40%,SAHF	RAS, Etoposide
GSE72404	SRP062871	Cancer Research UK Cambridge Institute	24(6*4)	40	18224414	IMR90	single		BrdU, beta-gal>40%,SAHF	RAS
GSE56293	SRP040745	Saint Louis University School of Medicine	2*2	50	31584910	BJ	single		SA-bgal (>60%),KI67,p16	Replicative
GSE61130	SRP046254	MRC London Institute of Medical Sciences	3*2	100	58430134	IMR90	paired,Strand		SASP, BrdU,SA-beta-gal (>70%)	RAS
GSE64553	SRP051599	Leibniz Institute for Age Research - Fritz Lipmann Institute	3*3(HFF)	50	27447488	HFF	single		SA-bgal (HFF >60%, MRC5 ~20%), growth curve	Replicative
GSE53356	SRP034541	University of Glasgow, Beatson Institute for Cancer Research	2*2	36	46751313	IMR90	paired		SA-bgal (~50%), PML and cyclin A staining	Replicative
#quiescence datasets
AccessionNumber	SRP_Number	Lib	SampleSize	ReadsLength	ReadsDepth	Strain	LibraryType	Induction Methods
GSE74324	SRP065206	Cold Spring Harbor Lab	3*2	50	10952890	IMR90	paired	serum depletion
GSE42509	SRP017378	Tel Aviv University	2*2	50	27075925	BJ	paired	serum depletion

## Sheet: Table S2 - down-regulated genes
#official gene symbols of down-regulated genes
ABCB10
ACAA2
ACAT2
ACRV1
ACTA2-AS1
ACTL6A
ACTN4
ADAMTS15
ADCY3
ADGRG6
ADSL
AGK
AKAP5
AKAP7
ALDH7A1
ALG10
ALG10B
ALMS1
ALYREF
AMOT
AMOTL1
AMOTL2
AMPH
ANKRD18B
ANKRD28
ANKRD50
ANLN
ANP32A
ANP32E
ANXA11
AP4S1
APCDD1
API5
APOBEC3B
AQR
ARHGAP10
ARHGAP11A
ARHGAP11B
ARHGAP19
ARHGAP20
ARHGAP32
ARHGAP33
ARHGEF17
ARHGEF39
ARID5B
ARL6IP6
ARL9
ARPIN
ASAP1
ASF1B
ASH2L
ASPM
ASXL1
ATAD2
ATAD5
ATG3
ATOH8
ATP11C
ATP23
ATP8B3
AUNIP
AURKA
AURKB
AXL
AZIN1
B3GALT2
BACE1
BAHCC1
BARD1
BCAM
BCKDHB
BCL2
BIRC5
BLM
BLMH
BNC2
BORA
BRCA1
BRCA2
BRIP1
BUB1
BUB1B
BUB3
BUD13
C12orf4
C14orf93
C15orf41
C16orf58
C16orf59
C17orf53
C17orf75
C17orf80
C18orf54
C19orf48
C1QTNF2
C1R
C1orf106
C1orf112
C21orf58
C2CD5
C2orf48
C3orf14
C3orf70
C4orf33
C4orf46
C5
C5orf34
C7orf31
C7orf69
C8orf88
CABLES2
CACYBP
CALM3
CALML4
CALR
CAND2
CARMN
CASP2
CASP6
CASP8AP2
CBR3
CBX2
CBX5
CC2D2A
CCDC138
CCDC150
CCDC152
CCDC18
CCDC34
CCDC8
CCHCR1
CCNA2
CCNB1
CCNB2
CCNE2
CCNF
CDC20
CDC23
CDC25A
CDC25B
CDC25C
CDC42EP4
CDC45
CDC6
CDC7
CDCA2
CDCA3
CDCA5
CDCA7
CDCA7L
CDCA8
CDH11
CDH24
CDH4
CDK1
CDK15
CDKAL1
CDKL1
CDKL5
CDKN2C
CDKN3
CDR2
CDT1
CENPA
CENPE
CENPF
CENPH
CENPI
CENPJ
CENPK
CENPL
CENPM
CENPN
CENPO
CENPP
CENPQ
CENPU
CENPW
CEP128
CEP152
CEP162
CEP192
CEP41
CEP55
CEP57
CEP70
CEP78
CEP89
CFL2
CHAF1A
CHAF1B
CHD3
CHEK1
CHML
CHTF18
CIT
CKAP2
CKAP2L
CKAP5
CKS1B
CKS2
CLDN11
CLEC14A
CLSPN
CNKSR3
CNN2
CNOT7
CNTLN
CNTRL
COL14A1
COL16A1
COMMD4
COPS3
COQ3
CORO1A
COX20
CPS1
CPSF6
CPSF7
CPXM1
CREB1
CREB3L1
CREBBP
CRISPLD2
CRTC3
CSDC2
CSE1L
CSRP2
CSTF2T
CTDSP2
CTDSPL2
CTNNAL1
CUEDC1
CUL4A
CWF19L1
CYB5RL
DAB1
DARS2
DBF4
DBF4B
DCHS1
DCK
DCLRE1A
DCLRE1B
DCN
DDAH2
DDIAS
DDX11
DDX12P
DDX19B
DDX46
DEK
DEPDC1
DEPDC1B
DERA
DGCR8
DHFR
DHX15
DHX35
DHX9
DIAPH3
DLEU2
DLG3
DLGAP5
DMC1
DNA2
DNAJC22
DNAJC9
DNMT1
DNMT3B
DOCK1
DOK5
DONSON
DRD1
DROSHA
DSCC1
DSN1
DTL
DTYMK
DUT
DYNC1I2
DZIP1L
DZIP3
E2F1
E2F2
E2F8
ECHDC3
ECT2
EEF2K
EEPD1
EFCAB7
EFNB3
EFS
EHMT2
EIF4G2
ELF4
ELN
ELOVL2
ELP4
EME1
EML4
ENAH
ENPEP
ENY2
EPB41L2
EPHB4
EPS8
ERAP1
ERCC6L
ERI2
ERLIN1
ESCO2
ESPL1
ETAA1
EWSR1
EXO1
EXOSC10
EXOSC8
EXOSC9
EZH2
EZR
FAAP24
FAF1
FAM111A
FAM111B
FAM126A
FAM127C
FAM161A
FAM162B
FAM192A
FAM46B
FAM64A
FAM72B
FAM83D
FANCA
FANCB
FANCC
FANCD2
FANCE
FANCG
FANCI
FANCL
FBL
FBN2
FBXO4
FBXO43
FBXO5
FBXW8
FECH
FEN1
FERMT2
FES
FGD5-AS1
FH
FHL3
FIGN
FIGNL1
FKBP3
FKBP5
FLNA
FLOT1
FOSL2
FOXD2
FOXD2-AS1
FOXJ2
FOXM1
FST
FUBP1
FZD2
FZD7
G2E3
GAL3ST4
GANAB
GAS2L3
GEMIN2
GEN1
GINS1
GINS2
GINS3
GINS4
GIPC3
GLI1
GLI2
GLIPR2
GLUL
GMNN
GNAI3
GNB4
GOLM1
GPC2
GPC6
GPD2
GPR137C
GPR161
GPR85
GPSM2
GRIA4
GSG2
GTF2I
GTSE1
GUCY1B3
GUSB
H2AFV
H2AFX
H2AFY2
H2AFZ
H3F3B
HAAO
HAUS1
HAUS2
HAUS4
HAUS5
HAUS8
HDAC1
HEATR6
HELLS
HEPH
HHIP
HHIP-AS1
HIRIP3
HJURP
HMCN1
HMGB1
HMGB2
HMGB3
HMGN2
HMGXB4
HMMR
HMSD
HNRNPA1
HNRNPA1L2
HNRNPA1P33
HNRNPA2B1
HNRNPD
HNRNPDL
HNRNPF
HNRNPH1
HNRNPH3
HNRNPK
HNRNPL
HNRNPM
HNRNPR
HNRNPU
HNRNPUL1
HP1BP3
HPDL
HPF1
HRCT1
HS6ST1
HSD17B11
HSD17B6
HSF2
HSPA2
HTR1B
HUNK
HYLS1
ICE1
ICK
ID2
ID4
IDH2
IFT122
IGF2BP2
IGFLR1
ILF2
ILF3
ILK
IMMP1L
IMPA2
INCENP
ING3
INTS7
IPO11
IPO8
IPO9
IQCB1
IQGAP3
IRAK1BP1
IRAK4
IRGM
IRS1
ITGB3BP
ITGBL1
ITPRIPL1
ITSN1
JADE1
JRK
KANK1
KAT7
KAZALD1
KCNJ8
KCNK2
KCTD3
KCTD6
KDELC2
KDM1A
KDM2B
KDM4D
KHDRBS1
KIAA0355
KIAA1456
KIAA1524
KIAA1755
KIAA1841
KIF11
KIF14
KIF15
KIF17
KIF18A
KIF18B
KIF20A
KIF20B
KIF22
KIF23
KIF24
KIF2A
KIF2C
KIF4A
KIF4B
KIFC1
KLF12
KLHL13
KMT2E
KNL1
KNSTRN
KNTC1
KPNB1
KRAS
LANCL1
LASP1
LBR
LCTL
LDB3
LIG1
LIG3
LIN54
LIN7A
LIN9
LINC00707
LINC00842
LINC01415
LIPE
LMNA
LMNB1
LMNB2
LOC100128361
LOC100129034
LOC100132077
LOC100288637
LOC100507642
LOC100652768
LOC145694
LOC399975
LOC642846
LOC643733
LOC730101
LOC81691
LOXL1
LRIG3
LRR1
LRRC40
LRRCC1
LSM3
LSM5
LSM8
MAB21L2
MAD2L1
MAGI3
MAGOHB
MAP2K4
MAP4K5
MARCKS
MASTL
MAT2A
MATN2
MATN3
MBOAT2
MCM10
MCM2
MCM3
MCM4
MCM5
MCM6
MCM7
MCM8
MCMBP
MCU
MCUB
MDC1
MDK
MED12
MED13L
MED14
MED20
MED22
MEIS1
MEIS2
MELK
METAP1
METAP1D
METTL10
METTL18
MGC12916
MICAL1
MIOS
MIR145
MIR17HG
MIR924HG
MIS18A
MIS18BP1
MKI67
MKS1
MLH1
MMS22L
MN1
MND1
MNS1
MOV10
MPDZ
MPHOSPH9
MRE11
MRPL1
MRPL11
MRPL13
MRPL23
MRPL3
MRPL48
MRPL9
MRPS9
MSH2
MSH6
MSRB3
MTA2
MTBP
MTCL1
MTFR2
MTHFD1
MTHFD1L
MTMR2
MUT
MXD3
MXRA8
MYB
MYBL2
MYH10
MYH9
MYL6
MYO19
MYOCD
MYOF
NAGA
NASP
NCAPD2
NCAPD3
NCAPG
NCAPG2
NCAPH
NCAPH2
NCBP1
NCBP3
NCOA2
NCOR1
NDC1
NDC80
NDE1
NDUFA9
NEIL3
NEK2
NEK3
NEMP1
NEURL1B
NFIX
NFYB
NHSL1
NID1
NID2
NIPSNAP1
NLN
NMI
NNT
NOD1
NPAS4
NPR3
NR2C2
NR2C2AP
NR2F1
NRAS
NRM
NSD1
NSD2
NSD3
NSL1
NSMCE4A
NT5C
NUAK2
NUCKS1
NUDT1
NUDT11
NUDT13
NUDT15
NUDT21
NUF2
NUP107
NUP133
NUP153
NUP155
NUP160
NUP214
NUP37
NUP54
NUP62
NUP85
NUP88
NUSAP1
ODF2
OIP5
OLFML2A
OLFML3
ORC1
ORC6
OSBPL5
OXCT1
P4HA3
PABPC4L
PAICS
PAK3
PARP1
PARPBP
PASK
PATZ1
PAWR
PAXIP1
PAXIP1-AS2
PBK
PBRM1
PBX1
PCDHB7
PCDHGA6
PCDHGA9
PCIF1
PCLAF
PCNT
PCOLCE
PDE7A
PDE7B
PDGFRB
PDHA1
PDHB
PDLIM7
PDS5B
PELI2
PER3
PFAS
PHB2
PHF14
PHF19
PHF2
PHGDH
PHKA2
PHLPP2
PHTF2
PI4K2B
PIF1
PIK3C2B
PIP4K2A
PKDCC
PKMYT1
PKN3
PLCB1
PLEKHG2
PLK1
PLK4
PLPP3
PMF1
POC1A
POC5
POLA1
POLA2
POLD1
POLD3
POLE
POLE2
POLQ
POT1
POU6F1
PPIL2
PPIP5K2
PPP1CC
PPP1R12A
PPP2R3A
PPP4R1
PRC1
PRDM5
PRIM1
PRIM2
PRKCA
PRKCI
PRKD1
PRPS2
PRR11
PRR16
PRR3
PRRX1
PRTFDC1
PSIP1
PSMC3
PSMC3IP
PSRC1
PTBP1
PTGER2
PTGES3L
PTMA
PTN
PTP4A2
PTPRG-AS1
PTTG1
PUS7L
PWP1
PXK
PXMP2
QKI
RAB42
RABGAP1
RABL3
RACGAP1
RAD1
RAD18
RAD21
RAD51
RAD51AP1
RAD51D
RAD54B
RAD54L
RAF1
RALGPS2
RANBP1
RASL11B
RB1
RBBP4
RBBP7
RBBP8
RBFOX2
RBL1
RBM12
RBM12B
RBM14
RBM17
RBM3
RBMS3
RBMX
RBMXL1
RCC1
RDX
RFC1
RFC3
RFC4
RFC5
RFWD3
RHNO1
RHOA
RIBC2
RIF1
RIMKLB
RMI1
RMI2
RNASEH2A
RNASEH2B
RNF138
RNF216
RNF219
ROCK2
ROR2
RPA1
RPA3
RPL39L
RPSA
RRM1
RRM2
RSBN1L
RTKN2
S100A10
SACS
SAE1
SAPCD2
SART3
SBF2
SCAF8
SCARA3
SCLT1
SCMH1
SCML2
SEC14L1P1
SEC23A
SENP1
SENP7
SEPHS1
SESTD1
SET
SETD2
SETMAR
SFPQ
SFXN2
SGO1
SGO2
SH3BP4
SHCBP1
SHMT1
SHROOM3
SIX1
SKA1
SKA2
SKA3
SKP2
SLBP
SLC25A3
SLC25A40
SLC2A4RG
SLF1
SLFN11
SLFN13
SMAD3
SMAD4
SMAD9
SMARCB1
SMARCD1
SMARCE1
SMC1A
SMC2
SMC3
SMC4
SMC6
SMCHD1
SMO
SNAI2
SNORD88B
SNRPA
SNRPD1
SNRPF
SNTB2
SNX18
SNX5
SNX7
SOCS2
SOCS2-AS1
SORBS3
SPAG5
SPATS2L
SPC24
SPC25
SPIN1
SPIN4
SPTLC3
SRBD1
SRGAP1
SRR
SRSF1
SRSF10
SRSF2
SRSF3
SRSF6
SRSF7
ST6GALNAC5
STAG1
STARD4-AS1
STIL
STK33
STMN1
STX2
STXBP6
SUCLG2
SUMO2
SUMO3
SUN2
SUPT16H
SUPT20H
SUSD5
SUV39H2
SV2A
SYDE2
SYNCRIP
SYNE2
SYT15
TACC3
TADA1
TAF9B
TBC1D5
TBL1X
TCERG1
TCF12
TCF19
TCF4
TCF7L1
TDP1
TEAD1
TEAD2
TEAD3
TEAD4
TESMIN
TET1
TET2
TFDP1
TGFB1I1
TGIF2
THRAP3
TIAM2
TICRR
TIFA
TIMELESS
TIPIN
TK1
TMA16
TMEM106C
TMEM155
TMEM18
TMEM200B
TMEM30B
TMEM43
TMEM65
TMEM97
TMPO
TMPO-AS1
TMSB10
TMSB15A
TMSB15B
TNFAIP8L1
TNRC6A
TNRC6C
TNS2
TONSL
TOP2A
TOP2B
TOPBP1
TOX
TP53
TPGS2
TPM4
TPX2
TRA2B
TRAF5
TRAFD1
TRAIP
TRDMT1
TRERF1
TRIM28
TRIM44
TRIM5
TRIM59
TRIM6
TRIOBP
TRIP13
TRIP6
TRO
TROAP
TRPC3
TRPC5
TRPC6
TSEN15
TSHZ3
TSPAN2
TSPOAP1
TSPYL4
TTF2
TTI1
TTK
TTYH2
TUBA1B
TUBB
TUBGCP3
TULP3
TYMS
UBE2C
UBE2T
UBL7-AS1
UBR7
UBTF
UGDH
UHRF1
USP1
USP13
USP28
USP39
USP44
UTP20
UTRN
VANGL1
VCAN
VEZF1
VPS16
VPS52
VRK1
VSIG10
WDHD1
WDR34
WDR5
WDR62
WDR76
WDR82
WHAMMP1
WNT2
WRN
XKR5
XPO1
XRCC2
XRCC6
ZBED3
ZBTB12
ZBTB8A
ZCCHC5
ZDHHC13
ZFHX4
ZFPM2
ZGRF1
ZMYM4
ZMYND11
ZNF100
ZNF107
ZNF22
ZNF273
ZNF300
ZNF33B
ZNF362
ZNF367
ZNF445
ZNF492
ZNF496
ZNF501
ZNF507
ZNF512B
ZNF519
ZNF530
ZNF532
ZNF619
ZNF621
ZNF639
ZNF660
ZNF670
ZNF695
ZNF711
ZNF714
ZNF718
ZNF724
ZNF730
ZNF827
ZNF85
ZNF90
ZNF93
ZRANB3
ZSCAN12
ZSCAN23
ZW10
ZWILCH
ZWINT
ZYG11A

## Sheet: Table S3 - up-regulated genes
#official gene symbols of up-regulated genes
AAMP
ABCA2
ABCA3
ABCA4
ABCC10
ABCF3
ABHD15
ABHD16A
ABHD6
ABLIM2
ACAD8
ACER2
ACSL5
ACVR1B
ACYP2
ADGRE2
ADGRE5
ADIPOR1
ADPRM
ADTRP
AGPAT1
AGTRAP
AHCYL2
AKAP8L
AKIP1
AKIRIN1
AKR1B1
ALAS1
ALG2
ALK
ALKBH5
ALKBH6
ALOX15B
ALPK3
AMMECR1L
AMN1
AMPD3
ANGEL1
ANGPTL4
ANKH
ANKMY1
ANKRA2
ANKRD13D
ANKRD42
ANKRD46
AOC2
AP1AR
AP1S1
APLP1
AREG
ARFGEF3
ARFIP2
ARHGAP22
ARHGAP27
ARHGAP27P1
ARHGEF37
ARIH2
ARL6
ARL8A
ARL8B
ARMC10
ARRB1
ARRDC1
ARRDC2
ARSG
ART3
ARVCF
ASPHD1
ATG16L1
ATG2A
ATG4A
ATOX1
ATP2B1-AS1
ATP6AP1
ATP6AP2
ATP6V0A1
ATP6V0B
ATP6V0D1
ATP6V0E1
ATP6V1B2
ATP6V1C1
ATP6V1D
ATP6V1E1
ATP6V1F
ATP6V1G1
ATP6V1H
B3GNT2
B4GAT1
BAG1
BAIAP2
BAZ2A
BBC3
BBS2
BCAN
BCAP31
BCL2A1
BCL2L1
BEAN1
BEST3
BEX2
BFSP1
BHLHE41
BLCAP
BLOC1S2
BORCS5
BPGM
BRAP
BRINP2
BRK1
BRSK1
BRSK2
BSDC1
BSG
BTBD19
BTG2
BTN2A2
BTRC
C11orf96
C12orf76
C14orf79
C15orf54
C15orf57
C16orf46
C18orf8
C1orf216
C1orf43
C21orf59
C2CD2L
C2orf42
C2orf81
C3
C4orf26
C6orf1
C6orf136
C6orf203
C7orf25
C9orf16
C9orf78
CACNA1B
CACNA2D3
CACNA2D4
CALB2
CAMK2B
CAMK2N2
CAMLG
CAPN10
CARS
CARS2
CASP9
CBX4
CCDC103
CCDC130
CCDC142
CCDC183
CCDC30
CCDC69
CCDC87
CCNA1
CCND1
CCND2
CCPG1
CCR1
CD163L1
CD36
CD58
CD9
CDADC1
CDC42EP2
CDIP1
CDK20
CDKL3
CDKN1A
CDKN2B
CEP19
CERS2
CES2
CES3
CFAP206
CFAP54
CHIC2
CHMP5
CHMP7
CHPF2
CHRNA9
CIAO1
CIPC
CISD1
CITED4
CLCN2
CLCN3
CLCN7
CLEC2D
CLK3
CLN5
CLN8
CLP1
CLSTN2
CMAS
CNIH1
CNIH3
CNNM4
CNOT4
COL28A1
COMMD5
COQ10A
COQ10B
COQ9
COX14
COX17
CPEB4
CRYL1
CRYM
CSGALNACT2
CSRNP2
CST3
CTBS
CTNS
CTSA
CTSD
CTSL
CTSS
CUBN
CXCL2
CXCL3
CXCL5
CYB561A3
CYB561D1
CYB561D2
CYB5D1
CYB5D2
CYBA
CYFIP2
CYHR1
CYP19A1
CYP1A1
CYP26B1
CYP3A5
CYSTM1
DAD1
DAGLB
DCAF8
DCDC2
DCHS2
DCP1B
DCSTAMP
DCUN1D3
DDA1
DDIT3
DDRGK1
DDX24
DEDD2
DERL1
DESI1
DEXI
DGAT2
DHRS12
DHRS7
DHX32
DIRC3
DISP1
DKK2
DLG4
DLGAP1-AS1
DLGAP1-AS2
DMRTA1
DNAAF2
DNAJA3
DNAJC16
DNAJC5
DPAGT1
DPM3
DPP7
DSCR3
DUSP16
DUSP26
DUSP3
DYRK3
DZANK1
EAF1
EBI3
EDA2R
EFL1
EGFL7
EGR2
EHF
ELL
ELMOD1
ELOVL3
EMC3
EMC7
EME2
EML6
ENC1
ENGASE
ENSA
ENTPD3
ENTPD7
EPB41L1
EPOP
ERCC1
EREG
ERG
ERN1
ESRRA
ETF1
EVC
EXD3
EXOSC4
F11R
FAM102A
FAM109A
FAM118B
FAM131A
FAM134C
FAM162A
FAM174A
FAM206A
FAM210B
FAM213A
FAM214B
FAM219B
FAM222B
FAM227A
FAM227B
FAM234B
FAM78A
FANK1
FBXL14
FBXL16
FBXL20
FBXO2
FBXO22
FBXO28
FBXO31
FBXO32
FBXO33
FBXO44
FBXW11
FCGBP
FER1L6
FGF18
FICD
FKBP15
FLJ32255
FLJ42351
FLRT3
FLVCR2
FLYWCH1
FNTA
FOXQ1
FUNDC2
FXR2
FYN
GABARAPL2
GAK
GALNT18
GALNT9
GAS8
GATSL3
GBA
GCC1
GDA
GDE1
GDF15
GDNF
GDNF-AS1
GDPD1
GEMIN8
GFOD2
GFPT1
GGA1
GGT1
GID4
GLB1
GLRB
GLRX
GM2A
GNPTG
GOLGA7
GOLGA7B
GPANK1
GPER1
GPR108
GPR132
GPR137B
GPR153
GPR68
GRAMD4
GRB2
GREB1
GRINA
GRIP1
GRN
GRPEL1
GSAP
GTDC1
GTF2B
HACL1
HADHB
HAGH
HAP1
HAPLN4
HAVCR2
HCG18
HECA
HECW2
HELQ
HEPHL1
HES2
HEXB
HGSNAT
HHAT
HID1
HINFP
HIST3H2A
HK2
HKDC1
HKR1
HMGCL
HPCAL1
HS2ST1
HSD17B14
HSDL1
HSF2BP
HSPA4L
HUS1
ICAM1
ICOSLG
IDS
IDUA
IER3
IFI30
IFITM10
IFNGR2
IFT20
IGF2R
IGFBP1
IGIP
IGSF8
IL1A
IL1B
IMP3
INSIG2
IPO13
IPPK
IQSEC2
IRGQ
ISCA1
ISCU
ITGB2
ITPKC
ITPRIPL2
JAG2
JUN
JUP
KCNC3
KCNC4
KCNH6
KCNJ12
KCNJ15
KCNK3
KCNN3
KCP
KCTD11
KCTD13
KCTD4
KDSR
KIAA0319L
KIAA1191
KIAA1324
KIAA1671
KIF3B
KIF9
KIFC2
KLHL3
KRT15
KRT17
KRT79
LAMB3
LAMC2
LAP3
LAPTM5
LARP6
LCP1
LEPROTL1
LIN37
LINC-PINT
LINC00094
LINC00493
LINC00513
LINC00663
LINC00886
LINC00888
LINC01021
LINC01094
LINC01125
LINC01128
LINC01134
LINC01173
LINC01239
LMLN
LOC100507065
LOC100507144
LOC100507156
LOC100507507
LOC100996842
LOC101926941
LOC101928143
LOC101928464
LOC101929188
LOC102723769
LOC105369340
LOC148413
LOC284023
LOC374443
LOC728084
LOC728730
LOC90784
LONRF3
LRIF1
LRP10
LRPAP1
LRRC73
LUCAT1
LYPLAL1
LYPLAL1-AS1
LYRM1
LZTS3
MAD2L1BP
MAFF
MAFG
MAML3
MAN2B1
MAP1LC3B
MAP2K1
MAP3K10
MAP3K12
MAP3K9
MAP7
MAPK11
MAPK13
MAPK8IP1
MAPKAPK5-AS1
MAPKBP1
MAPRE3
2017-03-02
2017-03-09
MARS2
MAST1
MAST3
MAX
MCF2L2
MCFD2
MCL1
MCOLN1
MCRIP2
MCTP1
MEI1
METTL23
MFSD11
MFSD3
MGAT4A
MGST2
MIA2
MICA
MIEF1
MIF4GD
MINPP1
MIR3142HG
MIR34AHG
MKLN1-AS
MKNK2
MLKL
MMP12
MMP7
MOAP1
MOB2
MOCS3
MOGS
MON1A
MORN1
MORN4
MREG
MRNIP
MROH1
MRPL14
MRPL17
MRPL34
MRPL44
MRPL57
MRS2
MT1X
MTFMT
MXD1
MYH16
MYL5
MYOZ2
MZF1
MZF1-AS1
NAA30
NADK
NAMPT
NAT6
NAT8L
NCDN
NCKIPSD
NDST2
NDUFA2
NDUFA3
NDUFAF1
NECAB2
NECAB3
NECAP1
NECTIN4
NEFL
NEIL2
NEU1
NFKBIE
NFS1
NINJ1
NIPAL1
NIT1
NKAIN1
NKIRAS1
NKX3-1
NLRP3
NME3
NMNAT2
NOL3
NOMO1
NOP10
NOP14-AS1
NPRL2
NPTXR
NRBF2
NRG1
NRROS
NUDT14
NUDT19
NUDT22
NUDT5
NUMB
NUP50-AS1
OGFOD2
OGFRL1
OLAH
OSBP2
OSCP1
OSGIN2
OSTM1
OTUB2
OVGP1
OXLD1
OXSM
P2RX5
PAFAH2
PAIP2
PARD6B
PARD6G-AS1
PCAT6
PCBD1
PCBD2
PCDH12
PCGF1
PCNX1
PDCD6
PDE12
PDE2A
PDE4C
PDPK1
PECAM1
PELI1
PEX5
PFKFB2
PFKFB4
PGAP2
PGS1
PHF23
PHF24
PHKA1
PHLDB3
PI4K2A
PI4KB
PIGV
PILRA
PIM2
PLA2G4A
PLA2G4C
PLD1
PLD6
PLEKHA3
PLEKHB2
PLEKHG5
PLEKHM1
PLK3
PNKD
PNP
PNPLA3
PNPLA8
POC1B
POLR2H
POLR3E
POMGNT1
PORCN
POU2F2
PPARGC1A
PPARGC1B
PPFIA3
PPIL6
PPM1H
PPP1R12C
PPP1R16A
PPP1R3F
PPP2R5B
PPP3CC
PPT2
PQLC2
PRDM1
PRDX2
PRKCH
PRLR
PROCR
PROSER2
PSAP
PSD
PSEN1
PSEN2
PSENEN
PSMD8
PSMG3-AS1
PTCHD4
PTDSS2
PTGS2
PTPMT1
PTPN22
PTPRR
PTPRU
PTRH2
PWWP2B
QPCT
QPCTL
RAB22A
RAB24
RAB27B
RAB36
RAB40B
RAB6B
RAB9A
RABGGTA
RABIF
RALA
RALGDS
RAP1GAP
RASD1
RASSF3
RASSF8-AS1
RBM18
RBM26-AS1
RCSD1
RDH16
REEP6
RENBP
REPS1
REPS2
RER1
RET
RETSAT
RGL2
RGS3
RHBDD1
RHBDD2
RHBDF1
RHBDF2
RHCG
RILP
RIOK3
RITA1
RMND5A
RNASET2
RNF11
RNF113A
RNF135
RNF14
RNF144B
RNF149
RNF167
RNF19B
RNF215
RNF25
RNF4
RNF44
RNMT
ROPN1L
ROS1
RPLP0P2
RPP25L
RPP38
RPRD1A
RPS6KL1
RRAD
RRM2B
RSPH3
RUFY1
RUNDC1
RUNDC3A-AS1
RWDD2A
RYR1
SAA1
SAMD8
SAP18
SAT1
SAXO2
SCAMP3
SCARB1
SCARF1
SCG5
SCN3B
SDF2
SDF4
SDHAF2
SEC11C
SEC14L4
SELENOT
SERINC3
SERP2
SERPINA1
SERPIND1
SERPINI1
SESN2
SETD3
SEZ6L2
SFXN4
SGCG
SH2B3
SH2D2A
SH3KBP1
SHBG
SHC1
SHC2
SHROOM1
SIAE
SLAMF8
SLC10A3
SLC11A2
SLC15A4
SLC16A6
SLC17A5
SLC19A2
SLC20A1
SLC22A15
SLC22A4
SLC25A19
SLC25A20
SLC25A28
SLC25A37
SLC25A44
SLC25A45
SLC26A2
SLC26A8
SLC2A11
SLC2A13
SLC2A6
SLC2A8
SLC31A1
SLC31A2
SLC33A1
SLC35E1
SLC35E3
SLC35E4
SLC35F5
SLC36A1
SLC4A11
SLC6A13
SLC6A4
SLC6A8
SLC7A7
SLC8A3
SLC9A1
SLC9A7
SLC9B2
SLCO4A1
SMCR8
SMG5
SMG8
SMIM3
SMIM4
SNAP29
SNCA
SNIP1
SNPH
SNX9
SOD2
SP100
SPATA18
SPG7
SPINT1
SPIRE1
SPR
SPRED3
SPRN
SPRY2
SPRYD3
SPX
SQSTM1
SRA1
SRD5A3
SRP14-AS1
SRPX2
SRXN1
ST6GALNAC4
ST7L
ST8SIA5
STARD3
STC1
STK32C
STK4
STN1
STX3
STXBP1
STXBP5-AS1
SUGCT
SULT1C2
SUPV3L1
SUSD6
SVIP
SWI5
SYNGR2
SYP
SYS1
SYT5
SYT7
TADA2B
TAF12
TAF13
TAF4B
TAF7
TAOK2
TAP1
TBC1D10A
TBC1D24
TCFL5
TDRKH
TENM1
TERF2IP
TEX264
TG
THAP1
THAP2
THAP6
THBD
THNSL1
THTPA
TIGAR
TIGD6
TIMM10B
TIMMDC1
TIPARP
TK2
TM7SF2
TM9SF1
TMBIM1
TMBIM6
TMCC1
TMED4
TMEM115
TMEM120A
TMEM127
TMEM136
TMEM150A
TMEM151A
TMEM151B
TMEM170A
TMEM179B
TMEM186
TMEM187
TMEM206
TMEM217
TMEM231
TMEM254-AS1
TMEM255B
TMEM259
TMEM33
TMEM35B
TMEM38B
TMEM41A
TMEM50A
TMEM53
TMEM55B
TMEM63B
TMEM68
TMEM86A
TMEM9B
TMX2
TMX4
TNFRSF10A
TNFRSF10B
TNFRSF10C
TNFRSF10D
TNFSF15
TNIP1
TOLLIP
TOM1
TOR1A
TOR1B
TP53RK
TPCN1
TPD52L2
TPRG1L
TRAF3IP2
TRAK2
TRAPPC3
TRIAP1
TRIB1
TRIM36
TRIM39
TRIM41
TRIM8
TRIM9
TRMT2A
TRPM8
TRPT1
TSC22D1
TSEN34
TSG101
TSGA10
TSNAX
TSPAN13
TSPYL2
TST
TSTD3
TTC39A
TTC9
TUSC2
TUT1
TXLNB
TXNDC12
TYSND1
UBAP1
UBE2E1
UBE2Q1
UBE2W
UBTD1
UCHL3
ULK3
UNC119
UNC13D
UPP1
UQCC1
USF1
USP12
USP20
UVRAG
VEGFA
VEPH1
VNN1
VPS18
WBP1L
WBP2
WDR37
WDR45
WDR73
WDR78
WDR83
WIPI1
WIPI2
WNT9A
WTAPP1
XDH
XYLT2
YIPF3
YIPF6
YPEL2
YPEL5
ZBED5-AS1
ZBTB40
ZBTB43
ZBTB48
ZBTB7B
ZC3H12A
ZCCHC17
ZCCHC6
ZCCHC7
ZDHHC14
ZDHHC24
ZDHHC5
ZDHHC9
ZFHX2
ZFYVE1
ZFYVE27
ZFYVE28
ZMIZ1-AS1
ZNF143
ZNF211
ZNF263
ZNF317
ZNF320
ZNF329
ZNF365
ZNF394
ZNF425
ZNF432
ZNF438
ZNF440
ZNF468
ZNF524
ZNF542P
ZNF550
ZNF576
ZNF582
ZNF582-AS1
ZNF589
ZNF597
ZNF610
ZNF622
ZNF667
ZNF667-AS1
ZNF691
ZNF720
ZNF773
ZNF786
ZNF814
ZNF841
ZNFX1
ZNHIT1
ZSCAN16-AS1
ZSCAN32
ZSWIM5

## Sheet: Table S4 - GO enrichment of DEs
# down-regulated genes enriched BP GOs, top 5 clustering results, each cluster showing the top three terms
Category	Term	Count	X.	PValue	Genes	List.Total	Pop.Hits	Pop.Total	Fold.Enrichment	Bonferroni	Benjamini	FDR	Clustering
GOTERM_BP_DIRECT	GO:0051301~cell division	118	11.0384	3.02729e-59	ITGB3BP, KIFC1, KNTC1, AURKA, PTTG1, CDCA8, CDCA7, HMCN1, RAD21, OIP5, MIS18A, CDCA2, NUP37, CCNA2, CDCA5, CDCA3, STAG1, LIG1, LIG3, TACC3, PPP1CC, NCAPD3, NCAPD2, DCLRE1A, MAD2L1, SGO2, TIMELESS, SGO1, SPAG5, ZWINT, MCMBP, CDCA7L, GNAI3, NEK3, NEK2, TIPIN, LRRCC1, CNTRL, RCC1, SPC24, SPC25, VRK1, TUBB, NCAPG2, FBXO5, SKA3, SKA2, SKA1, HELLS, ERCC6L, CKAP5, NUF2, CDC23, CDC20, NDC80, PMF1, FAM64A…	955	350	16792	5.92807	8.75491e-56	8.75491e-56	5.4289e-56	1
GOTERM_BP_DIRECT	GO:0007062~sister chromatid cohesion	64	5.9869	3.20974e-52	ITGB3BP, KIF22, XPO1, KNTC1, AURKB, KIF2C, NDE1, CDCA8, RAD21, DDX11, INCENP, NUP37, CDCA5, STAG1, KIF2A, ZW10, NUP133, DSN1, NUP85, PPP1CC, MRE11, MAD2L1, SGO2, SGO1, ZWINT, NSL1, MCMBP, BUB1B, NUP107, NUP160, SPC24, SPC25, CENPA, BUB1, SKA2, SKA1, ZWILCH, BUB3, ERCC6L, CENPO, CENPN, CENPM, CENPL, PDS5B, CKAP5, CENPQ, CENPP, KIF18A, NUF2, CENPF, NDC80, CENPE, CDC20, BIRC5, PMF1, CENPK, CENPI, SM…	955	103	16792	10.9255	9.28257e-49	4.64128e-49	5.75609e-49	1
GOTERM_BP_DIRECT	GO:0007067~mitotic nuclear division	92	8.60617	5.18427e-50	ITGB3BP, KIF22, BORA, KNTC1, PKMYT1, AURKA, PTTG1, AURKB, FAM83D, KIF2C, RAD21, OIP5, INCENP, MIS18A, CDCA2, NUP37, MASTL, CCNA2, CDCA5, ASPM, CDCA3, STAG1, ZW10, CDK1, CDC6, KIF11, NUP88, KIF15, CCNF, TPX2, PBK, EML4, DCLRE1A, TIMELESS, SGO1, NSL1, MCMBP, KLHL13, BUB1B, HAUS7, HAUS8, HAUS4, TRIOBP, SNX18, HAUS5, NEK3, NEK2, HAUS2, HAUS1, TIPIN, LRRCC1, ANLN, CEP55, RCC1, SPC24, SPC25, VRK1, NCAP…	955	248	16792	6.52282	1.49929e-46	4.99764e-47	9.29706e-47	1
GOTERM_BP_DIRECT	GO:0006260~DNA replication	71	6.64172	7.73645e-46	CLSPN, DBF4, MCM10, CDT1, MCM8, CDC45, MCM7, ORC6, ORC1, CDC7, CDK1, CDC6, RBBP4, DTL, LIG1, POLE, LIG3, RMI2, TOPBP1, MCM2, RBBP7, MCM3, RNASEH2A, MCM4, RMI1, MCM5, MCM6, MRE11, RAD1, RFC5, RFC3, RFC4, TIMELESS, RFC1, RRM2, RRM1, DSCC1, BLM, TICRR, TIPIN, POLA1, CHEK1, NFIX, RPA3, RPA1, SET, POLE2, RHNO1, FEN1, EXO1, GINS2, KAT7, GINS3, NASP, FAM111A, GINS4, BRIP1, WRN, CDC25C, BRCA1, CDC25A, PO…	955	155	16792	8.05426	2.23738e-42	5.59345e-43	1.38739e-42	2
GOTERM_BP_DIRECT	GO:0006281~DNA repair	66	6.17399	1.04758e-27	RAD51D, KIF22, CLSPN, XRCC2, PTTG1, FANCL, DDX11, FANCI, FANCG, FANCA, FANCC, CDK1, NUDT1, GEN1, LIG1, POLE, LIG3, TOPBP1, RAD51, MRE11, RAD1, RFC5, USP28, UHRF1, RFWD3, FANCD2, RAD18, DMC1, UBE2T, BLM, TICRR, FOXM1, SLF1, POLA1, FAAP24, CHEK1, RPA3, RPA1, POLE2, SMARCB1, ACTL6A, POLQ, FEN1, EXO1, MSH6, PDS5B, RAD51AP1, MSH2, PIF1, TRIM28, EME1, WRN, RAD54L, SMC3, BRCA1, NSMCE4A, TDP1, POLD1, PAR…	955	235	16792	4.93827	3.02959e-24	6.05919e-25	1.87864e-24	2
GOTERM_BP_DIRECT	GO:0006270~DNA replication initiation	21	1.96445	1.15276e-17	CDC7, CDC6, GINS4, POLE, SLF1, POLA1, TOPBP1, MCM2, MCM10, MCM3, MCM4, MCM5, MCM6, CCNE2, PRIM1, CDC45, MCM7, POLE2, PRIM2, ORC6, ORC1	955	32	16792	11.539	3.33379e-14	3.70421e-15	2.06727e-14	2
GOTERM_BP_DIRECT	GO:0016925~protein sumoylation	37	3.46118	1.45887e-17	BLM, NUP160, SAE1, CBX2, AURKB, NDC1, SUMO3, RPA1, CDCA8, NUP214, RAD21, HNRNPK, MDC1, INCENP, NUP37, NUP54, TOP2B, TOP2A, STAG1, NUP133, NUP153, NUP88, TRIM28, SMC6, NUP85, BIRC5, WRN, NUP155, SMC3, BRCA1, SENP1, NSMCE4A, NUP62, NUP107, SMC1A, SCMH1, PARP1	955	117	16792	5.56051	4.21906e-14	4.21906e-15	2.61623e-14	3
GOTERM_BP_DIRECT	GO:0007077~mitotic nuclear envelope disassembly	19	1.77736	8.20533e-12	PRKCA, NUP133, CDK1, NUP153, NUP160, NUP88, LMNA, NUP85, NUP155, NDC1, CCNB1, NUP214, VRK1, CCNB2, NUP62, PLK1, NUP37, NUP107, NUP54	955	44	16792	7.59277	2.37298e-08	1.39587e-09	1.47148e-08	3
GOTERM_BP_DIRECT	GO:0006406~mRNA export from nucleus	25	2.33863	1.21937e-09	ENY2, SRSF1, NCBP1, SRSF10, NUP160, NDC1, NUP214, BUD13, DDX19B, NUP37, NUP54, NUP133, NUP153, NUP88, HNRNPA2B1, ALYREF, NUP85, NUP155, SLBP, SRSF3, SRSF2, SRSF7, NUP62, SRSF6, NUP107	955	100	16792	4.39581	3.52642e-06	1.41057e-07	2.18673e-06	3
GOTERM_BP_DIRECT	GO:0036297~interstrand cross-link repair	20	1.87091	6.72885e-12	RAD51D, RAD51AP1, NUCKS1, USP1, EME1, FAAP24, RAD51, RPA3, FANCL, RPA1, DCLRE1A, DCLRE1B, FANCI, FANCD2, FANCE, FANCG, FANCA, UBE2T, FANCB, FANCC	955	49	16792	7.17684	1.94598e-08	1.21624e-09	1.2067e-08	4
GOTERM_BP_DIRECT	GO:0031297~replication fork processing	11	1.029	1.16143e-06	MMS22L, BLM, DDX11, NUCKS1, TONSL, ALYREF, SETMAR, EME1, WRN, ZRANB3, RAD51	955	27	16792	7.16354	0.00335323	8.3968e-05	0.0020828	4
GOTERM_BP_DIRECT	GO:0007131~reciprocal meiotic recombination	11	1.029	3.53804e-06	RAD51D, MSH6, RAD21, XRCC2, MSH2, MND1, RAD54B, DMC1, RAD51, TRIP13, MRE11	955	30	16792	6.44719	0.0101799	0.000237926	0.00634466	4
GOTERM_BP_DIRECT	GO:0000398~mRNA splicing, via spliceosome	40	3.74181	2.52219e-10	SRSF1, NCBP1, SRSF10, LSM8, TRA2B, SNRPD1, SYNCRIP, SART3, HNRNPL, HNRNPM, DDX46, HNRNPK, BUD13, RAVER2, HNRNPF, NUDT21, USP39, HNRNPD, LSM5, LSM3, DHX35, DHX9, ALYREF, HNRNPA2B1, PTBP1, HNRNPA1, HNRNPR, RBMX, HNRNPU, SRSF3, SRSF2, HNRNPH3, AQR, SRSF7, SRSF6, HNRNPUL1, CPSF7, SNRPA, HNRNPH1, SNRPF	955	222	16792	3.16815	7.29416e-07	3.17137e-08	4.52309e-07	5
GOTERM_BP_DIRECT	GO:0010467~gene expression	14	1.30964	1.77886e-06	NCBP1, HNRNPA2B1, PTBP1, IGF2BP2, RBMX, HNRNPR, HNRNPA1, HNRNPU, HNRNPL, HNRNPM, HNRNPK, HNRNPF, HNRNPD, HNRNPH1	955	48	16792	5.12845	0.00513125	0.000125467	0.00319001	5
GOTERM_BP_DIRECT	GO:0000380~alternative mRNA splicing, via spliceosome	7	0.654818	6.69917e-05	SRSF1, KDM1A, HNRNPM, SRSF6, SFPQ, PTBP1, RBM17	955	14	16792	8.79162	0.176133	0.00312007	0.120069	5
# up-regulated genes enriched BP GOs, top 5 clustering results, each cluster showing the top three terms
Category	Term	Count	X.	PValue	Genes	List.Total	Pop.Hits	Pop.Total	Fold.Enrichment	Bonferroni	Benjamini	FDR	Clustering
GOTERM_BP_DIRECT	GO:0015992~proton transport	17	1.57993	1.28488e-09	SLC2A13, ATP6V0E1, MFSD3, SLC33A1, ATP6AP1, ATP6V1B2, ATP6V1D, ATP6V0B, ATP6V1F, SLC2A8, ATP6V1C1, SLC2A6, SLC17A5, SLC4A11, ATP6V1E1, SLC15A4, ATP6V0D1	859	49	16792	6.78207	3.65419e-06	3.65419e-06	2.29989e-06	1
GOTERM_BP_DIRECT	GO:0033572~transferrin transport	14	1.30112	7.65533e-09	ATP6V0E1, ATP6AP1, ATP6V1H, ATP6V1B2, ATP6V1G1, ATP6V1D, ATP6V0B, ATP6V1F, SLC11A2, ATP6V1C1, ATP6V1E1, ATP6V0A1, ATP6V0D1, ATP6V0D2	859	35	16792	7.81932	2.17715e-05	1.08858e-05	1.37028e-05	1
GOTERM_BP_DIRECT	GO:0090383~phagosome acidification	12	1.11524	3.56846e-08	ATP6V1C1, ATP6V0E1, ATP6V1E1, ATP6V0A1, ATP6V1H, ATP6V1B2, ATP6V1G1, ATP6V0D1, ATP6V0D2, ATP6V1D, ATP6V0B, ATP6V1F	859	27	16792	8.68814	0.000101482	3.38284e-05	6.38741e-05	1
GOTERM_BP_DIRECT	GO:0006914~autophagy	21	1.95167	1.35395e-05	TM9SF1, GABARAPL2, VPS18, NRBF2, PLEKHM1, TOLLIP, TSG101, TMBIM6, UVRAG, PHF23, SESN2, MAP1LC3B, SQSTM1, ATG4A, ULK3, ATG2A, RAB24, CTSD, HAP1, WDR45, TIGAR	859	133	16792	3.08658	0.0377747	0.00548584	0.0242324	2
GOTERM_BP_DIRECT	GO:0000045~autophagosome assembly	9	0.836431	0.000955015	GABARAPL2, PSEN1, MAP1LC3B, ATG4A, ATG2A, KIAA1324, ATG16L1, WIPI2, WDR45	859	41	16792	4.29109	0.933951	0.176422	1.69572	2
GOTERM_BP_DIRECT	GO:0000422~mitophagy	7	0.650558	0.00796236	FUNDC2, GABARAPL2, SQSTM1, ATG4A, ATG2A, WIPI2, WDR45	859	35	16792	3.90966	1	0.717221	13.3327	2
GOTERM_BP_DIRECT	GO:0030216~keratinocyte differentiation	14	1.30112	0.000113364	MAP2K1, LCE3A, TSG101, LCE3D, LCE2C, LCE2B, LCE2A, STK4, LCE1F, SPRR2D, SPRR2A, ST14, LCE2D, IVL	859	76	16792	3.601	0.275611	0.0395019	0.202724	3
GOTERM_BP_DIRECT	GO:0031424~keratinization	10	0.929368	0.000632005	LCE3A, SPRR2D, LCE1F, SPRR2A, LCE3D, LCE2C, LCE2D, LCE2B, LCE2A, IVL	859	48	16792	4.07256	0.834369	0.150794	1.12525	3
GOTERM_BP_DIRECT	GO:0018149~peptide cross-linking	10	0.929368	0.000861772	LCE3A, SPRR2D, LCE1F, SPRR2A, LCE3D, LCE2C, LCE2D, LCE2B, LCE2A, IVL	859	50	16792	3.90966	0.913873	0.171891	1.53136	3
GOTERM_BP_DIRECT	GO:0035434~copper ion transmembrane transport	4	0.371747	0.000511516	SLC11A2, ATOX1, SLC31A2, SLC31A1	859	4	16792	19.5483	0.766629	0.135421	0.911649	4
GOTERM_BP_DIRECT	GO:0006825~copper ion transport	6	0.557621	0.000672723	SLC11A2, ATOX1, HEPHL1, SLC31A2, SLC31A1, COX17	859	15	16792	7.81932	0.852491	0.147421	1.19733	4
GOTERM_BP_DIRECT	GO:1903874~ferrous iron transmembrane transport	3	0.27881	0.0235199	SLC11A2, SLC25A37, SLC25A28	859	5	16792	11.729	1	0.91849	34.6902	4
GOTERM_BP_DIRECT	GO:0006919~activation of cysteine-type endopeptidase activity involved in apoptotic process	13	1.20818	0.00100067	TNFRSF10A, SLC11A2, XDH, RET, TNFRSF10B, BBC3, ACER2, TNFSF15, NKX3-1, FAM162A, NLRP3, PDCD6, DNAJA3	859	83	16792	3.06178	0.942001	0.172894	1.7761	5
GOTERM_BP_DIRECT	GO:0008625~extrinsic apoptotic signaling pathway via death domain receptors	7	0.650558	0.0119004	TNFRSF10A, MOAP1, TNFRSF10C, TNFRSF10B, BLOC1S2, TNFRSF10D, DEDD2	859	38	16792	3.601	1	0.787248	19.2886	5
GOTERM_BP_DIRECT	GO:0070059~intrinsic apoptotic signaling pathway in response to endoplasmic reticulum stress	6	0.557621	0.024882	TNFRSF10B, BBC3, TMBIM6, ERN1, BRSK2, DDIT3	859	33	16792	3.55424	1	0.922639	36.3017	5
# down-regulated genes enriched BP GOs, results from DAVID
Category	Term	Count	%	PValue	Genes	List Total	Pop Hits	Pop Total	Fold Enrichment	Bonferroni	Benjamini	FDR
GOTERM_BP_DIRECT	GO:0051301~cell division	118	11.0384	3.02729e-59	ITGB3BP, KIFC1, KNTC1, AURKA, PTTG1, CDCA8, CDCA7, HMCN1, RAD21, OIP5, MIS18A, CDCA2, NUP37, CCNA2, CDCA5, CDCA3, STAG1, LIG1, LIG3, TACC3, PPP1CC, NCAPD3, NCAPD2, DCLRE1A, MAD2L1, SGO2, TIMELESS, SGO1, SPAG5, ZWINT, MCMBP, CDCA7L, GNAI3, NEK3, NEK2, TIPIN, LRRCC1, CNTRL, RCC1, SPC24, SPC25, VRK1, TUBB, NCAPG2, FBXO5, SKA3, SKA2, SKA1, HELLS, ERCC6L, CKAP5, NUF2, CDC23, CDC20, NDC80, PMF1, FAM64A…	955	350	16792	5.92807	8.75491e-56	8.75491e-56	5.4289e-56
GOTERM_BP_DIRECT	GO:0007062~sister chromatid cohesion	64	5.9869	3.20974e-52	ITGB3BP, KIF22, XPO1, KNTC1, AURKB, KIF2C, NDE1, CDCA8, RAD21, DDX11, INCENP, NUP37, CDCA5, STAG1, KIF2A, ZW10, NUP133, DSN1, NUP85, PPP1CC, MRE11, MAD2L1, SGO2, SGO1, ZWINT, NSL1, MCMBP, BUB1B, NUP107, NUP160, SPC24, SPC25, CENPA, BUB1, SKA2, SKA1, ZWILCH, BUB3, ERCC6L, CENPO, CENPN, CENPM, CENPL, PDS5B, CKAP5, CENPQ, CENPP, KIF18A, NUF2, CENPF, NDC80, CENPE, CDC20, BIRC5, PMF1, CENPK, CENPI, SM…	955	103	16792	10.9255	9.28257e-49	4.64128e-49	5.75609e-49
GOTERM_BP_DIRECT	GO:0007067~mitotic nuclear division	92	8.60617	5.18427e-50	ITGB3BP, KIF22, BORA, KNTC1, PKMYT1, AURKA, PTTG1, AURKB, FAM83D, KIF2C, RAD21, OIP5, INCENP, MIS18A, CDCA2, NUP37, MASTL, CCNA2, CDCA5, ASPM, CDCA3, STAG1, ZW10, CDK1, CDC6, KIF11, NUP88, KIF15, CCNF, TPX2, PBK, EML4, DCLRE1A, TIMELESS, SGO1, NSL1, MCMBP, KLHL13, BUB1B, HAUS7, HAUS8, HAUS4, TRIOBP, SNX18, HAUS5, NEK3, NEK2, HAUS2, HAUS1, TIPIN, LRRCC1, ANLN, CEP55, RCC1, SPC24, SPC25, VRK1, NCAP…	955	248	16792	6.52282	1.49929e-46	4.99764e-47	9.29706e-47
GOTERM_BP_DIRECT	GO:0006260~DNA replication	71	6.64172	7.73645e-46	CLSPN, DBF4, MCM10, CDT1, MCM8, CDC45, MCM7, ORC6, ORC1, CDC7, CDK1, CDC6, RBBP4, DTL, LIG1, POLE, LIG3, RMI2, TOPBP1, MCM2, RBBP7, MCM3, RNASEH2A, MCM4, RMI1, MCM5, MCM6, MRE11, RAD1, RFC5, RFC3, RFC4, TIMELESS, RFC1, RRM2, RRM1, DSCC1, BLM, TICRR, TIPIN, POLA1, CHEK1, NFIX, RPA3, RPA1, SET, POLE2, RHNO1, FEN1, EXO1, GINS2, KAT7, GINS3, NASP, FAM111A, GINS4, BRIP1, WRN, CDC25C, BRCA1, CDC25A, PO…	955	155	16792	8.05426	2.23738e-42	5.59345e-43	1.38739e-42
GOTERM_BP_DIRECT	GO:0006281~DNA repair	66	6.17399	1.04758e-27	RAD51D, KIF22, CLSPN, XRCC2, PTTG1, FANCL, DDX11, FANCI, FANCG, FANCA, FANCC, CDK1, NUDT1, GEN1, LIG1, POLE, LIG3, TOPBP1, RAD51, MRE11, RAD1, RFC5, USP28, UHRF1, RFWD3, FANCD2, RAD18, DMC1, UBE2T, BLM, TICRR, FOXM1, SLF1, POLA1, FAAP24, CHEK1, RPA3, RPA1, POLE2, SMARCB1, ACTL6A, POLQ, FEN1, EXO1, MSH6, PDS5B, RAD51AP1, MSH2, PIF1, TRIM28, EME1, WRN, RAD54L, SMC3, BRCA1, NSMCE4A, TDP1, POLD1, PAR…	955	235	16792	4.93827	3.02959e-24	6.05919e-25	1.87864e-24
GOTERM_BP_DIRECT	GO:0000082~G1/S transition of mitotic cell cycle	40	3.74181	8.65106e-23	DBF4, IQGAP3, POLA1, PKMYT1, RCC1, MCM10, RPA3, CDT1, RPA1, CCNE2, PRIM1, TYMS, CDC45, MCM8, MCM7, POLE2, CDKN2C, PRIM2, FBXO5, RANBP1, ORC6, ORC1, CDCA5, CDC7, CDK1, CDC6, POLE, SKP2, RB1, MCM2, MCM3, CDKN3, MCM4, MCM5, CDC25A, MCM6, DHFR, CUL4A, RRM2, ID4	955	102	16792	6.89539	2.50189e-19	4.16981e-20	1.55141e-19
GOTERM_BP_DIRECT	GO:0000086~G2/M transition of mitotic cell cycle	45	4.20954	5.39731e-22	HAUS4, HAUS5, NEK2, HAUS2, FOXM1, BORA, CEP78, HAUS1, PKMYT1, CHEK1, AURKA, CNTRL, HMMR, TUBB, NDE1, CEP57, PPP1R12A, ODF2, MASTL, PLCB1, KHDRBS1, CDK1, CKAP5, CEP192, PCNT, CEP41, SKP2, TPX2, ALMS1, BIRC5, CDC25C, CEP152, CENPJ, CDC25A, CDC25B, CCNB1, PLK4, CCNB2, PLK1, CALM3, HAUS7, HAUS8, CIT, MELK, DYNC1I2	955	137	16792	5.77552	1.5609e-18	2.22986e-19	9.67911e-19
GOTERM_BP_DIRECT	GO:0000070~mitotic sister chromatid segregation	19	1.77736	1.05001e-17	KIFC1, NEK2, DSN1, NUSAP1, KIF18B, NDC80, ESPL1, KNSTRN, SMC4, MAD2L1, CEP57, PLK1, CENPA, SPAG5, ZWINT, NSL1, SMC1A, BUB3, ZW10	955	25	16792	13.3633	3.03662e-14	3.79578e-15	1.883e-14
GOTERM_BP_DIRECT	GO:0006270~DNA replication initiation	21	1.96445	1.15276e-17	CDC7, CDC6, GINS4, POLE, SLF1, POLA1, TOPBP1, MCM2, MCM10, MCM3, MCM4, MCM5, MCM6, CCNE2, PRIM1, CDC45, MCM7, POLE2, PRIM2, ORC6, ORC1	955	32	16792	11.539	3.33379e-14	3.70421e-15	2.06727e-14
GOTERM_BP_DIRECT	GO:0016925~protein sumoylation	37	3.46118	1.45887e-17	BLM, NUP160, SAE1, CBX2, AURKB, NDC1, SUMO3, RPA1, CDCA8, NUP214, RAD21, HNRNPK, MDC1, INCENP, NUP37, NUP54, TOP2B, TOP2A, STAG1, NUP133, NUP153, NUP88, TRIM28, SMC6, NUP85, BIRC5, WRN, NUP155, SMC3, BRCA1, SENP1, NSMCE4A, NUP62, NUP107, SMC1A, SCMH1, PARP1	955	117	16792	5.56051	4.21906e-14	4.21906e-15	2.61623e-14
GOTERM_BP_DIRECT	GO:0007059~chromosome segregation	28	2.61927	1.08844e-16	NEK3, NEK2, RCC1, SPC25, NDE1, OIP5, HJURP, INCENP, MIS18A, CDCA2, SKA3, SKA2, SKA1, TOP2A, CENPN, KIF11, DSN1, NUF2, CENPF, NDC80, CENPE, PMF1, KNSTRN, ESCO2, BRCA1, SGO1, SPAG5, CENPW	955	68	16792	7.24016	3.21076e-13	2.91989e-14	1.9984e-13
GOTERM_BP_DIRECT	GO:0000722~telomere maintenance via recombination	20	1.87091	3.00183e-16	LIG1, POLE, POLA1, BRCA2, SMC6, WRN, RAD51, RPA3, RFC5, POLD3, RPA1, PRIM1, DNA2, RFC3, RFC4, RFC1, POLE2, POLD1, PRIM2, FEN1	955	32	16792	10.9895	9.63229e-13	8.02691e-14	5.9952e-13
GOTERM_BP_DIRECT	GO:0000731~DNA synthesis involved in DNA repair	20	1.87091	3.06435e-15	EXO1, RAD51D, RAD51AP1, XRCC2, BLM, POLE, POLA1, BRCA2, BRIP1, RMI2, WRN, RMI1, BRCA1, RAD51, MRE11, POLD3, DNA2, RFC3, POLD1, BARD1	955	35	16792	10.0476	8.99014e-12	6.91558e-13	5.57332e-12
GOTERM_BP_DIRECT	GO:0000724~double-strand break repair via homologous recombination	26	2.43218	1.29336e-13	RAD51D, XRCC2, BLM, RPA3, RPA1, MCM8, H2AFX, POLQ, FEN1, MMS22L, RAD51AP1, NUCKS1, GEN1, TONSL, LIG3, BRCA2, SMC6, RAD54L, BRCA1, MRE11, RAD51, SFPQ, RNF138, RAD54B, PARP1, KDM4D	955	74	16792	6.1779	3.74054e-10	2.67182e-11	2.31948e-10
GOTERM_BP_DIRECT	GO:0034080~CENP-A containing nucleosome assembly	20	1.87091	3.95672e-13	ITGB3BP, CENPO, CENPN, CENPM, CENPL, RBBP4, CENPQ, CENPP, RBBP7, CENPK, CENPI, CENPH, OIP5, KNL1, HJURP, CENPA, MIS18A, CENPW, MIS18BP1, CENPU	955	43	16792	8.17825	1.14432e-09	7.62878e-11	7.09588e-10
GOTERM_BP_DIRECT	GO:0036297~interstrand cross-link repair	20	1.87091	6.72885e-12	RAD51D, RAD51AP1, NUCKS1, USP1, EME1, FAAP24, RAD51, RPA3, FANCL, RPA1, DCLRE1A, DCLRE1B, FANCI, FANCD2, FANCE, FANCG, FANCA, UBE2T, FANCB, FANCC	955	49	16792	7.17684	1.94598e-08	1.21624e-09	1.2067e-08
GOTERM_BP_DIRECT	GO:0007077~mitotic nuclear envelope disassembly	19	1.77736	8.20533e-12	PRKCA, NUP133, CDK1, NUP153, NUP160, NUP88, LMNA, NUP85, NUP155, NDC1, CCNB1, NUP214, VRK1, CCNB2, NUP62, PLK1, NUP37, NUP107, NUP54	955	44	16792	7.59277	2.37298e-08	1.39587e-09	1.47148e-08
GOTERM_BP_DIRECT	GO:0000732~strand displacement	15	1.40318	1.69145e-11	EXO1, RAD51D, RAD51AP1, XRCC2, BLM, BRCA2, BRIP1, RMI2, WRN, RMI1, BRCA1, RAD51, MRE11, DNA2, BARD1	955	26	16792	10.1442	4.8917e-08	2.71761e-09	3.03333e-08
GOTERM_BP_DIRECT	GO:0051726~regulation of cell cycle	30	2.80636	4.56833e-11	RAD51D, E2F2, FIGNL1, FOXM1, LIN9, PRR11, PKMYT1, MYBL2, CCNE2, NUP214, CABLES2, MASTL, PLCB1, CDK15, RBBP4, DTL, CCNF, RBL1, SKP2, CENPF, RB1, CDC25C, CDC25A, CDKL5, CCNB1, ICK, CCNB2, CDKL1, PLK1, LIN54	955	124	16792	4.25401	1.32116e-07	6.95347e-09	8.19247e-08
GOTERM_BP_DIRECT	GO:0032508~DNA duplex unwinding	18	1.68382	9.30957e-11	GINS1, GINS2, DHX9, BLM, PIF1, XRCC6, GINS4, BRIP1, WRN, MCM3, DDX12P, POT1, MCM5, MRE11, DNA2, CDC45, DDX11, RAD54B	955	44	16792	7.19315	2.69233e-07	1.34616e-08	1.6695e-07
GOTERM_BP_DIRECT	GO:0007052~mitotic spindle organization	15	1.40318	2.05579e-10	STIL, KIF11, PCNT, TTK, NDC80, AURKA, RCC1, SMC3, CCNB1, SPC25, WDR62, GPSM2, STMN1, SMC1A, KIF2A	955	30	16792	8.79162	5.94534e-07	2.83111e-08	3.68669e-07
GOTERM_BP_DIRECT	GO:1901796~regulation of signal transduction by p53 class mediator	29	2.71282	2.37069e-10	BLM, TAF9B, AURKA, CHEK1, AURKB, RPA3, RPA1, RHNO1, EXO1, RBBP4, MTA2, TPX2, BRIP1, RMI2, TOPBP1, WRN, EHMT2, RBBP7, RMI1, BRCA1, MRE11, RFC5, RAD1, DNA2, RFC3, RFC4, HDAC1, SUPT16H, BARD1	955	124	16792	4.11221	6.85604e-07	3.11638e-08	4.25141e-07
GOTERM_BP_DIRECT	GO:0000398~mRNA splicing, via spliceosome	40	3.74181	2.52219e-10	SRSF1, NCBP1, SRSF10, LSM8, TRA2B, SNRPD1, SYNCRIP, SART3, HNRNPL, HNRNPM, DDX46, HNRNPK, BUD13, RAVER2, HNRNPF, NUDT21, USP39, HNRNPD, LSM5, LSM3, DHX35, DHX9, ALYREF, HNRNPA2B1, PTBP1, HNRNPA1, HNRNPR, RBMX, HNRNPU, SRSF3, SRSF2, HNRNPH3, AQR, SRSF7, SRSF6, HNRNPUL1, CPSF7, SNRPA, HNRNPH1, SNRPF	955	222	16792	3.16815	7.29416e-07	3.17137e-08	4.52309e-07
GOTERM_BP_DIRECT	GO:0006271~DNA strand elongation involved in DNA replication	11	1.029	7.7399e-10	POLD3, GINS1, PRIM1, GINS2, RFC3, RFC4, POLD1, GINS3, GINS4, PRIM2, POLA1	955	15	16792	12.8944	2.23838e-06	9.32658e-08	1.38801e-06
GOTERM_BP_DIRECT	GO:0006406~mRNA export from nucleus	25	2.33863	1.21937e-09	ENY2, SRSF1, NCBP1, SRSF10, NUP160, NDC1, NUP214, BUD13, DDX19B, NUP37, NUP54, NUP133, NUP153, NUP88, HNRNPA2B1, ALYREF, NUP85, NUP155, SLBP, SRSF3, SRSF2, SRSF7, NUP62, SRSF6, NUP107	955	100	16792	4.39581	3.52642e-06	1.41057e-07	2.18673e-06
GOTERM_BP_DIRECT	GO:0007049~cell cycle	38	3.55472	1.71829e-09	E2F2, CKS1B, RABGAP1, GNAI3, DBF4B, LIN9, FOXM1, DTYMK, TIPIN, AURKA, AURKB, DDX12P, HMCN1, CASP8AP2, SMARCB1, HJURP, USP39, CABLES2, POC5, RBBP4, NASP, GMNN, RBL1, LIG3, CDC20, MCM2, TET2, CDKN3, ESCO2, BRCA1, SUV39H2, UHRF1, RIF1, ANXA11, CHTF18, LIN54, CHAF1A, CHAF1B	955	217	16792	3.07909	4.96927e-06	1.91126e-07	3.08144e-06
GOTERM_BP_DIRECT	GO:0008283~cell proliferation	52	4.86436	2.51909e-09	STIL, E2F8, DTYMK, AURKB, GLI2, FES, MCM10, FAM83D, KIF2C, KDM1A, MCM7, SETMAR, ILK, USP13, KHDRBS1, CDK1, KIF15, SKP2, TPX2, TACC3, RBBP7, MRE11, PRKD1, USP28, UHRF1, GLUL, SIX1, BUB1B, MELK, CKS1B, POLA1, TRAIP, TYMS, FBXW8, CSE1L, BUB1, TFDP1, PDS5B, MKI67, NASP, DLGAP5, SMAD4, RAF1, CENPF, CDC25C, CDC25A, EPS8, PLK1, CKS2, TCF19, H3F3B, MYH10	955	366	16792	2.49817	7.28519e-06	2.69823e-07	4.51754e-06
GOTERM_BP_DIRECT	GO:0006302~double-strand break repair	19	1.77736	1.6611e-08	MSH2, LIG1, EME1, LIG3, MND1, BRIP1, BRCA2, WRN, BRCA1, ESCO2, MRE11, RAD21, TDP1, H2AFX, PARP1, POLQ, CDCA5, FEN1, TRIP13	955	66	16792	5.06184	4.80378e-05	1.71567e-06	2.97888e-05
GOTERM_BP_DIRECT	GO:0000281~mitotic cytokinesis	13	1.21609	2.22884e-08	CKAP2, KIF23, SNX18, KIF4A, CENPA, PLK1, NUSAP1, ANLN, STMN1, CEP55, RACGAP1, KIF20A, MYH10	955	29	16792	7.88214	6.4456e-05	2.22269e-06	3.99702e-05
GOTERM_BP_DIRECT	GO:0006310~DNA recombination	21	1.96445	2.70711e-08	EXO1, HMGB1, HMGB3, BLM, PIF1, LIG1, XRCC6, LIG3, WRN, RAD54L, BRCA1, RAD51, MRE11, RPA3, RPA1, PAXIP1, RAD21, NSMCE4A, PSMC3IP, ACTL6A, RBM14	955	83	16792	4.44877	7.82866e-05	2.60965e-06	4.85472e-05
GOTERM_BP_DIRECT	GO:0042769~DNA damage response, detection of DNA damage	14	1.30964	4.02855e-08	DTL, USP1, RPA3, RFC5, RPA1, POLD3, RFC3, RFC4, RFC1, MRPS9, CUL4A, POLD1, RAD18, PARP1	955	36	16792	6.83793	0.000116499	3.75824e-06	7.22448e-05
GOTERM_BP_DIRECT	GO:0007051~spindle organization	10	0.935454	4.73231e-08	KIF11, CKAP5, SPAG5, TTK, AURKA, RANBP1, AURKB, KNSTRN, ASPM, AUNIP	955	16	16792	10.9895	0.000136849	4.27682e-06	8.48655e-05
GOTERM_BP_DIRECT	GO:0007080~mitotic metaphase plate congression	14	1.30964	5.8891e-08	KIF14, CCNB1, KIFC1, KIF22, KIF2C, CDCA8, PSRC1, KIF18A, CDC23, CENPE, CEP55, CDCA5, KPNB1, ZW10	955	37	16792	6.65312	0.000170298	5.16098e-06	0.00010561
GOTERM_BP_DIRECT	GO:0006974~cellular response to DNA damage stimulus	34	3.18054	7.84698e-08	BLM, SLF1, TIPIN, CHEK1, MCM10, FANCL, MCM8, MCM7, DDX11, ASH2L, WDR76, H2AFX, MASTL, FANCG, POLQ, TOP2A, DTL, SMC6, ATAD5, TOPBP1, WRN, HPF1, BRCA1, MRE11, RAD51, RAD1, USP28, TIMELESS, CUL4A, RAD18, ZRANB3, PARP1, UBE2T, BARD1	955	208	16792	2.87418	0.000226909	6.67452e-06	0.000140721
GOTERM_BP_DIRECT	GO:0016032~viral process	42	3.92891	1.44843e-07	CRTC3, XPO1, NUP160, POLA1, SYNCRIP, RNF216, RCC1, CBX5, NDC1, NUP214, SET, HNRNPK, DDX11, CENPA, BUB1, RHOA, H2AFX, RANBP1, NUP37, NUP54, CCNA2, NUP133, MSH6, NUP153, MAGI3, MPDZ, NUP88, CREB1, RBL1, NUP85, RB1, NUP155, CDC25C, HNRNPA1, MRE11, NUP62, CUL4A, HDAC1, PSMC3, CENPU, NUP107, DYNC1I2	955	299	16792	2.46989	0.000418798	1.19681e-05	0.000259749
GOTERM_BP_DIRECT	GO:0000083~regulation of transcription involved in G1/S transition of mitotic cell cycle	11	1.029	1.94049e-07	CDK1, CDC6, TYMS, CDC45, DHFR, RRM2, POLA1, FBXO5, RB1, ORC1, CDT1	955	23	16792	8.40938	0.000561031	1.55884e-05	0.000347991
GOTERM_BP_DIRECT	GO:0006297~nucleotide-excision repair, DNA gap filling	11	1.029	3.15736e-07	RFC5, POLD3, RPA1, RFC3, RFC4, RFC1, LIG1, POLD1, POLE, LIG3, RPA3	955	24	16792	8.05899	0.000912691	2.46783e-05	0.000566214
GOTERM_BP_DIRECT	GO:0006409~tRNA export from nucleus	12	1.12254	8.03975e-07	NDC1, NUP133, NUP214, NUP153, NUP62, NUP160, NUP88, NUP37, NUP85, NUP107, NUP54, NUP155	955	32	16792	6.59372	0.0023224	6.11849e-05	0.00144178
GOTERM_BP_DIRECT	GO:0010827~regulation of glucose transport	12	1.12254	1.1443e-06	NDC1, NUP133, NUP214, NUP153, NUP62, NUP160, NUP88, NUP37, NUP85, NUP107, NUP54, NUP155	955	33	16792	6.39391	0.00330386	8.4851e-05	0.00205208
GOTERM_BP_DIRECT	GO:0031297~replication fork processing	11	1.029	1.16143e-06	MMS22L, BLM, DDX11, NUCKS1, TONSL, ALYREF, SETMAR, EME1, WRN, ZRANB3, RAD51	955	27	16792	7.16354	0.00335323	8.3968e-05	0.0020828
GOTERM_BP_DIRECT	GO:0051225~spindle assembly	11	1.029	1.16143e-06	HAUS4, TUBB, HAUS5, CEP192, NEK2, HAUS2, HAUS1, HAUS7, HAUS8, RCC1, NCOR1	955	27	16792	7.16354	0.00335323	8.3968e-05	0.0020828
GOTERM_BP_DIRECT	GO:0010467~gene expression	14	1.30964	1.77886e-06	NCBP1, HNRNPA2B1, PTBP1, IGF2BP2, RBMX, HNRNPR, HNRNPA1, HNRNPU, HNRNPL, HNRNPM, HNRNPK, HNRNPF, HNRNPD, HNRNPH1	955	48	16792	5.12845	0.00513125	0.000125467	0.00319001
GOTERM_BP_DIRECT	GO:0000278~mitotic cell cycle	13	1.21609	1.79924e-06	XRCC2, PAK3, NUDT15, RRM1, PRDM5, CENPF, KIF18B, CENPW, CENPE, CNTRL, MYB, CDC25B, TFDP1	955	41	16792	5.57518	0.0051899	0.000123883	0.00322657
GOTERM_BP_DIRECT	GO:0007131~reciprocal meiotic recombination	11	1.029	3.53804e-06	RAD51D, MSH6, RAD21, XRCC2, MSH2, MND1, RAD54B, DMC1, RAD51, TRIP13, MRE11	955	30	16792	6.44719	0.0101799	0.000237926	0.00634466
GOTERM_BP_DIRECT	GO:0007088~regulation of mitotic nuclear division	10	0.935454	3.57597e-06	MKI67, NEK2, BORA, KIF20B, FBXO43, FBXO5, PKMYT1, RCC1, CDC25C, CCDC8	955	24	16792	7.32635	0.0102884	0.000235012	0.00641267
GOTERM_BP_DIRECT	GO:0075733~intracellular transport of virus	14	1.30964	3.74615e-06	NUP133, XPO1, NUP153, NUP160, NUP88, NUP85, NUP155, NDC1, NUP214, NUP62, NUP37, NUP107, NUP54, KPNB1	955	51	16792	4.82677	0.0107754	0.000240724	0.00671783
GOTERM_BP_DIRECT	GO:0071479~cellular response to ionizing radiation	11	1.029	4.95804e-06	RAD1, RAD51AP1, BLM, FIGNL1, INTS7, RHNO1, FBXO4, SNAI2, ECT2, KDM4D, RAD51	955	31	16792	6.23922	0.0142364	0.000311662	0.00889099
GOTERM_BP_DIRECT	GO:0006268~DNA unwinding involved in DNA replication	7	0.654818	5.70663e-06	MCM7, MCM2, TOP2B, MCM4, TOP2A, RAD51, MCM6	955	10	16792	12.3083	0.0163682	0.000351079	0.0102333
GOTERM_BP_DIRECT	GO:0034501~protein localization to kinetochore	7	0.654818	5.70663e-06	CDK1, KNL1, MTBP, TTK, BUB1B, AURKB, ZW10	955	10	16792	12.3083	0.0163682	0.000351079	0.0102333
GOTERM_BP_DIRECT	GO:0007093~mitotic cell cycle checkpoint	11	1.029	6.84625e-06	MAD2L1, ZWINT, KNTC1, BUB1, TTK, BUB1B, CHEK1, RB1, ZWILCH, SMC1A, ZW10	955	32	16792	6.04424	0.0196047	0.000412403	0.0122768
GOTERM_BP_DIRECT	GO:0007076~mitotic chromosome condensation	8	0.748363	8.03955e-06	NCAPH, NCAPG, NUSAP1, CDCA5, SMC2, NCAPD3, SMC4, NCAPD2	955	15	16792	9.37773	0.0229823	0.000474387	0.0144165
GOTERM_BP_DIRECT	GO:0051297~centrosome organization	11	1.029	9.32536e-06	HAUS4, HAUS5, XRCC2, CKAP5, PLK1, HAUS2, HAUS1, PPP1R12A, HAUS7, HAUS8, FES	955	33	16792	5.86108	0.0266087	0.000539236	0.016722
GOTERM_BP_DIRECT	GO:0007018~microtubule-based movement	17	1.59027	1.06587e-05	KIF14, KIF23, KIF22, KIFC1, KIF4A, KIF24, KIF11, KIF15, KIF18A, KIF18B, CENPE, RACGAP1, KIF2C, KIF20B, DYNC1I2, KIF2A, KIF20A	955	81	16792	3.69031	0.0303549	0.000604233	0.0191128
GOTERM_BP_DIRECT	GO:0010212~response to ionizing radiation	13	1.21609	1.37912e-05	RAD51D, USP28, PAXIP1, RFWD3, XRCC2, TICRR, RRM1, H2AFX, TOPBP1, DMC1, DNMT3B, RAD54L, BRCA1	955	49	16792	4.66494	0.0390995	0.000766715	0.0247292
GOTERM_BP_DIRECT	GO:0006298~mismatch repair	11	1.029	1.66705e-05	EXO1, POLD3, RPA1, MSH6, MSH2, LIG1, POLD1, MLH1, SETD2, RNASEH2A, RPA3	955	35	16792	5.52616	0.0470677	0.000909237	0.0298913
GOTERM_BP_DIRECT	GO:0090305~nucleic acid phosphodiester bond hydrolysis	16	1.49673	1.70965e-05	ENPP2, GEN1, POLE, EME1, POLA1, WRN, LOC81691, MRE11, RAD1, DNA2, DCLRE1A, DCLRE1B, TDP1, SETMAR, ZRANB3, FEN1	955	75	16792	3.75109	0.0482411	0.000915202	0.0306551
GOTERM_BP_DIRECT	GO:0090307~mitotic spindle assembly	11	1.029	2.19148e-05	KIFC1, TUBGCP3, KIF11, NEK2, RHOA, TPX2, BIRC5, MYBL2, KPNB1, FLNA, KIF2A	955	36	16792	5.37266	0.0614117	0.00115167	0.039293
GOTERM_BP_DIRECT	GO:0000723~telomere maintenance	11	1.029	2.19148e-05	RAD51D, POLD3, RPA1, DNA2, DCLRE1B, PIF1, POLD1, XRCC6, FBXO4, WRN, POT1	955	36	16792	5.37266	0.0614117	0.00115167	0.039293
GOTERM_BP_DIRECT	GO:0051310~metaphase plate congression	7	0.654818	2.27477e-05	FAM83D, KIF22, KIF2C, CENPQ, CENPF, CENPE, NDC80	955	12	16792	10.2569	0.0636699	0.00117408	0.0407861
GOTERM_BP_DIRECT	GO:0007126~meiotic nuclear division	9	0.841908	3.42499e-05	TUBGCP3, XRCC2, MKI67, DMC1, SMC1A, RAD54L, SMC3, RAD51, ZW10	955	24	16792	6.59372	0.0943048	0.00173625	0.0614033
GOTERM_BP_DIRECT	GO:0006312~mitotic recombination	7	0.654818	4.02135e-05	RAD51D, XRCC2, RAD54B, TOP2B, DMC1, TOP2A, RAD51	955	13	16792	9.4679	0.109792	0.00200316	0.0720911
GOTERM_BP_DIRECT	GO:0006303~double-strand break repair via nonhomologous end joining	14	1.30964	4.36798e-05	XRCC6, POLA1, MLH1, BRCA1, MRE11, PAXIP1, DCLRE1A, DCLRE1B, RIF1, MDC1, SETMAR, H2AFX, ATP23, BARD1	955	63	16792	3.90739	0.118671	0.0021388	0.0783029
GOTERM_BP_DIRECT	GO:0051276~chromosome organization	8	0.748363	5.14934e-05	CDCA8, SMCHD1, SFPQ, CENPW, NCAPH2, PTTG1, RAD54L, SMC4	955	19	16792	7.40347	0.138364	0.00247897	0.0923039
GOTERM_BP_DIRECT	GO:0000910~cytokinesis	12	1.12254	6.0961e-05	KIF23, PRC1, PLK1, INCENP, KLHL13, BRCA2, BIRC5, ESPL1, CIT, MYH9, ECT2, KIF20A	955	48	16792	4.39581	0.161637	0.00288607	0.109266
GOTERM_BP_DIRECT	GO:0000380~alternative mRNA splicing, via spliceosome	7	0.654818	6.69917e-05	SRSF1, KDM1A, HNRNPM, SRSF6, SFPQ, PTBP1, RBM17	955	14	16792	8.79162	0.176133	0.00312007	0.120069
GOTERM_BP_DIRECT	GO:0007094~mitotic spindle assembly checkpoint	8	0.748363	7.53479e-05	MAD2L1, PLK1, BUB1, CENPF, TTK, BUB1B, BUB3, ZW10	955	20	16792	7.0333	0.195806	0.00345298	0.135037
GOTERM_BP_DIRECT	GO:0006397~mRNA processing	25	2.33863	7.8637e-05	HNRNPA1L2, SRSF1, HNRNPL, USP39, NUDT21, LSM5, MAGOHB, QKI, LSM3, TSEN15, KHDRBS1, RBFOX2, GEMIN2, PTBP1, HNRNPA2B1, HNRNPR, HNRNPA1, TTF2, SRSF2, SRSF7, SFPQ, THRAP3, CPSF6, RBMXL1, SCAF8	955	179	16792	2.45576	0.20342	0.00354724	0.140927
GOTERM_BP_DIRECT	GO:0006606~protein import into nucleus	13	1.21609	8.31122e-05	NUP133, DRD1, NUP153, NUP88, NUP85, IPO9, NUP155, NUP214, CSE1L, NUP62, RANBP1, NUP107, KPNB1	955	58	16792	3.94107	0.213664	0.00369118	0.148942
GOTERM_BP_DIRECT	GO:0051321~meiotic cell cycle	10	0.935454	8.57518e-05	EXO1, SPIN1, NEK2, PSMC3IP, FBXO43, MNS1, H2AFX, BUB3, NR2C2, MRE11	955	34	16792	5.17154	0.219644	0.0037506	0.153669
GOTERM_BP_DIRECT	GO:0007095~mitotic G2 DNA damage checkpoint	7	0.654818	0.000106293	CDK1, BLM, FANCI, SLF1, TOPBP1, CCNA2, MRE11	955	15	16792	8.20551	0.264655	0.00457779	0.190446
GOTERM_BP_DIRECT	GO:0006396~RNA processing	17	1.59027	0.000107221	DHX9, EXOSC9, RBM3, SNRPD1, SYNCRIP, HNRNPDL, SART3, HNRNPU, EXOSC10, HNRNPL, HNRNPH3, HNRNPK, HNRNPUL1, HNRNPF, HNRNPD, DHX35, HNRNPH1	955	97	16792	3.0816	0.266625	0.00454989	0.192106
GOTERM_BP_DIRECT	GO:0048025~negative regulation of mRNA splicing, via spliceosome	8	0.748363	0.000107502	HNRNPK, SRSF10, SRSF7, SRSF6, TRA2B, PTBP1, HNRNPA2B1, RBMX	955	21	16792	6.69838	0.267221	0.00449583	0.19261
GOTERM_BP_DIRECT	GO:0007019~microtubule depolymerization	6	0.561272	0.000116102	KIF14, KIF2C, KIF24, KIF18A, KIF18B, STMN1	955	10	16792	10.5499	0.285224	0.00478546	0.208003
GOTERM_BP_DIRECT	GO:0032467~positive regulation of cytokinesis	10	0.935454	0.0001744	KIF23, KIF14, CDC6, KIF20B, RHOA, AURKB, RACGAP1, CIT, ECT2, CDC25B	955	37	16792	4.75223	0.396138	0.00707919	0.312295
GOTERM_BP_DIRECT	GO:0006296~nucleotide-excision repair, DNA incision, 5'-to lesion	10	0.935454	0.0001744	RFC5, POLD3, RPA1, RFC3, RFC4, RFC1, CUL4A, POLD1, PARP1, RPA3	955	37	16792	4.75223	0.396138	0.00707919	0.312295
GOTERM_BP_DIRECT	GO:0000077~DNA damage checkpoint	9	0.841908	0.000201005	E2F1, RAD1, CLSPN, USP28, INTS7, BRIP1, H2AFX, CHEK1, RHNO1	955	30	16792	5.27497	0.440866	0.00804201	0.359854
GOTERM_BP_DIRECT	GO:0033683~nucleotide-excision repair, DNA incision	10	0.935454	0.000217122	RFC5, POLD3, RPA1, RFC3, RFC4, RFC1, CUL4A, POLD1, PARP1, RPA3	955	38	16792	4.62717	0.466334	0.00856565	0.388655
GOTERM_BP_DIRECT	GO:0006405~RNA export from nucleus	12	1.12254	0.000224251	SRSF3, SRSF1, NCBP1, SRSF2, NUP214, NUP62, SRSF7, SRSF6, ALYREF, RANBP1, NUP155, HNRNPA1	955	55	16792	3.83634	0.477226	0.00872664	0.40139
GOTERM_BP_DIRECT	GO:1900034~regulation of cellular response to heat	14	1.30964	0.000280966	NUP133, NUP153, NUP160, NUP88, NUP85, NUP155, RPA3, RPA1, NDC1, NUP214, NUP62, NUP37, NUP107, NUP54	955	75	16792	3.28221	0.556327	0.0107771	0.502665
GOTERM_BP_DIRECT	GO:1900264~positive regulation of DNA-directed DNA polymerase activity	5	0.467727	0.000315524	RFC5, RFC3, RFC4, CHTF18, DSCC1	955	7	16792	12.5595	0.598537	0.0119366	0.564327
GOTERM_BP_DIRECT	GO:0051988~regulation of attachment of spindle microtubules to kinetochore	5	0.467727	0.000315524	NEK2, SPAG5, RACGAP1, KNSTRN, ECT2	955	7	16792	12.5595	0.598537	0.0119366	0.564327
GOTERM_BP_DIRECT	GO:0042276~error-prone translesion synthesis	7	0.654818	0.000473553	RFC5, RPA1, RFC3, RFC4, POLE2, RFC1, RPA3	955	19	16792	6.47804	0.745852	0.0176328	0.845836
GOTERM_BP_DIRECT	GO:0051298~centrosome duplication	7	0.654818	0.000473553	STIL, TUBGCP3, NDE1, CKAP5, CEP192, BRCA2, CEP152	955	19	16792	6.47804	0.745852	0.0176328	0.845836
GOTERM_BP_DIRECT	GO:0071897~DNA biosynthetic process	8	0.748363	0.00047377	TYMS, LIN9, LIG1, PRIM2, LIG3, CENPF, POLQ, TK1	955	26	16792	5.41023	0.746012	0.0174166	0.846222
GOTERM_BP_DIRECT	GO:0031145~anaphase-promoting complex-dependent catabolic process	14	1.30964	0.000474883	CDK1, SKP2, CDC23, CDC20, AURKA, PTTG1, AURKB, UBE2C, CCNB1, MAD2L1, PLK1, PSMC3, BUB1B, BUB3	955	79	16792	3.11602	0.746829	0.0172382	0.848203
GOTERM_BP_DIRECT	GO:0031047~gene silencing by RNA	17	1.59027	0.000524355	NUP133, NCBP1, NUP153, NUP160, NUP88, NUP85, NUP155, NDC1, DROSHA, NUP214, DGCR8, NUP62, NUP37, H3F3B, NUP107, NUP54, TNRC6A	955	111	16792	2.69293	0.780594	0.0187818	0.936174
GOTERM_BP_DIRECT	GO:2000001~regulation of DNA damage checkpoint	5	0.467727	0.000602648	RFWD3, CUL4A, WDR76, FBXO4, RNASEH2B	955	8	16792	10.9895	0.825072	0.0212933	1.07524
GOTERM_BP_DIRECT	GO:0000076~DNA replication checkpoint	5	0.467727	0.000602648	CDC6, DNA2, CDC45, TIPIN, CDT1	955	8	16792	10.9895	0.825072	0.0212933	1.07524
GOTERM_BP_DIRECT	GO:0006284~base-excision repair	9	0.841908	0.000627783	RPA1, HMGB1, DNA2, LIG1, NEIL3, WRN, POLQ, FEN1, RPA3	955	35	16792	4.52141	0.837344	0.0219043	1.11985
GOTERM_BP_DIRECT	GO:0016569~covalent chromatin modification	17	1.59027	0.000641008	ING3, SPIN1, TRIM28, ANP32E, RBL1, DEK, CBX2, RB1, TET1, PHF19, SMARCE1, SMARCB1, SMARCD1, DNMT1, PBRM1, ASF1B, NCOR1	955	113	16792	2.64527	0.843451	0.0220943	1.14332
GOTERM_BP_DIRECT	GO:0045876~positive regulation of sister chromatid cohesion	4	0.374181	0.000700253	RAD21, DDX11, SFPQ, FEN1	955	4	16792	17.5832	0.868117	0.0238287	1.24836
GOTERM_BP_DIRECT	GO:0007064~mitotic sister chromatid cohesion	6	0.561272	0.000761828	RAD21, PDS5B, SMC1A, CDCA5, GSG2, SMC3	955	14	16792	7.53568	0.889644	0.0255967	1.35742
GOTERM_BP_DIRECT	GO:0019985~translesion synthesis	9	0.841908	0.00076746	RFC5, POLD3, RPA1, RFC3, RFC4, RFC1, DTL, POLD1, RPA3	955	36	16792	4.39581	0.891429	0.0254876	1.3674
GOTERM_BP_DIRECT	GO:0006369~termination of RNA polymerase II transcription	12	1.12254	0.000873996	SRSF3, SRSF1, NCBP1, SRSF2, SRSF7, SRSF6, NUDT21, ALYREF, CPSF7, SNRPF, TTF2, SLBP	955	64	16792	3.29686	0.920237	0.0286472	1.55581
GOTERM_BP_DIRECT	GO:0006283~transcription-coupled nucleotide-excision repair	13	1.21609	0.000886896	LIG1, COPS3, LIG3, RPA3, RPA1, POLD3, RFC5, RFC3, AQR, RFC4, CUL4A, RFC1, POLD1	955	74	16792	3.08895	0.923161	0.0287385	1.5786
GOTERM_BP_DIRECT	GO:0008608~attachment of spindle microtubules to kinetochore	5	0.467727	0.00103604	KNL1, SGO1, NDC80, AURKB, BUB3	955	9	16792	9.76847	0.950103	0.0331221	1.84175
GOTERM_BP_DIRECT	GO:0000075~cell cycle checkpoint	5	0.467727	0.00103604	CCNE2, DCLRE1B, TICRR, RB1, FANCG	955	9	16792	9.76847	0.950103	0.0331221	1.84175
GOTERM_BP_DIRECT	GO:0030071~regulation of mitotic metaphase/anaphase transition	5	0.467727	0.00103604	CDC6, PLK1, CDC23, CENPE, UBE2C	955	9	16792	9.76847	0.950103	0.0331221	1.84175
GOTERM_BP_DIRECT	GO:0006351~transcription, DNA-templated	143	13.377	0.00106959	ITGB3BP, SLC2A4RG, TMEM18, XRCC6, ZNF827, CBX2, MED22, MED20, KDM1A, CDCA7, CASP8AP2, DDX11, ZNF300, PHTF2, PSIP1, ZNF107, PATZ1, ZNF445, ATOH8, ZNF507, RBL1, ZNF501, DEPDC1, UHRF1, KDM2B, TIMELESS, RFC1, PRDM5, CDCA7L, TGIF2, IRAK1BP1, CRTC3, TSHZ3, ZNF519, HMGB2, HMGB3, ZNF619, TADA1, NR2C2, MOV10, SMARCB1, TEAD4, HNRNPD, PBRM1, ASF1B, EWSR1, HELLS, TFDP1, KAT7, SMAD9, KLF12, WDR5, ASXL1, ZNF62…	955	1955	16792	1.28614	0.954721	0.0338034	1.90085
GOTERM_BP_DIRECT	GO:0000729~DNA double-strand break processing	6	0.561272	0.0010896	DNA2, BLM, SETMAR, BRCA1, MRE11, BARD1	955	15	16792	7.0333	0.957269	0.0340531	1.93607
GOTERM_BP_DIRECT	GO:0000079~regulation of cyclin-dependent protein serine/threonine kinase activity	9	0.841908	0.00134164	CCNE2, CDC6, BLM, CDKN2C, PKMYT1, CDC25C, CDKN3, CCNA2, CDC25A	955	39	16792	4.05767	0.979404	0.0413245	2.37886
GOTERM_BP_DIRECT	GO:0051439~regulation of ubiquitin-protein ligase activity involved in mitotic cell cycle	7	0.654818	0.00144933	CCNB1, CDK1, PLK1, FBXO5, CDC23, CDC20, UBE2C	955	23	16792	5.35142	0.984922	0.0441001	2.56746
GOTERM_BP_DIRECT	GO:0051103~DNA ligation involved in DNA repair	5	0.467727	0.00164934	HMGB1, HMGB2, LIG1, LIG3, PARP1	955	10	16792	8.79162	0.991552	0.0495173	2.91684
GOTERM_BP_DIRECT	GO:0000727~double-strand break repair via break-induced replication	4	0.374181	0.00167648	CDC7, GINS2, CDC45, GINS4	955	5	16792	14.0666	0.992191	0.0497957	2.96416
GOTERM_BP_DIRECT	GO:0045910~negative regulation of DNA recombination	4	0.374181	0.00167648	MSH6, BLM, MSH2, ZRANB3	955	5	16792	14.0666	0.992191	0.0497957	2.96416
GOTERM_BP_DIRECT	GO:0010032~meiotic chromosome condensation	4	0.374181	0.00167648	SMC2, NCAPD3, SMC4, NCAPD2	955	5	16792	14.0666	0.992191	0.0497957	2.96416
GOTERM_BP_DIRECT	GO:0051571~positive regulation of histone H3-K4 methylation	6	0.561272	0.00204169	PAXIP1, SMAD4, DNMT1, MYB, DNMT3B, BRCA1	955	17	16792	6.20585	0.997289	0.0597119	3.5988
GOTERM_BP_DIRECT	GO:0006306~DNA methylation	7	0.654818	0.00230696	KMT2E, MTA2, EZH2, DNMT1, EHMT2, DNMT3B, HELLS	955	25	16792	4.92331	0.998744	0.0665429	4.0573
GOTERM_BP_DIRECT	GO:0045893~positive regulation of transcription, DNA-templated	46	4.30309	0.00265794	KMT2E, ENY2, E2F1, CKS1B, HMGB2, BLM, ELF4, FOXM1, XRCC6, NFYB, GLI2, GLI1, MYOCD, ILK, HNRNPD, ATOH8, MYB, PLCB1, CCNA2, ZNF496, FOXJ2, CREB1, PSRC1, TRIM28, SMAD4, MED12, BRCA2, ATAD2, NUP85, ILF3, MED14, RB1, BRCA1, NUP62, ILF2, ID2, RFC1, HDAC1, SIX1, THRAP3, ZNF711, CKS2, ROR2, TGFB1I1, TBL1X, NSD1	955	515	16792	1.57054	0.999546	0.0755357	4.66078
GOTERM_BP_DIRECT	GO:0001556~oocyte maturation	6	0.561272	0.00269609	CCNB1, FBXO5, BRCA2, DMC1, CDC25B, TRIP13	955	18	16792	5.86108	0.999593	0.0758351	4.72615
GOTERM_BP_DIRECT	GO:0006261~DNA-dependent DNA replication	6	0.561272	0.00269609	POLD3, RPA1, POLE2, RFC1, MCMBP, POLQ	955	18	16792	5.86108	0.999593	0.0758351	4.72615
GOTERM_BP_DIRECT	GO:0000122~negative regulation of transcription from RNA polymerase II promoter	60	5.61272	0.00285335	E2F1, XPO1, E2F8, EZH2, FST, PRRX1, CBX2, AURKB, PAWR, GLI2, KDM1A, MYOCD, MYB, ZNF496, NR2F1, MTA2, ARID5B, RBL1, HNRNPA2B1, RB1, RBBP7, UHRF1, KDM2B, NCOA2, RFC1, TIMELESS, SIX1, PRDM5, ZFPM2, TGIF2, NSD1, HMGB1, TSHZ3, FOXM1, TAF9B, NFIX, CALR, SORBS3, EZR, MEIS2, TCERG1, DNMT3B, KLF12, TRIM28, ASXL1, SMAD4, SNAI2, EHMT2, SUV39H2, PHF19, ID2, HDAC1, PHF14, PLK1, SFPQ, DNMT1, ID4, PARP1, TBL1X,…	955	720	16792	1.46527	0.999742	0.0793144	4.9952
GOTERM_BP_DIRECT	GO:0031536~positive regulation of exit from mitosis	4	0.374181	0.00321134	PHB2, BIRC5, UBE2C, CDCA5	955	6	16792	11.7222	0.999909	0.0879865	5.60502
GOTERM_BP_DIRECT	GO:0051573~negative regulation of histone H3-K9 methylation	4	0.374181	0.00321134	KDM1A, DNMT1, DNMT3B, BRCA1	955	6	16792	11.7222	0.999909	0.0879865	5.60502
GOTERM_BP_DIRECT	GO:0048478~replication fork protection	4	0.374181	0.00321134	BLM, TIPIN, BRCA2, ZRANB3	955	6	16792	11.7222	0.999909	0.0879865	5.60502
GOTERM_BP_DIRECT	GO:0071168~protein localization to chromatin	4	0.374181	0.00321134	RAD21, PLK1, EZH2, ESCO2	955	6	16792	11.7222	0.999909	0.0879865	5.60502
GOTERM_BP_DIRECT	GO:0070987~error-free translesion synthesis	6	0.561272	0.00348985	RFC5, RPA1, RFC3, RFC4, RFC1, RPA3	955	19	16792	5.5526	0.999959	0.0943665	6.07689
GOTERM_BP_DIRECT	GO:0035329~hippo signaling	7	0.654818	0.00349932	TEAD4, TEAD1, AMOT, TEAD2, TEAD3, AMOTL1, AMOTL2	955	27	16792	4.55862	0.99996	0.0937365	6.0929
GOTERM_BP_DIRECT	GO:0001833~inner cell mass cell proliferation	5	0.467727	0.00354802	GINS1, NCAPG2, GINS4, BRCA2, CHEK1	955	12	16792	7.32635	0.999966	0.0941104	6.17516
GOTERM_BP_DIRECT	GO:0051382~kinetochore assembly	5	0.467727	0.00354802	CENPA, CENPF, CENPW, CENPE, CENPH	955	12	16792	7.32635	0.999966	0.0941104	6.17516
GOTERM_BP_DIRECT	GO:0051056~regulation of small GTPase mediated signal transduction	17	1.59027	0.00388082	ARHGAP19, ARHGEF17, RACGAP1, ITSN1, ECT2, ARHGAP32, PLEKHG2, ARHGAP20, ARHGAP33, TIAM2, RHOA, AMOT, ARHGAP11B, DEPDC1B, ARHGAP11A, SRGAP1, ARHGAP10	955	134	16792	2.23071	0.999987	0.101561	6.73553
GOTERM_BP_DIRECT	GO:0001843~neural tube closure	12	1.12254	0.00401875	MTHFD1, STIL, MKS1, SHROOM3, TULP3, IFT122, CC2D2A, KIF20B, MED12, TEAD2, SETD2, MTHFD1L	955	77	16792	2.74025	0.999991	0.104045	6.96685
GOTERM_BP_DIRECT	GO:0051568~histone H3-K4 methylation	6	0.561272	0.0044384	KMT2E, PAXIP1, ASH2L, WDR5, SETMAR, WDR82	955	20	16792	5.27497	0.999997	0.113282	7.6673
GOTERM_BP_DIRECT	GO:0042384~cilium assembly	16	1.49673	0.00449567	IQCB1, SCLT1, MKS1, ICK, KIF24, IFT122, CEP162, TRIM59, CEP89, PCNT, CC2D2A, DZIP1L, CEP41, ALMS1, FAM161A, FLNA	955	124	16792	2.26881	0.999998	0.113661	7.76251
GOTERM_BP_DIRECT	GO:0051028~mRNA transport	9	0.841908	0.00459278	HNRNPA1L2, NCBP1, XPO1, MAGOHB, QKI, IGF2BP2, HNRNPA1, NCBP3, SLBP	955	47	16792	3.367	0.999998	0.114973	7.92373
GOTERM_BP_DIRECT	GO:0000381~regulation of alternative mRNA splicing, via spliceosome	8	0.748363	0.0050171	HNRNPL, RBFOX2, SRSF2, SRSF6, TRA2B, THRAP3, PTBP1, RBMX	955	38	16792	3.70174	1	0.123866	8.62507
GOTERM_BP_DIRECT	GO:0006333~chromatin assembly or disassembly	4	0.374181	0.00538321	MTA2, HIRIP3, ASF1B, SUV39H2	955	7	16792	10.0476	1	0.131192	9.22615
GOTERM_BP_DIRECT	GO:0072711~cellular response to hydroxyurea	4	0.374181	0.00538321	BLM, TIMELESS, DDX11, RAD51	955	7	16792	10.0476	1	0.131192	9.22615
GOTERM_BP_DIRECT	GO:0042148~strand invasion	4	0.374181	0.00538321	RAD51D, XRCC2, DMC1, RAD51	955	7	16792	10.0476	1	0.131192	9.22615
GOTERM_BP_DIRECT	GO:0001649~osteoblast differentiation	14	1.30964	0.00598009	DHX9, FIGNL1, ALYREF, SYNCRIP, GLI2, SNAI2, RBMX, TPM4, HNRNPU, FBL, GLI1, GDF10, CREB3L1, H3F3B	955	104	16792	2.36698	1	0.14348	10.1981
GOTERM_BP_DIRECT	GO:0008380~RNA splicing	19	1.77736	0.00635779	HNRNPA1L2, RBFOX2, NCBP1, GEMIN2, PTBP1, SNRPD1, SYNCRIP, TTF2, SRSF2, HNRNPH3, SRSF7, SFPQ, USP39, THRAP3, QKI, RBMXL1, MAGOHB, SNRPF, SCAF8	955	166	16792	2.01254	1	0.150607	10.8081
GOTERM_BP_DIRECT	GO:0031573~intra-S DNA damage checkpoint	5	0.467727	0.00655054	MDC1, MSH2, EME1, TIPIN, MRE11	955	14	16792	6.27973	1	0.153566	11.1178
GOTERM_BP_DIRECT	GO:0051436~negative regulation of ubiquitin-protein ligase activity involved in mitotic cell cycle	11	1.029	0.00659349	CCNB1, CDK1, MAD2L1, PSMC3, FBXO43, FBXO5, CDC23, BUB1B, CDC20, UBE2C, BUB3	955	71	16792	2.72416	1	0.15326	11.1867
GOTERM_BP_DIRECT	GO:0007346~regulation of mitotic cell cycle	8	0.748363	0.00671758	CKS1B, PLK1, CKS2, FBXO5, SAE1, BIRC5, RB1, RPA3	955	40	16792	3.51665	1	0.154681	11.3855
GOTERM_BP_DIRECT	GO:0051262~protein tetramerization	8	0.748363	0.00671758	MTMR2, SHMT1, SBF2, NUDT21, CPSF7, CPSF6, ADSL, FH	955	40	16792	3.51665	1	0.154681	11.3855
GOTERM_BP_DIRECT	GO:0031124~mRNA 3'-end processing	9	0.841908	0.00675196	SRSF3, SRSF1, NCBP1, SRSF2, SRSF7, SRSF6, NUDT21, ALYREF, CPSF7	955	50	16792	3.16498	1	0.15419	11.4404
GOTERM_BP_DIRECT	GO:0051000~positive regulation of nitric-oxide synthase activity	6	0.561272	0.00686059	KRAS, NOD1, DHFR, CALM3, NPR3, HTR2B	955	22	16792	4.79543	1	0.155256	11.614
GOTERM_BP_DIRECT	GO:0051983~regulation of chromosome segregation	4	0.374181	0.00825154	KIF2C, MKI67, BUB1, AURKB	955	8	16792	8.79162	1	0.182386	13.8078
GOTERM_BP_DIRECT	GO:0051256~mitotic spindle midzone assembly	4	0.374181	0.00825154	KIF23, KIF4A, AURKB, RACGAP1	955	8	16792	8.79162	1	0.182386	13.8078
GOTERM_BP_DIRECT	GO:0031497~chromatin assembly	4	0.374181	0.00825154	HMGB1, RBBP4, CHAF1A, CHAF1B	955	8	16792	8.79162	1	0.182386	13.8078
GOTERM_BP_DIRECT	GO:1990403~embryonic brain development	4	0.374181	0.00825154	MKS1, TRA2B, CC2D2A, MED12	955	8	16792	8.79162	1	0.182386	13.8078
GOTERM_BP_DIRECT	GO:2000781~positive regulation of double-strand break repair	4	0.374181	0.00825154	TIMELESS, DDX11, FOXM1, SLF1	955	8	16792	8.79162	1	0.182386	13.8078
GOTERM_BP_DIRECT	GO:0060236~regulation of mitotic spindle organization	4	0.374181	0.00825154	PSRC1, BORA, TPX2, TACC3	955	8	16792	8.79162	1	0.182386	13.8078
GOTERM_BP_DIRECT	GO:0048702~embryonic neurocranium morphogenesis	4	0.374181	0.00825154	MTHFD1, TULP3, MED12, MTHFD1L	955	8	16792	8.79162	1	0.182386	13.8078
GOTERM_BP_DIRECT	GO:0043044~ATP-dependent chromatin remodeling	6	0.561272	0.00836372	RBBP4, SMARCE1, HDAC1, SMARCB1, MTA2, ACTL6A	955	23	16792	4.58693	1	0.183243	13.9825
GOTERM_BP_DIRECT	GO:0006338~chromatin remodeling	12	1.12254	0.00928124	RBBP4, SMARCE1, HDAC1, SMARCB1, SMARCD1, PBRM1, DEK, ACTL6A, RB1, MYB, SCMH1, SUV39H2	955	86	16792	2.45348	1	0.199777	15.3986
GOTERM_BP_DIRECT	GO:0044774~mitotic DNA integrity checkpoint	3	0.280636	0.00930784	SETMAR, TOP2B, TOP2A	955	3	16792	17.5832	1	0.198824	15.4393
GOTERM_BP_DIRECT	GO:0051383~kinetochore organization	3	0.280636	0.00930784	SMC2, CENPH, SMC4	955	3	16792	17.5832	1	0.198824	15.4393
GOTERM_BP_DIRECT	GO:0071173~spindle assembly checkpoint	3	0.280636	0.00930784	KNL1, BUB1, BUB3	955	3	16792	17.5832	1	0.198824	15.4393
GOTERM_BP_DIRECT	GO:2001034~positive regulation of double-strand break repair via nonhomologous end joining	3	0.280636	0.00930784	RIF1, SETMAR, KDM4D	955	3	16792	17.5832	1	0.198824	15.4393
GOTERM_BP_DIRECT	GO:0030951~establishment or maintenance of microtubule cytoskeleton polarity	3	0.280636	0.00930784	KIF2C, CKAP5, LMNA	955	3	16792	17.5832	1	0.198824	15.4393
GOTERM_BP_DIRECT	GO:0051437~positive regulation of ubiquitin-protein ligase activity involved in regulation of mitotic cell cycle transition	11	1.029	0.0105777	CCNB1, CDK1, MAD2L1, PSMC3, PLK1, FBXO5, CDC23, BUB1B, CDC20, UBE2C, BUB3	955	76	16792	2.54494	1	0.221222	17.3621
GOTERM_BP_DIRECT	GO:0045944~positive regulation of transcription from RNA polymerase II promoter	74	6.92236	0.0108396	E2F1, FOSL2, ELF4, XRCC6, E2F8, PRRX1, ZNF639, GLI2, GLI1, KDM1A, JADE1, RAD21, ASH2L, MYOCD, H2AFZ, PSIP1, CREB3L1, CREB3L4, MYB, TOP2A, STAG1, NR2F1, EXOSC9, SSBP2, FOXJ2, MTA2, RBL1, MED12, MED14, RB1, NPAS4, PRKD1, UHRF1, SENP1, NCOA2, SIX1, ZFPM2, CRTC3, HMGB1, HMGB2, FOXM1, TAF9B, NFIX, MYBL2, NR2C2, MEIS2, HNRNPK, SMARCB1, PPP1R12A, TFDP1, CKAP2, KLF12, NUCKS1, CREB1, ASXL1, TRIM28, SMAD4,…	955	981	16792	1.32636	1	0.224453	17.7535
GOTERM_BP_DIRECT	GO:0006275~regulation of DNA replication	5	0.467727	0.010878	NUCKS1, EHMT2, SMC3, ESCO2, DSCC1	955	16	16792	5.49476	1	0.223573	17.8108
GOTERM_BP_DIRECT	GO:0016446~somatic hypermutation of immunoglobulin genes	5	0.467727	0.010878	EXO1, MSH6, MSH2, MLH1, POLQ	955	16	16792	5.49476	1	0.223573	17.8108
GOTERM_BP_DIRECT	GO:0010569~regulation of double-strand break repair via homologous recombination	5	0.467727	0.010878	KDM1A, RAD51AP1, FIGNL1, CHEK1, RAD51	955	16	16792	5.49476	1	0.223573	17.8108
GOTERM_BP_DIRECT	GO:0045892~negative regulation of transcription, DNA-templated	42	3.92891	0.011106	E2F1, TSHZ3, HMGB2, FOXM1, XRCC6, EZH2, ZNF639, NOSTRIN, CALR, CBX5, KDM1A, SET, TRIM6, PATZ1, ATOH8, MYB, PLCB1, KHDRBS1, RBFOX2, ZNF93, ARID5B, GMNN, TRIM28, SMAD4, CENPF, ILF3, BIRC5, DEPDC1, RB1, MXD3, BRCA1, SUV39H2, TIMELESS, SMARCE1, ID2, HDAC1, SFPQ, PHB2, PRDM5, ZFPM2, ID4, SCMH1	955	499	16792	1.47995	1	0.226117	18.1498
GOTERM_BP_DIRECT	GO:0007096~regulation of exit from mitosis	4	0.374181	0.0118593	KNTC1, CDC23, ANLN, ZW10	955	9	16792	7.81478	1	0.237894	19.2608
GOTERM_BP_DIRECT	GO:0033314~mitotic DNA replication checkpoint	4	0.374181	0.0118593	CLSPN, TICRR, SLF1, TOPBP1	955	9	16792	7.81478	1	0.237894	19.2608
GOTERM_BP_DIRECT	GO:0006265~DNA topological change	4	0.374181	0.0118593	HMGB1, HMGB2, TOP2B, TOP2A	955	9	16792	7.81478	1	0.237894	19.2608
GOTERM_BP_DIRECT	GO:0031110~regulation of microtubule polymerization or depolymerization	4	0.374181	0.0118593	SKA3, SKA2, STMN1, SKA1	955	9	16792	7.81478	1	0.237894	19.2608
GOTERM_BP_DIRECT	GO:0001578~microtubule bundle formation	6	0.561272	0.0120237	PRC1, PLK1, PSRC1, MTCL1, FES, KIF20A	955	25	16792	4.21998	1	0.23914	19.5013
GOTERM_BP_DIRECT	GO:0021987~cerebral cortex development	9	0.841908	0.0132625	KIF14, KDM1A, NDE1, WDR62, H2AFX, ARHGAP11B, PLCB1, TACC3, ASPM	955	56	16792	2.82588	1	0.258675	21.2924
GOTERM_BP_DIRECT	GO:0006337~nucleosome disassembly	5	0.467727	0.0135969	SET, SMARCE1, SMARCB1, SMARCD1, SUPT16H	955	17	16792	5.17154	1	0.262548	21.7694
GOTERM_BP_DIRECT	GO:0016575~histone deacetylation	8	0.748363	0.0143784	KDM1A, RBBP4, HDAC1, MTA2, PRDM5, RBM14, RBBP7, TBL1X	955	46	16792	3.05796	1	0.273652	22.8734
GOTERM_BP_DIRECT	GO:0019886~antigen processing and presentation of exogenous peptide antigen via MHC class II	12	1.12254	0.0150206	KIF23, SEC23A, KIF22, KIF2C, KIF4A, KIF11, KIF15, KIF18A, CENPE, RACGAP1, DYNC1I2, KIF2A	955	92	16792	2.29347	1	0.282215	23.7698
GOTERM_BP_DIRECT	GO:0055015~ventricular cardiac muscle cell development	4	0.374181	0.016235	CCNB1, CDK1, LMNA, MYH10	955	10	16792	7.0333	1	0.299469	25.4377
GOTERM_BP_DIRECT	GO:0035999~tetrahydrofolate interconversion	4	0.374181	0.016235	MTHFD1, TYMS, SHMT1, MTHFD1L	955	10	16792	7.0333	1	0.299469	25.4377
GOTERM_BP_DIRECT	GO:0033151~V(D)J recombination	4	0.374181	0.016235	HMGB1, HMGB2, LIG1, LIG3	955	10	16792	7.0333	1	0.299469	25.4377
GOTERM_BP_DIRECT	GO:0046653~tetrahydrofolate metabolic process	4	0.374181	0.016235	TYMS, SHMT1, DHFR, MTHFD1L	955	10	16792	7.0333	1	0.299469	25.4377
GOTERM_BP_DIRECT	GO:0006890~retrograde vesicle-mediated transport, Golgi to ER	11	1.029	0.0175092	KIF23, KIF22, KIF2C, KIF4A, KIF11, KIF15, KIF18A, CENPE, RACGAP1, ZW10, KIF2A	955	82	16792	2.35873	1	0.316981	27.1507
GOTERM_BP_DIRECT	GO:0043137~DNA replication, removal of RNA primer	3	0.280636	0.0179154	DNA2, RNASEH2A, FEN1	955	4	16792	13.1874	1	0.321091	27.689
GOTERM_BP_DIRECT	GO:0045132~meiotic chromosome segregation	3	0.280636	0.0179154	SGO1, SMC2, SMC4	955	4	16792	13.1874	1	0.321091	27.689
GOTERM_BP_DIRECT	GO:2000373~positive regulation of DNA topoisomerase (ATP-hydrolyzing) activity	3	0.280636	0.0179154	UHRF1, SETMAR, HNRNPU	955	4	16792	13.1874	1	0.321091	27.689
GOTERM_BP_DIRECT	GO:0040001~establishment of mitotic spindle localization	3	0.280636	0.0179154	NUSAP1, ESPL1, KPNB1	955	4	16792	13.1874	1	0.321091	27.689
GOTERM_BP_DIRECT	GO:0043504~mitochondrial DNA repair	3	0.280636	0.0179154	DNA2, LIG3, PARP1	955	4	16792	13.1874	1	0.321091	27.689
GOTERM_BP_DIRECT	GO:0032392~DNA geometric change	3	0.280636	0.0179154	HMGB1, HMGB2, HMGB3	955	4	16792	13.1874	1	0.321091	27.689
GOTERM_BP_DIRECT	GO:0007079~mitotic chromosome movement towards spindle pole	3	0.280636	0.0179154	DLGAP5, CENPE, KPNB1	955	4	16792	13.1874	1	0.321091	27.689
GOTERM_BP_DIRECT	GO:0016321~female meiosis chromosome segregation	3	0.280636	0.0179154	PLK1, MLH1, TTK	955	4	16792	13.1874	1	0.321091	27.689
GOTERM_BP_DIRECT	GO:0007091~metaphase/anaphase transition of mitotic cell cycle	3	0.280636	0.0179154	CDC23, BUB1B, TACC3	955	4	16792	13.1874	1	0.321091	27.689
GOTERM_BP_DIRECT	GO:0046602~regulation of mitotic centrosome separation	3	0.280636	0.0179154	KIF11, NEK2, CHEK1	955	4	16792	13.1874	1	0.321091	27.689
GOTERM_BP_DIRECT	GO:0051984~positive regulation of chromosome segregation	3	0.280636	0.0179154	CDC6, RAD18, SMC6	955	4	16792	13.1874	1	0.321091	27.689
GOTERM_BP_DIRECT	GO:0045589~regulation of regulatory T cell differentiation	3	0.280636	0.0179154	DROSHA, FANCD2, FANCA	955	4	16792	13.1874	1	0.321091	27.689
GOTERM_BP_DIRECT	GO:0071459~protein localization to chromosome, centromeric region	3	0.280636	0.0179154	CENPA, RB1, GSG2	955	4	16792	13.1874	1	0.321091	27.689
GOTERM_BP_DIRECT	GO:0006468~protein phosphorylation	38	3.55472	0.0183729	PHKA2, NUAK2, NEK3, PPP4R1, NEK2, PASK, PKMYT1, AURKA, PXK, AURKB, FES, VRK1, PKN3, ILK, BUB1, ATP23, CDK15, PRKCA, SMAD9, CREB1, PRKCI, RAF1, BIRC5, ILF3, PBK, CDKL5, GSG2, CDC25B, PRKD1, HUNK, ICK, MAP4K5, PLK4, CDKL1, PLK1, BUB1B, CIT, LIPE	955	456	16792	1.46527	1	0.325868	28.2907
GOTERM_BP_DIRECT	GO:0045931~positive regulation of mitotic cell cycle	6	0.561272	0.0193345	PRKCA, CCNB1, CDK1, BRCA2, BIRC5, CDC25B	955	28	16792	3.76784	1	0.337767	29.54
GOTERM_BP_DIRECT	GO:0007283~spermatogenesis	33	3.087	0.0199106	E2F1, ZNF519, KIFC1, HMGB2, DIAPH3, PCDHGA9, MLH1, CLDN11, PTTG1, CALR, NR2C2, GLI1, NDC1, RPL39L, MNS1, CREB3L4, H2AFX, PATZ1, ASF1B, ASPM, TRIP13, SMAD4, AXL, BRCA2, RACGAP1, CDC25C, TESMIN, CCNB1, KDM2B, NUP62, KIAA1524, SCMH1, DMC1	955	385	16792	1.50714	1	0.343916	30.2786
GOTERM_BP_DIRECT	GO:0006139~nucleobase-containing compound metabolic process	8	0.748363	0.0199399	TYMS, DDX11, BRIP1, SRBD1, PRPS2, DDX12P, TK1, DUT	955	49	16792	2.87073	1	0.342333	30.316
GOTERM_BP_DIRECT	GO:0042752~regulation of circadian rhythm	8	0.748363	0.0199399	TIMELESS, ID2, SFPQ, CREB1, EZH2, HNRNPD, PPP1CC, TOP2A	955	49	16792	2.87073	1	0.342333	30.316
GOTERM_BP_DIRECT	GO:0043486~histone exchange	4	0.374181	0.0213947	NASP, ANP32E, ANP32A, PTMA	955	11	16792	6.39391	1	0.360295	32.1478
GOTERM_BP_DIRECT	GO:0006099~tricarboxylic acid cycle	6	0.561272	0.0223005	NNT, SUCLG2, IDH2, PDHA1, PDHB, FH	955	29	16792	3.63791	1	0.37034	33.2654
GOTERM_BP_DIRECT	GO:0006977~DNA damage response, signal transduction by p53 class mediator resulting in cell cycle arrest	9	0.841908	0.0234773	CCNB1, E2F1, CDK1, AURKA, CDC25C, CENPJ, CASP2, GTSE1, TFDP1	955	62	16792	2.55241	1	0.383591	34.6912
GOTERM_BP_DIRECT	GO:0031572~G2 DNA damage checkpoint	5	0.467727	0.0241869	CLSPN, DTL, PLK1, CHEK1, BRCA1	955	20	16792	4.39581	1	0.390528	35.5371
GOTERM_BP_DIRECT	GO:0019083~viral transcription	13	1.21609	0.0252114	NUP133, RPSA, NUP153, NUP160, NUP88, NUP85, NUP155, NDC1, NUP214, NUP62, NUP37, NUP107, NUP54	955	112	16792	2.04091	1	0.401196	36.7401
GOTERM_BP_DIRECT	GO:0006611~protein export from nucleus	6	0.561272	0.0255464	XPO1, CCHCR1, NUP214, CSE1L, NUP88, CALR	955	30	16792	3.51665	1	0.40318	37.1288
GOTERM_BP_DIRECT	GO:0071480~cellular response to gamma radiation	5	0.467727	0.0285704	KDM1A, XRCC6, H2AFX, WRN, RAD51	955	21	16792	4.18649	1	0.436828	40.5373
GOTERM_BP_DIRECT	GO:0007129~synapsis	5	0.467727	0.0285704	NDC1, FANCD2, MLH1, DMC1, MRE11	955	21	16792	4.18649	1	0.436828	40.5373
GOTERM_BP_DIRECT	GO:0000132~establishment of mitotic spindle orientation	5	0.467727	0.0285704	NDE1, CENPA, GPSM2, NDC80, ZW10	955	21	16792	4.18649	1	0.436828	40.5373
GOTERM_BP_DIRECT	GO:0071466~cellular response to xenobiotic stimulus	3	0.280636	0.0287414	E2F1, MCM7, RB1	955	5	16792	10.5499	1	0.436579	40.7247
GOTERM_BP_DIRECT	GO:1902749~regulation of cell cycle G2/M phase transition	3	0.280636	0.0287414	PAXIP1, PLK1, GTSE1	955	5	16792	10.5499	1	0.436579	40.7247
GOTERM_BP_DIRECT	GO:0009157~deoxyribonucleoside monophosphate biosynthetic process	3	0.280636	0.0287414	TYMS, DCK, TK1	955	5	16792	10.5499	1	0.436579	40.7247
GOTERM_BP_DIRECT	GO:0003231~cardiac ventricle development	3	0.280636	0.0287414	TMEM65, MYOCD, KCNK2	955	5	16792	10.5499	1	0.436579	40.7247
GOTERM_BP_DIRECT	GO:1902966~positive regulation of protein localization to early endosome	3	0.280636	0.0287414	EZR, SORL1, RDX	955	5	16792	10.5499	1	0.436579	40.7247
GOTERM_BP_DIRECT	GO:1903887~motile primary cilium assembly	3	0.280636	0.0287414	MKS1, CC2D2A, CENPJ	955	5	16792	10.5499	1	0.436579	40.7247
GOTERM_BP_DIRECT	GO:0044770~cell cycle phase transition	3	0.280636	0.0287414	CDC7, TIMELESS, TIPIN	955	5	16792	10.5499	1	0.436579	40.7247
GOTERM_BP_DIRECT	GO:0007100~mitotic centrosome separation	3	0.280636	0.0287414	NDE1, KIF11, AURKA	955	5	16792	10.5499	1	0.436579	40.7247
GOTERM_BP_DIRECT	GO:0032876~negative regulation of DNA endoreduplication	3	0.280636	0.0287414	SMC1A, SMC3, MRE11	955	5	16792	10.5499	1	0.436579	40.7247
GOTERM_BP_DIRECT	GO:0000212~meiotic spindle organization	3	0.280636	0.0287414	AURKA, ESPL1, MYH9	955	5	16792	10.5499	1	0.436579	40.7247
GOTERM_BP_DIRECT	GO:0051304~chromosome separation	3	0.280636	0.0287414	TTK, NCAPD3, NCAPD2	955	5	16792	10.5499	1	0.436579	40.7247
GOTERM_BP_DIRECT	GO:0070934~CRD-mediated mRNA stabilization	3	0.280636	0.0287414	DHX9, SYNCRIP, HNRNPU	955	5	16792	10.5499	1	0.436579	40.7247
GOTERM_BP_DIRECT	GO:0045740~positive regulation of DNA replication	7	0.654818	0.0302003	CDK1, DNA2, CACYBP, MAP2K4, CALR, GLI2, GLI1	955	42	16792	2.93054	1	0.450762	42.3012
GOTERM_BP_DIRECT	GO:0009411~response to UV	7	0.654818	0.0302003	MSH6, DTL, POLD1, USP1, TIPIN, RAD18, ZRANB3	955	42	16792	2.93054	1	0.450762	42.3012
GOTERM_BP_DIRECT	GO:0010165~response to X-ray	5	0.467727	0.0333948	XRCC2, BLM, MSH2, BRCA2, RAD51	955	22	16792	3.99619	1	0.482757	45.6162
GOTERM_BP_DIRECT	GO:0030036~actin cytoskeleton organization	14	1.30964	0.0335539	GAS2L3, PDLIM7, NUAK2, WASF1, DIAPH3, FHL3, ARHGEF17, TMSB10, CORO1A, KRAS, TMSB15A, TMSB15B, RHOA, AMOT	955	130	16792	1.89358	1	0.482125	45.7765
GOTERM_BP_DIRECT	GO:0000956~nuclear-transcribed mRNA catabolic process	4	0.374181	0.0340776	EXOSC10, EXOSC9, THRAP3, LSM5	955	13	16792	5.41023	1	0.485235	46.301
GOTERM_BP_DIRECT	GO:0060548~negative regulation of cell death	8	0.748363	0.0352296	PRKD1, SRSF6, CACYBP, SMAD4, RAD18, TEAD2, ZFPM2, HTR2B	955	55	16792	2.55756	1	0.494588	47.438
GOTERM_BP_DIRECT	GO:0034644~cellular response to UV	7	0.654818	0.0369652	KDM1A, USP28, POLD1, RHNO1, PBK, AURKB, CDC25A	955	44	16792	2.79733	1	0.509317	49.1082
GOTERM_BP_DIRECT	GO:0043524~negative regulation of neuron apoptotic process	14	1.30964	0.0373102	KIF14, XRCC2, MSH2, PRKCI, AXL, BIRC5, ITSN1, CORO1A, KDM2B, KRAS, SET, HDAC1, SIX1, ILK	955	132	16792	1.86489	1	0.510349	49.4341
GOTERM_BP_DIRECT	GO:0006334~nucleosome assembly	13	1.21609	0.0379494	HMGB2, HP1BP3, NASP, ANP32E, MCM2, SART3, TSPYL4, SET, CENPA, ANP32A, H3F3B, H2AFX, ASF1B	955	119	16792	1.92086	1	0.514146	50.0328
GOTERM_BP_DIRECT	GO:0072719~cellular response to cisplatin	3	0.280636	0.0415064	TIMELESS, DDX11, RAD51	955	6	16792	8.79162	1	0.544286	53.2442
GOTERM_BP_DIRECT	GO:0006266~DNA ligation	3	0.280636	0.0415064	XRCC6, LIG3, TOP2A	955	6	16792	8.79162	1	0.544286	53.2442
GOTERM_BP_DIRECT	GO:0045143~homologous chromosome segregation	3	0.280636	0.0415064	PLK1, ESPL1, PTTG1	955	6	16792	8.79162	1	0.544286	53.2442
GOTERM_BP_DIRECT	GO:0051096~positive regulation of helicase activity	3	0.280636	0.0415064	MSH6, MSH2, POT1	955	6	16792	8.79162	1	0.544286	53.2442
GOTERM_BP_DIRECT	GO:0010216~maintenance of DNA methylation	3	0.280636	0.0415064	UHRF1, DNMT1, HELLS	955	6	16792	8.79162	1	0.544286	53.2442
GOTERM_BP_DIRECT	GO:0045842~positive regulation of mitotic metaphase/anaphase transition	3	0.280636	0.0415064	DLGAP5, ESPL1, RB1	955	6	16792	8.79162	1	0.544286	53.2442
GOTERM_BP_DIRECT	GO:0006273~lagging strand elongation	3	0.280636	0.0415064	LIG3, POLA1, PARP1	955	6	16792	8.79162	1	0.544286	53.2442
GOTERM_BP_DIRECT	GO:0071035~nuclear polyadenylation-dependent rRNA catabolic process	3	0.280636	0.0415064	EXOSC10, EXOSC8, EXOSC9	955	6	16792	8.79162	1	0.544286	53.2442
GOTERM_BP_DIRECT	GO:0006269~DNA replication, synthesis of RNA primer	3	0.280636	0.0415064	PRIM1, PRIM2, POLA1	955	6	16792	8.79162	1	0.544286	53.2442
GOTERM_BP_DIRECT	GO:0006189~'de novo' IMP biosynthetic process	3	0.280636	0.0415064	ADSL, PAICS, PFAS	955	6	16792	8.79162	1	0.544286	53.2442
GOTERM_BP_DIRECT	GO:0044030~regulation of DNA methylation	4	0.374181	0.041585	MIS18A, EHMT2, PARP1, BRCA1	955	14	16792	5.02378	1	0.54269	53.3129
GOTERM_BP_DIRECT	GO:1901224~positive regulation of NIK/NF-kappaB signaling	4	0.374181	0.041585	HMGB1, NOD1, ACTN4, CALR	955	14	16792	5.02378	1	0.54269	53.3129
GOTERM_BP_DIRECT	GO:0006357~regulation of transcription from RNA polymerase II promoter	35	3.27409	0.0435328	ENY2, TSHZ3, HMGB1, HMGB2, FOSL2, ZNF367, DEK, TADA1, MED22, MED20, KDM1A, RAD21, HNRNPK, SMARCB1, TEAD4, SMARCD1, ACTL6A, FOXD2, TFDP1, KLF12, ZMYM4, NUCKS1, CREB1, RBL1, BRIP1, MED14, RB1, TEAD3, MED13L, BRCA1, SMARCE1, CKS2, ID4, TCF19, TCF12	955	441	16792	1.3955	1	0.557219	54.9855
GOTERM_BP_DIRECT	GO:0007265~Ras protein signal transduction	9	0.841908	0.0442985	PRKD1, NRAS, USP28, KRAS, TRIM28, IQGAP3, DNMT1, RB1, CCNA2	955	70	16792	2.2607	1	0.56138	55.6274
GOTERM_BP_DIRECT	GO:0060271~cilium morphogenesis	14	1.30964	0.0457018	IQCB1, SCLT1, MKS1, ICK, KIF24, IFT122, CEP162, CEP89, CC2D2A, DZIP1L, CEP41, FAM161A, ASAP1, FLNA	955	136	16792	1.81004	1	0.570671	56.7814
GOTERM_BP_DIRECT	GO:0045190~isotype switching	4	0.374181	0.0498471	EXO1, MSH6, MSH2, MLH1	955	15	16792	4.68887	1	0.600874	60.0271
GOTERM_BP_DIRECT	GO:0009165~nucleotide biosynthetic process	4	0.374181	0.0498471	DHFR, DCK, PRPS2, TK1	955	15	16792	4.68887	1	0.600874	60.0271
GOTERM_BP_DIRECT	GO:2000134~negative regulation of G1/S transition of mitotic cell cycle	5	0.467727	0.0505447	JADE1, EZH2, CTDSP2, RB1, SLFN11	955	25	16792	3.51665	1	0.603833	60.5501
GOTERM_BP_DIRECT	GO:0007569~cell aging	5	0.467727	0.0505447	CDK1, NUP62, ILK, BRCA2, WRN	955	25	16792	3.51665	1	0.603833	60.5501
GOTERM_BP_DIRECT	GO:0042787~protein ubiquitination involved in ubiquitin-dependent protein catabolic process	15	1.40318	0.0531467	CDK1, DZIP3, CDC23, CDC20, AURKA, PTTG1, AURKB, UBE2C, CCNB1, UHRF1, MAD2L1, CUL4A, PLK1, BUB1B, BUB3	955	153	16792	1.72385	1	0.620511	62.4446
GOTERM_BP_DIRECT	GO:0006366~transcription from RNA polymerase II promoter	39	3.64827	0.0558851	NCBP1, NMI, ELF4, FOXM1, TAF9B, ZNF639, NFIX, DEK, PTTG1, GLI2, MYBL2, MED20, FUBP1, RAD21, HNRNPK, TCERG1, MEIS2, MYOCD, ASH2L, CREB3L1, CREB3L4, MYB, STAG1, TRIP13, SSBP2, FOXJ2, NUCKS1, CREB1, SMAD4, NPAS4, PMF1, RBMX, SIX1, SUPT16H, PBX1, TGFB1I1, PARP1, NCOR1, TCF12	955	513	16792	1.33674	1	0.637269	64.3454
GOTERM_BP_DIRECT	GO:0009913~epidermal cell differentiation	3	0.280636	0.0559557	HDAC1, GLI2, GLI1	955	7	16792	7.53568	1	0.635511	64.3932
GOTERM_BP_DIRECT	GO:2000617~positive regulation of histone H3-K9 acetylation	3	0.280636	0.0559557	SMARCB1, SMAD4, BRCA1	955	7	16792	7.53568	1	0.635511	64.3932
GOTERM_BP_DIRECT	GO:0036089~cleavage furrow formation	3	0.280636	0.0559557	SNX18, RHOA, AURKB	955	7	16792	7.53568	1	0.635511	64.3932
GOTERM_BP_DIRECT	GO:0060831~smoothened signaling pathway involved in dorsal/ventral neural tube patterning	3	0.280636	0.0559557	TULP3, IFT122, GLI2	955	7	16792	7.53568	1	0.635511	64.3932
GOTERM_BP_DIRECT	GO:0090267~positive regulation of mitotic cell cycle spindle assembly checkpoint	3	0.280636	0.0559557	MAD2L1, GEN1, NDC80	955	7	16792	7.53568	1	0.635511	64.3932
GOTERM_BP_DIRECT	GO:0006259~DNA metabolic process	5	0.467727	0.0571517	MKI67, LIG1, TOPBP1, WRN, TK1	955	26	16792	3.38139	1	0.641298	65.1935
GOTERM_BP_DIRECT	GO:0007050~cell cycle arrest	14	1.30964	0.0579284	KMT2E, KHDRBS1, MSH2, RB1, CALR, CDKN3, EIF4G2, CUL4A, CDKN2C, ILK, MTBP, KIF20B, DDIAS, BARD1	955	141	16792	1.74585	1	0.644204	65.7042
GOTERM_BP_DIRECT	GO:1903506~regulation of nucleic acid-templated transcription	4	0.374181	0.05884	NMI, ACTN4, PSMC3IP, TRIP13	955	16	16792	4.39581	1	0.647925	66.2945
GOTERM_BP_DIRECT	GO:0000712~resolution of meiotic recombination intermediates	4	0.374181	0.05884	EME1, MLH1, TOP2B, TOP2A	955	16	16792	4.39581	1	0.647925	66.2945
GOTERM_BP_DIRECT	GO:0007405~neuroblast proliferation	4	0.374181	0.05884	NDE1, ID4, HHIP, RACGAP1	955	16	16792	4.39581	1	0.647925	66.2945
GOTERM_BP_DIRECT	GO:0007099~centriole replication	4	0.374181	0.05884	PLK4, WDR62, CEP152, CENPJ	955	16	16792	4.39581	1	0.647925	66.2945
GOTERM_BP_DIRECT	GO:0045814~negative regulation of gene expression, epigenetic	7	0.654818	0.0627343	PHF19, RBBP4, EZH2, DNMT1, H3F3B, RBBP7, DNMT3B	955	50	16792	2.46165	1	0.670009	68.7098
GOTERM_BP_DIRECT	GO:0019827~stem cell population maintenance	7	0.654818	0.0627343	PHF19, RIF1, MED12, MED14, SMC1A, TET1, SMC3	955	50	16792	2.46165	1	0.670009	68.7098
GOTERM_BP_DIRECT	GO:0001701~in utero embryonic development	17	1.59027	0.0669481	SRSF1, STIL, XRCC2, MSH2, COPS3, C5, SMAD4, GLI2, MYH9, RNASEH2B, CCNB1, KDM1A, CCNB2, CUL4A, AMOT, ZFPM2, MYH10	955	187	16792	1.59848	1	0.692359	71.1388
GOTERM_BP_DIRECT	GO:0007223~Wnt signaling pathway, calcium modulating pathway	6	0.561272	0.0682247	MOV10, TNRC6C, ROR2, CALM3, PLCB1, TNRC6A	955	39	16792	2.70511	1	0.697321	71.8388
GOTERM_BP_DIRECT	GO:0006376~mRNA splice site selection	4	0.374181	0.0685349	SRSF1, SRSF10, SRSF6, RBMX	955	17	16792	4.13723	1	0.696912	72.0065
GOTERM_BP_DIRECT	GO:0007276~gamete generation	4	0.374181	0.0685349	FANCL, SPIN1, FANCD2, SPIN4	955	17	16792	4.13723	1	0.696912	72.0065
GOTERM_BP_DIRECT	GO:0007286~spermatid development	9	0.841908	0.0702817	CEP57, ALMS1, QKI, ODF2, H3F3B, FANCG, EHMT2, DMC1, TRIP13	955	77	16792	2.05518	1	0.704242	72.9331
GOTERM_BP_DIRECT	GO:0043388~positive regulation of DNA binding	5	0.467727	0.0716744	HMGB1, HMGB2, MYOCD, TRIM28, CALM3	955	28	16792	3.13987	1	0.709492	73.651
GOTERM_BP_DIRECT	GO:2000643~positive regulation of early endosome to late endosome transport	3	0.280636	0.0718571	MTMR2, EZR, RDX	955	8	16792	6.59372	1	0.708383	73.7439
GOTERM_BP_DIRECT	GO:0051315~attachment of mitotic spindle microtubules to kinetochore	3	0.280636	0.0718571	KIF2C, CENPE, NDC80	955	8	16792	6.59372	1	0.708383	73.7439
GOTERM_BP_DIRECT	GO:0085020~protein K6-linked ubiquitination	3	0.280636	0.0718571	BRCA1, UBE2T, BARD1	955	8	16792	6.59372	1	0.708383	73.7439
GOTERM_BP_DIRECT	GO:0000467~exonucleolytic trimming to generate mature 3'-end of 5.8S rRNA from tricistronic rRNA transcript (SSU-rRNA, 5.8S rRNA, LSU-rRNA)	3	0.280636	0.0718571	EXOSC8, EXOSC9, ERI2	955	8	16792	6.59372	1	0.708383	73.7439
GOTERM_BP_DIRECT	GO:0045184~establishment of protein localization	6	0.561272	0.0744995	KIF14, PLK1, RDX, CEP55, KPNB1, FLNA	955	40	16792	2.63749	1	0.719775	75.0526
GOTERM_BP_DIRECT	GO:0046655~folic acid metabolic process	4	0.374181	0.0788997	MTHFD1, SHMT1, DHFR, MTHFD1L	955	18	16792	3.90739	1	0.738897	77.0961
GOTERM_BP_DIRECT	GO:0036120~cellular response to platelet-derived growth factor stimulus	4	0.374181	0.0788997	CREB1, PDGFRB, RDX, CCNA2	955	18	16792	3.90739	1	0.738897	77.0961
GOTERM_BP_DIRECT	GO:0051170~nuclear import	4	0.374181	0.0788997	GEMIN2, SNRPD1, SNRPF, HNRNPA1	955	18	16792	3.90739	1	0.738897	77.0961
GOTERM_BP_DIRECT	GO:0097421~liver regeneration	5	0.467727	0.0795742	SRSF1, TYMS, EZH2, AURKA, GLI1	955	29	16792	3.03159	1	0.740032	77.395
GOTERM_BP_DIRECT	GO:0006289~nucleotide-excision repair	6	0.561272	0.0810766	RAD51D, RPA1, NEIL3, BRCA2, FANCC, RPA3	955	41	16792	2.57316	1	0.744891	78.0477
GOTERM_BP_DIRECT	GO:0030521~androgen receptor signaling pathway	6	0.561272	0.0810766	THRAP3, MED12, MED14, TGFB1I1, RB1, BRCA1	955	41	16792	2.57316	1	0.744891	78.0477
GOTERM_BP_DIRECT	GO:0048146~positive regulation of fibroblast proliferation	7	0.654818	0.0845898	CCNB1, E2F1, CDC6, FOSL2, PDGFRB, CCNA2, RNASEH2B	955	54	16792	2.27931	1	0.758291	79.505
GOTERM_BP_DIRECT	GO:0008584~male gonad development	10	0.935454	0.0858734	HMGB2, NUDT1, MSH2, NASP, ARID5B, RRM1, H3F3B, PATZ1, FANCA, ASPM	955	94	16792	1.87056	1	0.761788	80.0143
GOTERM_BP_DIRECT	GO:0034504~protein localization to nucleus	5	0.467727	0.0878861	XPO1, SYNE2, SIX1, LMNA, CALR	955	30	16792	2.93054	1	0.768167	80.7889
GOTERM_BP_DIRECT	GO:0045773~positive regulation of axon extension	5	0.467727	0.0878861	EIF4G2, TRPC5, ILK, CDH4, CDKL5	955	30	16792	2.93054	1	0.768167	80.7889
GOTERM_BP_DIRECT	GO:0040019~positive regulation of embryonic development	3	0.280636	0.0889993	AMOT, PLCB1, NR2C2	955	9	16792	5.86108	1	0.770774	81.2051
GOTERM_BP_DIRECT	GO:0031053~primary miRNA processing	3	0.280636	0.0889993	DROSHA, DGCR8, HNRNPA2B1	955	9	16792	5.86108	1	0.770774	81.2051
GOTERM_BP_DIRECT	GO:0071028~nuclear mRNA surveillance	3	0.280636	0.0889993	EXOSC10, EXOSC8, EXOSC9	955	9	16792	5.86108	1	0.770774	81.2051
GOTERM_BP_DIRECT	GO:0010389~regulation of G2/M transition of mitotic cell cycle	3	0.280636	0.0889993	KIF14, CENPF, RNASEH2B	955	9	16792	5.86108	1	0.770774	81.2051
GOTERM_BP_DIRECT	GO:0035563~positive regulation of chromatin binding	3	0.280636	0.0889993	KDM1A, DDX11, KDM4D	955	9	16792	5.86108	1	0.770774	81.2051
GOTERM_BP_DIRECT	GO:0000733~DNA strand renaturation	3	0.280636	0.0889993	BLM, ZRANB3, RAD54L	955	9	16792	5.86108	1	0.770774	81.2051
GOTERM_BP_DIRECT	GO:1904668~positive regulation of ubiquitin protein ligase activity	3	0.280636	0.0889993	PLK1, CDC20, UBE2C	955	9	16792	5.86108	1	0.770774	81.2051
GOTERM_BP_DIRECT	GO:0043536~positive regulation of blood vessel endothelial cell migration	4	0.374181	0.0898989	PRKCA, PRKD1, AMOT, AMOTL1	955	19	16792	3.70174	1	0.772492	81.5351
GOTERM_BP_DIRECT	GO:0045879~negative regulation of smoothened signaling pathway	4	0.374181	0.0898989	TULP3, IFT122, HHIP, RB1	955	19	16792	3.70174	1	0.772492	81.5351
GOTERM_BP_DIRECT	GO:0090502~RNA phosphodiester bond hydrolysis, endonucleolytic	7	0.654818	0.0906339	EXO1, DROSHA, DGCR8, RNASEH2A, RNASEH2B, FEN1, TSEN15	955	55	16792	2.23787	1	0.773543	81.8007
GOTERM_BP_DIRECT	GO:0006367~transcription initiation from RNA polymerase II promoter	14	1.30964	0.0920826	E2F2, TAF9B, TRIM28, MED12, NR2C2AP, TEAD1, TEAD2, MED14, TEAD3, MED20, NR2C2, THRAP3, TEAD4, NR2F1	955	152	16792	1.61951	1	0.777317	82.3137
GOTERM_BP_DIRECT	GO:0008543~fibroblast growth factor receptor signaling pathway	9	0.841908	0.093544	NCBP1, RBFOX2, HNRNPM, CEP57, HNRNPF, PTBP1, HNRNPH1, HNRNPA1, SHCBP1	955	82	16792	1.92987	1	0.781044	82.8174
GOTERM_BP_DIRECT	GO:0006325~chromatin organization	6	0.561272	0.0951201	NUP133, HMGB2, HDAC1, NUCKS1, EZH2, ATAD2	955	43	16792	2.45348	1	0.785099	83.3453
GOTERM_BP_DIRECT	GO:0043966~histone H3 acetylation	6	0.561272	0.0951201	JADE1, KAT7, WDR5, TAF9B, BRCA2, TADA1	955	43	16792	2.45348	1	0.785099	83.3453
GOTERM_BP_DIRECT	GO:0007224~smoothened signaling pathway	8	0.748363	0.0959533	STIL, GPC2, CC2D2A, ROR2, HHIP, GLI2, CENPJ, GLI1	955	69	16792	2.03864	1	0.786376	83.6182
GOTERM_BP_DIRECT	GO:0042733~embryonic digit morphogenesis	7	0.654818	0.0969058	MKS1, TULP3, IFT122, HDAC1, SMAD4, ROR2, GLI2	955	56	16792	2.19791	1	0.788061	83.925
# up-regulated genes enriched BP GOs, results from DAVID
Category	Term	Count	%	PValue	Genes	List Total	Pop Hits	Pop Total	Fold Enrichment	Bonferroni	Benjamini	FDR
GOTERM_BP_DIRECT	GO:0015992~proton transport	17	1.57993	1.28488e-09	SLC2A13, ATP6V0E1, MFSD3, SLC33A1, ATP6AP1, ATP6V1B2, ATP6V1D, ATP6V0B, ATP6V1F, SLC2A8, ATP6V1C1, SLC2A6, SLC17A5, SLC4A11, ATP6V1E1, SLC15A4, ATP6V0D1	859	49	16792	6.78207	3.65419e-06	3.65419e-06	2.29989e-06
GOTERM_BP_DIRECT	GO:0033572~transferrin transport	14	1.30112	7.65533e-09	ATP6V0E1, ATP6AP1, ATP6V1H, ATP6V1B2, ATP6V1G1, ATP6V1D, ATP6V0B, ATP6V1F, SLC11A2, ATP6V1C1, ATP6V1E1, ATP6V0A1, ATP6V0D1, ATP6V0D2	859	35	16792	7.81932	2.17715e-05	1.08858e-05	1.37028e-05
GOTERM_BP_DIRECT	GO:0090383~phagosome acidification	12	1.11524	3.56846e-08	ATP6V1C1, ATP6V0E1, ATP6V1E1, ATP6V0A1, ATP6V1H, ATP6V1B2, ATP6V1G1, ATP6V0D1, ATP6V0D2, ATP6V1D, ATP6V0B, ATP6V1F	859	27	16792	8.68814	0.000101482	3.38284e-05	6.38741e-05
GOTERM_BP_DIRECT	GO:0016241~regulation of macroautophagy	13	1.20818	1.35903e-06	ATP6V1C1, ATP6V0E1, ATP6V1E1, ERN1, ATP6V0A1, ATP6V1H, ATP6V1G1, ATP6V1B2, ATP6V0D1, ATP6V0D2, ATP6V1D, ATP6V0B, GBA	859	44	16792	5.77564	0.00385764	0.000965807	0.00243259
GOTERM_BP_DIRECT	GO:0008286~insulin receptor signaling pathway	17	1.57993	1.63756e-06	ATP6V0E1, GRB2, ATP6AP1, BAIAP2, ATP6V1H, ATP6V1B2, ATP6V1G1, ATP6V1D, ATP6V0B, ATP6V1F, SLC2A8, ATP6V1C1, ATP6V1E1, ATP6V0A1, IGFBP1, ATP6V0D1, ATP6V0D2	859	78	16792	4.26053	0.0046464	0.000931013	0.00293114
GOTERM_BP_DIRECT	GO:0015991~ATP hydrolysis coupled proton transport	11	1.0223	2.65619e-06	ATP6V1C1, ATP6V0E1, ATP6AP1, ATP6V1E1, ATP6V0A1, ATP6V1H, ATP6V1B2, ATP6V0D1, ATP6V0D2, ATP6V0B, ATP6V1F	859	32	16792	6.71973	0.00752576	0.00125824	0.00475438
GOTERM_BP_DIRECT	GO:0006914~autophagy	21	1.95167	1.35395e-05	TM9SF1, GABARAPL2, VPS18, NRBF2, PLEKHM1, TOLLIP, TSG101, TMBIM6, UVRAG, PHF23, SESN2, MAP1LC3B, SQSTM1, ATG4A, ULK3, ATG2A, RAB24, CTSD, HAP1, WDR45, TIGAR	859	133	16792	3.08658	0.0377747	0.00548584	0.0242324
GOTERM_BP_DIRECT	GO:0030216~keratinocyte differentiation	14	1.30112	0.000113364	MAP2K1, LCE3A, TSG101, LCE3D, LCE2C, LCE2B, LCE2A, STK4, LCE1F, SPRR2D, SPRR2A, ST14, LCE2D, IVL	859	76	16792	3.601	0.275611	0.0395019	0.202724
GOTERM_BP_DIRECT	GO:0007035~vacuolar acidification	6	0.557621	0.000468078	ATP6V0E1, ATP6V0A1, ATP6V1H, ATP6V0D1, ATP6V0D2, ATP6V0B	859	14	16792	8.37785	0.735926	0.137523	0.834537
GOTERM_BP_DIRECT	GO:0035434~copper ion transmembrane transport	4	0.371747	0.000511516	SLC11A2, ATOX1, SLC31A2, SLC31A1	859	4	16792	19.5483	0.766629	0.135421	0.911649
GOTERM_BP_DIRECT	GO:0031424~keratinization	10	0.929368	0.000632005	LCE3A, SPRR2D, LCE1F, SPRR2A, LCE3D, LCE2C, LCE2D, LCE2B, LCE2A, IVL	859	48	16792	4.07256	0.834369	0.150794	1.12525
GOTERM_BP_DIRECT	GO:0006825~copper ion transport	6	0.557621	0.000672723	SLC11A2, ATOX1, HEPHL1, SLC31A2, SLC31A1, COX17	859	15	16792	7.81932	0.852491	0.147421	1.19733
GOTERM_BP_DIRECT	GO:0018149~peptide cross-linking	10	0.929368	0.000861772	LCE3A, SPRR2D, LCE1F, SPRR2A, LCE3D, LCE2C, LCE2D, LCE2B, LCE2A, IVL	859	50	16792	3.90966	0.913873	0.171891	1.53136
GOTERM_BP_DIRECT	GO:0000045~autophagosome assembly	9	0.836431	0.000955015	GABARAPL2, PSEN1, MAP1LC3B, ATG4A, ATG2A, KIAA1324, ATG16L1, WIPI2, WDR45	859	41	16792	4.29109	0.933951	0.176422	1.69572
GOTERM_BP_DIRECT	GO:0006919~activation of cysteine-type endopeptidase activity involved in apoptotic process	13	1.20818	0.00100067	TNFRSF10A, SLC11A2, XDH, RET, TNFRSF10B, BBC3, ACER2, TNFSF15, NKX3-1, FAM162A, NLRP3, PDCD6, DNAJA3	859	83	16792	3.06178	0.942001	0.172894	1.7761
GOTERM_BP_DIRECT	GO:0034220~ion transmembrane transport	23	2.13755	0.00113036	ATP6V0E1, GLRB, CLCN2, ATP6AP1, SFXN4, ATP6V1H, OSTM1, ATP6V1G1, ATP6V1B2, ATP6V1D, TPCN1, ATP6V0B, KCNK3, ATP6V1F, ATP6V1C1, ATP6V1E1, RYR1, DLG4, ATP6V0A1, SLC9B2, ATP6V0D1, CLCN7, ATP6V0D2	859	210	16792	2.14101	0.959907	0.182116	2.00409
GOTERM_BP_DIRECT	GO:0009313~oligosaccharide catabolic process	5	0.464684	0.00167316	GM2A, HEXB, NEU1, MAN2B1, CTBS	859	11	16792	8.8856	0.991455	0.244325	2.95293
GOTERM_BP_DIRECT	GO:0000422~mitophagy	7	0.650558	0.00796236	FUNDC2, GABARAPL2, SQSTM1, ATG4A, ATG2A, WIPI2, WDR45	859	35	16792	3.90966	1	0.717221	13.3327
GOTERM_BP_DIRECT	GO:0007265~Ras protein signal transduction	10	0.929368	0.00903615	PLD1, CDKN1A, GRB2, JUN, MAPK11, SHC2, NTN1, BRAP, RALGDS, RGL2	859	70	16792	2.79262	1	0.74301	14.9966
GOTERM_BP_DIRECT	GO:0010629~negative regulation of gene expression	15	1.39405	0.010384	HAVCR2, XDH, CCL3, MAP2K1, CCR1, GPER1, PTRH2, ACVR1B, MAX, BBS2, CDKN1A, FYN, HINFP, NKX3-1, GBA	859	137	16792	2.14033	1	0.773345	17.0425
GOTERM_BP_DIRECT	GO:0015031~protein transport	32	2.97398	0.0118959	SNAP29, RAB9A, CHMP5, PLEKHM1, TSG101, AP1AR, CHMP7, TMED4, RAB24, NECAP1, RAB6B, HAP1, GABARAPL2, PGAP2, TIMM10B, RILP, SCAMP3, CUBN, RABIF, RHBDF1, RUFY1, SPIRE1, TMEM115, PSEN1, RAB36, ARRB1, ATG4A, RAB22A, MCFD2, SLC15A4, ATG16L1, SERP2	859	395	16792	1.58366	1	0.802241	19.2821
GOTERM_BP_DIRECT	GO:0008625~extrinsic apoptotic signaling pathway via death domain receptors	7	0.650558	0.0119004	TNFRSF10A, MOAP1, TNFRSF10C, TNFRSF10B, BLOC1S2, TNFRSF10D, DEDD2	859	38	16792	3.601	1	0.787248	19.2886
GOTERM_BP_DIRECT	GO:0006811~ion transport	14	1.30112	0.0130578	SLC8A3, SLC36A1, GLRB, SLC9A7, SLCO4A1, SLC22A15, SLCO2B1, SLC26A2, TMEM63B, SLC17A5, SLC24A4, CTNS, SLC15A4, SLC9A1	859	127	16792	2.15493	1	0.803138	20.9641
GOTERM_BP_DIRECT	GO:0046323~glucose import	4	0.371747	0.0206808	SLC2A8, SLC2A13, SLC2A6, SESN2	859	12	16792	6.5161	1	0.915952	31.2065
GOTERM_BP_DIRECT	GO:0007093~mitotic cell cycle checkpoint	6	0.557621	0.0220095	MAD2L1BP, PLK3, CDKN2B, HUS1, BCL2L1, WNT9A	859	32	16792	3.66531	1	0.920481	32.8581
GOTERM_BP_DIRECT	GO:0050900~leukocyte migration	13	1.20818	0.0221596	F11R, ICAM1, BSG, GRB2, MMP9, ITGB2, SLC7A7, PROCR, ITGAX, FYN, CD58, PECAM1, TREM1	859	122	16792	2.08302	1	0.913808	33.0423
GOTERM_BP_DIRECT	GO:1903874~ferrous iron transmembrane transport	3	0.27881	0.0235199	SLC11A2, SLC25A37, SLC25A28	859	5	16792	11.729	1	0.91849	34.6902
GOTERM_BP_DIRECT	GO:0006003~fructose 2,6-bisphosphate metabolic process	3	0.27881	0.0235199	PFKFB4, PFKFB2, TIGAR	859	5	16792	11.729	1	0.91849	34.6902
GOTERM_BP_DIRECT	GO:0070059~intrinsic apoptotic signaling pathway in response to endoplasmic reticulum stress	6	0.557621	0.024882	TNFRSF10B, BBC3, TMBIM6, ERN1, BRSK2, DDIT3	859	33	16792	3.55424	1	0.922639	36.3017
GOTERM_BP_DIRECT	GO:0042981~regulation of apoptotic process	19	1.7658	0.0252402	NOL3, SRA1, BEX2, PRDX2, BCL2L1, ALK, RABGGTA, TNFRSF10A, RASSF3, TRIAP1, TNFRSF10C, NME3, TNFRSF10B, CASP9, TNFRSF10D, BBC3, FYN, GDF15, DEDD2	859	213	16792	1.74375	1	0.918492	36.7193
GOTERM_BP_DIRECT	GO:0006687~glycosphingolipid metabolic process	7	0.650558	0.0260186	GM2A, ARSG, PSAP, HEXB, NEU1, GLB1, GBA	859	45	16792	3.04085	1	0.917851	37.6178
GOTERM_BP_DIRECT	GO:0030207~chondroitin sulfate catabolic process	4	0.371747	0.0317179	IDS, HEXB, BCAN, IDUA	859	14	16792	5.58523	1	0.948026	43.8385
GOTERM_BP_DIRECT	GO:0045880~positive regulation of smoothened signaling pathway	5	0.464684	0.0318062	EVC, ULK3, DCDC2, WNT9A, SHH	859	24	16792	4.07256	1	0.943454	43.93
GOTERM_BP_DIRECT	GO:0048870~cell motility	5	0.464684	0.0318062	PLD1, SRPX2, MAP2K1, BRK1, GAS8	859	24	16792	4.07256	1	0.943454	43.93
GOTERM_BP_DIRECT	GO:0018230~peptidyl-L-cysteine S-palmitoylation	3	0.27881	0.0340966	GOLGA7, GOLGA7B, ZDHHC9	859	6	16792	9.77416	1	0.949701	46.2574
GOTERM_BP_DIRECT	GO:0006689~ganglioside catabolic process	3	0.27881	0.0340966	GM2A, HEXB, NEU1	859	6	16792	9.77416	1	0.949701	46.2574
GOTERM_BP_DIRECT	GO:0034976~response to endoplasmic reticulum stress	9	0.836431	0.0371376	TNFRSF10B, DDRGK1, NRBF2, TMEM33, BBC3, TMX4, ERN1, TMEM259, DDIT3	859	75	16792	2.3458	1	0.957811	49.2068
GOTERM_BP_DIRECT	GO:0006612~protein targeting to membrane	5	0.464684	0.0413158	GOLGA7, TAOK2, GOLGA7B, ATG4A, ARL6	859	26	16792	3.75929	1	0.967565	53.0107
GOTERM_BP_DIRECT	GO:0008089~anterograde axonal transport	5	0.464684	0.0413158	SPG7, KIF3B, BLOC1S2, NEFL, HAP1	859	26	16792	3.75929	1	0.967565	53.0107
GOTERM_BP_DIRECT	GO:0055085~transmembrane transport	20	1.85874	0.0450152	MFSD3, SLC33A1, SLC22A15, SLC6A13, SLC6A4, ABCA2, ABCA4, SLC10A3, ANKH, ABCA3, AZGP1, SLC17A5, MRS2, SLC16A6, TAP1, SLC25A19, SLC25A44, SLC25A45, SLC15A4, CTNS	859	244	16792	1.60232	1	0.973714	56.1526
GOTERM_BP_DIRECT	GO:0007220~Notch receptor processing	4	0.371747	0.0452528	PSEN1, PSEN2, JAG2, PSENEN	859	16	16792	4.88708	1	0.971547	56.3475
GOTERM_BP_DIRECT	GO:2000117~negative regulation of cysteine-type endopeptidase activity	4	0.371747	0.0452528	CST4, CST3, CST2, CST1	859	16	16792	4.88708	1	0.971547	56.3475
GOTERM_BP_DIRECT	GO:0006885~regulation of pH	4	0.371747	0.0452528	CLCN3, SLC9A7, RHCG, SLC9A1	859	16	16792	4.88708	1	0.971547	56.3475
GOTERM_BP_DIRECT	GO:0044804~nucleophagy	4	0.371747	0.0452528	ATG4A, ATG2A, WIPI2, WDR45	859	16	16792	4.88708	1	0.971547	56.3475
GOTERM_BP_DIRECT	GO:0060576~intestinal epithelial cell development	3	0.27881	0.0461413	YIPF6, PRDM1, TIGAR	859	7	16792	8.37785	1	0.970856	57.0689
GOTERM_BP_DIRECT	GO:0014808~release of sequestered calcium ion into cytosol by sarcoplasmic reticulum	3	0.27881	0.0461413	CCL3, NOL3, RYR1	859	7	16792	8.37785	1	0.970856	57.0689
GOTERM_BP_DIRECT	GO:0043280~positive regulation of cysteine-type endopeptidase activity involved in apoptotic process	6	0.557621	0.051645	ARRB1, NKX3-1, GPER1, NLRP3, PDCD6, BCAP31	859	40	16792	2.93225	1	0.979076	61.2932
GOTERM_BP_DIRECT	GO:0090200~positive regulation of release of cytochrome c from mitochondria	5	0.464684	0.0522618	MOAP1, BBC3, MMP9, FAM162A, GPER1	859	28	16792	3.49077	1	0.977994	61.7413
GOTERM_BP_DIRECT	GO:0071310~cellular response to organic substance	4	0.371747	0.0529259	SYP, EGR2, PSAP, TBX21	859	17	16792	4.5996	1	0.976993	62.2183
GOTERM_BP_DIRECT	GO:0032526~response to retinoic acid	6	0.557621	0.0564512	SCAMP3, SP100, DNAAF2, IGF2R, ACER2, SLC10A3	859	41	16792	2.86073	1	0.980448	64.658
GOTERM_BP_DIRECT	GO:0042987~amyloid precursor protein catabolic process	3	0.27881	0.0594768	PSEN1, PSEN2, PSENEN	859	8	16792	7.33062	1	0.982675	66.6325
GOTERM_BP_DIRECT	GO:0032049~cardiolipin biosynthetic process	3	0.27881	0.0594768	PGS1, PLD6, PTPMT1	859	8	16792	7.33062	1	0.982675	66.6325
GOTERM_BP_DIRECT	GO:0034383~low-density lipoprotein particle clearance	3	0.27881	0.0594768	CD36, DGAT2, SCARB1	859	8	16792	7.33062	1	0.982675	66.6325
GOTERM_BP_DIRECT	GO:0006486~protein glycosylation	11	1.0223	0.0634391	TMEM115, POMGNT1, ST6GALNAC4, B4GAT1, PSEN1, ST8SIA5, DAD1, SRD5A3, SERP2, GALNT9, SDF2	859	113	16792	1.90293	1	0.985539	69.0611
GOTERM_BP_DIRECT	GO:2000379~positive regulation of reactive oxygen species metabolic process	5	0.464684	0.0646296	XDH, CDKN1A, CD36, GRB2, ACOD1	859	30	16792	3.25805	1	0.985339	69.7575
GOTERM_BP_DIRECT	GO:0006974~cellular response to DNA damage stimulus	17	1.57993	0.0675979	MICA, TAOK2, HUS1, ZBTB40, BRSK1, DDIT3, CCND1, CDKN1A, PLK3, CASP9, PSEN1, BTG2, BBC3, SPATA18, SUSD6, FBXO31, TIGAR	859	208	16792	1.5977	1	0.986797	71.4301
GOTERM_BP_DIRECT	GO:0045862~positive regulation of proteolysis	4	0.371747	0.06999	TBC1D10A, BTRC, CYFIP2, FBXW11	859	19	16792	4.11543	1	0.987607	72.714
GOTERM_BP_DIRECT	GO:0050665~hydrogen peroxide biosynthetic process	3	0.27881	0.0739402	CYBA, CYP1A1, SOD2	859	9	16792	6.5161	1	0.989447	74.7157
GOTERM_BP_DIRECT	GO:0071340~skeletal muscle acetylcholine-gated channel clustering	3	0.27881	0.0739402	FNTA, RER1, DNAJA3	859	9	16792	6.5161	1	0.989447	74.7157
GOTERM_BP_DIRECT	GO:0051259~protein oligomerization	7	0.650558	0.074667	HGSNAT, HACL1, NOL3, SLC6A4, DPAGT1, NLRP3, SLC9A1	859	58	16792	2.35928	1	0.988936	75.0686
GOTERM_BP_DIRECT	GO:0006954~inflammatory response	27	2.50929	0.0781922	TUSC2, CCL3, TOLLIP, C3, CCR1, TAC1, ITGB2, CCL4, CCL20, CXCR4, CYP26B1, NRROS, TNIP1, HAVCR2, F11R, ADGRE2, SP100, GPER1, NLRP3, TNFRSF10A, CYBA, TNFRSF10C, TNFRSF10B, TNFRSF10D, IL36B, PLA2G4C, ACOD1	859	379	16792	1.39262	1	0.990256	76.715
GOTERM_BP_DIRECT	GO:0006810~transport	25	2.32342	0.0839451	CLCN3, CLCN2, SLC33A1, SLC6A12, ABCA2, ENSA, SEC14L4, ABCA4, SLC19A2, ABCA3, OSCP1, SLC7A7, P2RX5, SLC25A20, TMED4, LAPTM5, SLC6A8, SLC25A28, SLC25A37, SLC25A19, PAEP, SLC25A45, SLC35F5, CNIH1, CLCN7	859	348	16792	1.40433	1	0.992474	79.1835
GOTERM_BP_DIRECT	GO:0045861~negative regulation of proteolysis	4	0.371747	0.0891907	CST4, CST3, SERPINB3, CLN8	859	21	16792	3.72349	1	0.993961	81.217
GOTERM_BP_DIRECT	GO:1902237~positive regulation of endoplasmic reticulum stress-induced intrinsic apoptotic signaling pathway	3	0.27881	0.0893816	SERINC3, BBC3, DDIT3	859	10	16792	5.86449	1	0.993424	81.2873
GOTERM_BP_DIRECT	GO:0090501~RNA phosphodiester bond hydrolysis	3	0.27881	0.0893816	AZGP1, SMG5, RNASE7	859	10	16792	5.86449	1	0.993424	81.2873
GOTERM_BP_DIRECT	GO:1902600~hydrogen ion transmembrane transport	7	0.650558	0.0903742	SLC11A2, C15ORF48, SLC36A1, SLC9A7, SLC9B2, ATP6V1G1, SLC9A1	859	61	16792	2.24325	1	0.993185	81.6491
GOTERM_BP_DIRECT	GO:0006869~lipid transport	8	0.743494	0.0929212	STARD3, OSBP2, LRP10, GM2A, PSAP, ABCA4, CLN8, ABCA3	859	76	16792	2.05772	1	0.993546	82.5474
GOTERM_BP_DIRECT	GO:0022617~extracellular matrix disassembly	8	0.743494	0.0929212	BSG, MMP9, BCAN, LAMC2, CTSS, KIF9, MMP12, LCP1	859	76	16792	2.05772	1	0.993546	82.5474
GOTERM_BP_DIRECT	GO:0018117~protein adenylylation	2	0.185874	0.0995836	FICD, MOCS3	859	2	16792	19.5483	1	0.995143	84.7049
GOTERM_BP_DIRECT	GO:1901264~carbohydrate derivative transport	2	0.185874	0.0995836	SLC17A5, SLC35E3	859	2	16792	19.5483	1	0.995143	84.7049
GOTERM_BP_DIRECT	GO:0006423~cysteinyl-tRNA aminoacylation	2	0.185874	0.0995836	CARS, CARS2	859	2	16792	19.5483	1	0.995143	84.7049
GOTERM_BP_DIRECT	GO:0021903~rostrocaudal neural tube patterning	2	0.185874	0.0995836	ATP6AP2, SOX17	859	2	16792	19.5483	1	0.995143	84.7049
GOTERM_BP_DIRECT	GO:0070945~neutrophil mediated killing of gram-negative bacterium	2	0.185874	0.0995836	TUSC2, TREM1	859	2	16792	19.5483	1	0.995143	84.7049
GOTERM_BP_DIRECT	GO:1900426~positive regulation of defense response to bacterium	2	0.185874	0.0995836	HAVCR2, CYBA	859	2	16792	19.5483	1	0.995143	84.7049
GOTERM_BP_DIRECT	GO:0044571~[2Fe-2S] cluster assembly	2	0.185874	0.0995836	ISCU, NFS1	859	2	16792	19.5483	1	0.995143	84.7049
GOTERM_BP_DIRECT	GO:0015876~acetyl-CoA transport	2	0.185874	0.0995836	MFSD3, SLC33A1	859	2	16792	19.5483	1	0.995143	84.7049
GOTERM_BP_DIRECT	GO:0017186~peptidyl-pyroglutamic acid biosynthetic process, using glutaminyl-peptide cyclotransferase	2	0.185874	0.0995836	QPCT, QPCTL	859	2	16792	19.5483	1	0.995143	84.7049

## Sheet: Table S5 - RBPs DE levels
# fisher test of down-regualted genes and collected RBP Gene set. With p-value2.53e-19 and odds ratio 6.629
		Down-regualted
		yes	no
SF	yes	42	150
	no	1031	23283
# fisher test of up-regualted genes and collected RBP Gene set. With p-value 0.856 and odds ratio 0.697
		Up-regulated
		yes	no
SF	yes	6	186
	no	1076	23283
#down-regulated RBPs in cellular senescence
BUD13
CPSF6
CSTF2T
DDX19B
DGCR8
DHX9
DROSHA
EIF4G2
EWSR1
HNRNPA1
HNRNPA2B1
HNRNPD
HNRNPDL
HNRNPF
HNRNPH1
HNRNPH3
HNRNPK
HNRNPL
HNRNPM
HNRNPU
HNRNPUL1
IGF2BP2
ILF3
KHDRBS1
NUDT21
PTBP1
QKI
RBFOX2
RBMX
SFPQ
SLBP
SNRPA
SRSF1
SRSF10
SRSF2
SRSF3
SRSF6
SRSF7
SYNCRIP
TNRC6A
TRA2B
XRCC6
#up-regulated RBPs in cellular senescence
AKAP8L
CPEB4
DDX24
FXR2
SUPV3L1
ZNF622

## Sheet: Table S6 - ASEs statistics
#statistics of the differentially splicing events result of the separate experiment
Type	trim_mean	trim_sd	Meta-anlysis	SRP040745.Replicative.BJ	SRP046254.RAS.IMR90	SRP051599.Replicative.HFF	SRP017142.RAS.WI38	SRP043644.Oxidative.astrocyte	SRP065206.RAS.IMR90	SRP062871.RAS.IMR90	SRP034541.Replicative.IMR90	SRP050179.Replicative.BJ	SRP050179.Replicative.HFF	SRP050179.Replicative.IMR90	SRP050179.Replicative.WI38	SRP062872.RAS.IMR90	SRP062872.Etoposide.IMR90
A3SS	67	34.6892	19	44	701	46	95	50	74	28	21	34	155	84	96	42	56
A5SS	68.0833	38.2393	14	35	690	35	104	51	70	21	30	36	187	95	82	36	56
MXE	85.1667	50.2091	42	18	1143	37	100	117	74	42	102	10	229	70	111	52	70
RI	104.917	57.2137	67	77	587	61	177	58	75	44	110	42	233	158	107	59	100
SE	504	290.965	264	154	4588	302	536	337	508	205	386	200	1279	838	734	265	458

## Sheet: Table S7 - common ASEs in CS
#A3SS type ASEs
ID	GeneID	geneSymbol	chr	strand	longExonStart_0base	longExonEnd	shortES	shortEE	flankingES	flankingEE
chr1_-_1326145_1328183_1326145_1326245_1328775_1328840	ENSG00000221978	CCNL2	chr1	-	1326145	1328183	1326145	1326245	1328775	1328840
chr12_-_80172329_80173131_80172329_80172380_80175594_80175642	ENSG00000058272	PPP1R12A	chr12	-	80172329	80173131	80172329	80172380	80175594	80175642
chr13_+_76409287_76409475_76409368_76409475_76408361_76408523	ENSG00000136153	LMO7	chr13	+	76409287	76409475	76409368	76409475	76408361	76408523
chr14_-_21731469_21731741_21731469_21731495_21737456_21737584	ENSG00000092199	HNRNPC	chr14	-	21731469	21731741	21731469	21731495	21737456	21737584
chr14_-_21731469_21731988_21731469_21731495_21737456_21737601	ENSG00000092199	HNRNPC	chr14	-	21731469	21731988	21731469	21731495	21737456	21737601
chr14_+_70236227_70237257_70237183_70237257_70235898_70235968	ENSG00000100650	SRSF5	chr14	+	70236227	70237257	70237183	70237257	70235898	70235968
chr16_-_3023138_3023446_3023138_3023216_3024000_3024158	ENSG00000127564	PKMYT1	chr16	-	3023138	3023446	3023138	3023216	3024000	3024158
chr17_+_16342894_16343567_16343498_16343567_16342640_16342728	ENSG00000175061	C17orf76-AS1	chr17	+	16342894	16343567	16343498	16343567	16342640	16342728
chr17_+_25634769_25636298_25636125_25636298_25633807_25633908	ENSG00000109046	WSB1	chr17	+	25634769	25636298	25636125	25636298	25633807	25633908
chr18_-_47017901_47018203_47017901_47017954_47018827_47018906	ENSG00000215472	RPL17-C18orf32	chr18	-	47017901	47018203	47017901	47017954	47018827	47018906
chr19_-_14520553_14520793_14520553_14520685_14521027_14521146	ENSG00000123136	DDX39A	chr19	-	14520553	14520793	14520553	14520685	14521027	14521146
chr19_-_14520553_14520796_14520553_14520685_14521027_14521146	ENSG00000123136	DDX39A	chr19	-	14520553	14520796	14520553	14520685	14521027	14521146
chr19_-_4446045_4446410_4446045_4446194_4446496_4446714	ENSG00000167671	UBXN6	chr19	-	4446045	4446410	4446045	4446194	4446496	4446714
chr2_-_9546789_9547727_9546789_9547034_9548241_9548334	ENSG00000119185	ITGB1BP1	chr2	-	9546789	9547727	9546789	9547034	9548241	9548334
chr3_-_149682690_149684373_149682690_149684051_149686144_149686337	ENSG00000070087	PFN2	chr3	-	149682690	149684373	149682690	149684051	149686144	149686337
chr4_-_103747641_103748001_103747641_103747793_103748748_103749105	ENSG00000109332	UBE2D3	chr4	-	103747641	103748001	103747641	103747793	103748748	103749105
chr6_-_75794041_75796273_75794041_75795081_75797292_75797463	ENSG00000111799	COL12A1	chr6	-	75794041	75796273	75794041	75795081	75797292	75797463
chr8_-_93897547_93898963_93897547_93898895_93904216_93904302	ENSG00000205133	TRIQK	chr8	-	93897547	93898963	93897547	93898895	93904216	93904302
chr9_+_137721821_137722022_137721953_137722022_137717637_137717750	ENSG00000130635	COL5A1	chr9	+	137721821	137722022	137721953	137722022	137717637	137717750
#A5SS type ASEs
ID	GeneID	geneSymbol	chr	strand	longExonStart_0base	longExonEnd	shortES	shortEE	flankingES	flankingEE
chr12_+_48528725_48529166_48528725_48528821_48531503_48531629	ENSG00000152556	PFKM	chr12	+	48528725	48529166	48528725	48528821	48531503	48531629
chr12_-_56558086_56558515_56558431_56558515_56557128_56557549	ENSG00000139613	SMARCC2	chr12	-	56558086	56558515	56558431	56558515	56557128	56557549
chr14_-_21898959_21900017_21899969_21900017_21897122_21897494	ENSG00000100888	CHD8	chr14	-	21898959	21900017	21899969	21900017	21897122	21897494
chr15_+_63335904_63336351_63335904_63336030_63349183_63349317	ENSG00000140416	TPM1	chr15	+	63335904	63336351	63335904	63336030	63349183	63349317
chr17_+_16342640_16343017_16342640_16342728_16343498_16343567	ENSG00000175061	C17orf76-AS1	chr17	+	16342640	16343017	16342640	16342728	16343498	16343567
chr17_-_73127059_73127376_73127139_73127376_73126847_73126962	ENSG00000125458	NT5C	chr17	-	73127059	73127376	73127139	73127376	73126847	73126962
chr18_-_47018644_47018849_47018827_47018849_47017886_47017954	ENSG00000215472	RPL17-C18orf32	chr18	-	47018644	47018849	47018827	47018849	47017886	47017954
chr20_+_2636579_2636860_2636579_2636680_2637046_2637195	ENSG00000101361	NOP56	chr20	+	2636579	2636860	2636579	2636680	2637046	2637195
chr2_+_192542861_192543431_192542861_192542967_192543715_192543854	ENSG00000173559	NABP1	chr2	+	192542861	192543431	192542861	192542967	192543715	192543854
chr4_-_104006855_104007697_104007636_104007697_104006505_104006619	ENSG00000164039	BDH2	chr4	-	104006855	104007697	104007636	104007697	104006505	104006619
chr4_+_119199863_119200292_119199863_119199947_119200543_119200586	ENSG00000269893	SNHG8	chr4	+	119199863	119200292	119199863	119199947	119200543	119200586
chr8_+_144329279_144329919_144329279_144329312_144331859_144333510	ENSG00000264668	ZFP41	chr8	+	144329279	144329919	144329279	144329312	144331859	144333510
chr8_+_42932358_42935584_42932358_42932507_42938260_42938323	ENSG00000168522	FNTA	chr8	+	42932358	42935584	42932358	42932507	42938260	42938323
chr9_-_136338536_136339210_136339101_136339210_136338226_136338372	ENSG00000160326	SLC2A6	chr9	-	136338536	136339210	136339101	136339210	136338226	136338372
#MXE type ASEs
ID	GeneID	geneSymbol	chr	strand	X1stExonStart_0base	X1stExonEnd	X2ndExonStart_0base	X2ndExonEnd	upstreamES	upstreamEE	downstreamES	downstreamEE
chr11_+_35219667_35219793_35229651_35229753_35211381_35211612_35236398_35236461	ENSG00000026508	CD44	chr11	+	35219667	35219793	35229651	35229753	35211381	35211612	35236398	35236461
chr11_+_35219667_35219793_35229651_35229756_35211381_35211612_35236398_35236461	ENSG00000026508	CD44	chr11	+	35219667	35219793	35229651	35229756	35211381	35211612	35236398	35236461
chr11_+_35219667_35219793_35232792_35232996_35211381_35211612_35236398_35236461	ENSG00000026508	CD44	chr11	+	35219667	35219793	35232792	35232996	35211381	35211612	35236398	35236461
chr11_+_35219667_35219793_35232810_35232996_35211381_35211612_35236398_35236461	ENSG00000026508	CD44	chr11	+	35219667	35219793	35232810	35232996	35211381	35211612	35236398	35236461
chr11_+_70266505_70266616_70267575_70267686_70265851_70265962_70269045_70269101	ENSG00000085733	CTTN	chr11	+	70266505	70266616	70267575	70267686	70265851	70265962	70269045	70269101
chr11_+_85340175_85340306_85342188_85342360_85339636_85339732_85342730_85342852	ENSG00000171204	TMEM126B	chr11	+	85340175	85340306	85342188	85342360	85339636	85339732	85342730	85342852
chr13_+_27250685_27250861_27254171_27254338_27246008_27246126_27255190_27255457	ENSG00000132970	WASF3	chr13	+	27250685	27250861	27254171	27254338	27246008	27246126	27255190	27255457
chr14_-_69345174_69345237_69345705_69345786_69343798_69343957_69346678_69346825	ENSG00000072110	ACTN1	chr14	-	69345174	69345237	69345705	69345786	69343798	69343957	69346678	69346825
chr14_-_69345174_69345240_69345705_69345786_69343798_69343957_69346678_69346825	ENSG00000072110	ACTN1	chr14	-	69345174	69345240	69345705	69345786	69343798	69343957	69346678	69346825
chr15_-_60682411_60682516_60688349_60688626_60678226_60678285_60689456_60689537	ENSG00000182718	ANXA2	chr15	-	60682411	60682516	60688349	60688626	60678226	60678285	60689456	60689537
chr15_-_60682411_60682516_60688349_60688626_60678226_60678285_60690141_60690185	ENSG00000182718	ANXA2	chr15	-	60682411	60682516	60688349	60688626	60678226	60678285	60690141	60690185
chr15_+_63335904_63336030_63336225_63336351_63334956_63335142_63349183_63349317	ENSG00000140416	TPM1	chr15	+	63335904	63336030	63336225	63336351	63334956	63335142	63349183	63349317
chr15_+_63353396_63353472_63353911_63353987_63353067_63353138_63354413_63354476	ENSG00000140416	TPM1	chr15	+	63353396	63353472	63353911	63353987	63353067	63353138	63354413	63354476
chr15_-_72494794_72494961_72495362_72495529_72492814_72492996_72499068_72499221	ENSG00000067225	PKM	chr15	-	72494794	72494961	72495362	72495529	72492814	72492996	72499068	72499221
chr16_-_57819375_57819578_57824841_57824978_57806134_57806200_57828910_57829053	ENSG00000140859	KIFC3	chr16	-	57819375	57819578	57824841	57824978	57806134	57806200	57828910	57829053
chr16_+_67881180_67881359_67899004_67899132_67880837_67880888_67902242_67902314	ENSG00000102898	NUTF2	chr16	+	67881180	67881359	67899004	67899132	67880837	67880888	67902242	67902314
chr17_+_16342640_16342728_16342973_16343017_16342351_16342374_16343498_16343567	ENSG00000175061	C17orf76-AS1	chr17	+	16342640	16342728	16342973	16343017	16342351	16342374	16343498	16343567
chr17_-_27211242_27211333_27212874_27212965_27210125_27210249_27215962_27216044	ENSG00000132589	FLOT2	chr17	-	27211242	27211333	27212874	27212965	27210125	27210249	27215962	27216044
chr18_-_47017721_47017954_47017995_47018203_47017162_47017297_47018827_47018906	ENSG00000215472	RPL17-C18orf32	chr18	-	47017721	47017954	47017995	47018203	47017162	47017297	47018827	47018906
chr18_-_47017901_47017954_47017995_47018203_47017162_47017297_47018827_47018906	ENSG00000215472	RPL17-C18orf32	chr18	-	47017901	47017954	47017995	47018203	47017162	47017297	47018827	47018906
chr19_-_1612205_1612429_1615283_1615519_1611702_1611848_1615684_1615820	ENSG00000071564	TCF3	chr19	-	1612205	1612429	1615283	1615519	1611702	1611848	1615684	1615820
chr19_-_1612205_1612432_1615283_1615519_1609292_1611848_1615684_1615820	ENSG00000071564	TCF3	chr19	-	1612205	1612432	1615283	1615519	1609292	1611848	1615684	1615820
chr19_+_17288605_17288695_17291735_17291849_17286471_17286550_17294637_17294677	ENSG00000099331	MYO9B	chr19	+	17288605	17288695	17291735	17291849	17286471	17286550	17294637	17294677
chr2_+_119988195_119988610_119996938_119997006_119981406_119981464_120003064_120003564	ENSG00000115107	STEAP3	chr2	+	119988195	119988610	119996938	119997006	119981406	119981464	120003064	120003564
chr2_+_192265474_192265561_192267357_192267444_192265107_192265194_192272840_192272915	ENSG00000128641	MYO1B	chr2	+	192265474	192265561	192267357	192267444	192265107	192265194	192272840	192272915
chr2_-_238289557_238290142_238296224_238296827_238285414_238285987_238303229_238303847	ENSG00000163359	COL6A3	chr2	-	238289557	238290142	238296224	238296827	238285414	238285987	238303229	238303847
chr2_-_238289557_238290142_238296224_238296827_238285414_238285987_238305369_238305490	ENSG00000163359	COL6A3	chr2	-	238289557	238290142	238296224	238296827	238285414	238285987	238305369	238305490
chr2_-_238296224_238296316_238303229_238303847_238289557_238290142_238305369_238305490	ENSG00000163359	COL6A3	chr2	-	238296224	238296316	238303229	238303847	238289557	238290142	238305369	238305490
chr2_-_238296224_238296827_238303229_238303847_238289557_238290142_238305369_238305490	ENSG00000163359	COL6A3	chr2	-	238296224	238296827	238303229	238303847	238289557	238290142	238305369	238305490
chr2_+_272036_272150_272191_272305_271865_271939_275139_275201	ENSG00000143727	ACP1	chr2	+	272036	272150	272191	272305	271865	271939	275139	275201
chr5_+_102309819_102310140_102323221_102323275_102296861_102296933_102325975_102326105	ENSG00000145730	PAM	chr5	+	102309819	102310140	102323221	102323275	102296861	102296933	102325975	102326105
chr5_-_134686512_134686603_134688635_134688735_134681657_134681747_134696186_134696297	ENSG00000113648	H2AFY	chr5	-	134686512	134686603	134688635	134688735	134681657	134681747	134696186	134696297
chr5_-_176918404_176918421_176918807_176918977_176918010_176918147_176919405_176919436	ENSG00000196923	PDLIM7	chr5	-	176918404	176918421	176918807	176918977	176918010	176918147	176919405	176919436
chr5_+_82815167_82818128_82832825_82838087_82807921_82808215_82841355_82841469	ENSG00000038427	VCAN	chr5	+	82815167	82818128	82832825	82838087	82807921	82808215	82841355	82841469
chr6_-_112020717_112020873_112021306_112021471_112017479_112017659_112024087_112024237	ENSG00000010810	FYN	chr6	-	112020717	112020873	112021306	112021471	112017479	112017659	112024087	112024237
chr7_+_128394315_128394509_128394582_128394776_128388626_128388858_128398924_128399091	ENSG00000128595	CALU	chr7	+	128394315	128394509	128394582	128394776	128388626	128388858	128398924	128399091
chr8_-_62531536_62531578_62546241_62546286_62496502_62496588_62550505_62550562	ENSG00000198363	ASPH	chr8	-	62531536	62531578	62546241	62546286	62496502	62496588	62550505	62550562
chr9_-_131030698_131030803_131035063_131035144_131030395_131030439_131036128_131036251	ENSG00000167110	GOLGA2	chr9	-	131030698	131030803	131035063	131035144	131030395	131030439	131036128	131036251
chr9_+_137721821_137721890_137721953_137722022_137717637_137717750_137726816_137727050	ENSG00000130635	COL5A1	chr9	+	137721821	137721890	137721953	137722022	137717637	137717750	137726816	137727050
chr9_-_35684728_35684804_35685060_35685136_35684484_35684547_35685265_35685336	ENSG00000198467	TPM2	chr9	-	35684728	35684804	35685060	35685136	35684484	35684547	35685265	35685336
chrX_-_41414852_41414888_41416284_41416353_41412971_41413168_41419031_41419100	ENSG00000147044	CASK	chrX	-	41414852	41414888	41416284	41416353	41412971	41413168	41419031	41419100
chrX_+_73166833_73167209_73214674_73214796_73164418_73164497_73218602_73218679	ENSG00000225470	JPX	chrX	+	73166833	73167209	73214674	73214796	73164418	73164497	73218602	73218679
#RI type of ASEs
ID	GeneID	geneSymbol	chr	strand	riExonStart_0base	riExonEnd	upstreamES	upstreamEE	downstreamES	downstreamEE
chr10_+_70096955_70098444_70096955_70097090_70098259_70098444	ENSG00000096746	HNRNPH3	chr10	+	70096955	70098444	70096955	70097090	70098259	70098444
chr11_-_12023295_12023984_12023295_12023319_12023846_12023984	ENSG00000050165	DKK3	chr11	-	12023295	12023984	12023295	12023319	12023846	12023984
chr1_-_151027491_151028469_151027491_151027602_151028152_151028469	ENSG00000197622	CDC42SE1	chr1	-	151027491	151028469	151027491	151027602	151028152	151028469
chr11_-_532241_532755_532241_532522_532630_532755	ENSG00000174775	HRAS	chr11	-	532241	532755	532241	532522	532630	532755
chr1_-_153598795_153600074_153598795_153599009_153599958_153600074	ENSG00000189171	S100A13	chr1	-	153598795	153600074	153598795	153599009	153599958	153600074
chr1_+_156107444_156108548_156107444_156107534_156108278_156108548	ENSG00000160789	LMNA	chr1	+	156107444	156108548	156107444	156107534	156108278	156108548
chr11_-_62566010_62567958_62566010_62566047_62567848_62567958	ENSG00000162231	NXF1	chr11	-	62566010	62567958	62566010	62566047	62567848	62567958
chr11_+_65632190_65632616_65632190_65632286_65632585_65632616	ENSG00000172732	MUS81	chr11	+	65632190	65632616	65632190	65632286	65632585	65632616
chr1_-_173833394_173833644_173833394_173833442_173833621_173833644	ENSG00000234741	GAS5	chr1	-	173833394	173833644	173833394	173833442	173833621	173833644
chr1_-_173833394_173834420_173833394_173833842_173834366_173834420	ENSG00000234741	GAS5	chr1	-	173833394	173834420	173833394	173833842	173834366	173834420
chr1_-_173833621_173833842_173833621_173833644_173833812_173833842	ENSG00000234741	GAS5	chr1	-	173833621	173833842	173833621	173833644	173833812	173833842
chr1_-_173834366_173834685_173834366_173834420_173834608_173834685	ENSG00000234741	GAS5	chr1	-	173834366	173834685	173834366	173834420	173834608	173834685
chr1_-_173835665_173835934_173835665_173835705_173835898_173835934	ENSG00000234741	GAS5	chr1	-	173835665	173835934	173835665	173835705	173835898	173835934
chr1_+_207940357_207943707_207940357_207940540_207943665_207943707	ENSG00000117335	CD46	chr1	+	207940357	207943707	207940357	207940540	207943665	207943707
chr12_+_108957835_108958168_108957835_108957931_108958054_108958168	ENSG00000136003	ISCU	chr12	+	108957835	108958168	108957835	108957931	108958054	108958168
chr12_-_123003385_123005975_123003385_123003576_123005931_123005975	ENSG00000111011	RSRC2	chr12	-	123003385	123005975	123003385	123003576	123005931	123005975
chr12_+_123465675_123466426_123465675_123465813_123466117_123466426	ENSG00000182196	ARL6IP4	chr12	+	123465675	123466426	123465675	123465813	123466117	123466426
chr12_+_123465675_123466426_123465675_123465846_123466117_123466426	ENSG00000182196	ARL6IP4	chr12	+	123465675	123466426	123465675	123465846	123466117	123466426
chr1_-_233119881_233122286_233119881_233120223_233121837_233122286	ENSG00000135749	PCNXL2	chr1	-	233119881	233122286	233119881	233120223	233121837	233122286
chr1_-_243349080_243349724_243349080_243349374_243349560_243349724	ENSG00000143702	CEP170	chr1	-	243349080	243349724	243349080	243349374	243349560	243349724
chr12_+_56510564_56510995_56510564_56510647_56510972_56510995	ENSG00000229117	RPL41	chr12	+	56510564	56510995	56510564	56510647	56510972	56510995
chr12_-_57499250_57500122_57499250_57499382_57499973_57500122	ENSG00000166888	STAT6	chr12	-	57499250	57500122	57499250	57499382	57499973	57500122
chr14_-_24614918_24615449_24614918_24615105_24615416_24615449	ENSG00000100911	PSME2	chr14	-	24614918	24615449	24614918	24615105	24615416	24615449
chr14_+_70235898_70237257_70235898_70235968_70237183_70237257	ENSG00000100650	SRSF5	chr14	+	70235898	70237257	70235898	70235968	70237183	70237257
chr14_+_73566374_73570186_73566374_73566458_73569899_73570186	ENSG00000119707	RBM25	chr14	+	73566374	73570186	73566374	73566458	73569899	73570186
chr15_+_74912349_74914557_74912349_74912566_74914460_74914557	ENSG00000179335	CLK3	chr15	+	74912349	74914557	74912349	74912566	74914460	74914557
chr16_+_24816334_24817054_24816334_24816472_24816994_24817054	ENSG00000090905	TNRC6A	chr16	+	24816334	24817054	24816334	24816472	24816994	24817054
chr16_+_30007564_30007938_30007564_30007712_30007867_30007938	ENSG00000169592	INO80E	chr16	+	30007564	30007938	30007564	30007712	30007867	30007938
chr16_+_448207_449123_448207_448394_448989_449123	ENSG00000103202	NME4	chr16	+	448207	449123	448207	448394	448989	449123
chr16_-_70542308_70543291_70542308_70542367_70543133_70543291	ENSG00000103051	COG4	chr16	-	70542308	70543291	70542308	70542367	70543133	70543291
chr16_+_731792_732076_731792_731880_732019_732076	ENSG00000103266	STUB1	chr16	+	731792	732076	731792	731880	732019	732076
chr17_+_16342640_16343567_16342640_16342728_16343498_16343567	ENSG00000175061	C17orf76-AS1	chr17	+	16342640	16343567	16342640	16342728	16343498	16343567
chr17_+_16342640_16343567_16342640_16343017_16343498_16343567	ENSG00000175061	C17orf76-AS1	chr17	+	16342640	16343567	16342640	16343017	16343498	16343567
chr17_-_62496666_62498187_62496666_62496891_62498127_62498187	ENSG00000108654	DDX5	chr17	-	62496666	62498187	62496666	62496891	62498127	62498187
chr19_-_14520553_14521146_14520553_14520685_14521027_14521146	ENSG00000123136	DDX39A	chr19	-	14520553	14521146	14520553	14520685	14521027	14521146
chr19_-_19105174_19106089_19105174_19105295_19105952_19106089	ENSG00000064607	SUGP2	chr19	-	19105174	19106089	19105174	19105295	19105952	19106089
chr19_-_36605240_36605615_36605240_36605314_36605560_36605615	ENSG00000105258	POLR2I	chr19	-	36605240	36605615	36605240	36605314	36605560	36605615
chr1_+_94016503_94020216_94016503_94016662_94017965_94020216	ENSG00000137942	FNBP1L	chr1	+	94016503	94020216	94016503	94016662	94017965	94020216
chr19_-_50430950_50432761_50430950_50431105_50432582_50432761	ENSG00000213024	NUP62	chr19	-	50430950	50432761	50430950	50431105	50432582	50432761
chr19_-_5218430_5219478_5218430_5218543_5219320_5219478	ENSG00000105426	PTPRS	chr19	-	5218430	5219478	5218430	5218543	5219320	5219478
chr20_-_34326889_34328809_34326889_34326939_34328745_34328809	ENSG00000131051	RBM39	chr20	-	34326889	34328809	34326889	34326939	34328745	34328809
chr2_+_105959304_105959680_105959304_105959431_105959557_105959680	ENSG00000135974	C2orf49	chr2	+	105959304	105959680	105959304	105959431	105959557	105959680
chr21_-_28212193_28212881_28212193_28212380_28212594_28212881	ENSG00000154734	ADAMTS1	chr21	-	28212193	28212881	28212193	28212380	28212594	28212881
chr2_-_216243852_216247048_216243852_216244040_216246934_216247048	ENSG00000115414	FN1	chr2	-	216243852	216247048	216243852	216244040	216246934	216247048
chr22_+_21350251_21351090_21350251_21350401_21350984_21351090	ENSG00000099949	LZTR1	chr22	+	21350251	21351090	21350251	21350401	21350984	21351090
chr22_+_38087180_38089483_38087180_38087431_38089338_38089483	ENSG00000256872	NOL12	chr22	+	38087180	38089483	38087180	38087431	38089338	38089483
chr22_-_38883883_38888120_38883883_38884120_38888060_38888120	ENSG00000100201	DDX17	chr22	-	38883883	38888120	38883883	38884120	38888060	38888120
chr22_+_39916568_39917676_39916568_39916756_39917358_39917676	ENSG00000128272	ATF4	chr22	+	39916568	39917676	39916568	39916756	39917358	39917676
chr2_+_85769277_85769870_85769277_85769496_85769687_85769870	ENSG00000168906	MAT2A	chr2	+	85769277	85769870	85769277	85769496	85769687	85769870
chr3_-_132297639_132298402_132297639_132297725_132298335_132298402	ENSG00000240303	ACAD11	chr3	-	132297639	132298402	132297639	132297725	132298335	132298402
chr3_-_48608675_48609478_48608675_48608711_48609433_48609478	ENSG00000114270	COL7A1	chr3	-	48608675	48609478	48608675	48608711	48609433	48609478
chr3_-_49065863_49066239_49065863_49065965_49066190_49066239	ENSG00000178035	IMPDH2	chr3	-	49065863	49066239	49065863	49065965	49066190	49066239
chr4_-_104006505_104007697_104006505_104006619_104007636_104007697	ENSG00000164039	BDH2	chr4	-	104006505	104007697	104006505	104006619	104007636	104007697
chr5_+_135390404_135391081_135390404_135390550_135390957_135391081	ENSG00000120708	TGFBI	chr5	+	135390404	135391081	135390404	135390550	135390957	135391081
chr5_-_179047892_179048398_179047892_179048036_179048242_179048398	ENSG00000169045	HNRNPH1	chr5	-	179047892	179048398	179047892	179048036	179048242	179048398
chr6_-_109767338_109767975_109767338_109767615_109767881_109767975	ENSG00000135596	MICAL1	chr6	-	109767338	109767975	109767338	109767615	109767881	109767975
chr6_+_134212850_134216691_134212850_134212948_134214292_134216691	ENSG00000118526	TCF21	chr6	+	134212850	134216691	134212850	134212948	134214292	134216691
chr6_-_160100095_160103670_160100095_160100330_160103505_160103670	ENSG00000112096	SOD2	chr6	-	160100095	160103670	160100095	160100330	160103505	160103670
chr6_+_52317485_52319085_52317485_52317635_52318892_52319085	ENSG00000096093	EFHC1	chr6	+	52317485	52319085	52317485	52317635	52318892	52319085
chr6_-_99851704_99852578_99851704_99851758_99852478_99852578	ENSG00000132424	PNISR	chr6	-	99851704	99852578	99851704	99851758	99852478	99852578
chr7_+_4829462_4830222_4829462_4829560_4830089_4830222	ENSG00000242802	AP5Z1	chr7	+	4829462	4830222	4829462	4829560	4830089	4830222
chr8_-_145657667_145659142_145657667_145657843_145658970_145659142	ENSG00000160949	TONSL	chr8	-	145657667	145659142	145657667	145657843	145658970	145659142
chr9_-_35091236_35092764_35091236_35091288_35092539_35092764	ENSG00000165282	PIGO	chr9	-	35091236	35092764	35091236	35091288	35092539	35092764
chr9_+_95872849_95874571_95872849_95873003_95874499_95874571	ENSG00000165233	C9orf89	chr9	+	95872849	95874571	95872849	95873003	95874499	95874571
chrX_-_100870109_100871756_100870109_100870750_100871661_100871756	ENSG00000198960	ARMCX6	chrX	-	100870109	100871756	100870109	100870750	100871661	100871756
chrX_-_153051220_153051727_153051220_153051428_153051666_153051727	ENSG00000067829	IDH3G	chrX	-	153051220	153051727	153051220	153051428	153051666	153051727
chrX_+_48433948_48434807_48433948_48434055_48434701_48434807	ENSG00000102317	RBM3	chrX	+	48433948	48434807	48433948	48434055	48434701	48434807
#SE type of ASEs
ID	GeneID	geneSymbol	chr	strand	exonStart_0base	exonEnd	upstreamES	upstreamEE	downstreamES	downstreamEE
chr10_+_111892062_111892158_111890120_111890244_111893083_111893969	ENSG00000148700	ADD3	chr10	+	111892062	111892158	111890120	111890244	111893083	111893969
chr10_-_127477851_127478097_127477150_127477574_127483448_127483547	ENSG00000188690	UROS	chr10	-	127477851	127478097	127477150	127477574	127483448	127483547
chr10_-_127482590_127482957_127477293_127477574_127483448_127483547	ENSG00000188690	UROS	chr10	-	127482590	127482957	127477293	127477574	127483448	127483547
chr10_-_29824917_29824998_29820182_29820217_29839525_29840192	ENSG00000197321	SVIL	chr10	-	29824917	29824998	29820182	29820217	29839525	29840192
chr10_+_70097614_70097753_70096955_70097090_70098259_70098444	ENSG00000096746	HNRNPH3	chr10	+	70097614	70097753	70096955	70097090	70098259	70098444
chr10_+_7848936_7848973_7844720_7844817_7849621_7849764	ENSG00000165629	ATP5C1	chr10	+	7848936	7848973	7844720	7844817	7849621	7849764
chr10_+_79799958_79799983_79796951_79797062_79800372_79800505	ENSG00000138326	RPS24	chr10	+	79799958	79799983	79796951	79797062	79800372	79800505
chr10_+_79799961_79799983_79796951_79797062_79800372_79800428	ENSG00000138326	RPS24	chr10	+	79799961	79799983	79796951	79797062	79800372	79800428
chr11_-_111956701_111957034_111955523_111956186_111957363_111957522	ENSG00000150779	TIMM8B	chr11	-	111956701	111957034	111955523	111956186	111957363	111957522
chr1_-_111493909_111495437_111492472_111492745_111506242_111506701	ENSG00000121931	LRIF1	chr1	-	111493909	111495437	111492472	111492745	111506242	111506701
chr11_+_129993506_129993674_129992199_129992408_129996594_129996725	ENSG00000084234	APLP2	chr11	+	129993506	129993674	129992199	129992408	129996594	129996725
chr1_-_113247674_113247790_113246265_113246428_113249699_113249757	ENSG00000155366	RHOC	chr1	-	113247674	113247790	113246265	113246428	113249699	113249757
chr1_-_113247721_113247745_113246265_113246428_113249699_113249747	ENSG00000155366	RHOC	chr1	-	113247721	113247745	113246265	113246428	113249699	113249747
chr1_-_113247721_113247790_113246265_113246428_113249699_113250025	ENSG00000155366	RHOC	chr1	-	113247721	113247790	113246265	113246428	113249699	113250025
chr1_-_113247721_113247823_113246265_113246428_113249699_113249724	ENSG00000155366	RHOC	chr1	-	113247721	113247823	113246265	113246428	113249699	113249724
chr1_-_1328058_1328183_1326145_1326245_1328775_1328840	ENSG00000221978	CCNL2	chr1	-	1328058	1328183	1326145	1326245	1328775	1328840
chr11_-_34916556_34916657_34912050_34912099_34937774_34938046	ENSG00000149089	APIP	chr11	-	34916556	34916657	34912050	34912099	34937774	34938046
chr11_+_47591251_47591443_47587457_47587538_47593022_47593295	ENSG00000213619	NDUFS3	chr11	+	47591251	47591443	47587457	47587538	47593022	47593295
chr1_+_150252053_150252152_150248929_150249040_150253245_150253327	ENSG00000118292	C1orf54	chr1	+	150252053	150252152	150248929	150249040	150253245	150253327
chr1_+_150483932_150484307_150483351_150483674_150484827_150485048	ENSG00000143369	ECM1	chr1	+	150483932	150484307	150483351	150483674	150484827	150485048
chr1_+_150484154_150484307_150483351_150483674_150484827_150485048	ENSG00000143369	ECM1	chr1	+	150484154	150484307	150483351	150483674	150484827	150485048
chr1_-_151029131_151029262_151028360_151028469_151031954_151032249	ENSG00000197622	CDC42SE1	chr1	-	151029131	151029262	151028360	151028469	151031954	151032249
chr11_-_62401781_62401847_62400916_62400986_62402292_62402472	ENSG00000089597	GANAB	chr11	-	62401781	62401847	62400916	62400986	62402292	62402472
chr1_+_162562521_162562572_162560112_162560301_162567581_162567648	ENSG00000117143	UAP1	chr1	+	162562521	162562572	162560112	162560301	162567581	162567648
chr1_+_162562524_162562572_162560112_162560301_162567581_162567648	ENSG00000117143	UAP1	chr1	+	162562524	162562572	162560112	162560301	162567581	162567648
chr11_+_63486173_63488504_63448954_63449250_63517462_63517670	ENSG00000133318	RTN3	chr11	+	63486173	63488504	63448954	63449250	63517462	63517670
chr11_+_63486452_63488504_63448967_63449250_63517462_63517670	ENSG00000133318	RTN3	chr11	+	63486452	63488504	63448967	63449250	63517462	63517670
chr11_+_65161043_65161145_65156831_65156999_65161511_65161570	ENSG00000126391	FRMD8	chr11	+	65161043	65161145	65156831	65156999	65161511	65161570
chr11_+_66410920_66411611_66407170_66407594_66413497_66413940	ENSG00000173933	RBM4	chr11	+	66410920	66411611	66407170	66407594	66413497	66413940
chr11_+_70267575_70267642_70266505_70266616_70269045_70269101	ENSG00000085733	CTTN	chr11	+	70267575	70267642	70266505	70266616	70269045	70269101
chr11_+_70267575_70267686_70266505_70266616_70269045_70269101	ENSG00000085733	CTTN	chr11	+	70267575	70267686	70266505	70266616	70269045	70269101
chr11_-_73587523_73587620_73584041_73584439_73587801_73587888	ENSG00000181924	COA4	chr11	-	73587523	73587620	73584041	73584439	73587801	73587888
chr11_+_834529_834745_832993_833026_836062_836153	ENSG00000177697	CD151	chr11	+	834529	834745	832993	833026	836062	836153
chr11_-_85689112_85689136_85687665_85687725_85692171_85692271	ENSG00000073921	PICALM	chr11	-	85689112	85689136	85687665	85687725	85692171	85692271
chr11_-_85701292_85701421_85694908_85695016_85707868_85707972	ENSG00000073921	PICALM	chr11	-	85701292	85701421	85694908	85695016	85707868	85707972
chr11_-_85701292_85701442_85694908_85695016_85707868_85707972	ENSG00000073921	PICALM	chr11	-	85701292	85701442	85694908	85695016	85707868	85707972
chr11_-_8983638_8983730_8977736_8977845_8985755_8986320	ENSG00000175348	TMEM9B	chr11	-	8983638	8983730	8977736	8977845	8985755	8986320
chr1_-_197069560_197074315_197065127_197065294_197086918_197087113	ENSG00000066279	ASPM	chr1	-	197069560	197074315	197065127	197065294	197086918	197087113
chr12_+_107350859_107350927_107349621_107349843_107360888_107360958	ENSG00000151135	C12orf23	chr12	+	107350859	107350927	107349621	107349843	107360888	107360958
chr12_-_112279130_112279274_112278136_112278281_112279487_112279514	ENSG00000234608	MAPKAPK5-AS1	chr12	-	112279130	112279274	112278136	112278281	112279487	112279514
chr12_-_115117717_115117777_115117309_115117456_115118683_115118951	ENSG00000135111	TBX3	chr12	-	115117717	115117777	115117309	115117456	115118683	115118951
chr12_-_131280539_131280665_131275378_131276522_131283069_131283180	ENSG00000111450	STX2	chr12	-	131280539	131280665	131275378	131276522	131283069	131283180
chr12_+_27113447_27113561_27110533_27110676_27116274_27116388	ENSG00000111790	FGFR1OP2	chr12	+	27113447	27113561	27110533	27110676	27116274	27116388
chr1_-_243349080_243349374_243335998_243336148_243349560_243349724	ENSG00000143702	CEP170	chr1	-	243349080	243349374	243335998	243336148	243349560	243349724
chr12_+_44165022_44165168_44161905_44162075_44165982_44166165	ENSG00000198001	IRAK4	chr12	+	44165022	44165168	44161905	44162075	44165982	44166165
chr12_+_48529073_48529166_48528725_48528821_48531503_48531629	ENSG00000152556	PFKM	chr12	+	48529073	48529166	48528725	48528821	48531503	48531629
chr12_+_53861588_53861627_53861004_53861077_53862560_53862616	ENSG00000197111	PCBP2	chr12	+	53861588	53861627	53861004	53861077	53862560	53862616
chr12_+_56554409_56554454_56554026_56554104_56555170_56555334	ENSG00000092841	MYL6	chr12	+	56554409	56554454	56554026	56554104	56555170	56555334
chr12_-_6781515_6781698_6779925_6780004_6782381_6782606	ENSG00000126746	ZNF384	chr12	-	6781515	6781698	6779925	6780004	6782381	6782606
chr12_+_6837091_6837167_6833459_6833984_6837388_6837477	ENSG00000111652	COPS7A	chr12	+	6837091	6837167	6833459	6833984	6837388	6837477
chr12_-_91573138_91573463_91572118_91572362_91576431_91576601	ENSG00000011465	DCN	chr12	-	91573138	91573463	91572118	91572362	91576431	91576601
chr12_+_977031_978270_971248_971436_980430_980514	ENSG00000060237	WNK1	chr12	+	977031	978270	971248	971436	980430	980514
chr13_-_103419622_103419828_103418459_103418930_103420609_103420661	ENSG00000151287	TEX30	chr13	-	103419622	103419828	103418459	103418930	103420609	103420661
chr1_-_32136156_32136247_32134402_32134456_32137215_32137260	ENSG00000084636	COL16A1	chr1	-	32136156	32136247	32134402	32134456	32137215	32137260
chr1_-_32136202_32136247_32134402_32134456_32137215_32137260	ENSG00000084636	COL16A1	chr1	-	32136202	32136247	32134402	32134456	32137215	32137260
chr14_-_100841619_100841687_100835423_100835595_100842596_100842644	ENSG00000140105	WARS	chr14	-	100841619	100841687	100835423	100835595	100842596	100842644
chr14_-_100841619_100841740_100835423_100835595_100842596_100842648	ENSG00000140105	WARS	chr14	-	100841619	100841740	100835423	100835595	100842596	100842648
chr14_-_100841619_100841743_100835423_100835595_100842596_100842622	ENSG00000140105	WARS	chr14	-	100841619	100841743	100835423	100835595	100842596	100842622
chr14_+_101298848_101298978_101297757_101297871_101302503_101302637	ENSG00000214548	MEG3	chr14	+	101298848	101298978	101297757	101297871	101302503	101302637
chr14_+_101300968_101301088_101297817_101297871_101302503_101302637	ENSG00000214548	MEG3	chr14	+	101300968	101301088	101297817	101297871	101302503	101302637
chr14_+_101302072_101302216_101297757_101297871_101302503_101302637	ENSG00000214548	MEG3	chr14	+	101302072	101302216	101297757	101297871	101302503	101302637
chr14_+_101302075_101302216_101295370_101297871_101302503_101302637	ENSG00000214548	MEG3	chr14	+	101302075	101302216	101295370	101297871	101302503	101302637
chr14_+_101302381_101302412_101301862_101302216_101302503_101302637	ENSG00000214548	MEG3	chr14	+	101302381	101302412	101301862	101302216	101302503	101302637
chr14_+_103964838_103964865_103958113_103958371_103969218_103969589	ENSG00000075413	MARK3	chr14	+	103964838	103964865	103958113	103958371	103969218	103969589
chr14_+_103966492_103966537_103958113_103958371_103969218_103969619	ENSG00000075413	MARK3	chr14	+	103966492	103966537	103958113	103958371	103969218	103969619
chr14_+_104153417_104153548_104145720_104145882_104166991_104167064	ENSG00000126214	KLC1	chr14	+	104153417	104153548	104145720	104145882	104166991	104167064
chr1_-_41625396_41625605_41617285_41617356_41626546_41626570	ENSG00000010803	SCMH1	chr1	-	41625396	41625605	41617285	41617356	41626546	41626570
chr14_-_21731825_21731988_21731469_21731495_21737456_21737565	ENSG00000092199	HNRNPC	chr14	-	21731825	21731988	21731469	21731495	21737456	21737565
chr14_-_51223209_51225348_51221459_51221585_51226574_51227077	ENSG00000100503	NIN	chr14	-	51223209	51225348	51221459	51221585	51226574	51227077
chr1_+_46072992_46074009_46072153_46072263_46078840_46078920	ENSG00000132780	NASP	chr1	+	46072992	46074009	46072153	46072263	46078840	46078920
chr14_+_61510167_61510221_61509864_61509930_61512063_61512143	ENSG00000139974	SLC38A6	chr14	+	61510167	61510221	61509864	61509930	61512063	61512143
chr1_+_46775568_46775716_46774772_46774799_46775826_46775988	ENSG00000173660	UQCRH	chr1	+	46775568	46775716	46774772	46774799	46775826	46775988
chr14_-_69345174_69345237_69343798_69343957_69346678_69346825	ENSG00000072110	ACTN1	chr14	-	69345174	69345237	69343798	69343957	69346678	69346825
chr14_-_69345174_69345240_69343798_69343957_69345705_69345786	ENSG00000072110	ACTN1	chr14	-	69345174	69345240	69343798	69343957	69345705	69345786
chr14_-_69345705_69345786_69345174_69345240_69346678_69346825	ENSG00000072110	ACTN1	chr14	-	69345705	69345786	69345174	69345240	69346678	69346825
chr14_-_73745988_73746132_73743285_73744001_73749066_73749213	ENSG00000133961	NUMB	chr14	-	73745988	73746132	73743285	73744001	73749066	73749213
chr14_+_74388768_74388909_74387682_74387808_74390097_74390225	ENSG00000119725	ZNF410	chr14	+	74388768	74388909	74387682	74387808	74390097	74390225
chr15_+_63335904_63336030_63334956_63335142_63336225_63336351	ENSG00000140416	TPM1	chr15	+	63335904	63336030	63334956	63335142	63336225	63336351
chr15_+_63336225_63336351_63335904_63336030_63349183_63349317	ENSG00000140416	TPM1	chr15	+	63336225	63336351	63335904	63336030	63349183	63349317
chr15_+_63353396_63353472_63353067_63353138_63353911_63353987	ENSG00000140416	TPM1	chr15	+	63353396	63353472	63353067	63353138	63353911	63353987
chr15_+_63353911_63353987_63353396_63353472_63354413_63354476	ENSG00000140416	TPM1	chr15	+	63353911	63353987	63353396	63353472	63354413	63354476
chr15_+_80390757_80390920_80364924_80364989_80412669_80412747	ENSG00000086666	ZFAND6	chr15	+	80390757	80390920	80364924	80364989	80412669	80412747
chr15_-_85257961_85258097_85234765_85234875_85259255_85259394	ENSG00000140612	SEC11A	chr15	-	85257961	85258097	85234765	85234875	85259255	85259394
chr16_-_15141853_15141956_15141711_15141777_15149747_15149921	ENSG00000157045	NTAN1	chr16	-	15141853	15141956	15141711	15141777	15149747	15149921
chr16_-_2013653_2014366_2013149_2013257_2014449_2014632	ENSG00000140988	RPS2	chr16	-	2013653	2014366	2013149	2013257	2014449	2014632
chr16_-_27252673_27253210_27246498_27246620_27268755_27268902	ENSG00000169189	NSMCE1	chr16	-	27252673	27253210	27246498	27246620	27268755	27268902
chr16_+_2806334_2806607_2802662_2802847_2807472_2807874	ENSG00000167978	SRRM2	chr16	+	2806334	2806607	2802662	2802847	2807472	2807874
chr16_+_30012532_30012851_30012249_30012361_30016541_30016644	ENSG00000169592	INO80E	chr16	+	30012532	30012851	30012249	30012361	30016541	30016644
chr16_+_30092520_30092631_30087635_30087796_30093804_30093855	ENSG00000149923	PPP4C	chr16	+	30092520	30092631	30087635	30087796	30093804	30093855
chr16_+_30092579_30092631_30087635_30087796_30093804_30093855	ENSG00000149923	PPP4C	chr16	+	30092579	30092631	30087635	30087796	30093804	30093855
chr16_-_67265090_67265158_67264503_67264694_67265332_67265452	ENSG00000135723	FHOD1	chr16	-	67265090	67265158	67264503	67264694	67265332	67265452
chr16_+_67881180_67881359_67880837_67880888_67899004_67899132	ENSG00000102898	NUTF2	chr16	+	67881180	67881359	67880837	67880888	67899004	67899132
chr16_-_85022357_85022479_85015475_85015600_85023909_85024241	ENSG00000153786	ZDHHC7	chr16	-	85022357	85022479	85015475	85015600	85023909	85024241
chr16_-_85022368_85022479_85015475_85015600_85023909_85024241	ENSG00000153786	ZDHHC7	chr16	-	85022368	85022479	85015475	85015600	85023909	85024241
chr16_-_85022403_85022479_85015475_85015600_85023909_85024241	ENSG00000153786	ZDHHC7	chr16	-	85022403	85022479	85015475	85015600	85023909	85024241
chr16_-_88791416_88791488_88790278_88790379_88791823_88791927	ENSG00000103335	PIEZO1	chr16	-	88791416	88791488	88790278	88790379	88791823	88791927
chr16_-_88876830_88877057_88876477_88876556_88877957_88878064	ENSG00000198931	APRT	chr16	-	88876830	88877057	88876477	88876556	88877957	88878064
chr1_+_70697541_70697658_70694104_70694238_70697950_70698058	ENSG00000116754	SRSF11	chr1	+	70697541	70697658	70694104	70694238	70697950	70698058
chr17_+_16342841_16343017_16342640_16342728_16343498_16343567	ENSG00000175061	C17orf76-AS1	chr17	+	16342841	16343017	16342640	16342728	16343498	16343567
chr17_+_16342894_16343017_16342640_16342728_16343498_16343567	ENSG00000175061	C17orf76-AS1	chr17	+	16342894	16343017	16342640	16342728	16343498	16343567
chr17_+_16342973_16343017_16342640_16342728_16343498_16343567	ENSG00000175061	C17orf76-AS1	chr17	+	16342973	16343017	16342640	16342728	16343498	16343567
chr17_+_17083935_17083983_17083316_17083402_17088136_17088874	ENSG00000133030	MPRIP	chr17	+	17083935	17083983	17083316	17083402	17088136	17088874
chr17_+_25634769_25634945_25633807_25633908_25636125_25636298	ENSG00000109046	WSB1	chr17	+	25634769	25634945	25633807	25633908	25636125	25636298
chr17_-_27211242_27211333_27209996_27210249_27212874_27213029	ENSG00000132589	FLOT2	chr17	-	27211242	27211333	27209996	27210249	27212874	27213029
chr17_-_27412621_27412666_27409333_27409456_27413455_27413595	ENSG00000221995	TIAF1	chr17	-	27412621	27412666	27409333	27409456	27413455	27413595
chr17_+_30693683_30693776_30692348_30692506_30694790_30695033	ENSG00000010244	ZNF207	chr17	+	30693683	30693776	30692348	30692506	30694790	30695033
chr17_-_40155376_40155575_40152499_40152588_40169357_40169441	ENSG00000168259	DNAJC7	chr17	-	40155376	40155575	40152499	40152588	40169357	40169441
chr17_+_4795696_4795807_4795443_4795529_4795950_4796063	ENSG00000141503	MINK1	chr17	+	4795696	4795807	4795443	4795529	4795950	4796063
chr17_-_49053223_49053262_49052131_49052308_49054468_49054582	ENSG00000008294	SPAG9	chr17	-	49053223	49053262	49052131	49052308	49054468	49054582
chr1_-_75172786_75172888_75172582_75172678_75175781_75175931	ENSG00000116791	CRYZ	chr1	-	75172786	75172888	75172582	75172678	75175781	75175931
chr17_+_57764361_57764382_57762947_57763169_57767996_57768072	ENSG00000141367	CLTC	chr17	+	57764361	57764382	57762947	57763169	57767996	57768072
chr17_-_57776231_57777550_57774668_57775339_57784731_57784790	ENSG00000141378	PTRH2	chr17	-	57776231	57777550	57774668	57775339	57784731	57784790
chr17_+_61905033_61905283_61904819_61904874_61905497_61905569	ENSG00000087191	PSMC5	chr17	+	61905033	61905283	61904819	61904874	61905497	61905569
chr17_+_61905188_61905283_61904805_61904874_61905497_61905569	ENSG00000087191	PSMC5	chr17	+	61905188	61905283	61904805	61904874	61905497	61905569
chr17_+_61905210_61905283_61904819_61904874_61905497_61905569	ENSG00000087191	PSMC5	chr17	+	61905210	61905283	61904819	61904874	61905497	61905569
chr17_-_74087223_74087316_74085255_74085401_74090494_74090662	ENSG00000182473	EXOC7	chr17	-	74087223	74087316	74085255	74085401	74090494	74090662
chr17_-_74731853_74731957_74731142_74731240_74732235_74732546	ENSG00000161547	SRSF2	chr17	-	74731853	74731957	74731142	74731240	74732235	74732546
chr17_+_80010131_80010335_80009772_80009840_80011149_80011242	ENSG00000169727	GPS1	chr17	+	80010131	80010335	80009772	80009840	80011149	80011242
chr17_+_80010134_80010335_80009772_80009840_80011149_80011242	ENSG00000169727	GPS1	chr17	+	80010134	80010335	80009772	80009840	80011149	80011242
chr18_-_23615794_23615887_23614968_23615091_23618518_23618623	ENSG00000141380	SS18	chr18	-	23615794	23615887	23614968	23615091	23618518	23618623
chr18_-_47018105_47018203_47017901_47017954_47018827_47018878	ENSG00000265681	RPL17	chr18	-	47018105	47018203	47017901	47017954	47018827	47018878
chr19_+_10919244_10919256_10916591_10916643_10922939_10923053	ENSG00000079805	DNM2	chr19	+	10919244	10919256	10916591	10916643	10922939	10923053
chr19_+_1416455_1416702_1407706_1407801_1417498_1417539	ENSG00000071626	DAZAP1	chr19	+	1416455	1416702	1407706	1407801	1417498	1417539
chr19_+_14507153_14507285_14501735_14501891_14508469_14508616	ENSG00000123146	CD97	chr19	+	14507153	14507285	14501735	14501891	14508469	14508616
chr19_-_14521232_14521417_14521072_14521146_14521800_14522198	ENSG00000123136	DDX39A	chr19	-	14521232	14521417	14521072	14521146	14521800	14522198
chr19_+_19307994_19308060_19307774_19307855_19308329_19308430	ENSG00000064490	RFXANK	chr19	+	19307994	19308060	19307774	19307855	19308329	19308430
chr19_-_3546252_3546423_3546071_3546166_3547269_3547362	ENSG00000161091	MFSD12	chr19	-	3546252	3546423	3546071	3546166	3547269	3547362
chr19_+_40871763_40871837_40854606_40854675_40872325_40872417	ENSG00000105223	PLD3	chr19	+	40871763	40871837	40854606	40854675	40872325	40872417
chr19_+_41128854_41128926_41128305_41128572_41129508_41129637	ENSG00000090006	LTBP4	chr19	+	41128854	41128926	41128305	41128572	41129508	41129637
chr19_+_49605370_49605430_49604646_49604728_49607890_49607992	ENSG00000104852	SNRNP70	chr19	+	49605370	49605430	49604646	49604728	49607890	49607992
chr19_+_49605370_49605442_49604646_49604728_49607890_49607992	ENSG00000104852	SNRNP70	chr19	+	49605370	49605442	49604646	49604728	49607890	49607992
chr19_+_49605370_49606844_49604646_49604728_49607890_49607992	ENSG00000104852	SNRNP70	chr19	+	49605370	49606844	49604646	49604728	49607890	49607992
chr19_-_5218797_5218809_5218430_5218543_5219320_5219478	ENSG00000105426	PTPRS	chr19	-	5218797	5218809	5218430	5218543	5219320	5219478
chr19_-_55967002_55967212_55966626_55966697_55967715_55967856	ENSG00000063241	ISOC2	chr19	-	55967002	55967212	55966626	55966697	55967715	55967856
chr19_+_6746039_6746207_6744810_6745005_6746462_6746572	ENSG00000125733	TRIP10	chr19	+	6746039	6746207	6744810	6745005	6746462	6746572
chr1_-_9816538_9816568_9815171_9815367_9833329_9833452	ENSG00000171603	CLSTN1	chr1	-	9816538	9816568	9815171	9815367	9833329	9833452
chr20_+_25187711_25188033_25176328_25176503_25190484_25190561	ENSG00000197586	ENTPD6	chr20	+	25187711	25188033	25176328	25176503	25190484	25190561
chr20_-_34301623_34301779_34300940_34301018_34302106_34302311	ENSG00000131051	RBM39	chr20	-	34301623	34301779	34300940	34301018	34302106	34302311
chr20_-_36149720_36149853_36145819_36147752_36156194_36156333	ENSG00000166619	BLCAP	chr20	-	36149720	36149853	36145819	36147752	36156194	36156333
chr20_+_42087792_42087957_42087000_42087149_42088410_42088535	ENSG00000124193	SRSF6	chr20	+	42087792	42087957	42087000	42087149	42088410	42088535
chr20_+_42087792_42088060_42087000_42087149_42088410_42088535	ENSG00000124193	SRSF6	chr20	+	42087792	42088060	42087000	42087149	42088410	42088535
chr20_+_42694351_42694550_42682938_42683166_42695369_42695497	ENSG00000124191	TOX2	chr20	+	42694351	42694550	42682938	42683166	42695369	42695497
chr20_+_42694351_42694747_42682938_42683166_42695369_42695497	ENSG00000124191	TOX2	chr20	+	42694351	42694747	42682938	42683166	42695369	42695497
chr20_+_57473995_57474040_57470666_57470739_57478582_57478640	ENSG00000087460	GNAS	chr20	+	57473995	57474040	57470666	57470739	57478582	57478640
chr21_-_27369674_27369731_27354656_27354790_27394155_27394358	ENSG00000142192	APP	chr21	-	27369674	27369731	27354656	27354790	27394155	27394358
chr2_+_136399105_136399360_136396465_136396692_136402948_136403097	ENSG00000048991	R3HDM1	chr2	+	136399105	136399360	136396465	136396692	136402948	136403097
chr21_-_40717755_40719218_40717071_40717200_40719304_40719409	ENSG00000205581	HMGN1	chr21	-	40717755	40719218	40717071	40717200	40719304	40719409
chr21_+_44323291_44324386_44317036_44317157_44328973_44329215	ENSG00000160194	NDUFV3	chr21	+	44323291	44324386	44317036	44317157	44328973	44329215
chr21_+_47545109_47545225_47544798_47544834_47545378_47545531	ENSG00000142173	COL6A2	chr21	+	47545109	47545225	47544798	47544834	47545378	47545531
chr2_-_188394090_188394212_188368374_188368497_188418926_188419076	ENSG00000003436	TFPI	chr2	-	188394090	188394212	188368374	188368497	188418926	188419076
chr2_+_191777918_191778090_191774988_191775047_191785749_191785782	ENSG00000115419	GLS	chr2	+	191777918	191778090	191774988	191775047	191785749	191785782
chr2_+_192265474_192265561_192265107_192265194_192267357_192267444	ENSG00000128641	MYO1B	chr2	+	192265474	192265561	192265107	192265194	192267357	192267444
chr2_+_192265474_192265561_192265107_192265194_192272840_192272915	ENSG00000128641	MYO1B	chr2	+	192265474	192265561	192265107	192265194	192272840	192272915
chr2_+_192267357_192267444_192265107_192265194_192272840_192272915	ENSG00000128641	MYO1B	chr2	+	192267357	192267444	192265107	192265194	192272840	192272915
chr2_-_20478343_20478580_20462953_20463221_20482707_20482992	ENSG00000055917	PUM2	chr2	-	20478343	20478580	20462953	20463221	20482707	20482992
chr2_-_216245533_216245803_216243927_216244040_216246934_216247048	ENSG00000115414	FN1	chr2	-	216245533	216245803	216243927	216244040	216246934	216247048
chr2_-_216257653_216257926_216256354_216256537_216259250_216259442	ENSG00000115414	FN1	chr2	-	216257653	216257926	216256354	216256537	216259250	216259442
chr2_-_216257800_216257924_216256354_216256537_216259250_216259442	ENSG00000115414	FN1	chr2	-	216257800	216257924	216256354	216256537	216259250	216259442
chr2_-_216257800_216257926_216256354_216256537_216259250_216259442	ENSG00000115414	FN1	chr2	-	216257800	216257926	216256354	216256537	216259250	216259442
chr2_+_232655656_232655883_232653264_232653442_232656442_232656518	ENSG00000144524	COPS7B	chr2	+	232655656	232655883	232653264	232653442	232656442	232656518
chr2_+_232655660_232655883_232653264_232653442_232656442_232656496	ENSG00000144524	COPS7B	chr2	+	232655660	232655883	232653264	232653442	232656442	232656496
chr2_-_238287278_238287878_238285414_238285987_238289557_238290142	ENSG00000163359	COL6A3	chr2	-	238287278	238287878	238285414	238285987	238289557	238290142
chr2_-_238296224_238296316_238289557_238290142_238305369_238305490	ENSG00000163359	COL6A3	chr2	-	238296224	238296316	238289557	238290142	238305369	238305490
chr2_-_238303229_238303847_238289557_238290142_238305369_238305490	ENSG00000163359	COL6A3	chr2	-	238303229	238303847	238289557	238290142	238305369	238305490
chr2_-_238303229_238303847_238296224_238296827_238305369_238305490	ENSG00000163359	COL6A3	chr2	-	238303229	238303847	238296224	238296827	238305369	238305490
chr2_+_238659842_238659914_238657841_238657967_238661951_238662122	ENSG00000124831	LRRFIP1	chr2	+	238659842	238659914	238657841	238657967	238661951	238662122
chr2_+_242688279_242689344_242684123_242684292_242689565_242689709	ENSG00000180902	D2HGDH	chr2	+	242688279	242689344	242684123	242684292	242689565	242689709
chr22_-_50895462_50895540_50894920_50895102_50897683_50897839	ENSG00000100241	SBF1	chr22	-	50895462	50895540	50894920	50895102	50897683	50897839
chr2_-_38976039_38976315_38975720_38975795_38976670_38976847	ENSG00000115875	SRSF7	chr2	-	38976039	38976315	38975720	38975795	38976670	38976847
chr2_-_38976039_38976488_38975720_38975795_38976670_38976847	ENSG00000115875	SRSF7	chr2	-	38976039	38976488	38975720	38975795	38976670	38976847
chr2_-_55252221_55254621_55214626_55214834_55255299_55255356	ENSG00000115310	RTN4	chr2	-	55252221	55254621	55214626	55214834	55255299	55255356
chr2_+_61410681_61410797_61408454_61408540_61411846_61411935	ENSG00000173209	AHSA2	chr2	+	61410681	61410797	61408454	61408540	61411846	61411935
chr2_-_61761557_61761789_61760906_61761038_61764696_61764722	ENSG00000082898	XPO1	chr2	-	61761557	61761789	61760906	61761038	61764696	61764722
chr2_-_61761692_61761813_61760906_61761038_61764696_61764775	ENSG00000082898	XPO1	chr2	-	61761692	61761813	61760906	61761038	61764696	61764775
chr2_-_70528539_70528735_70527971_70528112_70529056_70529188	ENSG00000035141	FAM136A	chr2	-	70528539	70528735	70527971	70528112	70529056	70529188
chr2_-_75749490_75749613_75745181_75745334_75788382_75788424	ENSG00000115363	EVA1A	chr2	-	75749490	75749613	75745181	75745334	75788382	75788424
chr2_-_9547558_9547713_9546788_9547034_9548241_9548330	ENSG00000119185	ITGB1BP1	chr2	-	9547558	9547713	9546788	9547034	9548241	9548330
chr2_-_9547577_9547713_9546789_9547034_9548241_9548334	ENSG00000119185	ITGB1BP1	chr2	-	9547577	9547713	9546789	9547034	9548241	9548334
chr2_-_9547577_9547727_9546788_9547034_9548241_9548334	ENSG00000119185	ITGB1BP1	chr2	-	9547577	9547727	9546788	9547034	9548241	9548334
chr3_+_152017193_152018156_151985828_151986881_152132729_152132900	ENSG00000152601	MBNL1	chr3	+	152017193	152018156	151985828	151986881	152132729	152132900
chr3_+_152173330_152173366_152165408_152165562_152174055_152174150	ENSG00000152601	MBNL1	chr3	+	152173330	152173366	152165408	152165562	152174055	152174150
chr3_+_183898432_183898438_183897956_183898039_183898636_183898669	ENSG00000161203	AP2M1	chr3	+	183898432	183898438	183897956	183898039	183898636	183898669
chr3_+_186506098_186506205_186505591_186505671_186506913_186507670	ENSG00000156976	EIF4A2	chr3	+	186506098	186506205	186505591	186505671	186506913	186507670
chr3_+_186506098_186506209_186505591_186505671_186506913_186507080	ENSG00000156976	EIF4A2	chr3	+	186506098	186506209	186505591	186505671	186506913	186507080
chr3_-_25761504_25761682_25760603_25761126_25770623_25770809	ENSG00000151092	NGLY1	chr3	-	25761504	25761682	25760603	25761126	25770623	25770809
chr3_-_42605256_42605372_42605014_42605178_42610356_42610565	ENSG00000093183	SEC22C	chr3	-	42605256	42605372	42605014	42605178	42610356	42610565
chr3_+_48962150_48962272_48960180_48960244_48964894_48965246	ENSG00000177479	ARIH2	chr3	+	48962150	48962272	48960180	48960244	48964894	48965246
chr3_+_48962150_48962404_48960180_48960244_48964894_48965246	ENSG00000177479	ARIH2	chr3	+	48962150	48962404	48960180	48960244	48964894	48965246
chr3_-_49463315_49463429_49462799_49462871_49463684_49463861	ENSG00000145029	NICN1	chr3	-	49463315	49463429	49462799	49462871	49463684	49463861
chr3_-_50602896_50603292_50599152_50599178_50604893_50605111	ENSG00000088543	C3orf18	chr3	-	50602896	50603292	50599152	50599178	50604893	50605111
chr3_-_88106340_88106442_88104563_88105149_88107168_88107373	ENSG00000163320	CGGBP1	chr3	-	88106340	88106442	88104563	88105149	88107168	88107373
chr3_+_9495688_9495785_9495422_9495552_9506108_9506638	ENSG00000168137	SETD5	chr3	+	9495688	9495785	9495422	9495552	9506108	9506638
chr4_-_103748748_103748898_103747641_103747793_103749100_103749186	ENSG00000109332	UBE2D3	chr4	-	103748748	103748898	103747641	103747793	103749100	103749186
chr4_+_119200098_119200292_119199912_119199947_119200543_119200586	ENSG00000269893	SNHG8	chr4	+	119200098	119200292	119199912	119199947	119200543	119200586
chr4_+_119200261_119200292_119199909_119199947_119200543_119200586	ENSG00000269893	SNHG8	chr4	+	119200261	119200292	119199909	119199947	119200543	119200586
chr4_-_2256885_2257078_2254134_2254249_2259708_2259738	ENSG00000123933	MXD4	chr4	-	2256885	2257078	2254134	2254249	2259708	2259738
chr4_-_2256885_2257082_2254134_2254249_2259708_2259738	ENSG00000123933	MXD4	chr4	-	2256885	2257082	2254134	2254249	2259708	2259738
chr4_+_26364067_26364250_26322408_26322437_26387974_26388013	ENSG00000168214	RBPJ	chr4	+	26364067	26364250	26322408	26322437	26387974	26388013
chr4_+_48833243_48833513_48833025_48833069_48834636_48834699	ENSG00000109180	OCIAD1	chr4	+	48833243	48833513	48833025	48833069	48834636	48834699
chr4_+_726188_726287_724758_724899_727460_727578	ENSG00000185619	PCGF3	chr4	+	726188	726287	724758	724899	727460	727578
chr4_-_83276047_83276154_83274986_83275307_83276456_83276554	ENSG00000138668	HNRNPD	chr4	-	83276047	83276154	83274986	83275307	83276456	83276554
chr4_-_83346715_83346820_83345781_83346036_83347189_83347282	ENSG00000152795	HNRPDL	chr4	-	83346715	83346820	83345781	83346036	83347189	83347282
chr4_-_83763292_83763634_83750152_83750211_83765538_83765662	ENSG00000138674	SEC31A	chr4	-	83763292	83763634	83750152	83750211	83765538	83765662
chr4_-_83763337_83763634_83750152_83750211_83765538_83765662	ENSG00000138674	SEC31A	chr4	-	83763337	83763634	83750152	83750211	83765538	83765662
chr5_+_102309819_102310140_102296861_102296933_102323221_102323275	ENSG00000145730	PAM	chr5	+	102309819	102310140	102296861	102296933	102323221	102323275
chr5_+_102309819_102310140_102296861_102296933_102325975_102326105	ENSG00000145730	PAM	chr5	+	102309819	102310140	102296861	102296933	102325975	102326105
chr5_+_102323221_102323275_102296861_102296933_102325975_102326105	ENSG00000145730	PAM	chr5	+	102323221	102323275	102296861	102296933	102325975	102326105
chr5_+_102323221_102323275_102309819_102310140_102325975_102326105	ENSG00000145730	PAM	chr5	+	102323221	102323275	102309819	102310140	102325975	102326105
chr5_-_110843026_110843140_110842027_110842077_110848082_110848233	ENSG00000164211	STARD4	chr5	-	110843026	110843140	110842027	110842077	110848082	110848233
chr5_-_114605399_114605495_114604578_114604697_114606909_114607323	ENSG00000164221	CCDC112	chr5	-	114605399	114605495	114604578	114604697	114606909	114607323
chr5_-_131562389_131562914_131554237_131554337_131563482_131563508	ENSG00000072682	P4HA2	chr5	-	131562389	131562914	131554237	131554337	131563482	131563508
chr5_-_131562624_131562914_131554237_131554337_131563482_131563532	ENSG00000072682	P4HA2	chr5	-	131562624	131562914	131554237	131554337	131563482	131563532
chr5_-_131562778_131562914_131554237_131554337_131563482_131563550	ENSG00000072682	P4HA2	chr5	-	131562778	131562914	131554237	131554337	131563482	131563550
chr5_-_131562778_131562951_131554237_131554337_131563482_131563512	ENSG00000072682	P4HA2	chr5	-	131562778	131562951	131554237	131554337	131563482	131563512
chr5_+_138941828_138941992_138940750_138941400_138979956_138980020	ENSG00000131508	UBE2D2	chr5	+	138941828	138941992	138940750	138941400	138979956	138980020
chr5_-_139680000_139680167_139660544_139661118_139682625_139682671	ENSG00000113068	PFDN1	chr5	-	139680000	139680167	139660544	139661118	139682625	139682671
chr5_+_34813678_34813765_34812284_34812313_34814687_34814774	ENSG00000039560	RAI14	chr5	+	34813678	34813765	34812284	34812313	34814687	34814774
chr5_+_35874550_35874644_35873302_35873750_35875613_35875623	ENSG00000168685	IL7R	chr5	+	35874550	35874644	35873302	35873750	35875613	35875623
chr5_+_7873485_7873639_7870882_7871036_7875370_7875488	ENSG00000124275	MTRR	chr5	+	7873485	7873639	7870882	7871036	7875370	7875488
chr5_+_82815167_82818128_82807921_82808215_82832825_82838087	ENSG00000038427	VCAN	chr5	+	82815167	82818128	82807921	82808215	82832825	82838087
chr5_+_96062457_96062563_96058342_96058402_96063192_96063234	ENSG00000153113	CAST	chr5	+	96062457	96062563	96058342	96058402	96063192	96063234
chr5_+_96062497_96062563_96058342_96058402_96063192_96063234	ENSG00000153113	CAST	chr5	+	96062497	96062563	96058342	96058402	96063192	96063234
chr6_+_123116821_123117035_123110314_123110603_123117968_123118113	ENSG00000172594	SMPDL3A	chr6	+	123116821	123117035	123110314	123110603	123117968	123118113
chr6_+_31804200_31804294_31803187_31803228_31805012_31805212	ENSG00000204387	C6orf48	chr6	+	31804200	31804294	31803187	31803228	31805012	31805212
chr6_+_34204980_34205094_34204649_34204740_34208513_34208659	ENSG00000137309	HMGA1	chr6	+	34204980	34205094	34204649	34204740	34208513	34208659
chr6_+_36567597_36568053_36566625_36566760_36568928_36568967	ENSG00000112081	SRSF3	chr6	+	36567597	36568053	36566625	36566760	36568928	36568967
chr6_-_56333779_56333797_56330875_56330993_56334680_56334755	ENSG00000151914	DST	chr6	-	56333779	56333797	56330875	56330993	56334680	56334755
chr6_+_86200225_86200375_86199211_86199317_86201694_86201895	ENSG00000135318	NT5E	chr6	+	86200225	86200375	86199211	86199317	86201694	86201895
chr6_-_86248555_86248582_86246509_86246642_86251702_86251761	ENSG00000135317	SNX14	chr6	-	86248555	86248582	86246509	86246642	86251702	86251761
chr7_+_102036423_102036984_102016658_102016769_102038066_102038145	ENSG00000128563	PRKRIP1	chr7	+	102036423	102036984	102016658	102016769	102038066	102038145
chr7_-_107642571_107642829_107642002_107642178_107643293_107643416	ENSG00000091136	LAMB1	chr7	-	107642571	107642829	107642002	107642178	107643293	107643416
chr7_+_116165681_116165837_116165054_116165146_116166578_116166743	ENSG00000105974	CAV1	chr7	+	116165681	116165837	116165054	116165146	116166578	116166743
chr7_+_116165681_116165859_116165054_116165146_116166578_116166743	ENSG00000105974	CAV1	chr7	+	116165681	116165859	116165054	116165146	116166578	116166743
chr7_+_134343099_134343420_134331582_134331689_134346198_134346860	ENSG00000172331	BPGM	chr7	+	134343099	134343420	134331582	134331689	134346198	134346860
chr7_-_23383336_23383472_23381714_23381808_23385558_23385780	ENSG00000136231	IGF2BP3	chr7	-	23383336	23383472	23381714	23381808	23385558	23385780
chr7_-_26231041_26231270_26230612_26230748_26232114_26232197	ENSG00000122566	HNRNPA2B1	chr7	-	26231041	26231270	26230612	26230748	26232114	26232197
chr7_-_5460690_5461120_5434070_5434226_5463071_5463177	ENSG00000182095	TNRC18	chr7	-	5460690	5461120	5434070	5434226	5463071	5463177
chr7_+_56146634_56146732_56146056_56146201_56147220_56147429	ENSG00000129103	SUMF2	chr7	+	56146634	56146732	56146056	56146201	56147220	56147429
chr8_-_11721884_11721972_11710837_11710988_11725509_11725549	ENSG00000164733	CTSB	chr8	-	11721884	11721972	11710837	11710988	11725509	11725549
chr8_-_144996671_145000052_144989320_144996563_145000951_145001050	ENSG00000178209	PLEC	chr8	-	144996671	145000052	144989320	144996563	145000951	145001050
chr8_-_25307895_25307997_25303644_25303766_25315714_25315796	ENSG00000104756	KCTD9	chr8	-	25307895	25307997	25303644	25303766	25315714	25315796
chr8_-_62556503_62556560_62555944_62555992_62557158_62557191	ENSG00000198363	ASPH	chr8	-	62556503	62556560	62555944	62555992	62557158	62557191
chr8_-_62559308_62559437_62557158_62557191_62563608_62563683	ENSG00000198363	ASPH	chr8	-	62559308	62559437	62557158	62557191	62563608	62563683
chr8_-_67834848_67834960_67834558_67834627_67837671_67837831	ENSG00000245910	SNHG6	chr8	-	67834848	67834960	67834558	67834627	67837671	67837831
chr8_-_74876721_74876864_74871999_74872053_74884479_74884522	ENSG00000154582	TCEB1	chr8	-	74876721	74876864	74871999	74872053	74884479	74884522
chr8_+_90775056_90775210_90769974_90770461_90777568_90777724	ENSG00000104312	RIPK2	chr8	+	90775056	90775210	90769974	90770461	90777568	90777724
chr9_-_117808688_117808961_117804497_117804620_117835881_117836145	ENSG00000041982	TNC	chr9	-	117808688	117808961	117804497	117804620	117835881	117836145
chr9_-_117810538_117810811_117808688_117808961_117819431_117819704	ENSG00000041982	TNC	chr9	-	117810538	117810811	117808688	117808961	117819431	117819704
chr9_-_117819431_117819704_117804497_117804620_117835881_117836145	ENSG00000041982	TNC	chr9	-	117819431	117819704	117804497	117804620	117835881	117836145
chr9_-_117826074_117826347_117804497_117804620_117835881_117836145	ENSG00000041982	TNC	chr9	-	117826074	117826347	117804497	117804620	117835881	117836145
chr9_-_131035063_131035144_131030698_131030803_131036128_131036132	ENSG00000167110	GOLGA2	chr9	-	131035063	131035144	131030698	131030803	131036128	131036132
chr9_-_136338536_136338722_136338226_136338372_136339101_136339210	ENSG00000160326	SLC2A6	chr9	-	136338536	136338722	136338226	136338372	136339101	136339210
chr9_+_32386368_32386436_32384617_32384733_32405482_32405601	ENSG00000122729	ACO1	chr9	+	32386368	32386436	32384617	32384733	32405482	32405601
chr9_-_74978385_74978522_74975543_74975703_74979611_74980113	ENSG00000107372	ZFAND5	chr9	-	74978385	74978522	74975543	74975703	74979611	74980113
chr9_+_91077410_91077664_91063855_91063904_91083286_91083520	ENSG00000106723	SPIN1	chr9	+	91077410	91077664	91063855	91063904	91083286	91083520
chr9_+_95874160_95874220_95872849_95873003_95874499_95874571	ENSG00000165233	C9orf89	chr9	+	95874160	95874220	95872849	95873003	95874499	95874571
chrX_-_108939372_108939425_108926364_108926895_108976367_108976531	ENSG00000068366	ACSL4	chrX	-	108939372	108939425	108926364	108926895	108976367	108976531
chrX_-_119572930_119573148_119565102_119565317_119575584_119575749	ENSG00000005893	LAMP2	chrX	-	119572930	119573148	119565102	119565317	119575584	119575749
chrX_-_119572970_119573148_119565102_119565317_119575584_119575749	ENSG00000005893	LAMP2	chrX	-	119572970	119573148	119565102	119565317	119575584	119575749
chrX_-_153585618_153585642_153583192_153583440_153585801_153585991	ENSG00000196924	FLNA	chrX	-	153585618	153585642	153583192	153583440	153585801	153585991
chrX_-_38146346_38147294_38135839_38136025_38150211_38150277	ENSG00000156313	RPGR	chrX	-	38146346	38147294	38135839	38136025	38150211	38150277
chrX_+_48434202_48434471_48433948_48434055_48434701_48434807	ENSG00000102317	RBM3	chrX	+	48434202	48434471	48433948	48434055	48434701	48434807
chrX_+_48434309_48434471_48433948_48434055_48434701_48434807	ENSG00000102317	RBM3	chrX	+	48434309	48434471	48433948	48434055	48434701	48434807
chrX_+_9621584_9621729_9608312_9608400_9622254_9622362	ENSG00000101849	TBL1X	chrX	+	9621584	9621729	9608312	9608400	9622254	9622362

## Sheet: Table S8 - RNA binding p-value
#RNA Binding information with motif scanning and eCLIP data. Each column is the associated pvalue or FDR adjusted pvalue. Label represents this RBP is predicted as the regulator (positive) or not(negative)
RBP	RBPmap.Pvalue	eCLIP.Pvalue	Fisher.Combining.Pvalue	Fisher.FDR.ADJ	DOWN.Pvalue	UP.Pvalue	Label
HNRNPH2	0.0094979	NA	0.0537266	0.19666	0.102141	0.897859	negative
SRSF1	0.000615257	0.00999819	7.99617e-05	0.00119327	1.11666e-10	1	positive
RBM5	0.0387439	NA	0.164692	0.360004	0.0168459	0.983154	negative
SRSF7	0.00037753	6.2796e-05	4.39949e-07	2.03226e-05	1.2524e-11	1	positive
PUM1	0.0246196	NA	0.115816	0.325627	0.295948	0.704052	negative
CELF1	0.00247341	NA	0.0173192	0.119997	0.29292	0.70708	negative
HNRNPA1	0.00959752	0.5	0.0304212	0.1645	1.09623e-07	1	negative
SRSF2	0.00212668	NA	0.0152126	0.113509	1.88636e-13	1	negative
HNRNPA0	0.389148	NA	0.756424	0.946751	0.000230335	0.99977	negative
ELAVL1	0.0387439	NA	0.164692	0.360004	0.00631356	0.993686	negative
HNRNPH3	0.0094979	NA	0.0537266	0.19666	1.94326e-06	0.999998	negative
HNRNPK	0.0387439	0.00554891	0.00203053	0.0218846	1.46478e-09	1	positive
FMR1	0.069686	0.571395	0.16817	0.362499	0.00309727	0.996903	negative
HNRNPD	0.0388869	NA	0.165157	0.360004	6.01448e-06	0.999994	negative
HNRNPM	0.142985	0.00189697	0.00249879	0.025514	7.11335e-08	1	positive
HNRNPH1	0.0094979	NA	0.0537266	0.19666	5.92339e-10	1	negative
KHSRP	0.00369442	0.000149117	8.49031e-06	0.000183013	0.00844216	0.991558	negative
ELAVL2	0.100281	NA	0.330905	0.563119	0.0665504	0.93345	negative
HNRNPF	0.0094979	NA	0.0537266	0.19666	3.88141e-07	1	negative
HNRNPU	0.0387439	0.5	0.0957735	0.291978	1.55876e-09	1	negative
PCBP2	0.00351278	6.79912e-07	4.98041e-08	4.831e-06	0.010509	0.989491	negative
CMTR1	0.936291	NA	0.997926	1	0.0609628	0.939037	negative
RBMX	0.240577	NA	0.583331	0.832031	2.19185e-13	1	negative
PTBP1	0.000924162	7.71433e-06	1.40868e-07	9.10947e-06	2.45016e-06	0.999998	positive
ZRANB2	0.258812	0.00769052	0.0143695	0.111508	0.0304427	0.969557	negative
NXF1	0.031376	NA	0.139991	0.348182	0.761257	0.238743	negative
KHDRBS1	0.5	0.124538	0.235145	0.456182	2.90979e-09	1	negative
TRA2B	0.107225	NA	0.346639	0.579724	1.59593e-16	1	negative
IGHMBP2	0.27943	NA	0.635704	0.850529	0.999891	0.00010873	negative
SRSF10	0.0356019	NA	0.154347	0.352274	1.92935e-06	0.999998	negative
AKAP1	0.885861	NA	0.993223	1	0.91178	0.0882204	negative
YBX1	0.208691	NA	0.53569	0.769806	0.210724	0.789276	negative
NOVA1	0.00687581	NA	0.0411156	0.189042	0.000159342	0.999841	negative
SRP54	0.0339691	NA	0.148863	0.352274	0.964177	0.0358228	negative
AGO1	0.0999045	NA	0.330039	0.563119	0.00753894	0.992461	negative
PUM2	0.0257778	0.860188	0.10663	0.313428	0.713896	0.286104	negative
DAZAP1	0.00481835	NA	0.0305258	0.1645	2.21831e-07	1	negative
NONO	0.362422	0.0145442	0.0329209	0.172612	0.00154317	0.998457	negative
PCBP1	0.00351278	NA	0.0233647	0.148264	0.433352	0.566648	negative
PPIE	0.329565	NA	0.695376	0.899353	0.343166	0.656834	negative
RC3H1	0.0499585	NA	0.199662	0.412069	0.767653	0.232347	negative
SSB	0.0070339	NA	0.0419011	0.189042	0.453666	0.546334	negative
FUS	0.142985	NA	0.421094	0.664164	0.00824186	0.991758	negative
SRSF3	0.00848706	NA	0.0489637	0.19666	5.9456e-15	1	negative
RBFOX2	0.00369442	2.22506e-05	1.42327e-06	4.6019e-05	3.32198e-07	1	positive
DDX19B	0.5	NA	0.846574	1	3.55914e-08	1	negative
PTBP2	0.00629335	NA	0.0381897	0.189042	2.68832e-05	0.999973	negative
SF1	1.31748e-05	NA	0.000161223	0.00195483	0.045974	0.954026	negative
ZNF346	0.0174875	NA	0.0882466	0.281655	0.376498	0.623502	negative
LIN28A	0.637632	NA	0.924562	1	0.730645	0.269355	negative
ZFP36	0.0450136	NA	0.184591	0.39309	0.0592555	0.940745	negative
SYNCRIP	0.27943	NA	0.635704	0.850529	3.01895e-06	0.999997	negative
ERI1	0.0352531	NA	0.153182	0.352274	1.2099e-05	0.999988	negative
SRSF4	0.58352	NA	0.897848	1	0.00516979	0.99483	negative
HNRNPA2B1	0.147209	NA	0.429246	0.670323	4.20271e-11	1	negative
EIF4A3	0.5	NA	0.846574	1	0.317613	0.682387	negative
CELF2	0.0175654	NA	0.0885615	0.281655	0.163706	0.836294	negative
U2AF2	0.591662	1.49125e-05	0.000111508	0.00154519	0.2009	0.7991	negative
MBNL1	0.0213882	NA	0.103624	0.309278	2.09834e-05	0.999979	negative
HNRNPC	0.142985	0.0032493	0.00403011	0.0390921	0.0151647	0.984835	negative
SRP19	0.0339691	NA	0.148863	0.352274	0.861371	0.138629	negative
CPEB1	0.828056	NA	0.984289	1	0.99705	0.0029503	negative
NUDT21	0.102283	NA	0.335489	0.565955	1.97501e-09	1	negative
ELAVL4	0.27943	NA	0.635704	0.850529	0.755266	0.244734	negative
ZFP36L2	0.945819	NA	0.998505	1	2.50365e-05	0.999975	negative
PHAX	0.188807	NA	0.503554	0.734507	0.0184034	0.981597	negative
TRA2A	0.738034	0.00174712	0.00986875	0.0797724	0.173652	0.826348	negative
HNRNPL	0.00840816	NA	0.048587	0.19666	2.92986e-06	0.999997	negative
CPEB4	0.0233817	NA	0.111199	0.320556	1	4.66071e-13	negative
SRSF6	0.0457969	NA	0.187014	0.39309	1.22579e-06	0.999999	negative
QKI	0.00095712	8.38615e-07	1.76127e-08	3.41687e-06	2.36512e-07	1	positive
NOVA2	0.142985	NA	0.421094	0.664164	0.866413	0.133587	negative
RBFOX1	0.00369442	NA	0.0243866	0.148264	0.953946	0.0460544	negative
RBM25	0.0119576	NA	0.0648866	0.228873	0.0506596	0.94934	negative
SRP68	0.0070339	NA	0.0419011	0.189042	0.484945	0.515055	negative
HNRNPDL	0.658056	NA	0.933429	1	1.90023e-09	1	negative
IFIH1	0.13002	NA	0.395269	0.633737	0.751738	0.248262	negative
SRSF5	0.0270426	NA	0.124676	0.335451	0.927192	0.0728084	negative
SRSF9	0.0395979	0.225547	0.0510705	0.19666	0.615438	0.384562	negative
SFPQ	0.1139	0.249692	0.129685	0.335451	3.06164e-13	1	negative
SRSF11	0.719452	NA	0.956343	1	0.00706104	0.992939	negative
PABPC1	0.27943	NA	0.635704	0.850529	0.264735	0.735265	negative
KHDRBS3	0.718379	NA	0.955989	1	0.287306	0.712694	negative
TARDBP	0.0563041	0.148602	0.0483898	0.19666	0.0451114	0.954889	negative
RBM4	0.268966	NA	0.622164	0.850529	0.86874	0.13126	negative
YTHDC1	0.00694524	NA	0.041461	0.189042	0.00725233	0.992748	negative
TIA1	0.840499	1.45302e-07	2.06615e-06	5.7262e-05	1.291e-05	0.999987	negative
SNRPA	0.0281064	NA	0.128496	0.335451	1.14897e-13	1	negative
PIWIL1	0.0277776	NA	0.127319	0.335451	0.905346	0.0946541	negative
SRP14	0.0279818	NA	0.12805	0.335451	0.995241	0.00475893	negative
ELAVL3	0.389148	NA	0.756424	0.946751	0.994355	0.0056451	negative
CSTF2	0.343828	0.102784	0.153473	0.352274	0.441798	0.558202	negative
TIAL1	0.0899896	NA	0.30669	0.536017	0.00268053	0.997319	negative
AGO2	0.0646111	NA	0.241605	0.464073	0.929989	0.0700113	negative
HNRNPLL	0.00840816	NA	0.048587	0.19666	1.78362e-05	0.999982	negative
F2	0.287115	NA	0.645398	0.857583	0.385358	0.614642	negative
KHDRBS2	0.718379	NA	0.955989	1	0.0743882	0.925612	negative
OAS1	0.061266	NA	0.232353	0.456182	0.98153	0.0184698	negative
ESRP1	0.673308	NA	0.939637	1	1	6.65103e-08	negative
XPO5	0.00254086	0.000373468	1.41086e-05	0.000273708	0.772457	0.227543	negative
IGF2BP3	0.5	0.321818	0.454876	0.689422	0.320271	0.679729	negative
RNASEL	0.808688	NA	0.980407	1	0.00898451	0.991015	negative
DHX9	0.00246609	NA	0.0172753	0.119997	2.75748e-06	0.999997	negative
HNRNPAB	0.926644	NA	0.997241	1	0.000277264	0.999723	negative
DDX58	0.0236914	NA	0.11236	0.320556	0.994749	0.00525073	negative
SUPV3L1	0.0192402	0.82965	0.0820081	0.269654	1	7.61666e-09	negative
ADAR	0.00425456	NA	0.0274835	0.161569	0.99993	6.97452e-05	negative
DHX58	0.0126914	NA	0.0681126	0.235962	0.143711	0.856289	negative
RBMY1A1	0.904864	NA	0.995324	1	NA	NA	negative
AARS	NA	0.5	0.846574	1	0.00973049	0.99027	negative
AGGF1	NA	0.163568	0.459712	0.691349	0.0361404	0.96386	negative
AKAP8L	NA	0.116303	0.366536	0.597546	1	2.77367e-07	negative
AUH	NA	1	1	1	0.869413	0.130587	negative
BCCIP	NA	1	1	1	0.797091	0.202909	negative
BUD13	NA	0.262318	0.613352	0.84993	1.58717e-08	1	negative
CDC40	NA	0.000120232	0.00120545	0.0137564	0.166293	0.833707	negative
CPSF6	NA	0.813272	0.981367	1	9.15169e-10	1	negative
CSTF2T	NA	0.116159	0.366225	0.597546	7.35339e-07	0.999999	negative
DDX24	NA	0.736451	0.961741	1	1	8.10236e-15	negative
DDX3X	NA	0.0730488	0.26419	0.494343	0.593543	0.406457	negative
DDX42	NA	0.0715052	0.260135	0.494343	0.0153763	0.984624	negative
DDX55	NA	0.0539899	0.211584	0.432077	0.999754	0.000245643	negative
DDX59	NA	0.0185956	0.092696	0.290049	0.999925	7.46821e-05	negative
DDX6	NA	0.573604	0.892422	1	0.310975	0.689025	negative
DGCR8	NA	0.750308	0.96585	1	2.34314e-09	1	negative
DHX30	NA	0.0308654	0.138219	0.348182	0.985326	0.0146736	negative
DKC1	NA	0.000660438	0.00549657	0.0507778	0.000416063	0.999584	negative
DROSHA	NA	0.109772	0.352297	0.58415	1.81879e-12	1	negative
EFTUD2	NA	0.0864873	0.298187	0.535088	0.262515	0.737485	negative
EIF3D	NA	0.0620379	0.234504	0.456182	0.7585	0.2415	negative
EIF4G2	NA	0.362603	0.730445	0.932278	1.91432e-12	1	negative
EWSR1	NA	0.0145442	0.0760744	0.25892	1.09968e-13	1	negative
FAM120A	NA	0.00868063	0.0498847	0.19666	0.000933098	0.999067	negative
FASTKD2	NA	0.0878924	0.301615	0.535088	0.11004	0.88996	negative
FKBP4	NA	0.186728	0.500077	0.734507	0.993177	0.0068232	negative
FTO	NA	0.148602	0.431909	0.670323	0.0632419	0.936758	negative
FUBP3	NA	0.17035	0.471853	0.698775	0.939035	0.0609649	negative
FXR1	NA	0.774453	0.972402	1	1.94134e-05	0.999981	negative
FXR2	NA	0.651896	0.930823	1	0.999997	3.49243e-06	negative
GEMIN5	NA	0.382046	0.749656	0.946751	0.527599	0.472401	negative
GNL3	NA	0.124538	0.383968	0.620748	0.438888	0.561112	negative
GPKOW	NA	0.00992	0.055683	0.200046	0.0468733	0.953127	negative
GRSF1	NA	0.312037	0.675445	0.879439	0.00164733	0.998353	negative
GRWD1	NA	0.0733619	0.265009	0.494343	0.553818	0.446182	negative
GTF2F1	NA	0.0195113	0.0963226	0.291978	0.709805	0.290195	negative
HLTF	NA	0.249692	0.596146	0.832031	9.34522e-05	0.999907	negative
HNRNPUL1	NA	2.1905e-06	3.07358e-05	0.000530228	4.75838e-21	1	positive
IGF2BP1	NA	0.153406	0.440991	0.678986	0.40735	0.59265	negative
IGF2BP2	NA	0.0808777	0.28427	0.515406	1.22525e-08	1	negative
ILF3	NA	0.192047	0.508928	0.736806	2.45427e-09	1	negative
LARP4	NA	0.0774089	0.275471	0.508966	0.795662	0.204338	negative
LARP7	NA	0.0372665	0.159861	0.360004	0.00220042	0.9978	negative
LIN28B	NA	0.794976	0.977378	1	0.92299	0.0770102	negative
LSM11	NA	0.0462603	0.18844	0.39309	0.00232205	0.997678	negative
METAP2	NA	0.35298	0.720554	0.925744	0.00250079	0.997499	negative
MTPAP	NA	0.623811	0.918192	1	0.274514	0.725486	negative
NCBP2	NA	0.000858254	0.00691805	0.0610046	0.991361	0.00863873	negative
NKRF	NA	0.0276358	0.126811	0.335451	0.999972	2.80398e-05	negative
NOL12	NA	0.0575376	0.221826	0.448273	0.0317899	0.96821	negative
NPM1	NA	0.750308	0.96585	1	0.005682	0.994318	negative
NSUN2	NA	1	1	1	0.905855	0.094145	negative
PPIG	NA	0.86691	0.990722	1	0.0496227	0.950377	negative
PPIL4	NA	0.249692	0.596146	0.832031	0.21779	0.78221	negative
PRPF8	NA	0.0328922	0.145203	0.352274	0.0346753	0.965325	negative
PUS1	NA	1	1	1	0.985832	0.0141676	negative
RBM15	NA	0.0037068	0.0244559	0.148264	0.417195	0.582805	negative
RBM22	NA	0.00107808	0.00844416	0.0712246	0.675455	0.324545	negative
RBM27	NA	0.312037	0.675445	0.879439	0.00347521	0.996525	negative
RPS11	NA	0.5	0.846574	1	0.0426102	0.95739	negative
RPS5	NA	2.34915e-06	3.27976e-05	0.000530228	0.0950923	0.904908	negative
SAFB2	NA	0.0308654	0.138219	0.348182	0.991205	0.00879486	negative
SBDS	NA	1	1	1	0.999966	3.41898e-05	negative
SERBP1	NA	0.0616908	0.233538	0.456182	0.00784215	0.992158	negative
SF3A3	NA	0.00597014	0.0365432	0.186562	7.62474e-06	0.999992	negative
SF3B1	NA	1.03034e-05	0.000128618	0.00166346	0.0141844	0.985816	negative
SF3B4	NA	0.0790262	0.279593	0.511708	0.292931	0.707069	negative
SLBP	NA	0.0886277	0.3034	0.535088	7.69319e-07	0.999999	negative
SLTM	NA	0.0344832	0.150598	0.352274	0.0434911	0.956509	negative
SMNDC1	NA	2.85079e-08	5.23778e-07	2.03226e-05	0.664059	0.335941	negative
SND1	NA	0.953506	0.998902	1	0.0599892	0.940011	negative
SUB1	NA	0.0983113	0.326356	0.563119	0.472109	0.527891	negative
SUGP2	NA	0.249692	0.596146	0.832031	0.33038	0.66962	negative
TAF15	NA	0.0153371	0.0794074	0.265604	0.262111	0.737889	negative
TBRG4	NA	0.299893	0.661063	0.872423	0.471382	0.528618	negative
TNRC6A	NA	0.5	0.846574	1	2.0422e-07	1	negative
TROVE2	NA	0.00344056	0.0229558	0.148264	0.936132	0.0638685	negative
U2AF1	NA	3.22888e-07	5.14876e-06	0.000124857	NA	NA	negative
UCHL5	NA	0.157088	0.447851	0.684118	0.0116207	0.988379	negative
UPF1	NA	0.698095	0.94899	1	0.355886	0.644114	negative
XRCC6	NA	0.17035	0.471853	0.698775	2.83295e-09	1	negative
XRN2	NA	0.00455371	0.0291065	0.1645	0.0295917	0.970408	negative
YBX3	NA	0.975202	0.99969	1	0.981232	0.0187676	negative
YWHAG	NA	0.5	0.846574	1	0.924298	0.0757023	negative
ZNF622	NA	0.72188	0.957138	1	1	1.3176e-08	negative

## Sheet: Table S9 - Enrichment of KD
# enrichment result of the knockdown experiments. RBPs were ranked according to the p-value from the enrichment result
RBPs	NumberOfSE	NumberOfDSE	SE_CS_SF	p
QKI	127978	2333	48	6.04215e-36
SRSF1	142603	5560	61	3.07241e-33
HNRNPK	127326	5047	60	6.48563e-32
PCBP1	126961	2945	47	3.25069e-30
PUM2	140623	1780	37	2.78307e-29
CPSF6	103288	1584	38	1.506e-27
HNRNPU	106016	2677	42	9.41965e-24
PTBP1	126927	2366	37	1.63758e-23
U2AF1	174734	9716	58	1.12188e-22
SUPV3L1	130903	1573	29	7.69133e-21
SSB	164910	1643	27	1.03227e-20
NCBP2	136486	3320	38	1.4094e-20
RBM22	165523	3356	35	2.47851e-20
IGF2BP3	114003	2329	35	2.93588e-20
DDX3X	133282	1858	30	3.77088e-20
SF3B1	114558	3643	42	4.82813e-20
DDX6	124462	1811	30	1.20611e-19
HNRNPC	120257	3779	41	2.21254e-19
HNRNPLL	102123	1756	31	1.18683e-18
HNRNPM	106221	1005	24	6.42653e-18
KHSRP	124225	1790	28	9.71072e-18
TIA1	116021	1308	25	2.92935e-17
PRPF8	106367	1973	30	8.26098e-17
TIAL1	106153	2461	33	8.43335e-17
IGF2BP1	115061	1373	25	1.07612e-16
BCCIP	124390	1109	22	2.94419e-16
UCHL5	86442	1016	24	7.52619e-16
HNRNPA1	98318	1075	23	1.70493e-15
PABPC1	119400	1772	26	1.71917e-15
CELF1	133075	1049	20	4.18724e-15
TARDBP	100418	1288	24	5.21489e-15
ZNF622	136843	873	18	1.72798e-14
SRSF7	122253	1836	25	1.93522e-14
AKAP1	127432	2193	26	5.22847e-14
SF3B4	149435	4077	32	5.34599e-14
TAF15	122032	2920	30	6.40599e-14
AUH	159262	936	17	6.46287e-14
SF3A3	200590	5879	33	6.53351e-14
DDX55	123331	1461	22	8.97512e-14
EIF4A3	166437	4334	31	9.42786e-14
FXR1	131080	1406	21	1.24563e-13
SRSF9	119912	2288	26	5.32965e-13
FUBP3	98789	1457	23	8.28883e-13
PCBP2	119072	1582	22	8.51269e-13
GPKOW	107294	1766	24	1.06581e-12
MTPAP	103076	1146	20	2.17594e-12
NONO	129407	1837	22	3.10255e-12
FTO	94497	2473	29	3.38742e-12
FUS	122246	935	17	4.01174e-12
RBM25	122001	3037	28	5.99056e-12
HNRNPL	129471	1766	21	1.11613e-11
SFPQ	85420	2824	31	3.76239e-11
PUM1	140273	1683	19	6.99173e-11
DKC1	120335	1121	17	8.40474e-11
SLTM	109506	523	13	1.22609e-10
YBX3	96332	481	13	2.07072e-10
AGO1	101837	410	12	2.27676e-10
DHX30	92462	485	13	3.74469e-10
RBM15	126145	906	14	1.76734e-09
EFTUD2	105209	901	15	1.90846e-09
SERBP1	99515	1016	16	2.6195e-09
IGF2BP2	124247	1556	17	6.98025e-09
FASTKD2	106676	405	10	2.38075e-08
GRWD1	107350	306	9	2.59471e-08
SND1	111324	331	9	3.73363e-08
AKAP8L	126049	677	11	6.12808e-08
GRSF1	111866	640	11	1.14167e-07
GEMIN5	95134	1290	16	1.28618e-07
LARP4	131913	1835	16	1.84064e-07
TBRG4	123511	1731	16	2.02591e-07
RBFOX2	78815	1576	19	2.32421e-07
EWSR1	129002	2096	17	2.82169e-07
SF1	92247	3188	25	4.77985e-07
PUS1	128906	869	11	5.78277e-07
NOL12	134101	1154	12	9.15943e-07
SAFB2	95197	1175	14	1.26614e-06
XRN2	121766	1306	13	1.50223e-06
SLBP	129438	1220	12	2.32622e-06
SRSF3	119748	2824	19	2.69081e-06
XRCC6	122613	808	10	3.5843e-06
RBM27	134344	1188	11	7.65751e-06
FKBP4	102845	228	6	1.37957e-05
PPIG	124285	628	8	2.53467e-05
ZRANB2	113389	579	8	2.7211e-05
DDX24	106319	402	7	3.04837e-05
SRP68	118908	314	6	3.69792e-05
LIN28B	119650	641	8	3.81936e-05
HNRNPD	108513	598	8	4.638e-05
TRA2A	109653	448	7	4.96932e-05
ADAR	97424	405	7	5.51387e-05
HNRNPF	106029	1200	11	7.09923e-05
FAM120A	91241	451	7	0.000160285
SMNDC1	117501	676	7	0.000402128
KHDRBS1	114073	894	8	0.000501386
PPIL4	95427	1027	9	0.00093184
EIF4G2	127686	883	7	0.00117508
HNRNPA2B1	125007	459	5	0.00167331
HLTF	112625	615	6	0.00173985
RPS5	121854	680	6	0.00194114
NSUN2	97335	1267	9	0.00335038
SUB1	105121	496	5	0.00485544
CSTF2	87538	271	4	0.00581933
SUGP2	122231	638	5	0.00736737
NKRF	123028	674	5	0.00896018
GTF2F1	114966	415	4	0.00988702
UPF1	126643	547	4	0.0179549
DDX19B	124867	864	5	0.0222644
SBDS	108014	507	4	0.0234593
HNRNPA0	106666	524	4	0.0271095
ILF3	112747	868	5	0.033029
TROVE2	87860	377	3	0.0764838
NPM1	84756	1963	9	0.0869288
AARS	124122	285	2	0.0978188
BUD13	108113	262	2	0.106973
LARP7	117398	641	3	0.130971
XPO5	106708	923	4	0.13841
CSTF2T	100208	291	2	0.143428
HNRNPAB	102220	454	2	0.270528
HNRNPUL1	80526	1963	6	0.486361
LSM11	117298	416	1	0.557085
FMR1	127537	486	1	0.58317

## Sheet: Table S10 - SNV Annotations
# annotation of directly protein-altering SNVs (stopgain and nonsynonymous) within the consistently ASE regions
Chr	Start	End	Ref	Alt	Func.refGene	Gene.refGene	GeneDetail.refGene	ExonicFunc.refGene	AAChange.refGene	Func.ensGene	Gene.ensGene	GeneDetail.ensGene	ExonicFunc.ensGene	AAChange.ensGene	avsnp147	CLINSIG	CLNDBN	CLNACC	CLNDSDB	CLNDSDBID
12	108958089	108958089	G	A	exonic	ISCU	.	nonsynonymous SNV	ISCU:NM_001301140:exon2:c.G149A:p.G50E,ISCU:NM_001301141:exon2:c.G149A:p.G50E,ISCU:NM_213595:exon2:c.G149A:p.G50E,ISCU:NM_014301:exon3:c.G74A:p.G25E	exonic	ENSG00000136003	.	nonsynonymous SNV	ENSG00000136003:ENST00000311893:exon2:c.G149A:p.G50E,ENSG00000136003:ENST00000431221:exon2:c.G149A:p.G50E,ENSG00000136003:ENST00000535729:exon2:c.G149A:p.G50E,ENSG00000136003:ENST00000539593:exon2:c.G149A:p.G50E,ENSG00000136003:ENST00000547005:exon2:c.G149A:p.G50E,ENSG00000136003:ENST00000338291:exon3:c.G74A:p.G25E,ENSG00000136003:ENST00000392807:exon3:c.G74A:p.G25E	rs267607190	Pathogenic	Myopathy_with_lactic_acidosis,_hereditary	RCV000000819.4	MedGen:OMIM:Orphanet	C1850718:255125:ORPHA43115
6	112020777	112020777	C	T	exonic	FYN	.	nonsynonymous SNV	FYN:NM_153047:exon6:c.G794A:p.R265H	exonic	ENSG00000010810	.	nonsynonymous SNV	ENSG00000010810:ENST00000538466:exon6:c.G794A:p.R265H,ENSG00000010810:ENST00000229470:exon8:c.G647A:p.R216H,ENSG00000010810:ENST00000368678:exon8:c.G794A:p.R265H,ENSG00000010810:ENST00000368682:exon9:c.G794A:p.R265H	rs367543109	not provided	not_provided	RCV000084663.1	MedGen	CN221809
9	117826128	117826128	C	T	exonic	TNC	.	nonsynonymous SNV	TNC:NM_002160:exon12:c.G3707A:p.R1236H	exonic	ENSG00000041982	.	nonsynonymous SNV	ENSG00000041982:ENST00000341037:exon11:c.G3707A:p.R1236H,ENSG00000041982:ENST00000350763:exon12:c.G3707A:p.R1236H,ENSG00000041982:ENST00000423613:exon12:c.G3707A:p.R1236H	rs147290484	Uncertain significance	not_provided	RCV000438777.1	MedGen	CN221809
X	119573020	119573020	G	C	exonic;exonic	LAMP2	.	nonsynonymous SNV;nonsynonymous SNV	LAMP2:NM_013995:exon9:c.C1222G:p.Q408E;LAMP2:NM_013995:exon9:c.C1222G:p.Q408E	exonic;exonic	ENSG00000005893	.	nonsynonymous SNV;nonsynonymous SNV	ENSG00000005893:ENST00000371335:exon9:c.C1222G:p.Q408E,ENSG00000005893:ENST00000540603:exon9:c.C1081G:p.Q361E;ENSG00000005893:ENST00000371335:exon9:c.C1222G:p.Q408E,ENSG00000005893:ENST00000540603:exon9:c.C1081G:p.Q361E	.	Uncertain significance	not_specified	RCV000222752.1	MedGen	CN169374
X	119573041	119573041	T	C	exonic;exonic	LAMP2	.	nonsynonymous SNV;nonsynonymous SNV	LAMP2:NM_013995:exon9:c.A1201G:p.R401G;LAMP2:NM_013995:exon9:c.A1201G:p.R401G	exonic;exonic	ENSG00000005893	.	nonsynonymous SNV;nonsynonymous SNV	ENSG00000005893:ENST00000371335:exon9:c.A1201G:p.R401G,ENSG00000005893:ENST00000540603:exon9:c.A1060G:p.R354G;ENSG00000005893:ENST00000371335:exon9:c.A1201G:p.R401G,ENSG00000005893:ENST00000540603:exon9:c.A1060G:p.R354G	rs777128122	Uncertain significance	Danon_disease	RCV000470496.1	MedGen:OMIM:Orphanet:SNOMED_CT	C0878677:300257:ORPHA34587:419097006
X	119573053	119573053	C	T	exonic;exonic	LAMP2	.	nonsynonymous SNV;nonsynonymous SNV	LAMP2:NM_013995:exon9:c.G1189A:p.V397I;LAMP2:NM_013995:exon9:c.G1189A:p.V397I	exonic;exonic	ENSG00000005893	.	nonsynonymous SNV;nonsynonymous SNV	ENSG00000005893:ENST00000371335:exon9:c.G1189A:p.V397I,ENSG00000005893:ENST00000540603:exon9:c.G1048A:p.V350I;ENSG00000005893:ENST00000371335:exon9:c.G1189A:p.V397I,ENSG00000005893:ENST00000540603:exon9:c.G1048A:p.V350I	rs730880488	Uncertain significance	Danon_disease	RCV000456636.1	MedGen:OMIM:Orphanet:SNOMED_CT	C0878677:300257:ORPHA34587:419097006
X	119573071	119573071	C	T	exonic;exonic	LAMP2	.	nonsynonymous SNV;nonsynonymous SNV	LAMP2:NM_013995:exon9:c.G1171A:p.V391I;LAMP2:NM_013995:exon9:c.G1171A:p.V391I	exonic;exonic	ENSG00000005893	.	nonsynonymous SNV;nonsynonymous SNV	ENSG00000005893:ENST00000371335:exon9:c.G1171A:p.V391I,ENSG00000005893:ENST00000540603:exon9:c.G1030A:p.V344I;ENSG00000005893:ENST00000371335:exon9:c.G1171A:p.V391I,ENSG00000005893:ENST00000540603:exon9:c.G1030A:p.V344I	rs144140265	other|Benign|Benign	not_specified|Danon_disease|not_provided	RCV000038789.4|RCV000230647.2|RCV000431687.1	MedGen|MedGen:OMIM:Orphanet:SNOMED_CT|MedGen	CN169374|C0878677:300257:ORPHA34587:419097006|CN221809
X	119573107	119573107	T	C	exonic;exonic	LAMP2	.	nonsynonymous SNV;nonsynonymous SNV	LAMP2:NM_013995:exon9:c.A1135G:p.I379V;LAMP2:NM_013995:exon9:c.A1135G:p.I379V	exonic;exonic	ENSG00000005893	.	nonsynonymous SNV;nonsynonymous SNV	ENSG00000005893:ENST00000371335:exon9:c.A1135G:p.I379V,ENSG00000005893:ENST00000540603:exon9:c.A994G:p.I332V;ENSG00000005893:ENST00000371335:exon9:c.A1135G:p.I379V,ENSG00000005893:ENST00000540603:exon9:c.A994G:p.I332V	rs140936359	Uncertain significance|Uncertain significance	not_specified|Danon_disease	RCV000157976.2|RCV000466553.1	MedGen|MedGen:OMIM:Orphanet:SNOMED_CT	CN169374|C0878677:300257:ORPHA34587:419097006
5	135390424	135390424	T	A	exonic	TGFBI	.	nonsynonymous SNV	TGFBI:NM_000358:exon10:c.T1284A:p.D428E	exonic	ENSG00000120708	.	nonsynonymous SNV	ENSG00000120708:ENST00000604555:exon5:c.T516A:p.D172E,ENSG00000120708:ENST00000305126:exon10:c.T1284A:p.D428E,ENSG00000120708:ENST00000442011:exon10:c.T1284A:p.D428E	.	Uncertain significance	Corneal_Dystrophy,_Dominant	RCV000407658.1	MedGen	CN239349
5	135390452	135390452	C	T	exonic	TGFBI	.	nonsynonymous SNV	TGFBI:NM_000358:exon10:c.C1312T:p.H438Y	exonic	ENSG00000120708	.	nonsynonymous SNV	ENSG00000120708:ENST00000604555:exon5:c.C544T:p.H182Y,ENSG00000120708:ENST00000305126:exon10:c.C1312T:p.H438Y,ENSG00000120708:ENST00000442011:exon10:c.C1312T:p.H438Y	rs148555720	Likely benign	Corneal_Dystrophy,_Dominant	RCV000306431.1	MedGen	CN239349
9	137721851	137721851	C	G	exonic;exonic;exonic	COL5A1	.	nonsynonymous SNV;nonsynonymous SNV;nonsynonymous SNV	COL5A1:NM_000093:exon64:c.C5097G:p.N1699K;COL5A1:NM_000093:exon64:c.C5097G:p.N1699K;COL5A1:NM_000093:exon64:c.C5097G:p.N1699K	exonic;exonic;exonic	ENSG00000130635	.	nonsynonymous SNV;nonsynonymous SNV;nonsynonymous SNV	ENSG00000130635:ENST00000371817:exon64:c.C5097G:p.N1699K;ENSG00000130635:ENST00000371817:exon64:c.C5097G:p.N1699K;ENSG00000130635:ENST00000371817:exon64:c.C5097G:p.N1699K	rs138396959	Uncertain significance|Uncertain significance	not_specified|Ehlers-Danlos_syndrome,_classic_type	RCV000198327.2|RCV000473287.1	MedGen|MedGen:OMIM:Orphanet:SNOMED_CT:SNOMED_CT	CN169374|C0268335:130000:ORPHA287:20766005:83470009
9	137721963	137721963	G	A	exonic;exonic;exonic	COL5A1	.	nonsynonymous SNV;nonsynonymous SNV;nonsynonymous SNV	COL5A1:NM_001278074:exon64:c.G5077A:p.A1693T;COL5A1:NM_001278074:exon64:c.G5077A:p.A1693T;COL5A1:NM_001278074:exon64:c.G5077A:p.A1693T	exonic;exonic;exonic	ENSG00000130635	.	unknown;unknown;unknown	UNKNOWN;UNKNOWN;UNKNOWN	rs560195385	Uncertain significance	not_specified	RCV000489504.1	MedGen	CN169374
8	144996458	144996458	G	A	exonic	PLEC	.	stopgain	PLEC:NM_201378:exon32:c.C7489T:p.Q2497X,PLEC:NM_201379:exon32:c.C7465T:p.Q2489X,PLEC:NM_201380:exon32:c.C7942T:p.Q2648X,PLEC:NM_201381:exon32:c.C7435T:p.Q2479X,PLEC:NM_201382:exon32:c.C7531T:p.Q2511X,PLEC:NM_201383:exon32:c.C7543T:p.Q2515X,PLEC:NM_201384:exon32:c.C7531T:p.Q2511X,PLEC:NM_000445:exon33:c.C7612T:p.Q2538X	exonic	ENSG00000178209	.	stopgain	ENSG00000178209:ENST00000322810:exon32:c.C7942T:p.Q2648X,ENSG00000178209:ENST00000345136:exon32:c.C7531T:p.Q2511X,ENSG00000178209:ENST00000354589:exon32:c.C7531T:p.Q2511X,ENSG00000178209:ENST00000354958:exon32:c.C7465T:p.Q2489X,ENSG00000178209:ENST00000356346:exon32:c.C7489T:p.Q2497X,ENSG00000178209:ENST00000357649:exon32:c.C7543T:p.Q2515X,ENSG00000178209:ENST00000398774:exon32:c.C7435T:p.Q2479X,…	.	Pathogenic	not_provided	RCV000414097.1	MedGen	CN221809
8	144996475	144996475	C	T	exonic	PLEC	.	nonsynonymous SNV	PLEC:NM_201378:exon32:c.G7472A:p.R2491Q,PLEC:NM_201379:exon32:c.G7448A:p.R2483Q,PLEC:NM_201380:exon32:c.G7925A:p.R2642Q,PLEC:NM_201381:exon32:c.G7418A:p.R2473Q,PLEC:NM_201382:exon32:c.G7514A:p.R2505Q,PLEC:NM_201383:exon32:c.G7526A:p.R2509Q,PLEC:NM_201384:exon32:c.G7514A:p.R2505Q,PLEC:NM_000445:exon33:c.G7595A:p.R2532Q	exonic	ENSG00000178209	.	nonsynonymous SNV	ENSG00000178209:ENST00000322810:exon32:c.G7925A:p.R2642Q,ENSG00000178209:ENST00000345136:exon32:c.G7514A:p.R2505Q,ENSG00000178209:ENST00000354589:exon32:c.G7514A:p.R2505Q,ENSG00000178209:ENST00000354958:exon32:c.G7448A:p.R2483Q,ENSG00000178209:ENST00000356346:exon32:c.G7472A:p.R2491Q,ENSG00000178209:ENST00000357649:exon32:c.G7526A:p.R2509Q,ENSG00000178209:ENST00000398774:exon32:c.G7418A:p.R2473Q,…	rs782664854	Uncertain significance	not_specified	RCV000321988.2	MedGen	CN169374
8	144996520	144996520	G	A	exonic	PLEC	.	nonsynonymous SNV	PLEC:NM_201378:exon32:c.C7427T:p.A2476V,PLEC:NM_201379:exon32:c.C7403T:p.A2468V,PLEC:NM_201380:exon32:c.C7880T:p.A2627V,PLEC:NM_201381:exon32:c.C7373T:p.A2458V,PLEC:NM_201382:exon32:c.C7469T:p.A2490V,PLEC:NM_201383:exon32:c.C7481T:p.A2494V,PLEC:NM_201384:exon32:c.C7469T:p.A2490V,PLEC:NM_000445:exon33:c.C7550T:p.A2517V	exonic	ENSG00000178209	.	nonsynonymous SNV	ENSG00000178209:ENST00000322810:exon32:c.C7880T:p.A2627V,ENSG00000178209:ENST00000345136:exon32:c.C7469T:p.A2490V,ENSG00000178209:ENST00000354589:exon32:c.C7469T:p.A2490V,ENSG00000178209:ENST00000354958:exon32:c.C7403T:p.A2468V,ENSG00000178209:ENST00000356346:exon32:c.C7427T:p.A2476V,ENSG00000178209:ENST00000357649:exon32:c.C7481T:p.A2494V,ENSG00000178209:ENST00000398774:exon32:c.C7373T:p.A2458V,…	.	Uncertain significance	not_specified	RCV000318776.1	MedGen	CN169374
8	144996548	144996548	G	C	exonic	PLEC	.	nonsynonymous SNV	PLEC:NM_201378:exon32:c.C7399G:p.Q2467E,PLEC:NM_201379:exon32:c.C7375G:p.Q2459E,PLEC:NM_201380:exon32:c.C7852G:p.Q2618E,PLEC:NM_201381:exon32:c.C7345G:p.Q2449E,PLEC:NM_201382:exon32:c.C7441G:p.Q2481E,PLEC:NM_201383:exon32:c.C7453G:p.Q2485E,PLEC:NM_201384:exon32:c.C7441G:p.Q2481E,PLEC:NM_000445:exon33:c.C7522G:p.Q2508E	exonic	ENSG00000178209	.	nonsynonymous SNV	ENSG00000178209:ENST00000322810:exon32:c.C7852G:p.Q2618E,ENSG00000178209:ENST00000345136:exon32:c.C7441G:p.Q2481E,ENSG00000178209:ENST00000354589:exon32:c.C7441G:p.Q2481E,ENSG00000178209:ENST00000354958:exon32:c.C7375G:p.Q2459E,ENSG00000178209:ENST00000356346:exon32:c.C7399G:p.Q2467E,ENSG00000178209:ENST00000357649:exon32:c.C7453G:p.Q2485E,ENSG00000178209:ENST00000398774:exon32:c.C7345G:p.Q2449E,…	rs782016209	Likely benign	not_specified	RCV000424375.1	MedGen	CN169374
8	144996714	144996714	C	A	exonic	PLEC	.	nonsynonymous SNV	PLEC:NM_201378:exon31:c.G7341T:p.K2447N,PLEC:NM_201379:exon31:c.G7317T:p.K2439N,PLEC:NM_201380:exon31:c.G7794T:p.K2598N,PLEC:NM_201381:exon31:c.G7287T:p.K2429N,PLEC:NM_201382:exon31:c.G7383T:p.K2461N,PLEC:NM_201383:exon31:c.G7395T:p.K2465N,PLEC:NM_201384:exon31:c.G7383T:p.K2461N,PLEC:NM_000445:exon32:c.G7464T:p.K2488N	exonic	ENSG00000178209	.	nonsynonymous SNV	ENSG00000178209:ENST00000322810:exon31:c.G7794T:p.K2598N,ENSG00000178209:ENST00000345136:exon31:c.G7383T:p.K2461N,ENSG00000178209:ENST00000354589:exon31:c.G7383T:p.K2461N,ENSG00000178209:ENST00000354958:exon31:c.G7317T:p.K2439N,ENSG00000178209:ENST00000356346:exon31:c.G7341T:p.K2447N,ENSG00000178209:ENST00000357649:exon31:c.G7395T:p.K2465N,ENSG00000178209:ENST00000398774:exon31:c.G7287T:p.K2429N,…	rs371673069	Uncertain significance	not_specified	RCV000177615.1	MedGen	CN169374
8	144996752	144996752	G	A	exonic	PLEC	.	nonsynonymous SNV	PLEC:NM_201378:exon31:c.C7303T:p.R2435W,PLEC:NM_201379:exon31:c.C7279T:p.R2427W,PLEC:NM_201380:exon31:c.C7756T:p.R2586W,PLEC:NM_201381:exon31:c.C7249T:p.R2417W,PLEC:NM_201382:exon31:c.C7345T:p.R2449W,PLEC:NM_201383:exon31:c.C7357T:p.R2453W,PLEC:NM_201384:exon31:c.C7345T:p.R2449W,PLEC:NM_000445:exon32:c.C7426T:p.R2476W	exonic	ENSG00000178209	.	nonsynonymous SNV	ENSG00000178209:ENST00000322810:exon31:c.C7756T:p.R2586W,ENSG00000178209:ENST00000345136:exon31:c.C7345T:p.R2449W,ENSG00000178209:ENST00000354589:exon31:c.C7345T:p.R2449W,ENSG00000178209:ENST00000354958:exon31:c.C7279T:p.R2427W,ENSG00000178209:ENST00000356346:exon31:c.C7303T:p.R2435W,ENSG00000178209:ENST00000357649:exon31:c.C7357T:p.R2453W,ENSG00000178209:ENST00000398774:exon31:c.C7249T:p.R2417W,…	rs571406033	Uncertain significance	not_specified	RCV000433280.1	MedGen	CN169374
8	144996830	144996830	C	T	exonic	PLEC	.	nonsynonymous SNV	PLEC:NM_201378:exon31:c.G7225A:p.A2409T,PLEC:NM_201379:exon31:c.G7201A:p.A2401T,PLEC:NM_201380:exon31:c.G7678A:p.A2560T,PLEC:NM_201381:exon31:c.G7171A:p.A2391T,PLEC:NM_201382:exon31:c.G7267A:p.A2423T,PLEC:NM_201383:exon31:c.G7279A:p.A2427T,PLEC:NM_201384:exon31:c.G7267A:p.A2423T,PLEC:NM_000445:exon32:c.G7348A:p.A2450T	exonic	ENSG00000178209	.	nonsynonymous SNV	ENSG00000178209:ENST00000322810:exon31:c.G7678A:p.A2560T,ENSG00000178209:ENST00000345136:exon31:c.G7267A:p.A2423T,ENSG00000178209:ENST00000354589:exon31:c.G7267A:p.A2423T,ENSG00000178209:ENST00000354958:exon31:c.G7201A:p.A2401T,ENSG00000178209:ENST00000356346:exon31:c.G7225A:p.A2409T,ENSG00000178209:ENST00000357649:exon31:c.G7279A:p.A2427T,ENSG00000178209:ENST00000398774:exon31:c.G7171A:p.A2391T,…	rs193257576	other	not_specified	RCV000177598.6	MedGen	CN169374
8	144996877	144996877	C	T	exonic	PLEC	.	nonsynonymous SNV	PLEC:NM_201378:exon31:c.G7178A:p.R2393Q,PLEC:NM_201379:exon31:c.G7154A:p.R2385Q,PLEC:NM_201380:exon31:c.G7631A:p.R2544Q,PLEC:NM_201381:exon31:c.G7124A:p.R2375Q,PLEC:NM_201382:exon31:c.G7220A:p.R2407Q,PLEC:NM_201383:exon31:c.G7232A:p.R2411Q,PLEC:NM_201384:exon31:c.G7220A:p.R2407Q,PLEC:NM_000445:exon32:c.G7301A:p.R2434Q	exonic	ENSG00000178209	.	nonsynonymous SNV	ENSG00000178209:ENST00000322810:exon31:c.G7631A:p.R2544Q,ENSG00000178209:ENST00000345136:exon31:c.G7220A:p.R2407Q,ENSG00000178209:ENST00000354589:exon31:c.G7220A:p.R2407Q,ENSG00000178209:ENST00000354958:exon31:c.G7154A:p.R2385Q,ENSG00000178209:ENST00000356346:exon31:c.G7178A:p.R2393Q,ENSG00000178209:ENST00000357649:exon31:c.G7232A:p.R2411Q,ENSG00000178209:ENST00000398774:exon31:c.G7124A:p.R2375Q,…	rs782618396	Uncertain significance	not_specified	RCV000290597.1	MedGen	CN169374
8	144996905	144996905	G	A	exonic	PLEC	.	nonsynonymous SNV	PLEC:NM_201378:exon31:c.C7150T:p.R2384C,PLEC:NM_201379:exon31:c.C7126T:p.R2376C,PLEC:NM_201380:exon31:c.C7603T:p.R2535C,PLEC:NM_201381:exon31:c.C7096T:p.R2366C,PLEC:NM_201382:exon31:c.C7192T:p.R2398C,PLEC:NM_201383:exon31:c.C7204T:p.R2402C,PLEC:NM_201384:exon31:c.C7192T:p.R2398C,PLEC:NM_000445:exon32:c.C7273T:p.R2425C	exonic	ENSG00000178209	.	nonsynonymous SNV	ENSG00000178209:ENST00000322810:exon31:c.C7603T:p.R2535C,ENSG00000178209:ENST00000345136:exon31:c.C7192T:p.R2398C,ENSG00000178209:ENST00000354589:exon31:c.C7192T:p.R2398C,ENSG00000178209:ENST00000354958:exon31:c.C7126T:p.R2376C,ENSG00000178209:ENST00000356346:exon31:c.C7150T:p.R2384C,ENSG00000178209:ENST00000357649:exon31:c.C7204T:p.R2402C,ENSG00000178209:ENST00000398774:exon31:c.C7096T:p.R2366C,…	rs200880699	Uncertain significance	not_specified	RCV000365737.1	MedGen	CN169374
8	144996917	144996917	G	A	exonic	PLEC	.	stopgain	PLEC:NM_201378:exon31:c.C7138T:p.R2380X,PLEC:NM_201379:exon31:c.C7114T:p.R2372X,PLEC:NM_201380:exon31:c.C7591T:p.R2531X,PLEC:NM_201381:exon31:c.C7084T:p.R2362X,PLEC:NM_201382:exon31:c.C7180T:p.R2394X,PLEC:NM_201383:exon31:c.C7192T:p.R2398X,PLEC:NM_201384:exon31:c.C7180T:p.R2394X,PLEC:NM_000445:exon32:c.C7261T:p.R2421X	exonic	ENSG00000178209	.	stopgain	ENSG00000178209:ENST00000322810:exon31:c.C7591T:p.R2531X,ENSG00000178209:ENST00000345136:exon31:c.C7180T:p.R2394X,ENSG00000178209:ENST00000354589:exon31:c.C7180T:p.R2394X,ENSG00000178209:ENST00000354958:exon31:c.C7114T:p.R2372X,ENSG00000178209:ENST00000356346:exon31:c.C7138T:p.R2380X,ENSG00000178209:ENST00000357649:exon31:c.C7192T:p.R2398X,ENSG00000178209:ENST00000398774:exon31:c.C7084T:p.R2362X,…	.	Pathogenic	Epidermolysa_bullosa_simplex_and_limb_girdle_muscular_dystrophy	RCV000351745.1	MedGen:OMIM:Orphanet	C2931072:226670:ORPHA257
8	144996926	144996926	C	T	exonic	PLEC	.	nonsynonymous SNV	PLEC:NM_201378:exon31:c.G7129A:p.E2377K,PLEC:NM_201379:exon31:c.G7105A:p.E2369K,PLEC:NM_201380:exon31:c.G7582A:p.E2528K,PLEC:NM_201381:exon31:c.G7075A:p.E2359K,PLEC:NM_201382:exon31:c.G7171A:p.E2391K,PLEC:NM_201383:exon31:c.G7183A:p.E2395K,PLEC:NM_201384:exon31:c.G7171A:p.E2391K,PLEC:NM_000445:exon32:c.G7252A:p.E2418K	exonic	ENSG00000178209	.	nonsynonymous SNV	ENSG00000178209:ENST00000322810:exon31:c.G7582A:p.E2528K,ENSG00000178209:ENST00000345136:exon31:c.G7171A:p.E2391K,ENSG00000178209:ENST00000354589:exon31:c.G7171A:p.E2391K,ENSG00000178209:ENST00000354958:exon31:c.G7105A:p.E2369K,ENSG00000178209:ENST00000356346:exon31:c.G7129A:p.E2377K,ENSG00000178209:ENST00000357649:exon31:c.G7183A:p.E2395K,ENSG00000178209:ENST00000398774:exon31:c.G7075A:p.E2359K,…	rs368939666	Uncertain significance	not_specified	RCV000276803.2	MedGen	CN169374
8	144996976	144996976	C	T	exonic	PLEC	.	nonsynonymous SNV	PLEC:NM_201378:exon31:c.G7079A:p.R2360Q,PLEC:NM_201379:exon31:c.G7055A:p.R2352Q,PLEC:NM_201380:exon31:c.G7532A:p.R2511Q,PLEC:NM_201381:exon31:c.G7025A:p.R2342Q,PLEC:NM_201382:exon31:c.G7121A:p.R2374Q,PLEC:NM_201383:exon31:c.G7133A:p.R2378Q,PLEC:NM_201384:exon31:c.G7121A:p.R2374Q,PLEC:NM_000445:exon32:c.G7202A:p.R2401Q	exonic	ENSG00000178209	.	nonsynonymous SNV	ENSG00000178209:ENST00000322810:exon31:c.G7532A:p.R2511Q,ENSG00000178209:ENST00000345136:exon31:c.G7121A:p.R2374Q,ENSG00000178209:ENST00000354589:exon31:c.G7121A:p.R2374Q,ENSG00000178209:ENST00000354958:exon31:c.G7055A:p.R2352Q,ENSG00000178209:ENST00000356346:exon31:c.G7079A:p.R2360Q,ENSG00000178209:ENST00000357649:exon31:c.G7133A:p.R2378Q,ENSG00000178209:ENST00000398774:exon31:c.G7025A:p.R2342Q,…	rs201417343	Uncertain significance	not_specified	RCV000271394.2	MedGen	CN169374
8	144997015	144997015	G	A	exonic	PLEC	.	nonsynonymous SNV	PLEC:NM_201378:exon31:c.C7040T:p.T2347M,PLEC:NM_201379:exon31:c.C7016T:p.T2339M,PLEC:NM_201380:exon31:c.C7493T:p.T2498M,PLEC:NM_201381:exon31:c.C6986T:p.T2329M,PLEC:NM_201382:exon31:c.C7082T:p.T2361M,PLEC:NM_201383:exon31:c.C7094T:p.T2365M,PLEC:NM_201384:exon31:c.C7082T:p.T2361M,PLEC:NM_000445:exon32:c.C7163T:p.T2388M	exonic	ENSG00000178209	.	nonsynonymous SNV	ENSG00000178209:ENST00000322810:exon31:c.C7493T:p.T2498M,ENSG00000178209:ENST00000345136:exon31:c.C7082T:p.T2361M,ENSG00000178209:ENST00000354589:exon31:c.C7082T:p.T2361M,ENSG00000178209:ENST00000354958:exon31:c.C7016T:p.T2339M,ENSG00000178209:ENST00000356346:exon31:c.C7040T:p.T2347M,ENSG00000178209:ENST00000357649:exon31:c.C7094T:p.T2365M,ENSG00000178209:ENST00000398774:exon31:c.C6986T:p.T2329M,…	rs369522291	Uncertain significance	not_specified	RCV000340103.2	MedGen	CN169374
8	144997063	144997063	C	T	exonic	PLEC	.	nonsynonymous SNV	PLEC:NM_201378:exon31:c.G6992A:p.R2331Q,PLEC:NM_201379:exon31:c.G6968A:p.R2323Q,PLEC:NM_201380:exon31:c.G7445A:p.R2482Q,PLEC:NM_201381:exon31:c.G6938A:p.R2313Q,PLEC:NM_201382:exon31:c.G7034A:p.R2345Q,PLEC:NM_201383:exon31:c.G7046A:p.R2349Q,PLEC:NM_201384:exon31:c.G7034A:p.R2345Q,PLEC:NM_000445:exon32:c.G7115A:p.R2372Q	exonic	ENSG00000178209	.	nonsynonymous SNV	ENSG00000178209:ENST00000322810:exon31:c.G7445A:p.R2482Q,ENSG00000178209:ENST00000345136:exon31:c.G7034A:p.R2345Q,ENSG00000178209:ENST00000354589:exon31:c.G7034A:p.R2345Q,ENSG00000178209:ENST00000354958:exon31:c.G6968A:p.R2323Q,ENSG00000178209:ENST00000356346:exon31:c.G6992A:p.R2331Q,ENSG00000178209:ENST00000357649:exon31:c.G7046A:p.R2349Q,ENSG00000178209:ENST00000398774:exon31:c.G6938A:p.R2313Q,…	rs541098488	Uncertain significance	not_specified	RCV000501609.1	MedGen	CN169374
8	144997223	144997223	G	A	exonic	PLEC	.	stopgain	PLEC:NM_201378:exon31:c.C6832T:p.R2278X,PLEC:NM_201379:exon31:c.C6808T:p.R2270X,PLEC:NM_201380:exon31:c.C7285T:p.R2429X,PLEC:NM_201381:exon31:c.C6778T:p.R2260X,PLEC:NM_201382:exon31:c.C6874T:p.R2292X,PLEC:NM_201383:exon31:c.C6886T:p.R2296X,PLEC:NM_201384:exon31:c.C6874T:p.R2292X,PLEC:NM_000445:exon32:c.C6955T:p.R2319X	exonic	ENSG00000178209	.	stopgain	ENSG00000178209:ENST00000322810:exon31:c.C7285T:p.R2429X,ENSG00000178209:ENST00000345136:exon31:c.C6874T:p.R2292X,ENSG00000178209:ENST00000354589:exon31:c.C6874T:p.R2292X,ENSG00000178209:ENST00000354958:exon31:c.C6808T:p.R2270X,ENSG00000178209:ENST00000356346:exon31:c.C6832T:p.R2278X,ENSG00000178209:ENST00000357649:exon31:c.C6886T:p.R2296X,ENSG00000178209:ENST00000398774:exon31:c.C6778T:p.R2260X,…	rs387906802	Pathogenic	Epidermolysa_bullosa_simplex_and_limb_girdle_muscular_dystrophy	RCV000023092.7	MedGen:OMIM:Orphanet	C2931072:226670:ORPHA257
8	144997255	144997255	G	A	exonic	PLEC	.	nonsynonymous SNV	PLEC:NM_201378:exon31:c.C6800T:p.A2267V,PLEC:NM_201379:exon31:c.C6776T:p.A2259V,PLEC:NM_201380:exon31:c.C7253T:p.A2418V,PLEC:NM_201381:exon31:c.C6746T:p.A2249V,PLEC:NM_201382:exon31:c.C6842T:p.A2281V,PLEC:NM_201383:exon31:c.C6854T:p.A2285V,PLEC:NM_201384:exon31:c.C6842T:p.A2281V,PLEC:NM_000445:exon32:c.C6923T:p.A2308V	exonic	ENSG00000178209	.	nonsynonymous SNV	ENSG00000178209:ENST00000322810:exon31:c.C7253T:p.A2418V,ENSG00000178209:ENST00000345136:exon31:c.C6842T:p.A2281V,ENSG00000178209:ENST00000354589:exon31:c.C6842T:p.A2281V,ENSG00000178209:ENST00000354958:exon31:c.C6776T:p.A2259V,ENSG00000178209:ENST00000356346:exon31:c.C6800T:p.A2267V,ENSG00000178209:ENST00000357649:exon31:c.C6854T:p.A2285V,ENSG00000178209:ENST00000398774:exon31:c.C6746T:p.A2249V,…	rs371130595	Uncertain significance	not_specified	RCV000336540.2	MedGen	CN169374
8	144997307	144997307	G	A	exonic	PLEC	.	nonsynonymous SNV	PLEC:NM_201378:exon31:c.C6748T:p.R2250C,PLEC:NM_201379:exon31:c.C6724T:p.R2242C,PLEC:NM_201380:exon31:c.C7201T:p.R2401C,PLEC:NM_201381:exon31:c.C6694T:p.R2232C,PLEC:NM_201382:exon31:c.C6790T:p.R2264C,PLEC:NM_201383:exon31:c.C6802T:p.R2268C,PLEC:NM_201384:exon31:c.C6790T:p.R2264C,PLEC:NM_000445:exon32:c.C6871T:p.R2291C	exonic	ENSG00000178209	.	nonsynonymous SNV	ENSG00000178209:ENST00000322810:exon31:c.C7201T:p.R2401C,ENSG00000178209:ENST00000345136:exon31:c.C6790T:p.R2264C,ENSG00000178209:ENST00000354589:exon31:c.C6790T:p.R2264C,ENSG00000178209:ENST00000354958:exon31:c.C6724T:p.R2242C,ENSG00000178209:ENST00000356346:exon31:c.C6748T:p.R2250C,ENSG00000178209:ENST00000357649:exon31:c.C6802T:p.R2268C,ENSG00000178209:ENST00000398774:exon31:c.C6694T:p.R2232C,…	rs371749261	Uncertain significance	not_specified	RCV000218416.1	MedGen	CN169374
8	144997319	144997319	C	T	exonic	PLEC	.	nonsynonymous SNV	PLEC:NM_201378:exon31:c.G6736A:p.D2246N,PLEC:NM_201379:exon31:c.G6712A:p.D2238N,PLEC:NM_201380:exon31:c.G7189A:p.D2397N,PLEC:NM_201381:exon31:c.G6682A:p.D2228N,PLEC:NM_201382:exon31:c.G6778A:p.D2260N,PLEC:NM_201383:exon31:c.G6790A:p.D2264N,PLEC:NM_201384:exon31:c.G6778A:p.D2260N,PLEC:NM_000445:exon32:c.G6859A:p.D2287N	exonic	ENSG00000178209	.	nonsynonymous SNV	ENSG00000178209:ENST00000322810:exon31:c.G7189A:p.D2397N,ENSG00000178209:ENST00000345136:exon31:c.G6778A:p.D2260N,ENSG00000178209:ENST00000354589:exon31:c.G6778A:p.D2260N,ENSG00000178209:ENST00000354958:exon31:c.G6712A:p.D2238N,ENSG00000178209:ENST00000356346:exon31:c.G6736A:p.D2246N,ENSG00000178209:ENST00000357649:exon31:c.G6790A:p.D2264N,ENSG00000178209:ENST00000398774:exon31:c.G6682A:p.D2228N,…	rs371763907	Uncertain significance	not_specified	RCV000328457.2	MedGen	CN169374
8	144997339	144997339	G	A	exonic	PLEC	.	nonsynonymous SNV	PLEC:NM_201378:exon31:c.C6716T:p.A2239V,PLEC:NM_201379:exon31:c.C6692T:p.A2231V,PLEC:NM_201380:exon31:c.C7169T:p.A2390V,PLEC:NM_201381:exon31:c.C6662T:p.A2221V,PLEC:NM_201382:exon31:c.C6758T:p.A2253V,PLEC:NM_201383:exon31:c.C6770T:p.A2257V,PLEC:NM_201384:exon31:c.C6758T:p.A2253V,PLEC:NM_000445:exon32:c.C6839T:p.A2280V	exonic	ENSG00000178209	.	nonsynonymous SNV	ENSG00000178209:ENST00000322810:exon31:c.C7169T:p.A2390V,ENSG00000178209:ENST00000345136:exon31:c.C6758T:p.A2253V,ENSG00000178209:ENST00000354589:exon31:c.C6758T:p.A2253V,ENSG00000178209:ENST00000354958:exon31:c.C6692T:p.A2231V,ENSG00000178209:ENST00000356346:exon31:c.C6716T:p.A2239V,ENSG00000178209:ENST00000357649:exon31:c.C6770T:p.A2257V,ENSG00000178209:ENST00000398774:exon31:c.C6662T:p.A2221V,…	rs782329522	Uncertain significance	not_specified	RCV000177604.1	MedGen	CN169374
8	144997340	144997340	C	T	exonic	PLEC	.	nonsynonymous SNV	PLEC:NM_201378:exon31:c.G6715A:p.A2239T,PLEC:NM_201379:exon31:c.G6691A:p.A2231T,PLEC:NM_201380:exon31:c.G7168A:p.A2390T,PLEC:NM_201381:exon31:c.G6661A:p.A2221T,PLEC:NM_201382:exon31:c.G6757A:p.A2253T,PLEC:NM_201383:exon31:c.G6769A:p.A2257T,PLEC:NM_201384:exon31:c.G6757A:p.A2253T,PLEC:NM_000445:exon32:c.G6838A:p.A2280T	exonic	ENSG00000178209	.	nonsynonymous SNV	ENSG00000178209:ENST00000322810:exon31:c.G7168A:p.A2390T,ENSG00000178209:ENST00000345136:exon31:c.G6757A:p.A2253T,ENSG00000178209:ENST00000354589:exon31:c.G6757A:p.A2253T,ENSG00000178209:ENST00000354958:exon31:c.G6691A:p.A2231T,ENSG00000178209:ENST00000356346:exon31:c.G6715A:p.A2239T,ENSG00000178209:ENST00000357649:exon31:c.G6769A:p.A2257T,ENSG00000178209:ENST00000398774:exon31:c.G6661A:p.A2221T,…	rs62641756	other	not_specified	RCV000078891.7	MedGen	CN169374
8	144997429	144997429	C	T	exonic	PLEC	.	nonsynonymous SNV	PLEC:NM_201378:exon31:c.G6626A:p.R2209H,PLEC:NM_201379:exon31:c.G6602A:p.R2201H,PLEC:NM_201380:exon31:c.G7079A:p.R2360H,PLEC:NM_201381:exon31:c.G6572A:p.R2191H,PLEC:NM_201382:exon31:c.G6668A:p.R2223H,PLEC:NM_201383:exon31:c.G6680A:p.R2227H,PLEC:NM_201384:exon31:c.G6668A:p.R2223H,PLEC:NM_000445:exon32:c.G6749A:p.R2250H	exonic	ENSG00000178209	.	nonsynonymous SNV	ENSG00000178209:ENST00000322810:exon31:c.G7079A:p.R2360H,ENSG00000178209:ENST00000345136:exon31:c.G6668A:p.R2223H,ENSG00000178209:ENST00000354589:exon31:c.G6668A:p.R2223H,ENSG00000178209:ENST00000354958:exon31:c.G6602A:p.R2201H,ENSG00000178209:ENST00000356346:exon31:c.G6626A:p.R2209H,ENSG00000178209:ENST00000357649:exon31:c.G6680A:p.R2227H,ENSG00000178209:ENST00000398774:exon31:c.G6572A:p.R2191H,…	rs565225660	Uncertain significance	not_specified	RCV000287237.1	MedGen	CN169374
8	144997492	144997492	T	C	exonic	PLEC	.	nonsynonymous SNV	PLEC:NM_201378:exon31:c.A6563G:p.K2188R,PLEC:NM_201379:exon31:c.A6539G:p.K2180R,PLEC:NM_201380:exon31:c.A7016G:p.K2339R,PLEC:NM_201381:exon31:c.A6509G:p.K2170R,PLEC:NM_201382:exon31:c.A6605G:p.K2202R,PLEC:NM_201383:exon31:c.A6617G:p.K2206R,PLEC:NM_201384:exon31:c.A6605G:p.K2202R,PLEC:NM_000445:exon32:c.A6686G:p.K2229R	exonic	ENSG00000178209	.	nonsynonymous SNV	ENSG00000178209:ENST00000322810:exon31:c.A7016G:p.K2339R,ENSG00000178209:ENST00000345136:exon31:c.A6605G:p.K2202R,ENSG00000178209:ENST00000354589:exon31:c.A6605G:p.K2202R,ENSG00000178209:ENST00000354958:exon31:c.A6539G:p.K2180R,ENSG00000178209:ENST00000356346:exon31:c.A6563G:p.K2188R,ENSG00000178209:ENST00000357649:exon31:c.A6617G:p.K2206R,ENSG00000178209:ENST00000398774:exon31:c.A6509G:p.K2170R,…	rs201928401	Uncertain significance	not_specified	RCV000298780.2	MedGen	CN169374
8	144997522	144997522	C	T	exonic	PLEC	.	nonsynonymous SNV	PLEC:NM_201378:exon31:c.G6533A:p.R2178Q,PLEC:NM_201379:exon31:c.G6509A:p.R2170Q,PLEC:NM_201380:exon31:c.G6986A:p.R2329Q,PLEC:NM_201381:exon31:c.G6479A:p.R2160Q,PLEC:NM_201382:exon31:c.G6575A:p.R2192Q,PLEC:NM_201383:exon31:c.G6587A:p.R2196Q,PLEC:NM_201384:exon31:c.G6575A:p.R2192Q,PLEC:NM_000445:exon32:c.G6656A:p.R2219Q	exonic	ENSG00000178209	.	nonsynonymous SNV	ENSG00000178209:ENST00000322810:exon31:c.G6986A:p.R2329Q,ENSG00000178209:ENST00000345136:exon31:c.G6575A:p.R2192Q,ENSG00000178209:ENST00000354589:exon31:c.G6575A:p.R2192Q,ENSG00000178209:ENST00000354958:exon31:c.G6509A:p.R2170Q,ENSG00000178209:ENST00000356346:exon31:c.G6533A:p.R2178Q,ENSG00000178209:ENST00000357649:exon31:c.G6587A:p.R2196Q,ENSG00000178209:ENST00000398774:exon31:c.G6479A:p.R2160Q,…	rs782640089	Uncertain significance	not_specified	RCV000293448.1	MedGen	CN169374
8	144997561	144997561	C	T	exonic	PLEC	.	nonsynonymous SNV	PLEC:NM_201378:exon31:c.G6494A:p.R2165Q,PLEC:NM_201379:exon31:c.G6470A:p.R2157Q,PLEC:NM_201380:exon31:c.G6947A:p.R2316Q,PLEC:NM_201381:exon31:c.G6440A:p.R2147Q,PLEC:NM_201382:exon31:c.G6536A:p.R2179Q,PLEC:NM_201383:exon31:c.G6548A:p.R2183Q,PLEC:NM_201384:exon31:c.G6536A:p.R2179Q,PLEC:NM_000445:exon32:c.G6617A:p.R2206Q	exonic	ENSG00000178209	.	nonsynonymous SNV	ENSG00000178209:ENST00000322810:exon31:c.G6947A:p.R2316Q,ENSG00000178209:ENST00000345136:exon31:c.G6536A:p.R2179Q,ENSG00000178209:ENST00000354589:exon31:c.G6536A:p.R2179Q,ENSG00000178209:ENST00000354958:exon31:c.G6470A:p.R2157Q,ENSG00000178209:ENST00000356346:exon31:c.G6494A:p.R2165Q,ENSG00000178209:ENST00000357649:exon31:c.G6548A:p.R2183Q,ENSG00000178209:ENST00000398774:exon31:c.G6440A:p.R2147Q,…	rs117962829	Uncertain significance	not_specified	RCV000177616.3	MedGen	CN169374
8	144997577	144997577	C	T	exonic	PLEC	.	nonsynonymous SNV	PLEC:NM_201378:exon31:c.G6478A:p.A2160T,PLEC:NM_201379:exon31:c.G6454A:p.A2152T,PLEC:NM_201380:exon31:c.G6931A:p.A2311T,PLEC:NM_201381:exon31:c.G6424A:p.A2142T,PLEC:NM_201382:exon31:c.G6520A:p.A2174T,PLEC:NM_201383:exon31:c.G6532A:p.A2178T,PLEC:NM_201384:exon31:c.G6520A:p.A2174T,PLEC:NM_000445:exon32:c.G6601A:p.A2201T	exonic	ENSG00000178209	.	nonsynonymous SNV	ENSG00000178209:ENST00000322810:exon31:c.G6931A:p.A2311T,ENSG00000178209:ENST00000345136:exon31:c.G6520A:p.A2174T,ENSG00000178209:ENST00000354589:exon31:c.G6520A:p.A2174T,ENSG00000178209:ENST00000354958:exon31:c.G6454A:p.A2152T,ENSG00000178209:ENST00000356346:exon31:c.G6478A:p.A2160T,ENSG00000178209:ENST00000357649:exon31:c.G6532A:p.A2178T,ENSG00000178209:ENST00000398774:exon31:c.G6424A:p.A2142T,…	rs782018578	Uncertain significance	not_specified	RCV000348565.2	MedGen	CN169374
8	144997609	144997609	G	C	exonic	PLEC	.	nonsynonymous SNV	PLEC:NM_201378:exon31:c.C6446G:p.A2149G,PLEC:NM_201379:exon31:c.C6422G:p.A2141G,PLEC:NM_201380:exon31:c.C6899G:p.A2300G,PLEC:NM_201381:exon31:c.C6392G:p.A2131G,PLEC:NM_201382:exon31:c.C6488G:p.A2163G,PLEC:NM_201383:exon31:c.C6500G:p.A2167G,PLEC:NM_201384:exon31:c.C6488G:p.A2163G,PLEC:NM_000445:exon32:c.C6569G:p.A2190G	exonic	ENSG00000178209	.	nonsynonymous SNV	ENSG00000178209:ENST00000322810:exon31:c.C6899G:p.A2300G,ENSG00000178209:ENST00000345136:exon31:c.C6488G:p.A2163G,ENSG00000178209:ENST00000354589:exon31:c.C6488G:p.A2163G,ENSG00000178209:ENST00000354958:exon31:c.C6422G:p.A2141G,ENSG00000178209:ENST00000356346:exon31:c.C6446G:p.A2149G,ENSG00000178209:ENST00000357649:exon31:c.C6500G:p.A2167G,ENSG00000178209:ENST00000398774:exon31:c.C6392G:p.A2131G,…	rs201845757	Uncertain significance	not_specified	RCV000323288.1	MedGen	CN169374
8	144997633	144997633	G	A	exonic	PLEC	.	nonsynonymous SNV	PLEC:NM_201378:exon31:c.C6422T:p.A2141V,PLEC:NM_201379:exon31:c.C6398T:p.A2133V,PLEC:NM_201380:exon31:c.C6875T:p.A2292V,PLEC:NM_201381:exon31:c.C6368T:p.A2123V,PLEC:NM_201382:exon31:c.C6464T:p.A2155V,PLEC:NM_201383:exon31:c.C6476T:p.A2159V,PLEC:NM_201384:exon31:c.C6464T:p.A2155V,PLEC:NM_000445:exon32:c.C6545T:p.A2182V	exonic	ENSG00000178209	.	nonsynonymous SNV	ENSG00000178209:ENST00000322810:exon31:c.C6875T:p.A2292V,ENSG00000178209:ENST00000345136:exon31:c.C6464T:p.A2155V,ENSG00000178209:ENST00000354589:exon31:c.C6464T:p.A2155V,ENSG00000178209:ENST00000354958:exon31:c.C6398T:p.A2133V,ENSG00000178209:ENST00000356346:exon31:c.C6422T:p.A2141V,ENSG00000178209:ENST00000357649:exon31:c.C6476T:p.A2159V,ENSG00000178209:ENST00000398774:exon31:c.C6368T:p.A2123V,…	rs201922111	Uncertain significance	not_specified	RCV000497742.1	MedGen	CN169374
8	144997673	144997673	C	T	exonic	PLEC	.	nonsynonymous SNV	PLEC:NM_201378:exon31:c.G6382A:p.A2128T,PLEC:NM_201379:exon31:c.G6358A:p.A2120T,PLEC:NM_201380:exon31:c.G6835A:p.A2279T,PLEC:NM_201381:exon31:c.G6328A:p.A2110T,PLEC:NM_201382:exon31:c.G6424A:p.A2142T,PLEC:NM_201383:exon31:c.G6436A:p.A2146T,PLEC:NM_201384:exon31:c.G6424A:p.A2142T,PLEC:NM_000445:exon32:c.G6505A:p.A2169T	exonic	ENSG00000178209	.	nonsynonymous SNV	ENSG00000178209:ENST00000322810:exon31:c.G6835A:p.A2279T,ENSG00000178209:ENST00000345136:exon31:c.G6424A:p.A2142T,ENSG00000178209:ENST00000354589:exon31:c.G6424A:p.A2142T,ENSG00000178209:ENST00000354958:exon31:c.G6358A:p.A2120T,ENSG00000178209:ENST00000356346:exon31:c.G6382A:p.A2128T,ENSG00000178209:ENST00000357649:exon31:c.G6436A:p.A2146T,ENSG00000178209:ENST00000398774:exon31:c.G6328A:p.A2110T,…	rs370942881	Likely benign	not_specified	RCV000428838.1	MedGen	CN169374
8	144997783	144997783	G	A	exonic	PLEC	.	nonsynonymous SNV	PLEC:NM_201378:exon31:c.C6272T:p.A2091V,PLEC:NM_201379:exon31:c.C6248T:p.A2083V,PLEC:NM_201380:exon31:c.C6725T:p.A2242V,PLEC:NM_201381:exon31:c.C6218T:p.A2073V,PLEC:NM_201382:exon31:c.C6314T:p.A2105V,PLEC:NM_201383:exon31:c.C6326T:p.A2109V,PLEC:NM_201384:exon31:c.C6314T:p.A2105V,PLEC:NM_000445:exon32:c.C6395T:p.A2132V	exonic	ENSG00000178209	.	nonsynonymous SNV	ENSG00000178209:ENST00000322810:exon31:c.C6725T:p.A2242V,ENSG00000178209:ENST00000345136:exon31:c.C6314T:p.A2105V,ENSG00000178209:ENST00000354589:exon31:c.C6314T:p.A2105V,ENSG00000178209:ENST00000354958:exon31:c.C6248T:p.A2083V,ENSG00000178209:ENST00000356346:exon31:c.C6272T:p.A2091V,ENSG00000178209:ENST00000357649:exon31:c.C6326T:p.A2109V,ENSG00000178209:ENST00000398774:exon31:c.C6218T:p.A2073V,…	rs74772299	other	not_specified	RCV000078887.11	MedGen	CN169374
8	144997784	144997784	C	T	exonic	PLEC	.	nonsynonymous SNV	PLEC:NM_201378:exon31:c.G6271A:p.A2091T,PLEC:NM_201379:exon31:c.G6247A:p.A2083T,PLEC:NM_201380:exon31:c.G6724A:p.A2242T,PLEC:NM_201381:exon31:c.G6217A:p.A2073T,PLEC:NM_201382:exon31:c.G6313A:p.A2105T,PLEC:NM_201383:exon31:c.G6325A:p.A2109T,PLEC:NM_201384:exon31:c.G6313A:p.A2105T,PLEC:NM_000445:exon32:c.G6394A:p.A2132T	exonic	ENSG00000178209	.	nonsynonymous SNV	ENSG00000178209:ENST00000322810:exon31:c.G6724A:p.A2242T,ENSG00000178209:ENST00000345136:exon31:c.G6313A:p.A2105T,ENSG00000178209:ENST00000354589:exon31:c.G6313A:p.A2105T,ENSG00000178209:ENST00000354958:exon31:c.G6247A:p.A2083T,ENSG00000178209:ENST00000356346:exon31:c.G6271A:p.A2091T,ENSG00000178209:ENST00000357649:exon31:c.G6325A:p.A2109T,ENSG00000178209:ENST00000398774:exon31:c.G6217A:p.A2073T,…	rs781931836	Uncertain significance	not_specified	RCV000193631.2	MedGen	CN169374
8	144997786	144997786	G	A	exonic	PLEC	.	nonsynonymous SNV	PLEC:NM_201378:exon31:c.C6269T:p.A2090V,PLEC:NM_201379:exon31:c.C6245T:p.A2082V,PLEC:NM_201380:exon31:c.C6722T:p.A2241V,PLEC:NM_201381:exon31:c.C6215T:p.A2072V,PLEC:NM_201382:exon31:c.C6311T:p.A2104V,PLEC:NM_201383:exon31:c.C6323T:p.A2108V,PLEC:NM_201384:exon31:c.C6311T:p.A2104V,PLEC:NM_000445:exon32:c.C6392T:p.A2131V	exonic	ENSG00000178209	.	nonsynonymous SNV	ENSG00000178209:ENST00000322810:exon31:c.C6722T:p.A2241V,ENSG00000178209:ENST00000345136:exon31:c.C6311T:p.A2104V,ENSG00000178209:ENST00000354589:exon31:c.C6311T:p.A2104V,ENSG00000178209:ENST00000354958:exon31:c.C6245T:p.A2082V,ENSG00000178209:ENST00000356346:exon31:c.C6269T:p.A2090V,ENSG00000178209:ENST00000357649:exon31:c.C6323T:p.A2108V,ENSG00000178209:ENST00000398774:exon31:c.C6215T:p.A2072V,…	rs201959200	Benign	not_specified	RCV000177605.4	MedGen	CN169374
8	144997819	144997819	G	A	exonic	PLEC	.	nonsynonymous SNV	PLEC:NM_201378:exon31:c.C6236T:p.A2079V,PLEC:NM_201379:exon31:c.C6212T:p.A2071V,PLEC:NM_201380:exon31:c.C6689T:p.A2230V,PLEC:NM_201381:exon31:c.C6182T:p.A2061V,PLEC:NM_201382:exon31:c.C6278T:p.A2093V,PLEC:NM_201383:exon31:c.C6290T:p.A2097V,PLEC:NM_201384:exon31:c.C6278T:p.A2093V,PLEC:NM_000445:exon32:c.C6359T:p.A2120V	exonic	ENSG00000178209	.	nonsynonymous SNV	ENSG00000178209:ENST00000322810:exon31:c.C6689T:p.A2230V,ENSG00000178209:ENST00000345136:exon31:c.C6278T:p.A2093V,ENSG00000178209:ENST00000354589:exon31:c.C6278T:p.A2093V,ENSG00000178209:ENST00000354958:exon31:c.C6212T:p.A2071V,ENSG00000178209:ENST00000356346:exon31:c.C6236T:p.A2079V,ENSG00000178209:ENST00000357649:exon31:c.C6290T:p.A2097V,ENSG00000178209:ENST00000398774:exon31:c.C6182T:p.A2061V,…	rs782190474	Uncertain significance	not_specified	RCV000266616.1	MedGen	CN169374
8	144997849	144997849	G	A	exonic	PLEC	.	nonsynonymous SNV	PLEC:NM_201378:exon31:c.C6206T:p.A2069V,PLEC:NM_201379:exon31:c.C6182T:p.A2061V,PLEC:NM_201380:exon31:c.C6659T:p.A2220V,PLEC:NM_201381:exon31:c.C6152T:p.A2051V,PLEC:NM_201382:exon31:c.C6248T:p.A2083V,PLEC:NM_201383:exon31:c.C6260T:p.A2087V,PLEC:NM_201384:exon31:c.C6248T:p.A2083V,PLEC:NM_000445:exon32:c.C6329T:p.A2110V	exonic	ENSG00000178209	.	nonsynonymous SNV	ENSG00000178209:ENST00000322810:exon31:c.C6659T:p.A2220V,ENSG00000178209:ENST00000345136:exon31:c.C6248T:p.A2083V,ENSG00000178209:ENST00000354589:exon31:c.C6248T:p.A2083V,ENSG00000178209:ENST00000354958:exon31:c.C6182T:p.A2061V,ENSG00000178209:ENST00000356346:exon31:c.C6206T:p.A2069V,ENSG00000178209:ENST00000357649:exon31:c.C6260T:p.A2087V,ENSG00000178209:ENST00000398774:exon31:c.C6152T:p.A2051V,…	rs781878105	Uncertain significance	not_specified	RCV000352378.1	MedGen	CN169374
8	144997855	144997855	C	T	exonic	PLEC	.	nonsynonymous SNV	PLEC:NM_201378:exon31:c.G6200A:p.G2067D,PLEC:NM_201379:exon31:c.G6176A:p.G2059D,PLEC:NM_201380:exon31:c.G6653A:p.G2218D,PLEC:NM_201381:exon31:c.G6146A:p.G2049D,PLEC:NM_201382:exon31:c.G6242A:p.G2081D,PLEC:NM_201383:exon31:c.G6254A:p.G2085D,PLEC:NM_201384:exon31:c.G6242A:p.G2081D,PLEC:NM_000445:exon32:c.G6323A:p.G2108D	exonic	ENSG00000178209	.	nonsynonymous SNV	ENSG00000178209:ENST00000322810:exon31:c.G6653A:p.G2218D,ENSG00000178209:ENST00000345136:exon31:c.G6242A:p.G2081D,ENSG00000178209:ENST00000354589:exon31:c.G6242A:p.G2081D,ENSG00000178209:ENST00000354958:exon31:c.G6176A:p.G2059D,ENSG00000178209:ENST00000356346:exon31:c.G6200A:p.G2067D,ENSG00000178209:ENST00000357649:exon31:c.G6254A:p.G2085D,ENSG00000178209:ENST00000398774:exon31:c.G6146A:p.G2049D,…	.	Uncertain significance	not_specified	RCV000381349.1	MedGen	CN169374
8	144997899	144997899	C	A	exonic	PLEC	.	nonsynonymous SNV	PLEC:NM_201378:exon31:c.G6156T:p.Q2052H,PLEC:NM_201379:exon31:c.G6132T:p.Q2044H,PLEC:NM_201380:exon31:c.G6609T:p.Q2203H,PLEC:NM_201381:exon31:c.G6102T:p.Q2034H,PLEC:NM_201382:exon31:c.G6198T:p.Q2066H,PLEC:NM_201383:exon31:c.G6210T:p.Q2070H,PLEC:NM_201384:exon31:c.G6198T:p.Q2066H,PLEC:NM_000445:exon32:c.G6279T:p.Q2093H	exonic	ENSG00000178209	.	nonsynonymous SNV	ENSG00000178209:ENST00000322810:exon31:c.G6609T:p.Q2203H,ENSG00000178209:ENST00000345136:exon31:c.G6198T:p.Q2066H,ENSG00000178209:ENST00000354589:exon31:c.G6198T:p.Q2066H,ENSG00000178209:ENST00000354958:exon31:c.G6132T:p.Q2044H,ENSG00000178209:ENST00000356346:exon31:c.G6156T:p.Q2052H,ENSG00000178209:ENST00000357649:exon31:c.G6210T:p.Q2070H,ENSG00000178209:ENST00000398774:exon31:c.G6102T:p.Q2034H,…	rs201574539	Uncertain significance	not_specified	RCV000177629.2	MedGen	CN169374
8	144997927	144997927	G	A	exonic	PLEC	.	nonsynonymous SNV	PLEC:NM_201378:exon31:c.C6128T:p.A2043V,PLEC:NM_201379:exon31:c.C6104T:p.A2035V,PLEC:NM_201380:exon31:c.C6581T:p.A2194V,PLEC:NM_201381:exon31:c.C6074T:p.A2025V,PLEC:NM_201382:exon31:c.C6170T:p.A2057V,PLEC:NM_201383:exon31:c.C6182T:p.A2061V,PLEC:NM_201384:exon31:c.C6170T:p.A2057V,PLEC:NM_000445:exon32:c.C6251T:p.A2084V	exonic	ENSG00000178209	.	nonsynonymous SNV	ENSG00000178209:ENST00000322810:exon31:c.C6581T:p.A2194V,ENSG00000178209:ENST00000345136:exon31:c.C6170T:p.A2057V,ENSG00000178209:ENST00000354589:exon31:c.C6170T:p.A2057V,ENSG00000178209:ENST00000354958:exon31:c.C6104T:p.A2035V,ENSG00000178209:ENST00000356346:exon31:c.C6128T:p.A2043V,ENSG00000178209:ENST00000357649:exon31:c.C6182T:p.A2061V,ENSG00000178209:ENST00000398774:exon31:c.C6074T:p.A2025V,…	rs7002002	other	not_specified	RCV000078886.9	MedGen	CN169374
8	144997999	144997999	G	A	exonic	PLEC	.	nonsynonymous SNV	PLEC:NM_201378:exon31:c.C6056T:p.A2019V,PLEC:NM_201379:exon31:c.C6032T:p.A2011V,PLEC:NM_201380:exon31:c.C6509T:p.A2170V,PLEC:NM_201381:exon31:c.C6002T:p.A2001V,PLEC:NM_201382:exon31:c.C6098T:p.A2033V,PLEC:NM_201383:exon31:c.C6110T:p.A2037V,PLEC:NM_201384:exon31:c.C6098T:p.A2033V,PLEC:NM_000445:exon32:c.C6179T:p.A2060V	exonic	ENSG00000178209	.	nonsynonymous SNV	ENSG00000178209:ENST00000322810:exon31:c.C6509T:p.A2170V,ENSG00000178209:ENST00000345136:exon31:c.C6098T:p.A2033V,ENSG00000178209:ENST00000354589:exon31:c.C6098T:p.A2033V,ENSG00000178209:ENST00000354958:exon31:c.C6032T:p.A2011V,ENSG00000178209:ENST00000356346:exon31:c.C6056T:p.A2019V,ENSG00000178209:ENST00000357649:exon31:c.C6110T:p.A2037V,ENSG00000178209:ENST00000398774:exon31:c.C6002T:p.A2001V,…	rs782712639	Uncertain significance	not_specified	RCV000301419.2	MedGen	CN169374
8	144998009	144998009	G	A	exonic	PLEC	.	stopgain	PLEC:NM_201378:exon31:c.C6046T:p.Q2016X,PLEC:NM_201379:exon31:c.C6022T:p.Q2008X,PLEC:NM_201380:exon31:c.C6499T:p.Q2167X,PLEC:NM_201381:exon31:c.C5992T:p.Q1998X,PLEC:NM_201382:exon31:c.C6088T:p.Q2030X,PLEC:NM_201383:exon31:c.C6100T:p.Q2034X,PLEC:NM_201384:exon31:c.C6088T:p.Q2030X,PLEC:NM_000445:exon32:c.C6169T:p.Q2057X	exonic	ENSG00000178209	.	stopgain	ENSG00000178209:ENST00000322810:exon31:c.C6499T:p.Q2167X,ENSG00000178209:ENST00000345136:exon31:c.C6088T:p.Q2030X,ENSG00000178209:ENST00000354589:exon31:c.C6088T:p.Q2030X,ENSG00000178209:ENST00000354958:exon31:c.C6022T:p.Q2008X,ENSG00000178209:ENST00000356346:exon31:c.C6046T:p.Q2016X,ENSG00000178209:ENST00000357649:exon31:c.C6100T:p.Q2034X,ENSG00000178209:ENST00000398774:exon31:c.C5992T:p.Q1998X,…	rs387906801	Pathogenic	Epidermolysa_bullosa_simplex_and_limb_girdle_muscular_dystrophy	RCV000023091.8	MedGen:OMIM:Orphanet	C2931072:226670:ORPHA257
8	144998014	144998014	G	A	exonic	PLEC	.	nonsynonymous SNV	PLEC:NM_201378:exon31:c.C6041T:p.A2014V,PLEC:NM_201379:exon31:c.C6017T:p.A2006V,PLEC:NM_201380:exon31:c.C6494T:p.A2165V,PLEC:NM_201381:exon31:c.C5987T:p.A1996V,PLEC:NM_201382:exon31:c.C6083T:p.A2028V,PLEC:NM_201383:exon31:c.C6095T:p.A2032V,PLEC:NM_201384:exon31:c.C6083T:p.A2028V,PLEC:NM_000445:exon32:c.C6164T:p.A2055V	exonic	ENSG00000178209	.	nonsynonymous SNV	ENSG00000178209:ENST00000322810:exon31:c.C6494T:p.A2165V,ENSG00000178209:ENST00000345136:exon31:c.C6083T:p.A2028V,ENSG00000178209:ENST00000354589:exon31:c.C6083T:p.A2028V,ENSG00000178209:ENST00000354958:exon31:c.C6017T:p.A2006V,ENSG00000178209:ENST00000356346:exon31:c.C6041T:p.A2014V,ENSG00000178209:ENST00000357649:exon31:c.C6095T:p.A2032V,ENSG00000178209:ENST00000398774:exon31:c.C5987T:p.A1996V,…	rs781895825	Uncertain significance	not_specified	RCV000177618.1	MedGen	CN169374
8	144998038	144998038	T	G	exonic	PLEC	.	nonsynonymous SNV	PLEC:NM_201378:exon31:c.A6017C:p.E2006A,PLEC:NM_201379:exon31:c.A5993C:p.E1998A,PLEC:NM_201380:exon31:c.A6470C:p.E2157A,PLEC:NM_201381:exon31:c.A5963C:p.E1988A,PLEC:NM_201382:exon31:c.A6059C:p.E2020A,PLEC:NM_201383:exon31:c.A6071C:p.E2024A,PLEC:NM_201384:exon31:c.A6059C:p.E2020A,PLEC:NM_000445:exon32:c.A6140C:p.E2047A	exonic	ENSG00000178209	.	nonsynonymous SNV	ENSG00000178209:ENST00000322810:exon31:c.A6470C:p.E2157A,ENSG00000178209:ENST00000345136:exon31:c.A6059C:p.E2020A,ENSG00000178209:ENST00000354589:exon31:c.A6059C:p.E2020A,ENSG00000178209:ENST00000354958:exon31:c.A5993C:p.E1998A,ENSG00000178209:ENST00000356346:exon31:c.A6017C:p.E2006A,ENSG00000178209:ENST00000357649:exon31:c.A6071C:p.E2024A,ENSG00000178209:ENST00000398774:exon31:c.A5963C:p.E1988A,…	rs367662560	Benign	not_specified	RCV000275745.2	MedGen	CN169374
8	144998096	144998096	C	T	exonic	PLEC	.	nonsynonymous SNV	PLEC:NM_201378:exon31:c.G5959A:p.A1987T,PLEC:NM_201379:exon31:c.G5935A:p.A1979T,PLEC:NM_201380:exon31:c.G6412A:p.A2138T,PLEC:NM_201381:exon31:c.G5905A:p.A1969T,PLEC:NM_201382:exon31:c.G6001A:p.A2001T,PLEC:NM_201383:exon31:c.G6013A:p.A2005T,PLEC:NM_201384:exon31:c.G6001A:p.A2001T,PLEC:NM_000445:exon32:c.G6082A:p.A2028T	exonic	ENSG00000178209	.	nonsynonymous SNV	ENSG00000178209:ENST00000322810:exon31:c.G6412A:p.A2138T,ENSG00000178209:ENST00000345136:exon31:c.G6001A:p.A2001T,ENSG00000178209:ENST00000354589:exon31:c.G6001A:p.A2001T,ENSG00000178209:ENST00000354958:exon31:c.G5935A:p.A1979T,ENSG00000178209:ENST00000356346:exon31:c.G5959A:p.A1987T,ENSG00000178209:ENST00000357649:exon31:c.G6013A:p.A2005T,ENSG00000178209:ENST00000398774:exon31:c.G5905A:p.A1969T,…	rs535202853	Uncertain significance	not_specified	RCV000177627.1	MedGen	CN169374
8	144998116	144998116	A	G	exonic	PLEC	.	nonsynonymous SNV	PLEC:NM_201378:exon31:c.T5939C:p.L1980P,PLEC:NM_201379:exon31:c.T5915C:p.L1972P,PLEC:NM_201380:exon31:c.T6392C:p.L2131P,PLEC:NM_201381:exon31:c.T5885C:p.L1962P,PLEC:NM_201382:exon31:c.T5981C:p.L1994P,PLEC:NM_201383:exon31:c.T5993C:p.L1998P,PLEC:NM_201384:exon31:c.T5981C:p.L1994P,PLEC:NM_000445:exon32:c.T6062C:p.L2021P	exonic	ENSG00000178209	.	nonsynonymous SNV	ENSG00000178209:ENST00000322810:exon31:c.T6392C:p.L2131P,ENSG00000178209:ENST00000345136:exon31:c.T5981C:p.L1994P,ENSG00000178209:ENST00000354589:exon31:c.T5981C:p.L1994P,ENSG00000178209:ENST00000354958:exon31:c.T5915C:p.L1972P,ENSG00000178209:ENST00000356346:exon31:c.T5939C:p.L1980P,ENSG00000178209:ENST00000357649:exon31:c.T5993C:p.L1998P,ENSG00000178209:ENST00000398774:exon31:c.T5885C:p.L1962P,…	.	Uncertain significance	not_specified	RCV000325114.2	MedGen	CN169374
8	144998129	144998129	C	T	exonic	PLEC	.	nonsynonymous SNV	PLEC:NM_201378:exon31:c.G5926A:p.V1976M,PLEC:NM_201379:exon31:c.G5902A:p.V1968M,PLEC:NM_201380:exon31:c.G6379A:p.V2127M,PLEC:NM_201381:exon31:c.G5872A:p.V1958M,PLEC:NM_201382:exon31:c.G5968A:p.V1990M,PLEC:NM_201383:exon31:c.G5980A:p.V1994M,PLEC:NM_201384:exon31:c.G5968A:p.V1990M,PLEC:NM_000445:exon32:c.G6049A:p.V2017M	exonic	ENSG00000178209	.	nonsynonymous SNV	ENSG00000178209:ENST00000322810:exon31:c.G6379A:p.V2127M,ENSG00000178209:ENST00000345136:exon31:c.G5968A:p.V1990M,ENSG00000178209:ENST00000354589:exon31:c.G5968A:p.V1990M,ENSG00000178209:ENST00000354958:exon31:c.G5902A:p.V1968M,ENSG00000178209:ENST00000356346:exon31:c.G5926A:p.V1976M,ENSG00000178209:ENST00000357649:exon31:c.G5980A:p.V1994M,ENSG00000178209:ENST00000398774:exon31:c.G5872A:p.V1958M,…	rs201588551	Uncertain significance	not_specified	RCV000342524.2	MedGen	CN169374
8	144998132	144998132	G	A	exonic	PLEC	.	nonsynonymous SNV	PLEC:NM_201378:exon31:c.C5923T:p.R1975C,PLEC:NM_201379:exon31:c.C5899T:p.R1967C,PLEC:NM_201380:exon31:c.C6376T:p.R2126C,PLEC:NM_201381:exon31:c.C5869T:p.R1957C,PLEC:NM_201382:exon31:c.C5965T:p.R1989C,PLEC:NM_201383:exon31:c.C5977T:p.R1993C,PLEC:NM_201384:exon31:c.C5965T:p.R1989C,PLEC:NM_000445:exon32:c.C6046T:p.R2016C	exonic	ENSG00000178209	.	nonsynonymous SNV	ENSG00000178209:ENST00000322810:exon31:c.C6376T:p.R2126C,ENSG00000178209:ENST00000345136:exon31:c.C5965T:p.R1989C,ENSG00000178209:ENST00000354589:exon31:c.C5965T:p.R1989C,ENSG00000178209:ENST00000354958:exon31:c.C5899T:p.R1967C,ENSG00000178209:ENST00000356346:exon31:c.C5923T:p.R1975C,ENSG00000178209:ENST00000357649:exon31:c.C5977T:p.R1993C,ENSG00000178209:ENST00000398774:exon31:c.C5869T:p.R1957C,…	rs201465091	Uncertain significance	not_specified	RCV000177599.3	MedGen	CN169374
8	144998132	144998132	G	T	exonic	PLEC	.	nonsynonymous SNV	PLEC:NM_201378:exon31:c.C5923A:p.R1975S,PLEC:NM_201379:exon31:c.C5899A:p.R1967S,PLEC:NM_201380:exon31:c.C6376A:p.R2126S,PLEC:NM_201381:exon31:c.C5869A:p.R1957S,PLEC:NM_201382:exon31:c.C5965A:p.R1989S,PLEC:NM_201383:exon31:c.C5977A:p.R1993S,PLEC:NM_201384:exon31:c.C5965A:p.R1989S,PLEC:NM_000445:exon32:c.C6046A:p.R2016S	exonic	ENSG00000178209	.	nonsynonymous SNV	ENSG00000178209:ENST00000322810:exon31:c.C6376A:p.R2126S,ENSG00000178209:ENST00000345136:exon31:c.C5965A:p.R1989S,ENSG00000178209:ENST00000354589:exon31:c.C5965A:p.R1989S,ENSG00000178209:ENST00000354958:exon31:c.C5899A:p.R1967S,ENSG00000178209:ENST00000356346:exon31:c.C5923A:p.R1975S,ENSG00000178209:ENST00000357649:exon31:c.C5977A:p.R1993S,ENSG00000178209:ENST00000398774:exon31:c.C5869A:p.R1957S,…	rs201465091	Uncertain significance	not_specified	RCV000177608.1	MedGen	CN169374
8	144998149	144998149	C	T	exonic	PLEC	.	nonsynonymous SNV	PLEC:NM_201378:exon31:c.G5906A:p.R1969H,PLEC:NM_201379:exon31:c.G5882A:p.R1961H,PLEC:NM_201380:exon31:c.G6359A:p.R2120H,PLEC:NM_201381:exon31:c.G5852A:p.R1951H,PLEC:NM_201382:exon31:c.G5948A:p.R1983H,PLEC:NM_201383:exon31:c.G5960A:p.R1987H,PLEC:NM_201384:exon31:c.G5948A:p.R1983H,PLEC:NM_000445:exon32:c.G6029A:p.R2010H	exonic	ENSG00000178209	.	nonsynonymous SNV	ENSG00000178209:ENST00000322810:exon31:c.G6359A:p.R2120H,ENSG00000178209:ENST00000345136:exon31:c.G5948A:p.R1983H,ENSG00000178209:ENST00000354589:exon31:c.G5948A:p.R1983H,ENSG00000178209:ENST00000354958:exon31:c.G5882A:p.R1961H,ENSG00000178209:ENST00000356346:exon31:c.G5906A:p.R1969H,ENSG00000178209:ENST00000357649:exon31:c.G5960A:p.R1987H,ENSG00000178209:ENST00000398774:exon31:c.G5852A:p.R1951H,…	rs527947459	Uncertain significance	not_specified	RCV000177623.1	MedGen	CN169374
8	144998165	144998165	C	A	exonic	PLEC	.	stopgain	PLEC:NM_201378:exon31:c.G5890T:p.E1964X,PLEC:NM_201379:exon31:c.G5866T:p.E1956X,PLEC:NM_201380:exon31:c.G6343T:p.E2115X,PLEC:NM_201381:exon31:c.G5836T:p.E1946X,PLEC:NM_201382:exon31:c.G5932T:p.E1978X,PLEC:NM_201383:exon31:c.G5944T:p.E1982X,PLEC:NM_201384:exon31:c.G5932T:p.E1978X,PLEC:NM_000445:exon32:c.G6013T:p.E2005X	exonic	ENSG00000178209	.	stopgain	ENSG00000178209:ENST00000322810:exon31:c.G6343T:p.E2115X,ENSG00000178209:ENST00000345136:exon31:c.G5932T:p.E1978X,ENSG00000178209:ENST00000354589:exon31:c.G5932T:p.E1978X,ENSG00000178209:ENST00000354958:exon31:c.G5866T:p.E1956X,ENSG00000178209:ENST00000356346:exon31:c.G5890T:p.E1964X,ENSG00000178209:ENST00000357649:exon31:c.G5944T:p.E1982X,ENSG00000178209:ENST00000398774:exon31:c.G5836T:p.E1946X,…	rs864309635	Pathogenic	not_provided	RCV000203174.1	MedGen	CN221809
8	144998167	144998167	G	A	exonic	PLEC	.	nonsynonymous SNV	PLEC:NM_201378:exon31:c.C5888T:p.A1963V,PLEC:NM_201379:exon31:c.C5864T:p.A1955V,PLEC:NM_201380:exon31:c.C6341T:p.A2114V,PLEC:NM_201381:exon31:c.C5834T:p.A1945V,PLEC:NM_201382:exon31:c.C5930T:p.A1977V,PLEC:NM_201383:exon31:c.C5942T:p.A1981V,PLEC:NM_201384:exon31:c.C5930T:p.A1977V,PLEC:NM_000445:exon32:c.C6011T:p.A2004V	exonic	ENSG00000178209	.	nonsynonymous SNV	ENSG00000178209:ENST00000322810:exon31:c.C6341T:p.A2114V,ENSG00000178209:ENST00000345136:exon31:c.C5930T:p.A1977V,ENSG00000178209:ENST00000354589:exon31:c.C5930T:p.A1977V,ENSG00000178209:ENST00000354958:exon31:c.C5864T:p.A1955V,ENSG00000178209:ENST00000356346:exon31:c.C5888T:p.A1963V,ENSG00000178209:ENST00000357649:exon31:c.C5942T:p.A1981V,ENSG00000178209:ENST00000398774:exon31:c.C5834T:p.A1945V,…	rs398123401	Uncertain significance	not_specified	RCV000078884.4	MedGen	CN169374
8	144998175	144998175	C	G	exonic	PLEC	.	nonsynonymous SNV	PLEC:NM_201378:exon31:c.G5880C:p.Q1960H,PLEC:NM_201379:exon31:c.G5856C:p.Q1952H,PLEC:NM_201380:exon31:c.G6333C:p.Q2111H,PLEC:NM_201381:exon31:c.G5826C:p.Q1942H,PLEC:NM_201382:exon31:c.G5922C:p.Q1974H,PLEC:NM_201383:exon31:c.G5934C:p.Q1978H,PLEC:NM_201384:exon31:c.G5922C:p.Q1974H,PLEC:NM_000445:exon32:c.G6003C:p.Q2001H	exonic	ENSG00000178209	.	nonsynonymous SNV	ENSG00000178209:ENST00000322810:exon31:c.G6333C:p.Q2111H,ENSG00000178209:ENST00000345136:exon31:c.G5922C:p.Q1974H,ENSG00000178209:ENST00000354589:exon31:c.G5922C:p.Q1974H,ENSG00000178209:ENST00000354958:exon31:c.G5856C:p.Q1952H,ENSG00000178209:ENST00000356346:exon31:c.G5880C:p.Q1960H,ENSG00000178209:ENST00000357649:exon31:c.G5934C:p.Q1978H,ENSG00000178209:ENST00000398774:exon31:c.G5826C:p.Q1942H,…	rs202190540	other	not_specified	RCV000177625.4	MedGen	CN169374
8	144998180	144998180	G	A	exonic	PLEC	.	nonsynonymous SNV	PLEC:NM_201378:exon31:c.C5875T:p.R1959W,PLEC:NM_201379:exon31:c.C5851T:p.R1951W,PLEC:NM_201380:exon31:c.C6328T:p.R2110W,PLEC:NM_201381:exon31:c.C5821T:p.R1941W,PLEC:NM_201382:exon31:c.C5917T:p.R1973W,PLEC:NM_201383:exon31:c.C5929T:p.R1977W,PLEC:NM_201384:exon31:c.C5917T:p.R1973W,PLEC:NM_000445:exon32:c.C5998T:p.R2000W	exonic	ENSG00000178209	.	nonsynonymous SNV	ENSG00000178209:ENST00000322810:exon31:c.C6328T:p.R2110W,ENSG00000178209:ENST00000345136:exon31:c.C5917T:p.R1973W,ENSG00000178209:ENST00000354589:exon31:c.C5917T:p.R1973W,ENSG00000178209:ENST00000354958:exon31:c.C5851T:p.R1951W,ENSG00000178209:ENST00000356346:exon31:c.C5875T:p.R1959W,ENSG00000178209:ENST00000357649:exon31:c.C5929T:p.R1977W,ENSG00000178209:ENST00000398774:exon31:c.C5821T:p.R1941W,…	rs80338756	Pathogenic	Epidermolysis_bullosa_simplex,_Ogna_type	RCV000008751.6	MedGen:OMIM:Orphanet:SNOMED_CT	C0432317:131950:ORPHA79401:398071000
8	144998219	144998219	G	A	exonic	PLEC	.	nonsynonymous SNV	PLEC:NM_201378:exon31:c.C5836T:p.R1946C,PLEC:NM_201379:exon31:c.C5812T:p.R1938C,PLEC:NM_201380:exon31:c.C6289T:p.R2097C,PLEC:NM_201381:exon31:c.C5782T:p.R1928C,PLEC:NM_201382:exon31:c.C5878T:p.R1960C,PLEC:NM_201383:exon31:c.C5890T:p.R1964C,PLEC:NM_201384:exon31:c.C5878T:p.R1960C,PLEC:NM_000445:exon32:c.C5959T:p.R1987C	exonic	ENSG00000178209	.	nonsynonymous SNV	ENSG00000178209:ENST00000322810:exon31:c.C6289T:p.R2097C,ENSG00000178209:ENST00000345136:exon31:c.C5878T:p.R1960C,ENSG00000178209:ENST00000354589:exon31:c.C5878T:p.R1960C,ENSG00000178209:ENST00000354958:exon31:c.C5812T:p.R1938C,ENSG00000178209:ENST00000356346:exon31:c.C5836T:p.R1946C,ENSG00000178209:ENST00000357649:exon31:c.C5890T:p.R1964C,ENSG00000178209:ENST00000398774:exon31:c.C5782T:p.R1928C,…	rs540421549	Uncertain significance	not_specified	RCV000177596.1	MedGen	CN169374
8	144998224	144998224	G	A	exonic	PLEC	.	nonsynonymous SNV	PLEC:NM_201378:exon31:c.C5831T:p.T1944M,PLEC:NM_201379:exon31:c.C5807T:p.T1936M,PLEC:NM_201380:exon31:c.C6284T:p.T2095M,PLEC:NM_201381:exon31:c.C5777T:p.T1926M,PLEC:NM_201382:exon31:c.C5873T:p.T1958M,PLEC:NM_201383:exon31:c.C5885T:p.T1962M,PLEC:NM_201384:exon31:c.C5873T:p.T1958M,PLEC:NM_000445:exon32:c.C5954T:p.T1985M	exonic	ENSG00000178209	.	nonsynonymous SNV	ENSG00000178209:ENST00000322810:exon31:c.C6284T:p.T2095M,ENSG00000178209:ENST00000345136:exon31:c.C5873T:p.T1958M,ENSG00000178209:ENST00000354589:exon31:c.C5873T:p.T1958M,ENSG00000178209:ENST00000354958:exon31:c.C5807T:p.T1936M,ENSG00000178209:ENST00000356346:exon31:c.C5831T:p.T1944M,ENSG00000178209:ENST00000357649:exon31:c.C5885T:p.T1962M,ENSG00000178209:ENST00000398774:exon31:c.C5777T:p.T1926M,…	rs200715520	Uncertain significance	not_specified	RCV000177622.1	MedGen	CN169374
8	144998249	144998249	G	A	exonic	PLEC	.	nonsynonymous SNV	PLEC:NM_201378:exon31:c.C5806T:p.R1936C,PLEC:NM_201379:exon31:c.C5782T:p.R1928C,PLEC:NM_201380:exon31:c.C6259T:p.R2087C,PLEC:NM_201381:exon31:c.C5752T:p.R1918C,PLEC:NM_201382:exon31:c.C5848T:p.R1950C,PLEC:NM_201383:exon31:c.C5860T:p.R1954C,PLEC:NM_201384:exon31:c.C5848T:p.R1950C,PLEC:NM_000445:exon32:c.C5929T:p.R1977C	exonic	ENSG00000178209	.	nonsynonymous SNV	ENSG00000178209:ENST00000322810:exon31:c.C6259T:p.R2087C,ENSG00000178209:ENST00000345136:exon31:c.C5848T:p.R1950C,ENSG00000178209:ENST00000354589:exon31:c.C5848T:p.R1950C,ENSG00000178209:ENST00000354958:exon31:c.C5782T:p.R1928C,ENSG00000178209:ENST00000356346:exon31:c.C5806T:p.R1936C,ENSG00000178209:ENST00000357649:exon31:c.C5860T:p.R1954C,ENSG00000178209:ENST00000398774:exon31:c.C5752T:p.R1918C,…	rs566539439	Uncertain significance	not_specified	RCV000264624.1	MedGen	CN169374
8	144998272	144998272	G	A	exonic	PLEC	.	nonsynonymous SNV	PLEC:NM_201378:exon31:c.C5783T:p.A1928V,PLEC:NM_201379:exon31:c.C5759T:p.A1920V,PLEC:NM_201380:exon31:c.C6236T:p.A2079V,PLEC:NM_201381:exon31:c.C5729T:p.A1910V,PLEC:NM_201382:exon31:c.C5825T:p.A1942V,PLEC:NM_201383:exon31:c.C5837T:p.A1946V,PLEC:NM_201384:exon31:c.C5825T:p.A1942V,PLEC:NM_000445:exon32:c.C5906T:p.A1969V	exonic	ENSG00000178209	.	nonsynonymous SNV	ENSG00000178209:ENST00000322810:exon31:c.C6236T:p.A2079V,ENSG00000178209:ENST00000345136:exon31:c.C5825T:p.A1942V,ENSG00000178209:ENST00000354589:exon31:c.C5825T:p.A1942V,ENSG00000178209:ENST00000354958:exon31:c.C5759T:p.A1920V,ENSG00000178209:ENST00000356346:exon31:c.C5783T:p.A1928V,ENSG00000178209:ENST00000357649:exon31:c.C5837T:p.A1946V,ENSG00000178209:ENST00000398774:exon31:c.C5729T:p.A1910V,…	rs372179538	Uncertain significance	not_specified	RCV000216854.1	MedGen	CN169374
8	144998282	144998282	C	T	exonic	PLEC	.	nonsynonymous SNV	PLEC:NM_201378:exon31:c.G5773A:p.A1925T,PLEC:NM_201379:exon31:c.G5749A:p.A1917T,PLEC:NM_201380:exon31:c.G6226A:p.A2076T,PLEC:NM_201381:exon31:c.G5719A:p.A1907T,PLEC:NM_201382:exon31:c.G5815A:p.A1939T,PLEC:NM_201383:exon31:c.G5827A:p.A1943T,PLEC:NM_201384:exon31:c.G5815A:p.A1939T,PLEC:NM_000445:exon32:c.G5896A:p.A1966T	exonic	ENSG00000178209	.	nonsynonymous SNV	ENSG00000178209:ENST00000322810:exon31:c.G6226A:p.A2076T,ENSG00000178209:ENST00000345136:exon31:c.G5815A:p.A1939T,ENSG00000178209:ENST00000354589:exon31:c.G5815A:p.A1939T,ENSG00000178209:ENST00000354958:exon31:c.G5749A:p.A1917T,ENSG00000178209:ENST00000356346:exon31:c.G5773A:p.A1925T,ENSG00000178209:ENST00000357649:exon31:c.G5827A:p.A1943T,ENSG00000178209:ENST00000398774:exon31:c.G5719A:p.A1907T,…	rs375422079	Uncertain significance	not_specified	RCV000260039.1	MedGen	CN169374
8	144998336	144998336	G	A	exonic	PLEC	.	nonsynonymous SNV	PLEC:NM_201378:exon31:c.C5719T:p.R1907W,PLEC:NM_201379:exon31:c.C5695T:p.R1899W,PLEC:NM_201380:exon31:c.C6172T:p.R2058W,PLEC:NM_201381:exon31:c.C5665T:p.R1889W,PLEC:NM_201382:exon31:c.C5761T:p.R1921W,PLEC:NM_201383:exon31:c.C5773T:p.R1925W,PLEC:NM_201384:exon31:c.C5761T:p.R1921W,PLEC:NM_000445:exon32:c.C5842T:p.R1948W	exonic	ENSG00000178209	.	nonsynonymous SNV	ENSG00000178209:ENST00000322810:exon31:c.C6172T:p.R2058W,ENSG00000178209:ENST00000345136:exon31:c.C5761T:p.R1921W,ENSG00000178209:ENST00000354589:exon31:c.C5761T:p.R1921W,ENSG00000178209:ENST00000354958:exon31:c.C5695T:p.R1899W,ENSG00000178209:ENST00000356346:exon31:c.C5719T:p.R1907W,ENSG00000178209:ENST00000357649:exon31:c.C5773T:p.R1925W,ENSG00000178209:ENST00000398774:exon31:c.C5665T:p.R1889W,…	rs201278290	Uncertain significance	not_specified	RCV000194194.1	MedGen	CN169374
8	144998444	144998444	C	T	exonic	PLEC	.	nonsynonymous SNV	PLEC:NM_201378:exon31:c.G5611A:p.A1871T,PLEC:NM_201379:exon31:c.G5587A:p.A1863T,PLEC:NM_201380:exon31:c.G6064A:p.A2022T,PLEC:NM_201381:exon31:c.G5557A:p.A1853T,PLEC:NM_201382:exon31:c.G5653A:p.A1885T,PLEC:NM_201383:exon31:c.G5665A:p.A1889T,PLEC:NM_201384:exon31:c.G5653A:p.A1885T,PLEC:NM_000445:exon32:c.G5734A:p.A1912T	exonic	ENSG00000178209	.	nonsynonymous SNV	ENSG00000178209:ENST00000322810:exon31:c.G6064A:p.A2022T,ENSG00000178209:ENST00000345136:exon31:c.G5653A:p.A1885T,ENSG00000178209:ENST00000354589:exon31:c.G5653A:p.A1885T,ENSG00000178209:ENST00000354958:exon31:c.G5587A:p.A1863T,ENSG00000178209:ENST00000356346:exon31:c.G5611A:p.A1871T,ENSG00000178209:ENST00000357649:exon31:c.G5665A:p.A1889T,ENSG00000178209:ENST00000398774:exon31:c.G5557A:p.A1853T,…	rs201070741	Benign	not_specified	RCV000336740.3	MedGen	CN169374
8	144998464	144998464	C	T	exonic	PLEC	.	nonsynonymous SNV	PLEC:NM_201378:exon31:c.G5591A:p.R1864Q,PLEC:NM_201379:exon31:c.G5567A:p.R1856Q,PLEC:NM_201380:exon31:c.G6044A:p.R2015Q,PLEC:NM_201381:exon31:c.G5537A:p.R1846Q,PLEC:NM_201382:exon31:c.G5633A:p.R1878Q,PLEC:NM_201383:exon31:c.G5645A:p.R1882Q,PLEC:NM_201384:exon31:c.G5633A:p.R1878Q,PLEC:NM_000445:exon32:c.G5714A:p.R1905Q	exonic	ENSG00000178209	.	nonsynonymous SNV	ENSG00000178209:ENST00000322810:exon31:c.G6044A:p.R2015Q,ENSG00000178209:ENST00000345136:exon31:c.G5633A:p.R1878Q,ENSG00000178209:ENST00000354589:exon31:c.G5633A:p.R1878Q,ENSG00000178209:ENST00000354958:exon31:c.G5567A:p.R1856Q,ENSG00000178209:ENST00000356346:exon31:c.G5591A:p.R1864Q,ENSG00000178209:ENST00000357649:exon31:c.G5645A:p.R1882Q,ENSG00000178209:ENST00000398774:exon31:c.G5537A:p.R1846Q,…	rs373617951	Uncertain significance|Uncertain significance	not_specified|not_provided	RCV000349984.2|RCV000416273.1	MedGen|MedGen	CN169374|CN221809
8	144998504	144998504	G	A	exonic	PLEC	.	nonsynonymous SNV	PLEC:NM_201378:exon31:c.C5551T:p.R1851C,PLEC:NM_201379:exon31:c.C5527T:p.R1843C,PLEC:NM_201380:exon31:c.C6004T:p.R2002C,PLEC:NM_201381:exon31:c.C5497T:p.R1833C,PLEC:NM_201382:exon31:c.C5593T:p.R1865C,PLEC:NM_201383:exon31:c.C5605T:p.R1869C,PLEC:NM_201384:exon31:c.C5593T:p.R1865C,PLEC:NM_000445:exon32:c.C5674T:p.R1892C	exonic	ENSG00000178209	.	nonsynonymous SNV	ENSG00000178209:ENST00000322810:exon31:c.C6004T:p.R2002C,ENSG00000178209:ENST00000345136:exon31:c.C5593T:p.R1865C,ENSG00000178209:ENST00000354589:exon31:c.C5593T:p.R1865C,ENSG00000178209:ENST00000354958:exon31:c.C5527T:p.R1843C,ENSG00000178209:ENST00000356346:exon31:c.C5551T:p.R1851C,ENSG00000178209:ENST00000357649:exon31:c.C5605T:p.R1869C,ENSG00000178209:ENST00000398774:exon31:c.C5497T:p.R1833C,…	rs372018272	Uncertain significance	not_specified	RCV000276265.2	MedGen	CN169374
8	144998557	144998557	C	T	exonic	PLEC	.	nonsynonymous SNV	PLEC:NM_201378:exon31:c.G5498A:p.R1833Q,PLEC:NM_201379:exon31:c.G5474A:p.R1825Q,PLEC:NM_201380:exon31:c.G5951A:p.R1984Q,PLEC:NM_201381:exon31:c.G5444A:p.R1815Q,PLEC:NM_201382:exon31:c.G5540A:p.R1847Q,PLEC:NM_201383:exon31:c.G5552A:p.R1851Q,PLEC:NM_201384:exon31:c.G5540A:p.R1847Q,PLEC:NM_000445:exon32:c.G5621A:p.R1874Q	exonic	ENSG00000178209	.	nonsynonymous SNV	ENSG00000178209:ENST00000322810:exon31:c.G5951A:p.R1984Q,ENSG00000178209:ENST00000345136:exon31:c.G5540A:p.R1847Q,ENSG00000178209:ENST00000354589:exon31:c.G5540A:p.R1847Q,ENSG00000178209:ENST00000354958:exon31:c.G5474A:p.R1825Q,ENSG00000178209:ENST00000356346:exon31:c.G5498A:p.R1833Q,ENSG00000178209:ENST00000357649:exon31:c.G5552A:p.R1851Q,ENSG00000178209:ENST00000398774:exon31:c.G5444A:p.R1815Q,…	rs577374823	Uncertain significance	not_specified	RCV000177607.3	MedGen	CN169374
8	144998576	144998576	C	T	exonic	PLEC	.	nonsynonymous SNV	PLEC:NM_201378:exon31:c.G5479A:p.A1827T,PLEC:NM_201379:exon31:c.G5455A:p.A1819T,PLEC:NM_201380:exon31:c.G5932A:p.A1978T,PLEC:NM_201381:exon31:c.G5425A:p.A1809T,PLEC:NM_201382:exon31:c.G5521A:p.A1841T,PLEC:NM_201383:exon31:c.G5533A:p.A1845T,PLEC:NM_201384:exon31:c.G5521A:p.A1841T,PLEC:NM_000445:exon32:c.G5602A:p.A1868T	exonic	ENSG00000178209	.	nonsynonymous SNV	ENSG00000178209:ENST00000322810:exon31:c.G5932A:p.A1978T,ENSG00000178209:ENST00000345136:exon31:c.G5521A:p.A1841T,ENSG00000178209:ENST00000354589:exon31:c.G5521A:p.A1841T,ENSG00000178209:ENST00000354958:exon31:c.G5455A:p.A1819T,ENSG00000178209:ENST00000356346:exon31:c.G5479A:p.A1827T,ENSG00000178209:ENST00000357649:exon31:c.G5533A:p.A1845T,ENSG00000178209:ENST00000398774:exon31:c.G5425A:p.A1809T,…	rs201657125	Uncertain significance	not_specified	RCV000358773.1	MedGen	CN169374
8	144998620	144998620	C	T	exonic	PLEC	.	nonsynonymous SNV	PLEC:NM_201378:exon31:c.G5435A:p.R1812Q,PLEC:NM_201379:exon31:c.G5411A:p.R1804Q,PLEC:NM_201380:exon31:c.G5888A:p.R1963Q,PLEC:NM_201381:exon31:c.G5381A:p.R1794Q,PLEC:NM_201382:exon31:c.G5477A:p.R1826Q,PLEC:NM_201383:exon31:c.G5489A:p.R1830Q,PLEC:NM_201384:exon31:c.G5477A:p.R1826Q,PLEC:NM_000445:exon32:c.G5558A:p.R1853Q	exonic	ENSG00000178209	.	nonsynonymous SNV	ENSG00000178209:ENST00000322810:exon31:c.G5888A:p.R1963Q,ENSG00000178209:ENST00000345136:exon31:c.G5477A:p.R1826Q,ENSG00000178209:ENST00000354589:exon31:c.G5477A:p.R1826Q,ENSG00000178209:ENST00000354958:exon31:c.G5411A:p.R1804Q,ENSG00000178209:ENST00000356346:exon31:c.G5435A:p.R1812Q,ENSG00000178209:ENST00000357649:exon31:c.G5489A:p.R1830Q,ENSG00000178209:ENST00000398774:exon31:c.G5381A:p.R1794Q,…	rs147838690	other|Benign	not_specified|not_provided	RCV000078878.8|RCV000424593.1	MedGen|MedGen	CN169374|CN221809
8	144998621	144998621	G	A	exonic	PLEC	.	nonsynonymous SNV	PLEC:NM_201378:exon31:c.C5434T:p.R1812W,PLEC:NM_201379:exon31:c.C5410T:p.R1804W,PLEC:NM_201380:exon31:c.C5887T:p.R1963W,PLEC:NM_201381:exon31:c.C5380T:p.R1794W,PLEC:NM_201382:exon31:c.C5476T:p.R1826W,PLEC:NM_201383:exon31:c.C5488T:p.R1830W,PLEC:NM_201384:exon31:c.C5476T:p.R1826W,PLEC:NM_000445:exon32:c.C5557T:p.R1853W	exonic	ENSG00000178209	.	nonsynonymous SNV	ENSG00000178209:ENST00000322810:exon31:c.C5887T:p.R1963W,ENSG00000178209:ENST00000345136:exon31:c.C5476T:p.R1826W,ENSG00000178209:ENST00000354589:exon31:c.C5476T:p.R1826W,ENSG00000178209:ENST00000354958:exon31:c.C5410T:p.R1804W,ENSG00000178209:ENST00000356346:exon31:c.C5434T:p.R1812W,ENSG00000178209:ENST00000357649:exon31:c.C5488T:p.R1830W,ENSG00000178209:ENST00000398774:exon31:c.C5380T:p.R1794W,…	rs200575795	other	not_specified	RCV000153737.6	MedGen	CN169374
8	144998626	144998626	G	A	exonic	PLEC	.	nonsynonymous SNV	PLEC:NM_201378:exon31:c.C5429T:p.A1810V,PLEC:NM_201379:exon31:c.C5405T:p.A1802V,PLEC:NM_201380:exon31:c.C5882T:p.A1961V,PLEC:NM_201381:exon31:c.C5375T:p.A1792V,PLEC:NM_201382:exon31:c.C5471T:p.A1824V,PLEC:NM_201383:exon31:c.C5483T:p.A1828V,PLEC:NM_201384:exon31:c.C5471T:p.A1824V,PLEC:NM_000445:exon32:c.C5552T:p.A1851V	exonic	ENSG00000178209	.	nonsynonymous SNV	ENSG00000178209:ENST00000322810:exon31:c.C5882T:p.A1961V,ENSG00000178209:ENST00000345136:exon31:c.C5471T:p.A1824V,ENSG00000178209:ENST00000354589:exon31:c.C5471T:p.A1824V,ENSG00000178209:ENST00000354958:exon31:c.C5405T:p.A1802V,ENSG00000178209:ENST00000356346:exon31:c.C5429T:p.A1810V,ENSG00000178209:ENST00000357649:exon31:c.C5483T:p.A1828V,ENSG00000178209:ENST00000398774:exon31:c.C5375T:p.A1792V,…	rs542642242	other	not_specified	RCV000177628.2	MedGen	CN169374
8	144998654	144998654	G	A	exonic	PLEC	.	nonsynonymous SNV	PLEC:NM_201378:exon31:c.C5401T:p.R1801W,PLEC:NM_201379:exon31:c.C5377T:p.R1793W,PLEC:NM_201380:exon31:c.C5854T:p.R1952W,PLEC:NM_201381:exon31:c.C5347T:p.R1783W,PLEC:NM_201382:exon31:c.C5443T:p.R1815W,PLEC:NM_201383:exon31:c.C5455T:p.R1819W,PLEC:NM_201384:exon31:c.C5443T:p.R1815W,PLEC:NM_000445:exon32:c.C5524T:p.R1842W	exonic	ENSG00000178209	.	nonsynonymous SNV	ENSG00000178209:ENST00000322810:exon31:c.C5854T:p.R1952W,ENSG00000178209:ENST00000345136:exon31:c.C5443T:p.R1815W,ENSG00000178209:ENST00000354589:exon31:c.C5443T:p.R1815W,ENSG00000178209:ENST00000354958:exon31:c.C5377T:p.R1793W,ENSG00000178209:ENST00000356346:exon31:c.C5401T:p.R1801W,ENSG00000178209:ENST00000357649:exon31:c.C5455T:p.R1819W,ENSG00000178209:ENST00000398774:exon31:c.C5347T:p.R1783W,…	rs398123400	other	not_specified	RCV000078877.5	MedGen	CN169374
8	144998683	144998683	C	T	exonic	PLEC	.	nonsynonymous SNV	PLEC:NM_201378:exon31:c.G5372A:p.R1791H,PLEC:NM_201379:exon31:c.G5348A:p.R1783H,PLEC:NM_201380:exon31:c.G5825A:p.R1942H,PLEC:NM_201381:exon31:c.G5318A:p.R1773H,PLEC:NM_201382:exon31:c.G5414A:p.R1805H,PLEC:NM_201383:exon31:c.G5426A:p.R1809H,PLEC:NM_201384:exon31:c.G5414A:p.R1805H,PLEC:NM_000445:exon32:c.G5495A:p.R1832H	exonic	ENSG00000178209	.	nonsynonymous SNV	ENSG00000178209:ENST00000322810:exon31:c.G5825A:p.R1942H,ENSG00000178209:ENST00000345136:exon31:c.G5414A:p.R1805H,ENSG00000178209:ENST00000354589:exon31:c.G5414A:p.R1805H,ENSG00000178209:ENST00000354958:exon31:c.G5348A:p.R1783H,ENSG00000178209:ENST00000356346:exon31:c.G5372A:p.R1791H,ENSG00000178209:ENST00000357649:exon31:c.G5426A:p.R1809H,ENSG00000178209:ENST00000398774:exon31:c.G5318A:p.R1773H,…	rs782438887	Uncertain significance	not_specified	RCV000264291.2	MedGen	CN169374
8	144998707	144998707	C	T	exonic	PLEC	.	nonsynonymous SNV	PLEC:NM_201378:exon31:c.G5348A:p.R1783H,PLEC:NM_201379:exon31:c.G5324A:p.R1775H,PLEC:NM_201380:exon31:c.G5801A:p.R1934H,PLEC:NM_201381:exon31:c.G5294A:p.R1765H,PLEC:NM_201382:exon31:c.G5390A:p.R1797H,PLEC:NM_201383:exon31:c.G5402A:p.R1801H,PLEC:NM_201384:exon31:c.G5390A:p.R1797H,PLEC:NM_000445:exon32:c.G5471A:p.R1824H	exonic	ENSG00000178209	.	nonsynonymous SNV	ENSG00000178209:ENST00000322810:exon31:c.G5801A:p.R1934H,ENSG00000178209:ENST00000345136:exon31:c.G5390A:p.R1797H,ENSG00000178209:ENST00000354589:exon31:c.G5390A:p.R1797H,ENSG00000178209:ENST00000354958:exon31:c.G5324A:p.R1775H,ENSG00000178209:ENST00000356346:exon31:c.G5348A:p.R1783H,ENSG00000178209:ENST00000357649:exon31:c.G5402A:p.R1801H,ENSG00000178209:ENST00000398774:exon31:c.G5294A:p.R1765H,…	rs782581787	Uncertain significance	not_specified	RCV000177582.1	MedGen	CN169374
8	144998766	144998766	C	G	exonic	PLEC	.	nonsynonymous SNV	PLEC:NM_201378:exon31:c.G5289C:p.E1763D,PLEC:NM_201379:exon31:c.G5265C:p.E1755D,PLEC:NM_201380:exon31:c.G5742C:p.E1914D,PLEC:NM_201381:exon31:c.G5235C:p.E1745D,PLEC:NM_201382:exon31:c.G5331C:p.E1777D,PLEC:NM_201383:exon31:c.G5343C:p.E1781D,PLEC:NM_201384:exon31:c.G5331C:p.E1777D,PLEC:NM_000445:exon32:c.G5412C:p.E1804D	exonic	ENSG00000178209	.	nonsynonymous SNV	ENSG00000178209:ENST00000322810:exon31:c.G5742C:p.E1914D,ENSG00000178209:ENST00000345136:exon31:c.G5331C:p.E1777D,ENSG00000178209:ENST00000354589:exon31:c.G5331C:p.E1777D,ENSG00000178209:ENST00000354958:exon31:c.G5265C:p.E1755D,ENSG00000178209:ENST00000356346:exon31:c.G5289C:p.E1763D,ENSG00000178209:ENST00000357649:exon31:c.G5343C:p.E1781D,ENSG00000178209:ENST00000398774:exon31:c.G5235C:p.E1745D,…	rs774270631	Uncertain significance	not_specified	RCV000260265.2	MedGen	CN169374
8	144998782	144998782	G	A	exonic	PLEC	.	nonsynonymous SNV	PLEC:NM_201378:exon31:c.C5273T:p.A1758V,PLEC:NM_201379:exon31:c.C5249T:p.A1750V,PLEC:NM_201380:exon31:c.C5726T:p.A1909V,PLEC:NM_201381:exon31:c.C5219T:p.A1740V,PLEC:NM_201382:exon31:c.C5315T:p.A1772V,PLEC:NM_201383:exon31:c.C5327T:p.A1776V,PLEC:NM_201384:exon31:c.C5315T:p.A1772V,PLEC:NM_000445:exon32:c.C5396T:p.A1799V	exonic	ENSG00000178209	.	nonsynonymous SNV	ENSG00000178209:ENST00000322810:exon31:c.C5726T:p.A1909V,ENSG00000178209:ENST00000345136:exon31:c.C5315T:p.A1772V,ENSG00000178209:ENST00000354589:exon31:c.C5315T:p.A1772V,ENSG00000178209:ENST00000354958:exon31:c.C5249T:p.A1750V,ENSG00000178209:ENST00000356346:exon31:c.C5273T:p.A1758V,ENSG00000178209:ENST00000357649:exon31:c.C5327T:p.A1776V,ENSG00000178209:ENST00000398774:exon31:c.C5219T:p.A1740V,…	rs782439290	Uncertain significance	not_specified	RCV000177631.1	MedGen	CN169374
8	144998813	144998813	C	T	exonic	PLEC	.	nonsynonymous SNV	PLEC:NM_201378:exon31:c.G5242A:p.A1748T,PLEC:NM_201379:exon31:c.G5218A:p.A1740T,PLEC:NM_201380:exon31:c.G5695A:p.A1899T,PLEC:NM_201381:exon31:c.G5188A:p.A1730T,PLEC:NM_201382:exon31:c.G5284A:p.A1762T,PLEC:NM_201383:exon31:c.G5296A:p.A1766T,PLEC:NM_201384:exon31:c.G5284A:p.A1762T,PLEC:NM_000445:exon32:c.G5365A:p.A1789T	exonic	ENSG00000178209	.	nonsynonymous SNV	ENSG00000178209:ENST00000322810:exon31:c.G5695A:p.A1899T,ENSG00000178209:ENST00000345136:exon31:c.G5284A:p.A1762T,ENSG00000178209:ENST00000354589:exon31:c.G5284A:p.A1762T,ENSG00000178209:ENST00000354958:exon31:c.G5218A:p.A1740T,ENSG00000178209:ENST00000356346:exon31:c.G5242A:p.A1748T,ENSG00000178209:ENST00000357649:exon31:c.G5296A:p.A1766T,ENSG00000178209:ENST00000398774:exon31:c.G5188A:p.A1730T,…	.	Uncertain significance	not_specified	RCV000342381.2	MedGen	CN169374
8	144998849	144998849	G	A	exonic	PLEC	.	nonsynonymous SNV	PLEC:NM_201378:exon31:c.C5206T:p.R1736W,PLEC:NM_201379:exon31:c.C5182T:p.R1728W,PLEC:NM_201380:exon31:c.C5659T:p.R1887W,PLEC:NM_201381:exon31:c.C5152T:p.R1718W,PLEC:NM_201382:exon31:c.C5248T:p.R1750W,PLEC:NM_201383:exon31:c.C5260T:p.R1754W,PLEC:NM_201384:exon31:c.C5248T:p.R1750W,PLEC:NM_000445:exon32:c.C5329T:p.R1777W	exonic	ENSG00000178209	.	nonsynonymous SNV	ENSG00000178209:ENST00000322810:exon31:c.C5659T:p.R1887W,ENSG00000178209:ENST00000345136:exon31:c.C5248T:p.R1750W,ENSG00000178209:ENST00000354589:exon31:c.C5248T:p.R1750W,ENSG00000178209:ENST00000354958:exon31:c.C5182T:p.R1728W,ENSG00000178209:ENST00000356346:exon31:c.C5206T:p.R1736W,ENSG00000178209:ENST00000357649:exon31:c.C5260T:p.R1754W,ENSG00000178209:ENST00000398774:exon31:c.C5152T:p.R1718W,…	rs782410213	Uncertain significance	not_specified	RCV000334421.1	MedGen	CN169374
8	144998870	144998870	C	T	exonic	PLEC	.	nonsynonymous SNV	PLEC:NM_201378:exon31:c.G5185A:p.A1729T,PLEC:NM_201379:exon31:c.G5161A:p.A1721T,PLEC:NM_201380:exon31:c.G5638A:p.A1880T,PLEC:NM_201381:exon31:c.G5131A:p.A1711T,PLEC:NM_201382:exon31:c.G5227A:p.A1743T,PLEC:NM_201383:exon31:c.G5239A:p.A1747T,PLEC:NM_201384:exon31:c.G5227A:p.A1743T,PLEC:NM_000445:exon32:c.G5308A:p.A1770T	exonic	ENSG00000178209	.	nonsynonymous SNV	ENSG00000178209:ENST00000322810:exon31:c.G5638A:p.A1880T,ENSG00000178209:ENST00000345136:exon31:c.G5227A:p.A1743T,ENSG00000178209:ENST00000354589:exon31:c.G5227A:p.A1743T,ENSG00000178209:ENST00000354958:exon31:c.G5161A:p.A1721T,ENSG00000178209:ENST00000356346:exon31:c.G5185A:p.A1729T,ENSG00000178209:ENST00000357649:exon31:c.G5239A:p.A1747T,ENSG00000178209:ENST00000398774:exon31:c.G5131A:p.A1711T,…	rs781946435	Uncertain significance	not_specified	RCV000273380.2	MedGen	CN169374
8	144998884	144998884	C	T	exonic	PLEC	.	nonsynonymous SNV	PLEC:NM_201378:exon31:c.G5171A:p.R1724Q,PLEC:NM_201379:exon31:c.G5147A:p.R1716Q,PLEC:NM_201380:exon31:c.G5624A:p.R1875Q,PLEC:NM_201381:exon31:c.G5117A:p.R1706Q,PLEC:NM_201382:exon31:c.G5213A:p.R1738Q,PLEC:NM_201383:exon31:c.G5225A:p.R1742Q,PLEC:NM_201384:exon31:c.G5213A:p.R1738Q,PLEC:NM_000445:exon32:c.G5294A:p.R1765Q	exonic	ENSG00000178209	.	nonsynonymous SNV	ENSG00000178209:ENST00000322810:exon31:c.G5624A:p.R1875Q,ENSG00000178209:ENST00000345136:exon31:c.G5213A:p.R1738Q,ENSG00000178209:ENST00000354589:exon31:c.G5213A:p.R1738Q,ENSG00000178209:ENST00000354958:exon31:c.G5147A:p.R1716Q,ENSG00000178209:ENST00000356346:exon31:c.G5171A:p.R1724Q,ENSG00000178209:ENST00000357649:exon31:c.G5225A:p.R1742Q,ENSG00000178209:ENST00000398774:exon31:c.G5117A:p.R1706Q,…	rs577419493	Uncertain significance	not_specified	RCV000334182.1	MedGen	CN169374
8	144998932	144998932	G	A	exonic	PLEC	.	nonsynonymous SNV	PLEC:NM_201378:exon31:c.C5123T:p.T1708M,PLEC:NM_201379:exon31:c.C5099T:p.T1700M,PLEC:NM_201380:exon31:c.C5576T:p.T1859M,PLEC:NM_201381:exon31:c.C5069T:p.T1690M,PLEC:NM_201382:exon31:c.C5165T:p.T1722M,PLEC:NM_201383:exon31:c.C5177T:p.T1726M,PLEC:NM_201384:exon31:c.C5165T:p.T1722M,PLEC:NM_000445:exon32:c.C5246T:p.T1749M	exonic	ENSG00000178209	.	nonsynonymous SNV	ENSG00000178209:ENST00000322810:exon31:c.C5576T:p.T1859M,ENSG00000178209:ENST00000345136:exon31:c.C5165T:p.T1722M,ENSG00000178209:ENST00000354589:exon31:c.C5165T:p.T1722M,ENSG00000178209:ENST00000354958:exon31:c.C5099T:p.T1700M,ENSG00000178209:ENST00000356346:exon31:c.C5123T:p.T1708M,ENSG00000178209:ENST00000357649:exon31:c.C5177T:p.T1726M,ENSG00000178209:ENST00000398774:exon31:c.C5069T:p.T1690M,…	rs377665141	other	not_specified	RCV000078874.5	MedGen	CN169374
8	144998947	144998947	C	T	exonic	PLEC	.	nonsynonymous SNV	PLEC:NM_201378:exon31:c.G5108A:p.R1703Q,PLEC:NM_201379:exon31:c.G5084A:p.R1695Q,PLEC:NM_201380:exon31:c.G5561A:p.R1854Q,PLEC:NM_201381:exon31:c.G5054A:p.R1685Q,PLEC:NM_201382:exon31:c.G5150A:p.R1717Q,PLEC:NM_201383:exon31:c.G5162A:p.R1721Q,PLEC:NM_201384:exon31:c.G5150A:p.R1717Q,PLEC:NM_000445:exon32:c.G5231A:p.R1744Q	exonic	ENSG00000178209	.	nonsynonymous SNV	ENSG00000178209:ENST00000322810:exon31:c.G5561A:p.R1854Q,ENSG00000178209:ENST00000345136:exon31:c.G5150A:p.R1717Q,ENSG00000178209:ENST00000354589:exon31:c.G5150A:p.R1717Q,ENSG00000178209:ENST00000354958:exon31:c.G5084A:p.R1695Q,ENSG00000178209:ENST00000356346:exon31:c.G5108A:p.R1703Q,ENSG00000178209:ENST00000357649:exon31:c.G5162A:p.R1721Q,ENSG00000178209:ENST00000398774:exon31:c.G5054A:p.R1685Q,…	rs150384680	Uncertain significance	not_specified	RCV000294611.1	MedGen	CN169374
8	144999044	144999044	G	A	exonic	PLEC	.	nonsynonymous SNV	PLEC:NM_201378:exon31:c.C5011T:p.R1671W,PLEC:NM_201379:exon31:c.C4987T:p.R1663W,PLEC:NM_201380:exon31:c.C5464T:p.R1822W,PLEC:NM_201381:exon31:c.C4957T:p.R1653W,PLEC:NM_201382:exon31:c.C5053T:p.R1685W,PLEC:NM_201383:exon31:c.C5065T:p.R1689W,PLEC:NM_201384:exon31:c.C5053T:p.R1685W,PLEC:NM_000445:exon32:c.C5134T:p.R1712W	exonic	ENSG00000178209	.	nonsynonymous SNV	ENSG00000178209:ENST00000322810:exon31:c.C5464T:p.R1822W,ENSG00000178209:ENST00000345136:exon31:c.C5053T:p.R1685W,ENSG00000178209:ENST00000354589:exon31:c.C5053T:p.R1685W,ENSG00000178209:ENST00000354958:exon31:c.C4987T:p.R1663W,ENSG00000178209:ENST00000356346:exon31:c.C5011T:p.R1671W,ENSG00000178209:ENST00000357649:exon31:c.C5065T:p.R1689W,ENSG00000178209:ENST00000398774:exon31:c.C4957T:p.R1653W,…	rs781802082	Uncertain significance	not_specified	RCV000193340.2	MedGen	CN169374
8	144999068	144999068	C	T	exonic	PLEC	.	nonsynonymous SNV	PLEC:NM_201378:exon31:c.G4987A:p.G1663S,PLEC:NM_201379:exon31:c.G4963A:p.G1655S,PLEC:NM_201380:exon31:c.G5440A:p.G1814S,PLEC:NM_201381:exon31:c.G4933A:p.G1645S,PLEC:NM_201382:exon31:c.G5029A:p.G1677S,PLEC:NM_201383:exon31:c.G5041A:p.G1681S,PLEC:NM_201384:exon31:c.G5029A:p.G1677S,PLEC:NM_000445:exon32:c.G5110A:p.G1704S	exonic	ENSG00000178209	.	nonsynonymous SNV	ENSG00000178209:ENST00000322810:exon31:c.G5440A:p.G1814S,ENSG00000178209:ENST00000345136:exon31:c.G5029A:p.G1677S,ENSG00000178209:ENST00000354589:exon31:c.G5029A:p.G1677S,ENSG00000178209:ENST00000354958:exon31:c.G4963A:p.G1655S,ENSG00000178209:ENST00000356346:exon31:c.G4987A:p.G1663S,ENSG00000178209:ENST00000357649:exon31:c.G5041A:p.G1681S,ENSG00000178209:ENST00000398774:exon31:c.G4933A:p.G1645S,…	rs373952777	Uncertain significance|Likely benign	not_provided|not_specified	RCV000415816.1|RCV000430305.1	MedGen|MedGen	CN221809|CN169374
8	144999073	144999073	C	T	exonic	PLEC	.	nonsynonymous SNV	PLEC:NM_201378:exon31:c.G4982A:p.R1661Q,PLEC:NM_201379:exon31:c.G4958A:p.R1653Q,PLEC:NM_201380:exon31:c.G5435A:p.R1812Q,PLEC:NM_201381:exon31:c.G4928A:p.R1643Q,PLEC:NM_201382:exon31:c.G5024A:p.R1675Q,PLEC:NM_201383:exon31:c.G5036A:p.R1679Q,PLEC:NM_201384:exon31:c.G5024A:p.R1675Q,PLEC:NM_000445:exon32:c.G5105A:p.R1702Q	exonic	ENSG00000178209	.	nonsynonymous SNV	ENSG00000178209:ENST00000322810:exon31:c.G5435A:p.R1812Q,ENSG00000178209:ENST00000345136:exon31:c.G5024A:p.R1675Q,ENSG00000178209:ENST00000354589:exon31:c.G5024A:p.R1675Q,ENSG00000178209:ENST00000354958:exon31:c.G4958A:p.R1653Q,ENSG00000178209:ENST00000356346:exon31:c.G4982A:p.R1661Q,ENSG00000178209:ENST00000357649:exon31:c.G5036A:p.R1679Q,ENSG00000178209:ENST00000398774:exon31:c.G4928A:p.R1643Q,…	rs370569372	Uncertain significance	not_specified	RCV000177612.2	MedGen	CN169374
8	144999085	144999085	C	T	exonic	PLEC	.	nonsynonymous SNV	PLEC:NM_201378:exon31:c.G4970A:p.R1657H,PLEC:NM_201379:exon31:c.G4946A:p.R1649H,PLEC:NM_201380:exon31:c.G5423A:p.R1808H,PLEC:NM_201381:exon31:c.G4916A:p.R1639H,PLEC:NM_201382:exon31:c.G5012A:p.R1671H,PLEC:NM_201383:exon31:c.G5024A:p.R1675H,PLEC:NM_201384:exon31:c.G5012A:p.R1671H,PLEC:NM_000445:exon32:c.G5093A:p.R1698H	exonic	ENSG00000178209	.	nonsynonymous SNV	ENSG00000178209:ENST00000322810:exon31:c.G5423A:p.R1808H,ENSG00000178209:ENST00000345136:exon31:c.G5012A:p.R1671H,ENSG00000178209:ENST00000354589:exon31:c.G5012A:p.R1671H,ENSG00000178209:ENST00000354958:exon31:c.G4946A:p.R1649H,ENSG00000178209:ENST00000356346:exon31:c.G4970A:p.R1657H,ENSG00000178209:ENST00000357649:exon31:c.G5024A:p.R1675H,ENSG00000178209:ENST00000398774:exon31:c.G4916A:p.R1639H,…	rs782081177	Uncertain significance	not_specified	RCV000485267.1	MedGen	CN169374
8	144999094	144999094	T	G	exonic	PLEC	.	nonsynonymous SNV	PLEC:NM_201378:exon31:c.A4961C:p.E1654A,PLEC:NM_201379:exon31:c.A4937C:p.E1646A,PLEC:NM_201380:exon31:c.A5414C:p.E1805A,PLEC:NM_201381:exon31:c.A4907C:p.E1636A,PLEC:NM_201382:exon31:c.A5003C:p.E1668A,PLEC:NM_201383:exon31:c.A5015C:p.E1672A,PLEC:NM_201384:exon31:c.A5003C:p.E1668A,PLEC:NM_000445:exon32:c.A5084C:p.E1695A	exonic	ENSG00000178209	.	nonsynonymous SNV	ENSG00000178209:ENST00000322810:exon31:c.A5414C:p.E1805A,ENSG00000178209:ENST00000345136:exon31:c.A5003C:p.E1668A,ENSG00000178209:ENST00000354589:exon31:c.A5003C:p.E1668A,ENSG00000178209:ENST00000354958:exon31:c.A4937C:p.E1646A,ENSG00000178209:ENST00000356346:exon31:c.A4961C:p.E1654A,ENSG00000178209:ENST00000357649:exon31:c.A5015C:p.E1672A,ENSG00000178209:ENST00000398774:exon31:c.A4907C:p.E1636A,…	rs782670264	Uncertain significance	not_specified	RCV000286371.1	MedGen	CN169374
8	144999119	144999119	C	T	exonic	PLEC	.	nonsynonymous SNV	PLEC:NM_201378:exon31:c.G4936A:p.A1646T,PLEC:NM_201379:exon31:c.G4912A:p.A1638T,PLEC:NM_201380:exon31:c.G5389A:p.A1797T,PLEC:NM_201381:exon31:c.G4882A:p.A1628T,PLEC:NM_201382:exon31:c.G4978A:p.A1660T,PLEC:NM_201383:exon31:c.G4990A:p.A1664T,PLEC:NM_201384:exon31:c.G4978A:p.A1660T,PLEC:NM_000445:exon32:c.G5059A:p.A1687T	exonic	ENSG00000178209	.	nonsynonymous SNV	ENSG00000178209:ENST00000322810:exon31:c.G5389A:p.A1797T,ENSG00000178209:ENST00000345136:exon31:c.G4978A:p.A1660T,ENSG00000178209:ENST00000354589:exon31:c.G4978A:p.A1660T,ENSG00000178209:ENST00000354958:exon31:c.G4912A:p.A1638T,ENSG00000178209:ENST00000356346:exon31:c.G4936A:p.A1646T,ENSG00000178209:ENST00000357649:exon31:c.G4990A:p.A1664T,ENSG00000178209:ENST00000398774:exon31:c.G4882A:p.A1628T,…	rs781997708	Likely benign	not_specified	RCV000419056.1	MedGen	CN169374
8	144999154	144999154	G	A	exonic	PLEC	.	nonsynonymous SNV	PLEC:NM_201378:exon31:c.C4901T:p.A1634V,PLEC:NM_201379:exon31:c.C4877T:p.A1626V,PLEC:NM_201380:exon31:c.C5354T:p.A1785V,PLEC:NM_201381:exon31:c.C4847T:p.A1616V,PLEC:NM_201382:exon31:c.C4943T:p.A1648V,PLEC:NM_201383:exon31:c.C4955T:p.A1652V,PLEC:NM_201384:exon31:c.C4943T:p.A1648V,PLEC:NM_000445:exon32:c.C5024T:p.A1675V	exonic	ENSG00000178209	.	nonsynonymous SNV	ENSG00000178209:ENST00000322810:exon31:c.C5354T:p.A1785V,ENSG00000178209:ENST00000345136:exon31:c.C4943T:p.A1648V,ENSG00000178209:ENST00000354589:exon31:c.C4943T:p.A1648V,ENSG00000178209:ENST00000354958:exon31:c.C4877T:p.A1626V,ENSG00000178209:ENST00000356346:exon31:c.C4901T:p.A1634V,ENSG00000178209:ENST00000357649:exon31:c.C4955T:p.A1652V,ENSG00000178209:ENST00000398774:exon31:c.C4847T:p.A1616V,…	.	Uncertain significance	not_specified	RCV000289357.2	MedGen	CN169374
8	144999224	144999224	C	T	exonic	PLEC	.	nonsynonymous SNV	PLEC:NM_201378:exon31:c.G4831A:p.E1611K,PLEC:NM_201379:exon31:c.G4807A:p.E1603K,PLEC:NM_201380:exon31:c.G5284A:p.E1762K,PLEC:NM_201381:exon31:c.G4777A:p.E1593K,PLEC:NM_201382:exon31:c.G4873A:p.E1625K,PLEC:NM_201383:exon31:c.G4885A:p.E1629K,PLEC:NM_201384:exon31:c.G4873A:p.E1625K,PLEC:NM_000445:exon32:c.G4954A:p.E1652K	exonic	ENSG00000178209	.	nonsynonymous SNV	ENSG00000178209:ENST00000322810:exon31:c.G5284A:p.E1762K,ENSG00000178209:ENST00000345136:exon31:c.G4873A:p.E1625K,ENSG00000178209:ENST00000354589:exon31:c.G4873A:p.E1625K,ENSG00000178209:ENST00000354958:exon31:c.G4807A:p.E1603K,ENSG00000178209:ENST00000356346:exon31:c.G4831A:p.E1611K,ENSG00000178209:ENST00000357649:exon31:c.G4885A:p.E1629K,ENSG00000178209:ENST00000398774:exon31:c.G4777A:p.E1593K,…	rs187338487	other	not_specified	RCV000403364.2	MedGen	CN169374
8	144999242	144999242	C	T	exonic	PLEC	.	nonsynonymous SNV	PLEC:NM_201378:exon31:c.G4813A:p.E1605K,PLEC:NM_201379:exon31:c.G4789A:p.E1597K,PLEC:NM_201380:exon31:c.G5266A:p.E1756K,PLEC:NM_201381:exon31:c.G4759A:p.E1587K,PLEC:NM_201382:exon31:c.G4855A:p.E1619K,PLEC:NM_201383:exon31:c.G4867A:p.E1623K,PLEC:NM_201384:exon31:c.G4855A:p.E1619K,PLEC:NM_000445:exon32:c.G4936A:p.E1646K	exonic	ENSG00000178209	.	nonsynonymous SNV	ENSG00000178209:ENST00000322810:exon31:c.G5266A:p.E1756K,ENSG00000178209:ENST00000345136:exon31:c.G4855A:p.E1619K,ENSG00000178209:ENST00000354589:exon31:c.G4855A:p.E1619K,ENSG00000178209:ENST00000354958:exon31:c.G4789A:p.E1597K,ENSG00000178209:ENST00000356346:exon31:c.G4813A:p.E1605K,ENSG00000178209:ENST00000357649:exon31:c.G4867A:p.E1623K,ENSG00000178209:ENST00000398774:exon31:c.G4759A:p.E1587K,…	rs782026068	Uncertain significance	not_specified	RCV000321459.1	MedGen	CN169374
8	144999263	144999263	G	A	exonic	PLEC	.	nonsynonymous SNV	PLEC:NM_201378:exon31:c.C4792T:p.R1598W,PLEC:NM_201379:exon31:c.C4768T:p.R1590W,PLEC:NM_201380:exon31:c.C5245T:p.R1749W,PLEC:NM_201381:exon31:c.C4738T:p.R1580W,PLEC:NM_201382:exon31:c.C4834T:p.R1612W,PLEC:NM_201383:exon31:c.C4846T:p.R1616W,PLEC:NM_201384:exon31:c.C4834T:p.R1612W,PLEC:NM_000445:exon32:c.C4915T:p.R1639W	exonic	ENSG00000178209	.	nonsynonymous SNV	ENSG00000178209:ENST00000322810:exon31:c.C5245T:p.R1749W,ENSG00000178209:ENST00000345136:exon31:c.C4834T:p.R1612W,ENSG00000178209:ENST00000354589:exon31:c.C4834T:p.R1612W,ENSG00000178209:ENST00000354958:exon31:c.C4768T:p.R1590W,ENSG00000178209:ENST00000356346:exon31:c.C4792T:p.R1598W,ENSG00000178209:ENST00000357649:exon31:c.C4846T:p.R1616W,ENSG00000178209:ENST00000398774:exon31:c.C4738T:p.R1580W,…	rs782551115	Uncertain significance	not_specified	RCV000392926.1	MedGen	CN169374
8	144999352	144999352	C	T	exonic	PLEC	.	nonsynonymous SNV	PLEC:NM_201378:exon31:c.G4703A:p.R1568H,PLEC:NM_201379:exon31:c.G4679A:p.R1560H,PLEC:NM_201380:exon31:c.G5156A:p.R1719H,PLEC:NM_201381:exon31:c.G4649A:p.R1550H,PLEC:NM_201382:exon31:c.G4745A:p.R1582H,PLEC:NM_201383:exon31:c.G4757A:p.R1586H,PLEC:NM_201384:exon31:c.G4745A:p.R1582H,PLEC:NM_000445:exon32:c.G4826A:p.R1609H	exonic	ENSG00000178209	.	nonsynonymous SNV	ENSG00000178209:ENST00000322810:exon31:c.G5156A:p.R1719H,ENSG00000178209:ENST00000345136:exon31:c.G4745A:p.R1582H,ENSG00000178209:ENST00000354589:exon31:c.G4745A:p.R1582H,ENSG00000178209:ENST00000354958:exon31:c.G4679A:p.R1560H,ENSG00000178209:ENST00000356346:exon31:c.G4703A:p.R1568H,ENSG00000178209:ENST00000357649:exon31:c.G4757A:p.R1586H,ENSG00000178209:ENST00000398774:exon31:c.G4649A:p.R1550H,…	rs781876093	Uncertain significance	not_specified	RCV000315925.2	MedGen	CN169374
8	144999353	144999353	G	A	exonic	PLEC	.	nonsynonymous SNV	PLEC:NM_201378:exon31:c.C4702T:p.R1568C,PLEC:NM_201379:exon31:c.C4678T:p.R1560C,PLEC:NM_201380:exon31:c.C5155T:p.R1719C,PLEC:NM_201381:exon31:c.C4648T:p.R1550C,PLEC:NM_201382:exon31:c.C4744T:p.R1582C,PLEC:NM_201383:exon31:c.C4756T:p.R1586C,PLEC:NM_201384:exon31:c.C4744T:p.R1582C,PLEC:NM_000445:exon32:c.C4825T:p.R1609C	exonic	ENSG00000178209	.	nonsynonymous SNV	ENSG00000178209:ENST00000322810:exon31:c.C5155T:p.R1719C,ENSG00000178209:ENST00000345136:exon31:c.C4744T:p.R1582C,ENSG00000178209:ENST00000354589:exon31:c.C4744T:p.R1582C,ENSG00000178209:ENST00000354958:exon31:c.C4678T:p.R1560C,ENSG00000178209:ENST00000356346:exon31:c.C4702T:p.R1568C,ENSG00000178209:ENST00000357649:exon31:c.C4756T:p.R1586C,ENSG00000178209:ENST00000398774:exon31:c.C4648T:p.R1550C,…	rs782517203	Uncertain significance	not_specified	RCV000434631.1	MedGen	CN169374
8	144999362	144999362	G	T	exonic	PLEC	.	nonsynonymous SNV	PLEC:NM_201378:exon31:c.C4693A:p.Q1565K,PLEC:NM_201379:exon31:c.C4669A:p.Q1557K,PLEC:NM_201380:exon31:c.C5146A:p.Q1716K,PLEC:NM_201381:exon31:c.C4639A:p.Q1547K,PLEC:NM_201382:exon31:c.C4735A:p.Q1579K,PLEC:NM_201383:exon31:c.C4747A:p.Q1583K,PLEC:NM_201384:exon31:c.C4735A:p.Q1579K,PLEC:NM_000445:exon32:c.C4816A:p.Q1606K	exonic	ENSG00000178209	.	nonsynonymous SNV	ENSG00000178209:ENST00000322810:exon31:c.C5146A:p.Q1716K,ENSG00000178209:ENST00000345136:exon31:c.C4735A:p.Q1579K,ENSG00000178209:ENST00000354589:exon31:c.C4735A:p.Q1579K,ENSG00000178209:ENST00000354958:exon31:c.C4669A:p.Q1557K,ENSG00000178209:ENST00000356346:exon31:c.C4693A:p.Q1565K,ENSG00000178209:ENST00000357649:exon31:c.C4747A:p.Q1583K,ENSG00000178209:ENST00000398774:exon31:c.C4639A:p.Q1547K,…	rs782612282	Uncertain significance	not_specified	RCV000374948.1	MedGen	CN169374
8	144999415	144999415	C	T	exonic	PLEC	.	nonsynonymous SNV	PLEC:NM_201378:exon31:c.G4640A:p.R1547Q,PLEC:NM_201379:exon31:c.G4616A:p.R1539Q,PLEC:NM_201380:exon31:c.G5093A:p.R1698Q,PLEC:NM_201381:exon31:c.G4586A:p.R1529Q,PLEC:NM_201382:exon31:c.G4682A:p.R1561Q,PLEC:NM_201383:exon31:c.G4694A:p.R1565Q,PLEC:NM_201384:exon31:c.G4682A:p.R1561Q,PLEC:NM_000445:exon32:c.G4763A:p.R1588Q	exonic	ENSG00000178209	.	nonsynonymous SNV	ENSG00000178209:ENST00000322810:exon31:c.G5093A:p.R1698Q,ENSG00000178209:ENST00000345136:exon31:c.G4682A:p.R1561Q,ENSG00000178209:ENST00000354589:exon31:c.G4682A:p.R1561Q,ENSG00000178209:ENST00000354958:exon31:c.G4616A:p.R1539Q,ENSG00000178209:ENST00000356346:exon31:c.G4640A:p.R1547Q,ENSG00000178209:ENST00000357649:exon31:c.G4694A:p.R1565Q,ENSG00000178209:ENST00000398774:exon31:c.G4586A:p.R1529Q,…	rs376840697	Uncertain significance	not_specified	RCV000368938.1	MedGen	CN169374
8	144999446	144999446	G	A	exonic	PLEC	.	nonsynonymous SNV	PLEC:NM_201378:exon31:c.C4609T:p.R1537C,PLEC:NM_201379:exon31:c.C4585T:p.R1529C,PLEC:NM_201380:exon31:c.C5062T:p.R1688C,PLEC:NM_201381:exon31:c.C4555T:p.R1519C,PLEC:NM_201382:exon31:c.C4651T:p.R1551C,PLEC:NM_201383:exon31:c.C4663T:p.R1555C,PLEC:NM_201384:exon31:c.C4651T:p.R1551C,PLEC:NM_000445:exon32:c.C4732T:p.R1578C	exonic	ENSG00000178209	.	nonsynonymous SNV	ENSG00000178209:ENST00000322810:exon31:c.C5062T:p.R1688C,ENSG00000178209:ENST00000345136:exon31:c.C4651T:p.R1551C,ENSG00000178209:ENST00000354589:exon31:c.C4651T:p.R1551C,ENSG00000178209:ENST00000354958:exon31:c.C4585T:p.R1529C,ENSG00000178209:ENST00000356346:exon31:c.C4609T:p.R1537C,ENSG00000178209:ENST00000357649:exon31:c.C4663T:p.R1555C,ENSG00000178209:ENST00000398774:exon31:c.C4555T:p.R1519C,…	rs2857824	Likely benign	not_specified	RCV000177579.4	MedGen	CN169374
8	144999499	144999499	C	T	exonic	PLEC	.	nonsynonymous SNV	PLEC:NM_201378:exon31:c.G4556A:p.R1519Q,PLEC:NM_201379:exon31:c.G4532A:p.R1511Q,PLEC:NM_201380:exon31:c.G5009A:p.R1670Q,PLEC:NM_201381:exon31:c.G4502A:p.R1501Q,PLEC:NM_201382:exon31:c.G4598A:p.R1533Q,PLEC:NM_201383:exon31:c.G4610A:p.R1537Q,PLEC:NM_201384:exon31:c.G4598A:p.R1533Q,PLEC:NM_000445:exon32:c.G4679A:p.R1560Q	exonic	ENSG00000178209	.	nonsynonymous SNV	ENSG00000178209:ENST00000322810:exon31:c.G5009A:p.R1670Q,ENSG00000178209:ENST00000345136:exon31:c.G4598A:p.R1533Q,ENSG00000178209:ENST00000354589:exon31:c.G4598A:p.R1533Q,ENSG00000178209:ENST00000354958:exon31:c.G4532A:p.R1511Q,ENSG00000178209:ENST00000356346:exon31:c.G4556A:p.R1519Q,ENSG00000178209:ENST00000357649:exon31:c.G4610A:p.R1537Q,ENSG00000178209:ENST00000398774:exon31:c.G4502A:p.R1501Q,…	rs201430180	other|Uncertain significance	not_specified|not_provided	RCV000153739.6|RCV000488034.1	MedGen|MedGen	CN169374|CN221809
8	144999511	144999511	C	T	exonic	PLEC	.	nonsynonymous SNV	PLEC:NM_201378:exon31:c.G4544A:p.R1515H,PLEC:NM_201379:exon31:c.G4520A:p.R1507H,PLEC:NM_201380:exon31:c.G4997A:p.R1666H,PLEC:NM_201381:exon31:c.G4490A:p.R1497H,PLEC:NM_201382:exon31:c.G4586A:p.R1529H,PLEC:NM_201383:exon31:c.G4598A:p.R1533H,PLEC:NM_201384:exon31:c.G4586A:p.R1529H,PLEC:NM_000445:exon32:c.G4667A:p.R1556H	exonic	ENSG00000178209	.	nonsynonymous SNV	ENSG00000178209:ENST00000322810:exon31:c.G4997A:p.R1666H,ENSG00000178209:ENST00000345136:exon31:c.G4586A:p.R1529H,ENSG00000178209:ENST00000354589:exon31:c.G4586A:p.R1529H,ENSG00000178209:ENST00000354958:exon31:c.G4520A:p.R1507H,ENSG00000178209:ENST00000356346:exon31:c.G4544A:p.R1515H,ENSG00000178209:ENST00000357649:exon31:c.G4598A:p.R1533H,ENSG00000178209:ENST00000398774:exon31:c.G4490A:p.R1497H,…	.	Likely benign	not_specified	RCV000436465.1	MedGen	CN169374
8	144999536	144999536	C	T	exonic	PLEC	.	nonsynonymous SNV	PLEC:NM_201378:exon31:c.G4519A:p.V1507M,PLEC:NM_201379:exon31:c.G4495A:p.V1499M,PLEC:NM_201380:exon31:c.G4972A:p.V1658M,PLEC:NM_201381:exon31:c.G4465A:p.V1489M,PLEC:NM_201382:exon31:c.G4561A:p.V1521M,PLEC:NM_201383:exon31:c.G4573A:p.V1525M,PLEC:NM_201384:exon31:c.G4561A:p.V1521M,PLEC:NM_000445:exon32:c.G4642A:p.V1548M	exonic	ENSG00000178209	.	nonsynonymous SNV	ENSG00000178209:ENST00000322810:exon31:c.G4972A:p.V1658M,ENSG00000178209:ENST00000345136:exon31:c.G4561A:p.V1521M,ENSG00000178209:ENST00000354589:exon31:c.G4561A:p.V1521M,ENSG00000178209:ENST00000354958:exon31:c.G4495A:p.V1499M,ENSG00000178209:ENST00000356346:exon31:c.G4519A:p.V1507M,ENSG00000178209:ENST00000357649:exon31:c.G4573A:p.V1525M,ENSG00000178209:ENST00000398774:exon31:c.G4465A:p.V1489M,…	rs782046910	Uncertain significance	not_specified	RCV000262777.2	MedGen	CN169374
8	144999541	144999541	G	A	exonic	PLEC	.	nonsynonymous SNV	PLEC:NM_201378:exon31:c.C4514T:p.S1505L,PLEC:NM_201379:exon31:c.C4490T:p.S1497L,PLEC:NM_201380:exon31:c.C4967T:p.S1656L,PLEC:NM_201381:exon31:c.C4460T:p.S1487L,PLEC:NM_201382:exon31:c.C4556T:p.S1519L,PLEC:NM_201383:exon31:c.C4568T:p.S1523L,PLEC:NM_201384:exon31:c.C4556T:p.S1519L,PLEC:NM_000445:exon32:c.C4637T:p.S1546L	exonic	ENSG00000178209	.	nonsynonymous SNV	ENSG00000178209:ENST00000322810:exon31:c.C4967T:p.S1656L,ENSG00000178209:ENST00000345136:exon31:c.C4556T:p.S1519L,ENSG00000178209:ENST00000354589:exon31:c.C4556T:p.S1519L,ENSG00000178209:ENST00000354958:exon31:c.C4490T:p.S1497L,ENSG00000178209:ENST00000356346:exon31:c.C4514T:p.S1505L,ENSG00000178209:ENST00000357649:exon31:c.C4568T:p.S1523L,ENSG00000178209:ENST00000398774:exon31:c.C4460T:p.S1487L,…	rs182120395	other	not_specified	RCV000078868.6	MedGen	CN169374
8	144999571	144999571	C	T	exonic	PLEC	.	nonsynonymous SNV	PLEC:NM_201378:exon31:c.G4484A:p.R1495H,PLEC:NM_201379:exon31:c.G4460A:p.R1487H,PLEC:NM_201380:exon31:c.G4937A:p.R1646H,PLEC:NM_201381:exon31:c.G4430A:p.R1477H,PLEC:NM_201382:exon31:c.G4526A:p.R1509H,PLEC:NM_201383:exon31:c.G4538A:p.R1513H,PLEC:NM_201384:exon31:c.G4526A:p.R1509H,PLEC:NM_000445:exon32:c.G4607A:p.R1536H	exonic	ENSG00000178209	.	nonsynonymous SNV	ENSG00000178209:ENST00000322810:exon31:c.G4937A:p.R1646H,ENSG00000178209:ENST00000345136:exon31:c.G4526A:p.R1509H,ENSG00000178209:ENST00000354589:exon31:c.G4526A:p.R1509H,ENSG00000178209:ENST00000354958:exon31:c.G4460A:p.R1487H,ENSG00000178209:ENST00000356346:exon31:c.G4484A:p.R1495H,ENSG00000178209:ENST00000357649:exon31:c.G4538A:p.R1513H,ENSG00000178209:ENST00000398774:exon31:c.G4430A:p.R1477H,…	rs782666455	Uncertain significance	not_specified	RCV000177626.1	MedGen	CN169374
8	144999572	144999572	G	A	exonic	PLEC	.	nonsynonymous SNV	PLEC:NM_201378:exon31:c.C4483T:p.R1495C,PLEC:NM_201379:exon31:c.C4459T:p.R1487C,PLEC:NM_201380:exon31:c.C4936T:p.R1646C,PLEC:NM_201381:exon31:c.C4429T:p.R1477C,PLEC:NM_201382:exon31:c.C4525T:p.R1509C,PLEC:NM_201383:exon31:c.C4537T:p.R1513C,PLEC:NM_201384:exon31:c.C4525T:p.R1509C,PLEC:NM_000445:exon32:c.C4606T:p.R1536C	exonic	ENSG00000178209	.	nonsynonymous SNV	ENSG00000178209:ENST00000322810:exon31:c.C4936T:p.R1646C,ENSG00000178209:ENST00000345136:exon31:c.C4525T:p.R1509C,ENSG00000178209:ENST00000354589:exon31:c.C4525T:p.R1509C,ENSG00000178209:ENST00000354958:exon31:c.C4459T:p.R1487C,ENSG00000178209:ENST00000356346:exon31:c.C4483T:p.R1495C,ENSG00000178209:ENST00000357649:exon31:c.C4537T:p.R1513C,ENSG00000178209:ENST00000398774:exon31:c.C4429T:p.R1477C,…	rs868970949	Uncertain significance	not_specified	RCV000342601.1	MedGen	CN169374
8	144999628	144999628	C	T	exonic	PLEC	.	nonsynonymous SNV	PLEC:NM_201378:exon31:c.G4427A:p.R1476Q,PLEC:NM_201379:exon31:c.G4403A:p.R1468Q,PLEC:NM_201380:exon31:c.G4880A:p.R1627Q,PLEC:NM_201381:exon31:c.G4373A:p.R1458Q,PLEC:NM_201382:exon31:c.G4469A:p.R1490Q,PLEC:NM_201383:exon31:c.G4481A:p.R1494Q,PLEC:NM_201384:exon31:c.G4469A:p.R1490Q,PLEC:NM_000445:exon32:c.G4550A:p.R1517Q	exonic	ENSG00000178209	.	nonsynonymous SNV	ENSG00000178209:ENST00000322810:exon31:c.G4880A:p.R1627Q,ENSG00000178209:ENST00000345136:exon31:c.G4469A:p.R1490Q,ENSG00000178209:ENST00000354589:exon31:c.G4469A:p.R1490Q,ENSG00000178209:ENST00000354958:exon31:c.G4403A:p.R1468Q,ENSG00000178209:ENST00000356346:exon31:c.G4427A:p.R1476Q,ENSG00000178209:ENST00000357649:exon31:c.G4481A:p.R1494Q,ENSG00000178209:ENST00000398774:exon31:c.G4373A:p.R1458Q,…	rs371290504	Uncertain significance	not_specified	RCV000364557.2	MedGen	CN169374
8	144999701	144999701	G	A	exonic	PLEC	.	nonsynonymous SNV	PLEC:NM_201378:exon31:c.C4354T:p.R1452C,PLEC:NM_201379:exon31:c.C4330T:p.R1444C,PLEC:NM_201380:exon31:c.C4807T:p.R1603C,PLEC:NM_201381:exon31:c.C4300T:p.R1434C,PLEC:NM_201382:exon31:c.C4396T:p.R1466C,PLEC:NM_201383:exon31:c.C4408T:p.R1470C,PLEC:NM_201384:exon31:c.C4396T:p.R1466C,PLEC:NM_000445:exon32:c.C4477T:p.R1493C	exonic	ENSG00000178209	.	nonsynonymous SNV	ENSG00000178209:ENST00000322810:exon31:c.C4807T:p.R1603C,ENSG00000178209:ENST00000345136:exon31:c.C4396T:p.R1466C,ENSG00000178209:ENST00000354589:exon31:c.C4396T:p.R1466C,ENSG00000178209:ENST00000354958:exon31:c.C4330T:p.R1444C,ENSG00000178209:ENST00000356346:exon31:c.C4354T:p.R1452C,ENSG00000178209:ENST00000357649:exon31:c.C4408T:p.R1470C,ENSG00000178209:ENST00000398774:exon31:c.C4300T:p.R1434C,…	rs782015718	Uncertain significance	not_specified	RCV000177603.1	MedGen	CN169374
8	144999731	144999731	C	T	exonic	PLEC	.	nonsynonymous SNV	PLEC:NM_201378:exon31:c.G4324A:p.V1442M,PLEC:NM_201379:exon31:c.G4300A:p.V1434M,PLEC:NM_201380:exon31:c.G4777A:p.V1593M,PLEC:NM_201381:exon31:c.G4270A:p.V1424M,PLEC:NM_201382:exon31:c.G4366A:p.V1456M,PLEC:NM_201383:exon31:c.G4378A:p.V1460M,PLEC:NM_201384:exon31:c.G4366A:p.V1456M,PLEC:NM_000445:exon32:c.G4447A:p.V1483M	exonic	ENSG00000178209	.	nonsynonymous SNV	ENSG00000178209:ENST00000322810:exon31:c.G4777A:p.V1593M,ENSG00000178209:ENST00000345136:exon31:c.G4366A:p.V1456M,ENSG00000178209:ENST00000354589:exon31:c.G4366A:p.V1456M,ENSG00000178209:ENST00000354958:exon31:c.G4300A:p.V1434M,ENSG00000178209:ENST00000356346:exon31:c.G4324A:p.V1442M,ENSG00000178209:ENST00000357649:exon31:c.G4378A:p.V1460M,ENSG00000178209:ENST00000398774:exon31:c.G4270A:p.V1424M,…	rs186848953	Likely benign	not_specified	RCV000313406.3	MedGen	CN169374
8	144999734	144999734	G	A	exonic	PLEC	.	nonsynonymous SNV	PLEC:NM_201378:exon31:c.C4321T:p.R1441C,PLEC:NM_201379:exon31:c.C4297T:p.R1433C,PLEC:NM_201380:exon31:c.C4774T:p.R1592C,PLEC:NM_201381:exon31:c.C4267T:p.R1423C,PLEC:NM_201382:exon31:c.C4363T:p.R1455C,PLEC:NM_201383:exon31:c.C4375T:p.R1459C,PLEC:NM_201384:exon31:c.C4363T:p.R1455C,PLEC:NM_000445:exon32:c.C4444T:p.R1482C	exonic	ENSG00000178209	.	nonsynonymous SNV	ENSG00000178209:ENST00000322810:exon31:c.C4774T:p.R1592C,ENSG00000178209:ENST00000345136:exon31:c.C4363T:p.R1455C,ENSG00000178209:ENST00000354589:exon31:c.C4363T:p.R1455C,ENSG00000178209:ENST00000354958:exon31:c.C4297T:p.R1433C,ENSG00000178209:ENST00000356346:exon31:c.C4321T:p.R1441C,ENSG00000178209:ENST00000357649:exon31:c.C4375T:p.R1459C,ENSG00000178209:ENST00000398774:exon31:c.C4267T:p.R1423C,…	rs782436596	Uncertain significance	not_specified	RCV000315578.1	MedGen	CN169374
8	144999746	144999746	C	T	exonic	PLEC	.	nonsynonymous SNV	PLEC:NM_201378:exon31:c.G4309A:p.E1437K,PLEC:NM_201379:exon31:c.G4285A:p.E1429K,PLEC:NM_201380:exon31:c.G4762A:p.E1588K,PLEC:NM_201381:exon31:c.G4255A:p.E1419K,PLEC:NM_201382:exon31:c.G4351A:p.E1451K,PLEC:NM_201383:exon31:c.G4363A:p.E1455K,PLEC:NM_201384:exon31:c.G4351A:p.E1451K,PLEC:NM_000445:exon32:c.G4432A:p.E1478K	exonic	ENSG00000178209	.	nonsynonymous SNV	ENSG00000178209:ENST00000322810:exon31:c.G4762A:p.E1588K,ENSG00000178209:ENST00000345136:exon31:c.G4351A:p.E1451K,ENSG00000178209:ENST00000354589:exon31:c.G4351A:p.E1451K,ENSG00000178209:ENST00000354958:exon31:c.G4285A:p.E1429K,ENSG00000178209:ENST00000356346:exon31:c.G4309A:p.E1437K,ENSG00000178209:ENST00000357649:exon31:c.G4363A:p.E1455K,ENSG00000178209:ENST00000398774:exon31:c.G4255A:p.E1419K,…	rs868906137	Uncertain significance	not_specified	RCV000338251.2	MedGen	CN169374
8	144999758	144999758	G	A	exonic	PLEC	.	nonsynonymous SNV	PLEC:NM_201378:exon31:c.C4297T:p.R1433W,PLEC:NM_201379:exon31:c.C4273T:p.R1425W,PLEC:NM_201380:exon31:c.C4750T:p.R1584W,PLEC:NM_201381:exon31:c.C4243T:p.R1415W,PLEC:NM_201382:exon31:c.C4339T:p.R1447W,PLEC:NM_201383:exon31:c.C4351T:p.R1451W,PLEC:NM_201384:exon31:c.C4339T:p.R1447W,PLEC:NM_000445:exon32:c.C4420T:p.R1474W	exonic	ENSG00000178209	.	nonsynonymous SNV	ENSG00000178209:ENST00000322810:exon31:c.C4750T:p.R1584W,ENSG00000178209:ENST00000345136:exon31:c.C4339T:p.R1447W,ENSG00000178209:ENST00000354589:exon31:c.C4339T:p.R1447W,ENSG00000178209:ENST00000354958:exon31:c.C4273T:p.R1425W,ENSG00000178209:ENST00000356346:exon31:c.C4297T:p.R1433W,ENSG00000178209:ENST00000357649:exon31:c.C4351T:p.R1451W,ENSG00000178209:ENST00000398774:exon31:c.C4243T:p.R1415W,…	rs782057352	Uncertain significance	not_specified	RCV000486697.1	MedGen	CN169374
8	144999774	144999774	C	G	exonic	PLEC	.	nonsynonymous SNV	PLEC:NM_201378:exon31:c.G4281C:p.E1427D,PLEC:NM_201379:exon31:c.G4257C:p.E1419D,PLEC:NM_201380:exon31:c.G4734C:p.E1578D,PLEC:NM_201381:exon31:c.G4227C:p.E1409D,PLEC:NM_201382:exon31:c.G4323C:p.E1441D,PLEC:NM_201383:exon31:c.G4335C:p.E1445D,PLEC:NM_201384:exon31:c.G4323C:p.E1441D,PLEC:NM_000445:exon32:c.G4404C:p.E1468D	exonic	ENSG00000178209	.	nonsynonymous SNV	ENSG00000178209:ENST00000322810:exon31:c.G4734C:p.E1578D,ENSG00000178209:ENST00000345136:exon31:c.G4323C:p.E1441D,ENSG00000178209:ENST00000354589:exon31:c.G4323C:p.E1441D,ENSG00000178209:ENST00000354958:exon31:c.G4257C:p.E1419D,ENSG00000178209:ENST00000356346:exon31:c.G4281C:p.E1427D,ENSG00000178209:ENST00000357649:exon31:c.G4335C:p.E1445D,ENSG00000178209:ENST00000398774:exon31:c.G4227C:p.E1409D,…	rs782706697	Uncertain significance	not_specified	RCV000483367.1	MedGen	CN169374
8	144999842	144999842	G	A	exonic	PLEC	.	stopgain	PLEC:NM_201378:exon31:c.C4213T:p.Q1405X,PLEC:NM_201379:exon31:c.C4189T:p.Q1397X,PLEC:NM_201380:exon31:c.C4666T:p.Q1556X,PLEC:NM_201381:exon31:c.C4159T:p.Q1387X,PLEC:NM_201382:exon31:c.C4255T:p.Q1419X,PLEC:NM_201383:exon31:c.C4267T:p.Q1423X,PLEC:NM_201384:exon31:c.C4255T:p.Q1419X,PLEC:NM_000445:exon32:c.C4336T:p.Q1446X	exonic	ENSG00000178209	.	stopgain	ENSG00000178209:ENST00000322810:exon31:c.C4666T:p.Q1556X,ENSG00000178209:ENST00000345136:exon31:c.C4255T:p.Q1419X,ENSG00000178209:ENST00000354589:exon31:c.C4255T:p.Q1419X,ENSG00000178209:ENST00000354958:exon31:c.C4189T:p.Q1397X,ENSG00000178209:ENST00000356346:exon31:c.C4213T:p.Q1405X,ENSG00000178209:ENST00000357649:exon31:c.C4267T:p.Q1423X,ENSG00000178209:ENST00000398774:exon31:c.C4159T:p.Q1387X,…	.	Pathogenic	Epidermolysa_bullosa_simplex_and_limb_girdle_muscular_dystrophy	RCV000296126.2	MedGen:OMIM:Orphanet	C2931072:226670:ORPHA257
8	144999874	144999874	G	A	exonic	PLEC	.	nonsynonymous SNV	PLEC:NM_201378:exon31:c.C4181T:p.A1394V,PLEC:NM_201379:exon31:c.C4157T:p.A1386V,PLEC:NM_201380:exon31:c.C4634T:p.A1545V,PLEC:NM_201381:exon31:c.C4127T:p.A1376V,PLEC:NM_201382:exon31:c.C4223T:p.A1408V,PLEC:NM_201383:exon31:c.C4235T:p.A1412V,PLEC:NM_201384:exon31:c.C4223T:p.A1408V,PLEC:NM_000445:exon32:c.C4304T:p.A1435V	exonic	ENSG00000178209	.	nonsynonymous SNV	ENSG00000178209:ENST00000322810:exon31:c.C4634T:p.A1545V,ENSG00000178209:ENST00000345136:exon31:c.C4223T:p.A1408V,ENSG00000178209:ENST00000354589:exon31:c.C4223T:p.A1408V,ENSG00000178209:ENST00000354958:exon31:c.C4157T:p.A1386V,ENSG00000178209:ENST00000356346:exon31:c.C4181T:p.A1394V,ENSG00000178209:ENST00000357649:exon31:c.C4235T:p.A1412V,ENSG00000178209:ENST00000398774:exon31:c.C4127T:p.A1376V,…	rs111851716	other	not_specified	RCV000117969.4	MedGen	CN169374
8	144999883	144999883	T	C	exonic	PLEC	.	nonsynonymous SNV	PLEC:NM_201378:exon31:c.A4172G:p.E1391G,PLEC:NM_201379:exon31:c.A4148G:p.E1383G,PLEC:NM_201380:exon31:c.A4625G:p.E1542G,PLEC:NM_201381:exon31:c.A4118G:p.E1373G,PLEC:NM_201382:exon31:c.A4214G:p.E1405G,PLEC:NM_201383:exon31:c.A4226G:p.E1409G,PLEC:NM_201384:exon31:c.A4214G:p.E1405G,PLEC:NM_000445:exon32:c.A4295G:p.E1432G	exonic	ENSG00000178209	.	nonsynonymous SNV	ENSG00000178209:ENST00000322810:exon31:c.A4625G:p.E1542G,ENSG00000178209:ENST00000345136:exon31:c.A4214G:p.E1405G,ENSG00000178209:ENST00000354589:exon31:c.A4214G:p.E1405G,ENSG00000178209:ENST00000354958:exon31:c.A4148G:p.E1383G,ENSG00000178209:ENST00000356346:exon31:c.A4172G:p.E1391G,ENSG00000178209:ENST00000357649:exon31:c.A4226G:p.E1409G,ENSG00000178209:ENST00000398774:exon31:c.A4118G:p.E1373G,…	.	Uncertain significance	not_specified	RCV000336792.2	MedGen	CN169374
8	144999910	144999910	C	T	exonic	PLEC	.	nonsynonymous SNV	PLEC:NM_201378:exon31:c.G4145A:p.R1382H,PLEC:NM_201379:exon31:c.G4121A:p.R1374H,PLEC:NM_201380:exon31:c.G4598A:p.R1533H,PLEC:NM_201381:exon31:c.G4091A:p.R1364H,PLEC:NM_201382:exon31:c.G4187A:p.R1396H,PLEC:NM_201383:exon31:c.G4199A:p.R1400H,PLEC:NM_201384:exon31:c.G4187A:p.R1396H,PLEC:NM_000445:exon32:c.G4268A:p.R1423H	exonic	ENSG00000178209	.	nonsynonymous SNV	ENSG00000178209:ENST00000322810:exon31:c.G4598A:p.R1533H,ENSG00000178209:ENST00000345136:exon31:c.G4187A:p.R1396H,ENSG00000178209:ENST00000354589:exon31:c.G4187A:p.R1396H,ENSG00000178209:ENST00000354958:exon31:c.G4121A:p.R1374H,ENSG00000178209:ENST00000356346:exon31:c.G4145A:p.R1382H,ENSG00000178209:ENST00000357649:exon31:c.G4199A:p.R1400H,ENSG00000178209:ENST00000398774:exon31:c.G4091A:p.R1364H,…	rs148159359	Uncertain significance	not_specified	RCV000261101.2	MedGen	CN169374
8	144999980	144999980	G	A	exonic	PLEC	.	nonsynonymous SNV	PLEC:NM_201378:exon31:c.C4075T:p.R1359W,PLEC:NM_201379:exon31:c.C4051T:p.R1351W,PLEC:NM_201380:exon31:c.C4528T:p.R1510W,PLEC:NM_201381:exon31:c.C4021T:p.R1341W,PLEC:NM_201382:exon31:c.C4117T:p.R1373W,PLEC:NM_201383:exon31:c.C4129T:p.R1377W,PLEC:NM_201384:exon31:c.C4117T:p.R1373W,PLEC:NM_000445:exon32:c.C4198T:p.R1400W	exonic	ENSG00000178209	.	nonsynonymous SNV	ENSG00000178209:ENST00000322810:exon31:c.C4528T:p.R1510W,ENSG00000178209:ENST00000345136:exon31:c.C4117T:p.R1373W,ENSG00000178209:ENST00000354589:exon31:c.C4117T:p.R1373W,ENSG00000178209:ENST00000354958:exon31:c.C4051T:p.R1351W,ENSG00000178209:ENST00000356346:exon31:c.C4075T:p.R1359W,ENSG00000178209:ENST00000357649:exon31:c.C4129T:p.R1377W,ENSG00000178209:ENST00000398774:exon31:c.C4021T:p.R1341W,…	rs782378494	Uncertain significance	not_specified	RCV000493043.1	MedGen	CN169374
8	145000019	145000019	C	T	exonic	PLEC	.	nonsynonymous SNV	PLEC:NM_201378:exon31:c.G4036A:p.E1346K,PLEC:NM_201379:exon31:c.G4012A:p.E1338K,PLEC:NM_201380:exon31:c.G4489A:p.E1497K,PLEC:NM_201381:exon31:c.G3982A:p.E1328K,PLEC:NM_201382:exon31:c.G4078A:p.E1360K,PLEC:NM_201383:exon31:c.G4090A:p.E1364K,PLEC:NM_201384:exon31:c.G4078A:p.E1360K,PLEC:NM_000445:exon32:c.G4159A:p.E1387K	exonic	ENSG00000178209	.	nonsynonymous SNV	ENSG00000178209:ENST00000322810:exon31:c.G4489A:p.E1497K,ENSG00000178209:ENST00000345136:exon31:c.G4078A:p.E1360K,ENSG00000178209:ENST00000354589:exon31:c.G4078A:p.E1360K,ENSG00000178209:ENST00000354958:exon31:c.G4012A:p.E1338K,ENSG00000178209:ENST00000356346:exon31:c.G4036A:p.E1346K,ENSG00000178209:ENST00000357649:exon31:c.G4090A:p.E1364K,ENSG00000178209:ENST00000398774:exon31:c.G3982A:p.E1328K,…	rs782455948	Uncertain significance	not_specified	RCV000311221.1	MedGen	CN169374
8	145000021	145000021	C	T	exonic	PLEC	.	nonsynonymous SNV	PLEC:NM_201378:exon31:c.G4034A:p.R1345H,PLEC:NM_201379:exon31:c.G4010A:p.R1337H,PLEC:NM_201380:exon31:c.G4487A:p.R1496H,PLEC:NM_201381:exon31:c.G3980A:p.R1327H,PLEC:NM_201382:exon31:c.G4076A:p.R1359H,PLEC:NM_201383:exon31:c.G4088A:p.R1363H,PLEC:NM_201384:exon31:c.G4076A:p.R1359H,PLEC:NM_000445:exon32:c.G4157A:p.R1386H	exonic	ENSG00000178209	.	nonsynonymous SNV	ENSG00000178209:ENST00000322810:exon31:c.G4487A:p.R1496H,ENSG00000178209:ENST00000345136:exon31:c.G4076A:p.R1359H,ENSG00000178209:ENST00000354589:exon31:c.G4076A:p.R1359H,ENSG00000178209:ENST00000354958:exon31:c.G4010A:p.R1337H,ENSG00000178209:ENST00000356346:exon31:c.G4034A:p.R1345H,ENSG00000178209:ENST00000357649:exon31:c.G4088A:p.R1363H,ENSG00000178209:ENST00000398774:exon31:c.G3980A:p.R1327H,…	rs574482100	Uncertain significance|Uncertain significance	not_specified|not_provided	RCV000177600.3|RCV000415901.1	MedGen|MedGen	CN169374|CN221809
19	14521083	14521083	A	T	exonic;exonic	DDX39A	.	nonsynonymous SNV;nonsynonymous SNV	DDX39A:NM_005804:exon6:c.T677A:p.F226Y;DDX39A:NM_005804:exon6:c.T677A:p.F226Y	exonic;exonic	ENSG00000123136	.	nonsynonymous SNV;nonsynonymous SNV	ENSG00000123136:ENST00000454233:exon5:c.T677A:p.F226Y,ENSG00000123136:ENST00000588692:exon5:c.T677A:p.F226Y,ENSG00000123136:ENST00000242776:exon6:c.T677A:p.F226Y,ENSG00000123136:ENST00000324340:exon6:c.T677A:p.F226Y,ENSG00000123136:ENST00000589675:exon6:c.T710A:p.F237Y;ENSG00000123136:ENST00000454233:exon5:c.T677A:p.F226Y,ENSG00000123136:ENST00000588692:exon5:c.T677A:p.F226Y,ENSG00000123136:ENST0…	rs786205516	Likely pathogenic	not_provided	RCV000171279.1	MedGen	CN221809
1	150483951	150483951	C	T	exonic;exonic	ECM1	.	stopgain;stopgain	ECM1:NM_001202858:exon7:c.C808T:p.R270X,ECM1:NM_004425:exon7:c.C727T:p.R243X;ECM1:NM_001202858:exon7:c.C808T:p.R270X,ECM1:NM_004425:exon7:c.C727T:p.R243X	exonic;exonic	ENSG00000143369	.	stopgain;stopgain	ENSG00000143369:ENST00000369047:exon7:c.C727T:p.R243X,ENSG00000143369:ENST00000369049:exon7:c.C808T:p.R270X;ENSG00000143369:ENST00000369047:exon7:c.C727T:p.R243X,ENSG00000143369:ENST00000369049:exon7:c.C808T:p.R270X	rs746217361	Pathogenic	Lipid_proteinosis	RCV000208570.1	MedGen:OMIM:Orphanet:SNOMED_CT	C0023795:247100:ORPHA530:38692000
1	150484050	150484050	C	T	exonic;exonic	ECM1	.	stopgain;stopgain	ECM1:NM_001202858:exon7:c.C907T:p.Q303X,ECM1:NM_004425:exon7:c.C826T:p.Q276X;ECM1:NM_001202858:exon7:c.C907T:p.Q303X,ECM1:NM_004425:exon7:c.C826T:p.Q276X	exonic;exonic	ENSG00000143369	.	stopgain;stopgain	ENSG00000143369:ENST00000369047:exon7:c.C826T:p.Q276X,ENSG00000143369:ENST00000369049:exon7:c.C907T:p.Q303X;ENSG00000143369:ENST00000369047:exon7:c.C826T:p.Q276X,ENSG00000143369:ENST00000369049:exon7:c.C907T:p.Q303X	rs869025563	Pathogenic	Lipid_proteinosis	RCV000208541.1	MedGen:OMIM:Orphanet:SNOMED_CT	C0023795:247100:ORPHA530:38692000
1	150484260	150484260	C	T	exonic;exonic	ECM1	.	stopgain;stopgain	ECM1:NM_001202858:exon7:c.C1117T:p.Q373X,ECM1:NM_004425:exon7:c.C1036T:p.Q346X;ECM1:NM_001202858:exon7:c.C1117T:p.Q373X,ECM1:NM_004425:exon7:c.C1036T:p.Q346X	exonic;exonic	ENSG00000143369	.	stopgain;stopgain	ENSG00000143369:ENST00000369047:exon7:c.C1036T:p.Q346X,ENSG00000143369:ENST00000369049:exon7:c.C1117T:p.Q373X;ENSG00000143369:ENST00000369047:exon7:c.C1036T:p.Q346X,ENSG00000143369:ENST00000369049:exon7:c.C1117T:p.Q373X	rs121909114	Pathogenic	Lipid_proteinosis	RCV000007898.2	MedGen:OMIM:Orphanet:SNOMED_CT	C0023795:247100:ORPHA530:38692000
X	153585812	153585812	G	T	exonic	FLNA	.	stopgain	FLNA:NM_001110556:exon29:c.C4935A:p.C1645X,FLNA:NM_001456:exon29:c.C4935A:p.C1645X	exonic	ENSG00000196924	.	stopgain	ENSG00000196924:ENST00000344736:exon28:c.C4935A:p.C1645X,ENSG00000196924:ENST00000360319:exon28:c.C4935A:p.C1645X,ENSG00000196924:ENST00000369850:exon29:c.C4935A:p.C1645X,ENSG00000196924:ENST00000422373:exon29:c.C4935A:p.C1645X	rs786205197	Likely pathogenic	Periventricular_nodular_heterotopia_1	RCV000170419.1	MedGen:OMIM:OMIM:SNOMED_CT	C1848213:300049:300537:448227009
X	153585829	153585829	C	T	exonic	FLNA	.	nonsynonymous SNV	FLNA:NM_001110556:exon29:c.G4918A:p.G1640R,FLNA:NM_001456:exon29:c.G4918A:p.G1640R	exonic	ENSG00000196924	.	nonsynonymous SNV	ENSG00000196924:ENST00000344736:exon28:c.G4918A:p.G1640R,ENSG00000196924:ENST00000360319:exon28:c.G4918A:p.G1640R,ENSG00000196924:ENST00000369850:exon29:c.G4918A:p.G1640R,ENSG00000196924:ENST00000422373:exon29:c.G4918A:p.G1640R	.	Uncertain significance	not_specified	RCV000418133.1	MedGen	CN169374
1	156107455	156107455	T	C	exonic	LMNA	.	nonsynonymous SNV	LMNA:NM_001257374:exon10:c.T1283C:p.M428T,LMNA:NM_001282626:exon10:c.T1619C:p.M540T,LMNA:NM_005572:exon10:c.T1619C:p.M540T,LMNA:NM_170707:exon10:c.T1619C:p.M540T,LMNA:NM_001282624:exon11:c.T1376C:p.M459T,LMNA:NM_001282625:exon13:c.T1619C:p.M540T	exonic	ENSG00000160789	.	nonsynonymous SNV	ENSG00000160789:ENST00000361308:exon10:c.T1619C:p.M540T,ENSG00000160789:ENST00000368299:exon10:c.T1619C:p.M540T,ENSG00000160789:ENST00000368300:exon10:c.T1619C:p.M540T,ENSG00000160789:ENST00000392353:exon10:c.T1376C:p.M459T,ENSG00000160789:ENST00000448611:exon10:c.T1283C:p.M428T,ENSG00000160789:ENST00000368297:exon11:c.T1376C:p.M459T,ENSG00000160789:ENST00000473598:exon11:c.T1322C:p.M441T,ENSG000…	rs267607547	not provided|Pathogenic	not_provided|Hutchinson-Gilford_syndrome	RCV000057340.1|RCV000192012.2	MedGen|MedGen:OMIM:Orphanet:SNOMED_CT	CN221809|C0033300:176670:ORPHA740:238870004
1	156107456	156107456	G	A	exonic	LMNA	.	nonsynonymous SNV	LMNA:NM_001257374:exon10:c.G1284A:p.M428I,LMNA:NM_001282626:exon10:c.G1620A:p.M540I,LMNA:NM_005572:exon10:c.G1620A:p.M540I,LMNA:NM_170707:exon10:c.G1620A:p.M540I,LMNA:NM_001282624:exon11:c.G1377A:p.M459I,LMNA:NM_001282625:exon13:c.G1620A:p.M540I	exonic	ENSG00000160789	.	nonsynonymous SNV	ENSG00000160789:ENST00000361308:exon10:c.G1620A:p.M540I,ENSG00000160789:ENST00000368299:exon10:c.G1620A:p.M540I,ENSG00000160789:ENST00000368300:exon10:c.G1620A:p.M540I,ENSG00000160789:ENST00000392353:exon10:c.G1377A:p.M459I,ENSG00000160789:ENST00000448611:exon10:c.G1284A:p.M428I,ENSG00000160789:ENST00000368297:exon11:c.G1377A:p.M459I,ENSG00000160789:ENST00000473598:exon11:c.G1323A:p.M441I,ENSG000…	rs483352811	Pathogenic	Mandibuloacral_dysplasia_with_type_A_lipodystrophy	RCV000087081.2	MedGen	CN236772
1	156107457	156107457	C	A	exonic	LMNA	.	nonsynonymous SNV	LMNA:NM_001257374:exon10:c.C1285A:p.R429S,LMNA:NM_001282626:exon10:c.C1621A:p.R541S,LMNA:NM_005572:exon10:c.C1621A:p.R541S,LMNA:NM_170707:exon10:c.C1621A:p.R541S,LMNA:NM_001282624:exon11:c.C1378A:p.R460S,LMNA:NM_001282625:exon13:c.C1621A:p.R541S	exonic	ENSG00000160789	.	nonsynonymous SNV	ENSG00000160789:ENST00000361308:exon10:c.C1621A:p.R541S,ENSG00000160789:ENST00000368299:exon10:c.C1621A:p.R541S,ENSG00000160789:ENST00000368300:exon10:c.C1621A:p.R541S,ENSG00000160789:ENST00000392353:exon10:c.C1378A:p.R460S,ENSG00000160789:ENST00000448611:exon10:c.C1285A:p.R429S,ENSG00000160789:ENST00000368297:exon11:c.C1378A:p.R460S,ENSG00000160789:ENST00000473598:exon11:c.C1324A:p.R442S,ENSG000…	rs56984562	not provided	not_provided	RCV000057341.1	MedGen	CN221809
1	156107457	156107457	C	G	exonic	LMNA	.	nonsynonymous SNV	LMNA:NM_001257374:exon10:c.C1285G:p.R429G,LMNA:NM_001282626:exon10:c.C1621G:p.R541G,LMNA:NM_005572:exon10:c.C1621G:p.R541G,LMNA:NM_170707:exon10:c.C1621G:p.R541G,LMNA:NM_001282624:exon11:c.C1378G:p.R460G,LMNA:NM_001282625:exon13:c.C1621G:p.R541G	exonic	ENSG00000160789	.	nonsynonymous SNV	ENSG00000160789:ENST00000361308:exon10:c.C1621G:p.R541G,ENSG00000160789:ENST00000368299:exon10:c.C1621G:p.R541G,ENSG00000160789:ENST00000368300:exon10:c.C1621G:p.R541G,ENSG00000160789:ENST00000392353:exon10:c.C1378G:p.R460G,ENSG00000160789:ENST00000448611:exon10:c.C1285G:p.R429G,ENSG00000160789:ENST00000368297:exon11:c.C1378G:p.R460G,ENSG00000160789:ENST00000473598:exon11:c.C1324G:p.R442G,ENSG000…	rs56984562	Pathogenic|not provided	Dilated_cardiomyopathy_1A|not_provided	RCV000022641.22|RCV000057342.1	MedGen:OMIM:Orphanet|MedGen	C1449563:115200:ORPHA300751|CN221809
1	156107457	156107457	C	T	exonic	LMNA	.	nonsynonymous SNV	LMNA:NM_001257374:exon10:c.C1285T:p.R429C,LMNA:NM_001282626:exon10:c.C1621T:p.R541C,LMNA:NM_005572:exon10:c.C1621T:p.R541C,LMNA:NM_170707:exon10:c.C1621T:p.R541C,LMNA:NM_001282624:exon11:c.C1378T:p.R460C,LMNA:NM_001282625:exon13:c.C1621T:p.R541C	exonic	ENSG00000160789	.	nonsynonymous SNV	ENSG00000160789:ENST00000361308:exon10:c.C1621T:p.R541C,ENSG00000160789:ENST00000368299:exon10:c.C1621T:p.R541C,ENSG00000160789:ENST00000368300:exon10:c.C1621T:p.R541C,ENSG00000160789:ENST00000392353:exon10:c.C1378T:p.R460C,ENSG00000160789:ENST00000448611:exon10:c.C1285T:p.R429C,ENSG00000160789:ENST00000368297:exon11:c.C1378T:p.R460C,ENSG00000160789:ENST00000473598:exon11:c.C1324T:p.R442C,ENSG000…	rs56984562	Pathogenic|Pathogenic|Pathogenic|Pathogenic|Pathogenic	Dilated_cardiomyopathy_1A|not_provided|Primary_dilated_cardiomyopathy|Cardiovascular_phenotype|Charcot-Marie-Tooth_disease,_type_2	RCV000041325.5|RCV000057343.4|RCV000211786.1|RCV000242991.1|RCV000462793.1	MedGen:OMIM:Orphanet|MedGen|MedGen:Orphanet:SNOMED_CT|MedGen|MedGen	C1449563:115200:ORPHA300751|CN221809|C0007193:ORPHA217604:195021004|CN230736|CN043576
1	156107458	156107458	G	A	exonic	LMNA	.	nonsynonymous SNV	LMNA:NM_001257374:exon10:c.G1286A:p.R429H,LMNA:NM_001282626:exon10:c.G1622A:p.R541H,LMNA:NM_005572:exon10:c.G1622A:p.R541H,LMNA:NM_170707:exon10:c.G1622A:p.R541H,LMNA:NM_001282624:exon11:c.G1379A:p.R460H,LMNA:NM_001282625:exon13:c.G1622A:p.R541H	exonic	ENSG00000160789	.	nonsynonymous SNV	ENSG00000160789:ENST00000361308:exon10:c.G1622A:p.R541H,ENSG00000160789:ENST00000368299:exon10:c.G1622A:p.R541H,ENSG00000160789:ENST00000368300:exon10:c.G1622A:p.R541H,ENSG00000160789:ENST00000392353:exon10:c.G1379A:p.R460H,ENSG00000160789:ENST00000448611:exon10:c.G1286A:p.R429H,ENSG00000160789:ENST00000368297:exon11:c.G1379A:p.R460H,ENSG00000160789:ENST00000473598:exon11:c.G1325A:p.R442H,ENSG000…	rs61444459	other|Pathogenic|Pathogenic|Likely pathogenic|Uncertain significance|Likely pathogenic	not_provided|Primary_dilated_cardiomyopathy|Charcot-Marie-Tooth_disease,_type_2|Cardiovascular_phenotype|not_specified|Dilated_cardiomyopathy	RCV000057344.2|RCV000221013.1|RCV000230467.1|RCV000246865.1|RCV000277868.1|RCV000497891.1	MedGen|MedGen:Orphanet:SNOMED_CT|MedGen|MedGen|MedGen|EFO:Human_Phenotype_Ontology:MedGen	CN221809|C0007193:ORPHA217604:195021004|CN043576|CN230736|CN169374|EFO_0000407:HP:0001644:CN001497
1	156107458	156107458	G	C	exonic	LMNA	.	nonsynonymous SNV	LMNA:NM_001257374:exon10:c.G1286C:p.R429P,LMNA:NM_001282626:exon10:c.G1622C:p.R541P,LMNA:NM_005572:exon10:c.G1622C:p.R541P,LMNA:NM_170707:exon10:c.G1622C:p.R541P,LMNA:NM_001282624:exon11:c.G1379C:p.R460P,LMNA:NM_001282625:exon13:c.G1622C:p.R541P	exonic	ENSG00000160789	.	nonsynonymous SNV	ENSG00000160789:ENST00000361308:exon10:c.G1622C:p.R541P,ENSG00000160789:ENST00000368299:exon10:c.G1622C:p.R541P,ENSG00000160789:ENST00000368300:exon10:c.G1622C:p.R541P,ENSG00000160789:ENST00000392353:exon10:c.G1379C:p.R460P,ENSG00000160789:ENST00000448611:exon10:c.G1286C:p.R429P,ENSG00000160789:ENST00000368297:exon11:c.G1379C:p.R460P,ENSG00000160789:ENST00000473598:exon11:c.G1325C:p.R442P,ENSG000…	rs61444459	Likely pathogenic	not_provided	RCV000057345.1	MedGen	CN221809
1	156107462	156107462	G	C	exonic	LMNA	.	nonsynonymous SNV	LMNA:NM_001257374:exon10:c.G1290C:p.K430N,LMNA:NM_001282626:exon10:c.G1626C:p.K542N,LMNA:NM_005572:exon10:c.G1626C:p.K542N,LMNA:NM_170707:exon10:c.G1626C:p.K542N,LMNA:NM_001282624:exon11:c.G1383C:p.K461N,LMNA:NM_001282625:exon13:c.G1626C:p.K542N	exonic	ENSG00000160789	.	nonsynonymous SNV	ENSG00000160789:ENST00000361308:exon10:c.G1626C:p.K542N,ENSG00000160789:ENST00000368299:exon10:c.G1626C:p.K542N,ENSG00000160789:ENST00000368300:exon10:c.G1626C:p.K542N,ENSG00000160789:ENST00000392353:exon10:c.G1383C:p.K461N,ENSG00000160789:ENST00000448611:exon10:c.G1290C:p.K430N,ENSG00000160789:ENST00000368297:exon11:c.G1383C:p.K461N,ENSG00000160789:ENST00000473598:exon11:c.G1329C:p.K443N,ENSG000…	rs56673169	Pathogenic|not provided	Mandibuloacral_dysostosis|not_provided	RCV000015603.26|RCV000057346.1	MedGen:OMIM:Orphanet:SNOMED_CT|MedGen	C0432291:248370:ORPHA2457:109419009|CN221809
1	156107464	156107464	T	C	exonic	LMNA	.	nonsynonymous SNV	LMNA:NM_001257374:exon10:c.T1292C:p.L431P,LMNA:NM_001282626:exon10:c.T1628C:p.L543P,LMNA:NM_005572:exon10:c.T1628C:p.L543P,LMNA:NM_170707:exon10:c.T1628C:p.L543P,LMNA:NM_001282624:exon11:c.T1385C:p.L462P,LMNA:NM_001282625:exon13:c.T1628C:p.L543P	exonic	ENSG00000160789	.	nonsynonymous SNV	ENSG00000160789:ENST00000361308:exon10:c.T1628C:p.L543P,ENSG00000160789:ENST00000368299:exon10:c.T1628C:p.L543P,ENSG00000160789:ENST00000368300:exon10:c.T1628C:p.L543P,ENSG00000160789:ENST00000392353:exon10:c.T1385C:p.L462P,ENSG00000160789:ENST00000448611:exon10:c.T1292C:p.L431P,ENSG00000160789:ENST00000368297:exon11:c.T1385C:p.L462P,ENSG00000160789:ENST00000473598:exon11:c.T1331C:p.L444P,ENSG000…	.	Uncertain significance	not_specified	RCV000268863.2	MedGen	CN169374
1	156107469	156107469	C	T	exonic	LMNA	.	nonsynonymous SNV	LMNA:NM_001257374:exon10:c.C1297T:p.R433C,LMNA:NM_001282626:exon10:c.C1633T:p.R545C,LMNA:NM_005572:exon10:c.C1633T:p.R545C,LMNA:NM_170707:exon10:c.C1633T:p.R545C,LMNA:NM_001282624:exon11:c.C1390T:p.R464C,LMNA:NM_001282625:exon13:c.C1633T:p.R545C	exonic	ENSG00000160789	.	nonsynonymous SNV	ENSG00000160789:ENST00000361308:exon10:c.C1633T:p.R545C,ENSG00000160789:ENST00000368299:exon10:c.C1633T:p.R545C,ENSG00000160789:ENST00000368300:exon10:c.C1633T:p.R545C,ENSG00000160789:ENST00000392353:exon10:c.C1390T:p.R464C,ENSG00000160789:ENST00000448611:exon10:c.C1297T:p.R433C,ENSG00000160789:ENST00000368297:exon11:c.C1390T:p.R464C,ENSG00000160789:ENST00000473598:exon11:c.C1336T:p.R446C,ENSG000…	rs267607613	not provided|Uncertain significance|Uncertain significance	not_provided|Primary_familial_hypertrophic_cardiomyopathy|not_specified	RCV000057347.1|RCV000208352.1|RCV000454519.1	MedGen|MedGen:Orphanet:SNOMED_CT|MedGen	CN221809|C0949658:ORPHA155:83978005|CN169374
1	156107470	156107470	G	A	exonic	LMNA	.	nonsynonymous SNV	LMNA:NM_001257374:exon10:c.G1298A:p.R433H,LMNA:NM_001282626:exon10:c.G1634A:p.R545H,LMNA:NM_005572:exon10:c.G1634A:p.R545H,LMNA:NM_170707:exon10:c.G1634A:p.R545H,LMNA:NM_001282624:exon11:c.G1391A:p.R464H,LMNA:NM_001282625:exon13:c.G1634A:p.R545H	exonic	ENSG00000160789	.	nonsynonymous SNV	ENSG00000160789:ENST00000361308:exon10:c.G1634A:p.R545H,ENSG00000160789:ENST00000368299:exon10:c.G1634A:p.R545H,ENSG00000160789:ENST00000368300:exon10:c.G1634A:p.R545H,ENSG00000160789:ENST00000392353:exon10:c.G1391A:p.R464H,ENSG00000160789:ENST00000448611:exon10:c.G1298A:p.R433H,ENSG00000160789:ENST00000368297:exon11:c.G1391A:p.R464H,ENSG00000160789:ENST00000473598:exon11:c.G1337A:p.R446H,ENSG000…	rs142191737	Uncertain significance|Uncertain significance|Uncertain significance|Likely pathogenic	not_specified|Peripheral_neuropathy|Charcot-Marie-Tooth_disease,_type_2|Dilated_cardiomyopathy_1S	RCV000150955.3|RCV000449630.1|RCV000468904.1|RCV000491650.1	MedGen|MedGen|MedGen|MedGen:OMIM	CN169374|C0031117|CN043576|C1834481:613426
1	156107473	156107473	C	T	exonic	LMNA	.	nonsynonymous SNV	LMNA:NM_001257374:exon10:c.C1301T:p.S434L,LMNA:NM_001282626:exon10:c.C1637T:p.S546L,LMNA:NM_005572:exon10:c.C1637T:p.S546L,LMNA:NM_170707:exon10:c.C1637T:p.S546L,LMNA:NM_001282624:exon11:c.C1394T:p.S465L,LMNA:NM_001282625:exon13:c.C1637T:p.S546L	exonic	ENSG00000160789	.	nonsynonymous SNV	ENSG00000160789:ENST00000361308:exon10:c.C1637T:p.S546L,ENSG00000160789:ENST00000368299:exon10:c.C1637T:p.S546L,ENSG00000160789:ENST00000368300:exon10:c.C1637T:p.S546L,ENSG00000160789:ENST00000392353:exon10:c.C1394T:p.S465L,ENSG00000160789:ENST00000448611:exon10:c.C1301T:p.S434L,ENSG00000160789:ENST00000368297:exon11:c.C1394T:p.S465L,ENSG00000160789:ENST00000473598:exon11:c.C1340T:p.S447L,ENSG000…	.	Uncertain significance	Cardiovascular_phenotype	RCV000248129.1	MedGen	CN230736
1	156107493	156107493	G	A	exonic	LMNA	.	nonsynonymous SNV	LMNA:NM_001257374:exon10:c.G1321A:p.D441N,LMNA:NM_001282626:exon10:c.G1657A:p.D553N,LMNA:NM_005572:exon10:c.G1657A:p.D553N,LMNA:NM_170707:exon10:c.G1657A:p.D553N,LMNA:NM_001282624:exon11:c.G1414A:p.D472N,LMNA:NM_001282625:exon13:c.G1657A:p.D553N	exonic	ENSG00000160789	.	nonsynonymous SNV	ENSG00000160789:ENST00000361308:exon10:c.G1657A:p.D553N,ENSG00000160789:ENST00000368299:exon10:c.G1657A:p.D553N,ENSG00000160789:ENST00000368300:exon10:c.G1657A:p.D553N,ENSG00000160789:ENST00000392353:exon10:c.G1414A:p.D472N,ENSG00000160789:ENST00000448611:exon10:c.G1321A:p.D441N,ENSG00000160789:ENST00000368297:exon11:c.G1414A:p.D472N,ENSG00000160789:ENST00000473598:exon11:c.G1360A:p.D454N,ENSG000…	rs373671419	Uncertain significance	not_specified	RCV000334194.2	MedGen	CN169374
1	156107521	156107521	T	A	exonic	LMNA	.	nonsynonymous SNV	LMNA:NM_001257374:exon10:c.T1349A:p.L450H,LMNA:NM_001282626:exon10:c.T1685A:p.L562H,LMNA:NM_005572:exon10:c.T1685A:p.L562H,LMNA:NM_170707:exon10:c.T1685A:p.L562H,LMNA:NM_001282624:exon11:c.T1442A:p.L481H,LMNA:NM_001282625:exon13:c.T1685A:p.L562H	exonic	ENSG00000160789	.	nonsynonymous SNV	ENSG00000160789:ENST00000361308:exon10:c.T1685A:p.L562H,ENSG00000160789:ENST00000368299:exon10:c.T1685A:p.L562H,ENSG00000160789:ENST00000368300:exon10:c.T1685A:p.L562H,ENSG00000160789:ENST00000392353:exon10:c.T1442A:p.L481H,ENSG00000160789:ENST00000448611:exon10:c.T1349A:p.L450H,ENSG00000160789:ENST00000368297:exon11:c.T1442A:p.L481H,ENSG00000160789:ENST00000473598:exon11:c.T1388A:p.L463H,ENSG000…	.	Uncertain significance	not_specified	RCV000489890.1	MedGen	CN169374
1	156107547	156107547	C	A	exonic	LMNA	.	nonsynonymous SNV	LMNA:NM_005572:exon10:c.C1711A:p.R571S,LMNA:NM_001282624:exon11:c.C1468A:p.R490S,LMNA:NM_001282625:exon13:c.C1711A:p.R571S	exonic	ENSG00000160789	.	nonsynonymous SNV	ENSG00000160789:ENST00000361308:exon10:c.C1711A:p.R571S,ENSG00000160789:ENST00000392353:exon10:c.C1468A:p.R490S,ENSG00000160789:ENST00000368297:exon11:c.C1468A:p.R490S,ENSG00000160789:ENST00000368301:exon13:c.C1711A:p.R571S	rs80338938	Pathogenic|not provided	Dilated_cardiomyopathy_1A|not_provided	RCV000015574.25|RCV000057044.1	MedGen:OMIM:Orphanet|MedGen	C1449563:115200:ORPHA300751|CN221809
1	156107547	156107547	C	T	exonic	LMNA	.	nonsynonymous SNV	LMNA:NM_005572:exon10:c.C1711T:p.R571C,LMNA:NM_001282624:exon11:c.C1468T:p.R490C,LMNA:NM_001282625:exon13:c.C1711T:p.R571C	exonic	ENSG00000160789	.	nonsynonymous SNV	ENSG00000160789:ENST00000361308:exon10:c.C1711T:p.R571C,ENSG00000160789:ENST00000392353:exon10:c.C1468T:p.R490C,ENSG00000160789:ENST00000368297:exon11:c.C1468T:p.R490C,ENSG00000160789:ENST00000368301:exon13:c.C1711T:p.R571C	rs80338938	not provided	not_provided	RCV000057045.1	MedGen	CN221809
1	156107548	156107548	G	A	exonic	LMNA	.	nonsynonymous SNV	LMNA:NM_005572:exon10:c.G1712A:p.R571H,LMNA:NM_001282624:exon11:c.G1469A:p.R490H,LMNA:NM_001282625:exon13:c.G1712A:p.R571H	exonic	ENSG00000160789	.	nonsynonymous SNV	ENSG00000160789:ENST00000361308:exon10:c.G1712A:p.R571H,ENSG00000160789:ENST00000392353:exon10:c.G1469A:p.R490H,ENSG00000160789:ENST00000368297:exon11:c.G1469A:p.R490H,ENSG00000160789:ENST00000368301:exon13:c.G1712A:p.R571H	rs200917748	Benign	not_specified	RCV000182349.1	MedGen	CN169374
1	156107550	156107550	C	T	exonic	LMNA	.	nonsynonymous SNV	LMNA:NM_005572:exon10:c.C1714T:p.R572C,LMNA:NM_001282624:exon11:c.C1471T:p.R491C,LMNA:NM_001282625:exon13:c.C1714T:p.R572C	exonic	ENSG00000160789	.	nonsynonymous SNV	ENSG00000160789:ENST00000361308:exon10:c.C1714T:p.R572C,ENSG00000160789:ENST00000392353:exon10:c.C1471T:p.R491C,ENSG00000160789:ENST00000368297:exon11:c.C1471T:p.R491C,ENSG00000160789:ENST00000368301:exon13:c.C1714T:p.R572C	rs773169005	Uncertain significance	not_specified	RCV000182398.3	MedGen	CN169374
1	156108298	156108298	C	T	exonic	LMNA	.	nonsynonymous SNV	LMNA:NM_170708:exon10:c.C1628T:p.S543L,LMNA:NM_001257374:exon11:c.C1382T:p.S461L,LMNA:NM_001282626:exon11:c.C1718T:p.S573L,LMNA:NM_170707:exon11:c.C1718T:p.S573L	exonic	ENSG00000160789	.	nonsynonymous SNV	ENSG00000160789:ENST00000508500:exon5:c.C506T:p.S169L,ENSG00000160789:ENST00000347559:exon10:c.C1628T:p.S543L,ENSG00000160789:ENST00000368299:exon11:c.C1718T:p.S573L,ENSG00000160789:ENST00000368300:exon11:c.C1718T:p.S573L,ENSG00000160789:ENST00000448611:exon11:c.C1382T:p.S461L,ENSG00000160789:ENST00000473598:exon12:c.C1421T:p.S474L	rs60890628	Pathogenic|Pathogenic|Pathogenic|Uncertain significance|Likely pathogenic	Dilated_cardiomyopathy_1A|Mandibuloacral_dysplasia_with_type_A_lipodystrophy,_atypical|Familial_partial_lipodystrophy_2|not_specified|not_provided	RCV000015612.26|RCV000015613.26|RCV000015614.22|RCV000041329.3|RCV000057351.1	MedGen:OMIM:Orphanet|MedGen|MedGen:OMIM:Orphanet|MedGen|MedGen	C1449563:115200:ORPHA300751|CN043412|C1720860:151660:ORPHA2348|CN169374|CN221809
1	156108313	156108313	A	T	exonic	LMNA	.	nonsynonymous SNV	LMNA:NM_170708:exon10:c.A1643T:p.E548V,LMNA:NM_001257374:exon11:c.A1397T:p.E466V,LMNA:NM_001282626:exon11:c.A1733T:p.E578V,LMNA:NM_170707:exon11:c.A1733T:p.E578V	exonic	ENSG00000160789	.	nonsynonymous SNV	ENSG00000160789:ENST00000508500:exon5:c.A521T:p.E174V,ENSG00000160789:ENST00000347559:exon10:c.A1643T:p.E548V,ENSG00000160789:ENST00000368299:exon11:c.A1733T:p.E578V,ENSG00000160789:ENST00000368300:exon11:c.A1733T:p.E578V,ENSG00000160789:ENST00000448611:exon11:c.A1397T:p.E466V,ENSG00000160789:ENST00000473598:exon12:c.A1436T:p.E479V	rs61224243	not provided	not_provided	RCV000057352.1	MedGen	CN221809
1	156108325	156108325	G	A	exonic	LMNA	.	nonsynonymous SNV	LMNA:NM_170708:exon10:c.G1655A:p.R552H,LMNA:NM_001257374:exon11:c.G1409A:p.R470H,LMNA:NM_001282626:exon11:c.G1745A:p.R582H,LMNA:NM_170707:exon11:c.G1745A:p.R582H	exonic	ENSG00000160789	.	nonsynonymous SNV	ENSG00000160789:ENST00000508500:exon5:c.G533A:p.R178H,ENSG00000160789:ENST00000347559:exon10:c.G1655A:p.R552H,ENSG00000160789:ENST00000368299:exon11:c.G1745A:p.R582H,ENSG00000160789:ENST00000368300:exon11:c.G1745A:p.R582H,ENSG00000160789:ENST00000448611:exon11:c.G1409A:p.R470H,ENSG00000160789:ENST00000473598:exon12:c.G1448A:p.R483H	rs57830985	Pathogenic|not provided	Familial_partial_lipodystrophy_2|not_provided	RCV000015585.25|RCV000057353.1	MedGen:OMIM:Orphanet|MedGen	C1720860:151660:ORPHA2348|CN221809
1	156108328	156108328	C	G	exonic	LMNA	.	nonsynonymous SNV	LMNA:NM_170708:exon10:c.C1658G:p.S553W,LMNA:NM_001257374:exon11:c.C1412G:p.S471W,LMNA:NM_001282626:exon11:c.C1748G:p.S583W,LMNA:NM_170707:exon11:c.C1748G:p.S583W	exonic	ENSG00000160789	.	nonsynonymous SNV	ENSG00000160789:ENST00000508500:exon5:c.C536G:p.S179W,ENSG00000160789:ENST00000347559:exon10:c.C1658G:p.S553W,ENSG00000160789:ENST00000368299:exon11:c.C1748G:p.S583W,ENSG00000160789:ENST00000368300:exon11:c.C1748G:p.S583W,ENSG00000160789:ENST00000448611:exon11:c.C1412G:p.S471W,ENSG00000160789:ENST00000473598:exon12:c.C1451G:p.S484W	rs59601651	Uncertain significance	not_specified	RCV000155709.1	MedGen	CN169374
1	156108328	156108328	C	T	exonic	LMNA	.	nonsynonymous SNV	LMNA:NM_170708:exon10:c.C1658T:p.S553L,LMNA:NM_001257374:exon11:c.C1412T:p.S471L,LMNA:NM_001282626:exon11:c.C1748T:p.S583L,LMNA:NM_170707:exon11:c.C1748T:p.S583L	exonic	ENSG00000160789	.	nonsynonymous SNV	ENSG00000160789:ENST00000508500:exon5:c.C536T:p.S179L,ENSG00000160789:ENST00000347559:exon10:c.C1658T:p.S553L,ENSG00000160789:ENST00000368299:exon11:c.C1748T:p.S583L,ENSG00000160789:ENST00000368300:exon11:c.C1748T:p.S583L,ENSG00000160789:ENST00000448611:exon11:c.C1412T:p.S471L,ENSG00000160789:ENST00000473598:exon12:c.C1451T:p.S484L	rs59601651	not provided|Uncertain significance	not_provided|not_specified	RCV000057354.3|RCV000235168.2	MedGen|MedGen	CN221809|CN169374
1	156108331	156108331	G	A	exonic	LMNA	.	nonsynonymous SNV	LMNA:NM_170708:exon10:c.G1661A:p.R554H,LMNA:NM_001257374:exon11:c.G1415A:p.R472H,LMNA:NM_001282626:exon11:c.G1751A:p.R584H,LMNA:NM_170707:exon11:c.G1751A:p.R584H	exonic	ENSG00000160789	.	nonsynonymous SNV	ENSG00000160789:ENST00000508500:exon5:c.G539A:p.R180H,ENSG00000160789:ENST00000347559:exon10:c.G1661A:p.R554H,ENSG00000160789:ENST00000368299:exon11:c.G1751A:p.R584H,ENSG00000160789:ENST00000368300:exon11:c.G1751A:p.R584H,ENSG00000160789:ENST00000448611:exon11:c.G1415A:p.R472H,ENSG00000160789:ENST00000473598:exon12:c.G1454A:p.R485H	rs56657623	Uncertain significance|not provided	not_specified|not_provided	RCV000041330.2|RCV000057355.1	MedGen|MedGen	CN169374|CN221809
1	156108342	156108342	T	C	exonic	LMNA	.	nonsynonymous SNV	LMNA:NM_170708:exon10:c.T1672C:p.C558R,LMNA:NM_001257374:exon11:c.T1426C:p.C476R,LMNA:NM_001282626:exon11:c.T1762C:p.C588R,LMNA:NM_170707:exon11:c.T1762C:p.C588R	exonic	ENSG00000160789	.	nonsynonymous SNV	ENSG00000160789:ENST00000508500:exon5:c.T550C:p.C184R,ENSG00000160789:ENST00000347559:exon10:c.T1672C:p.C558R,ENSG00000160789:ENST00000368299:exon11:c.T1762C:p.C588R,ENSG00000160789:ENST00000368300:exon11:c.T1762C:p.C588R,ENSG00000160789:ENST00000448611:exon11:c.T1426C:p.C476R,ENSG00000160789:ENST00000473598:exon12:c.T1465C:p.C489R	rs267607621	not provided	not_provided	RCV000057356.1	MedGen	CN221809
1	156108351	156108351	T	A	exonic	LMNA	.	nonsynonymous SNV	LMNA:NM_170708:exon10:c.T1681A:p.C561S,LMNA:NM_001257374:exon11:c.T1435A:p.C479S,LMNA:NM_001282626:exon11:c.T1771A:p.C591S,LMNA:NM_170707:exon11:c.T1771A:p.C591S	exonic	ENSG00000160789	.	nonsynonymous SNV	ENSG00000160789:ENST00000508500:exon5:c.T559A:p.C187S,ENSG00000160789:ENST00000347559:exon10:c.T1681A:p.C561S,ENSG00000160789:ENST00000368299:exon11:c.T1771A:p.C591S,ENSG00000160789:ENST00000368300:exon11:c.T1771A:p.C591S,ENSG00000160789:ENST00000448611:exon11:c.T1435A:p.C479S,ENSG00000160789:ENST00000473598:exon12:c.T1474A:p.C492S	rs797044486	Pathogenic	Hutchinson-Gilford_syndrome	RCV000192014.1	MedGen:OMIM:Orphanet:SNOMED_CT	C0033300:176670:ORPHA740:238870004
1	156108352	156108352	G	T	exonic	LMNA	.	nonsynonymous SNV	LMNA:NM_170708:exon10:c.G1682T:p.C561F,LMNA:NM_001257374:exon11:c.G1436T:p.C479F,LMNA:NM_001282626:exon11:c.G1772T:p.C591F,LMNA:NM_170707:exon11:c.G1772T:p.C591F	exonic	ENSG00000160789	.	nonsynonymous SNV	ENSG00000160789:ENST00000508500:exon5:c.G560T:p.C187F,ENSG00000160789:ENST00000347559:exon10:c.G1682T:p.C561F,ENSG00000160789:ENST00000368299:exon11:c.G1772T:p.C591F,ENSG00000160789:ENST00000368300:exon11:c.G1772T:p.C591F,ENSG00000160789:ENST00000448611:exon11:c.G1436T:p.C479F,ENSG00000160789:ENST00000473598:exon12:c.G1475T:p.C492F	rs267607556	not provided	not_provided	RCV000057358.1	MedGen	CN221809
1	156108354	156108354	G	A	exonic	LMNA	.	nonsynonymous SNV	LMNA:NM_170708:exon10:c.G1684A:p.G562R,LMNA:NM_001257374:exon11:c.G1438A:p.G480R,LMNA:NM_001282626:exon11:c.G1774A:p.G592R,LMNA:NM_170707:exon11:c.G1774A:p.G592R	exonic	ENSG00000160789	.	nonsynonymous SNV	ENSG00000160789:ENST00000508500:exon5:c.G562A:p.G188R,ENSG00000160789:ENST00000347559:exon10:c.G1684A:p.G562R,ENSG00000160789:ENST00000368299:exon11:c.G1774A:p.G592R,ENSG00000160789:ENST00000368300:exon11:c.G1774A:p.G592R,ENSG00000160789:ENST00000448611:exon11:c.G1438A:p.G480R,ENSG00000160789:ENST00000473598:exon12:c.G1477A:p.G493R	rs786205448	Likely pathogenic|Likely pathogenic	not_provided|not_provided	RCV000171159.1|RCV000201245.1	.	.
1	156108366	156108366	G	A	exonic	LMNA	.	nonsynonymous SNV	LMNA:NM_170708:exon10:c.G1696A:p.D566N,LMNA:NM_001257374:exon11:c.G1450A:p.D484N,LMNA:NM_001282626:exon11:c.G1786A:p.D596N,LMNA:NM_170707:exon11:c.G1786A:p.D596N	exonic	ENSG00000160789	.	nonsynonymous SNV	ENSG00000160789:ENST00000508500:exon5:c.G574A:p.D192N,ENSG00000160789:ENST00000347559:exon10:c.G1696A:p.D566N,ENSG00000160789:ENST00000368299:exon11:c.G1786A:p.D596N,ENSG00000160789:ENST00000368300:exon11:c.G1786A:p.D596N,ENSG00000160789:ENST00000448611:exon11:c.G1450A:p.D484N,ENSG00000160789:ENST00000473598:exon12:c.G1489A:p.D497N	rs769561386	Pathogenic	Muscular_dystrophy	RCV000503392.1	MeSH:MedGen:Orphanet	D009136:C0026850:ORPHA98473
1	156108384	156108384	G	A	exonic	LMNA	.	nonsynonymous SNV	LMNA:NM_170708:exon10:c.G1714A:p.G572S,LMNA:NM_001257374:exon11:c.G1468A:p.G490S,LMNA:NM_001282626:exon11:c.G1804A:p.G602S,LMNA:NM_170707:exon11:c.G1804A:p.G602S	exonic	ENSG00000160789	.	nonsynonymous SNV	ENSG00000160789:ENST00000508500:exon5:c.G592A:p.G198S,ENSG00000160789:ENST00000347559:exon10:c.G1714A:p.G572S,ENSG00000160789:ENST00000368299:exon11:c.G1804A:p.G602S,ENSG00000160789:ENST00000368300:exon11:c.G1804A:p.G602S,ENSG00000160789:ENST00000448611:exon11:c.G1468A:p.G490S,ENSG00000160789:ENST00000473598:exon12:c.G1507A:p.G503S	rs60662302	other|not provided|Uncertain significance|Likely benign	not_specified|not_provided|Insulin_resistance_syndrome,_type_A|Charcot-Marie-Tooth_disease,_type_2	RCV000041334.4|RCV000057361.3|RCV000148601.1|RCV000460204.1	MedGen|MedGen|MedGen:Orphanet|MedGen	CN169374|CN221809|C0342336:ORPHA2297|CN043576
1	156108402	156108402	G	A	exonic	LMNA	.	nonsynonymous SNV	LMNA:NM_170708:exon10:c.G1732A:p.G578S,LMNA:NM_001257374:exon11:c.G1486A:p.G496S,LMNA:NM_170707:exon11:c.G1822A:p.G608S	exonic	ENSG00000160789	.	nonsynonymous SNV	ENSG00000160789:ENST00000508500:exon5:c.G610A:p.G204S,ENSG00000160789:ENST00000347559:exon10:c.G1732A:p.G578S,ENSG00000160789:ENST00000368300:exon11:c.G1822A:p.G608S,ENSG00000160789:ENST00000448611:exon11:c.G1486A:p.G496S,ENSG00000160789:ENST00000473598:exon12:c.G1525A:p.G509S	rs61064130	Pathogenic|not provided	Hutchinson-Gilford_syndrome|not_provided	RCV000015595.26|RCV000057363.1	MedGen:OMIM:Orphanet:SNOMED_CT|MedGen	C0033300:176670:ORPHA740:238870004|CN221809
1	156108405	156108405	G	A	exonic	LMNA	.	nonsynonymous SNV	LMNA:NM_170708:exon10:c.G1735A:p.G579R,LMNA:NM_001257374:exon11:c.G1489A:p.G497R,LMNA:NM_170707:exon11:c.G1825A:p.G609R	exonic	ENSG00000160789	.	nonsynonymous SNV	ENSG00000160789:ENST00000508500:exon5:c.G613A:p.G205R,ENSG00000160789:ENST00000347559:exon10:c.G1735A:p.G579R,ENSG00000160789:ENST00000368300:exon11:c.G1825A:p.G609R,ENSG00000160789:ENST00000448611:exon11:c.G1489A:p.G497R,ENSG00000160789:ENST00000473598:exon12:c.G1528A:p.G510R	rs397517898	Uncertain significance	not_specified	RCV000041335.2	MedGen	CN169374
1	156108424	156108424	C	G	exonic	LMNA	.	nonsynonymous SNV	LMNA:NM_170708:exon10:c.C1754G:p.S585C,LMNA:NM_001257374:exon11:c.C1508G:p.S503C,LMNA:NM_170707:exon11:c.C1844G:p.S615C	exonic	ENSG00000160789	.	nonsynonymous SNV	ENSG00000160789:ENST00000508500:exon5:c.C632G:p.S211C,ENSG00000160789:ENST00000347559:exon10:c.C1754G:p.S585C,ENSG00000160789:ENST00000368300:exon11:c.C1844G:p.S615C,ENSG00000160789:ENST00000448611:exon11:c.C1508G:p.S503C,ENSG00000160789:ENST00000473598:exon12:c.C1547G:p.S516C	.	Uncertain significance	not_specified	RCV000236810.1	MedGen	CN169374
1	156108447	156108447	A	G	exonic	LMNA	.	nonsynonymous SNV	LMNA:NM_170708:exon10:c.A1777G:p.T593A,LMNA:NM_001257374:exon11:c.A1531G:p.T511A,LMNA:NM_170707:exon11:c.A1867G:p.T623A	exonic	ENSG00000160789	.	nonsynonymous SNV	ENSG00000160789:ENST00000508500:exon5:c.A655G:p.T219A,ENSG00000160789:ENST00000347559:exon10:c.A1777G:p.T593A,ENSG00000160789:ENST00000368300:exon11:c.A1867G:p.T623A,ENSG00000160789:ENST00000448611:exon11:c.A1531G:p.T511A,ENSG00000160789:ENST00000473598:exon12:c.A1570G:p.T524A	rs757888891	Uncertain significance	not_specified	RCV000386992.1	MedGen	CN169374
1	156108448	156108448	C	G	exonic	LMNA	.	nonsynonymous SNV	LMNA:NM_170708:exon10:c.C1778G:p.T593S,LMNA:NM_001257374:exon11:c.C1532G:p.T511S,LMNA:NM_170707:exon11:c.C1868G:p.T623S	exonic	ENSG00000160789	.	nonsynonymous SNV	ENSG00000160789:ENST00000508500:exon5:c.C656G:p.T219S,ENSG00000160789:ENST00000347559:exon10:c.C1778G:p.T593S,ENSG00000160789:ENST00000368300:exon11:c.C1868G:p.T623S,ENSG00000160789:ENST00000448611:exon11:c.C1532G:p.T511S,ENSG00000160789:ENST00000473598:exon12:c.C1571G:p.T524S	rs59267781	not provided|Pathogenic	not_provided|Hutchinson-Gilford_syndrome	RCV000057366.1|RCV000192021.1	MedGen|MedGen:OMIM:Orphanet:SNOMED_CT	CN221809|C0033300:176670:ORPHA740:238870004
1	156108450	156108450	C	T	exonic	LMNA	.	nonsynonymous SNV	LMNA:NM_170708:exon10:c.C1780T:p.R594C,LMNA:NM_001257374:exon11:c.C1534T:p.R512C,LMNA:NM_170707:exon11:c.C1870T:p.R624C	exonic	ENSG00000160789	.	nonsynonymous SNV	ENSG00000160789:ENST00000508500:exon5:c.C658T:p.R220C,ENSG00000160789:ENST00000347559:exon10:c.C1780T:p.R594C,ENSG00000160789:ENST00000368300:exon11:c.C1870T:p.R624C,ENSG00000160789:ENST00000448611:exon11:c.C1534T:p.R512C,ENSG00000160789:ENST00000473598:exon12:c.C1573T:p.R525C	rs140455668	Uncertain significance	Charcot-Marie-Tooth_disease	RCV000148610.1	MedGen:Orphanet:SNOMED_CT	C0007959:ORPHA166:50548001
1	156108451	156108451	G	A	exonic	LMNA	.	nonsynonymous SNV	LMNA:NM_170708:exon10:c.G1781A:p.R594H,LMNA:NM_001257374:exon11:c.G1535A:p.R512H,LMNA:NM_170707:exon11:c.G1871A:p.R624H	exonic	ENSG00000160789	.	nonsynonymous SNV	ENSG00000160789:ENST00000508500:exon5:c.G659A:p.R220H,ENSG00000160789:ENST00000347559:exon10:c.G1781A:p.R594H,ENSG00000160789:ENST00000368300:exon11:c.G1871A:p.R624H,ENSG00000160789:ENST00000448611:exon11:c.G1535A:p.R512H,ENSG00000160789:ENST00000473598:exon12:c.G1574A:p.R525H	rs13768	not provided	not_provided	RCV000057367.1	MedGen	CN221809
1	156108453	156108453	A	C	exonic	LMNA	.	nonsynonymous SNV	LMNA:NM_170708:exon10:c.A1783C:p.S595R,LMNA:NM_001257374:exon11:c.A1537C:p.S513R,LMNA:NM_170707:exon11:c.A1873C:p.S625R	exonic	ENSG00000160789	.	nonsynonymous SNV	ENSG00000160789:ENST00000508500:exon5:c.A661C:p.S221R,ENSG00000160789:ENST00000347559:exon10:c.A1783C:p.S595R,ENSG00000160789:ENST00000368300:exon11:c.A1873C:p.S625R,ENSG00000160789:ENST00000448611:exon11:c.A1537C:p.S513R,ENSG00000160789:ENST00000473598:exon12:c.A1576C:p.S526R	rs398124550	Uncertain significance|Uncertain significance	not_provided|not_specified	RCV000082684.6|RCV000259074.1	MedGen|MedGen	CN221809|CN169374
1	156108454	156108454	G	C	exonic	LMNA	.	nonsynonymous SNV	LMNA:NM_170708:exon10:c.G1784C:p.S595T,LMNA:NM_001257374:exon11:c.G1538C:p.S513T,LMNA:NM_170707:exon11:c.G1874C:p.S625T	exonic	ENSG00000160789	.	nonsynonymous SNV	ENSG00000160789:ENST00000508500:exon5:c.G662C:p.S221T,ENSG00000160789:ENST00000347559:exon10:c.G1784C:p.S595T,ENSG00000160789:ENST00000368300:exon11:c.G1874C:p.S625T,ENSG00000160789:ENST00000448611:exon11:c.G1538C:p.S513T,ENSG00000160789:ENST00000473598:exon12:c.G1577C:p.S526T	rs398124551	Uncertain significance|Uncertain significance	not_provided|not_specified	RCV000082685.6|RCV000259075.1	MedGen|MedGen	CN221809|CN169374
1	156108460	156108460	G	A	exonic	LMNA	.	nonsynonymous SNV	LMNA:NM_170708:exon10:c.G1790A:p.R597H,LMNA:NM_001257374:exon11:c.G1544A:p.R515H,LMNA:NM_170707:exon11:c.G1880A:p.R627H	exonic	ENSG00000160789	.	nonsynonymous SNV	ENSG00000160789:ENST00000508500:exon5:c.G668A:p.R223H,ENSG00000160789:ENST00000347559:exon10:c.G1790A:p.R597H,ENSG00000160789:ENST00000368300:exon11:c.G1880A:p.R627H,ENSG00000160789:ENST00000448611:exon11:c.G1544A:p.R515H,ENSG00000160789:ENST00000473598:exon12:c.G1583A:p.R528H	rs745997478	Uncertain significance	not_specified	RCV000182375.1	MedGen	CN169374
1	156108472	156108472	G	A	exonic	LMNA	.	nonsynonymous SNV	LMNA:NM_170708:exon10:c.G1802A:p.G601D,LMNA:NM_001257374:exon11:c.G1556A:p.G519D,LMNA:NM_170707:exon11:c.G1892A:p.G631D	exonic	ENSG00000160789	.	nonsynonymous SNV	ENSG00000160789:ENST00000508500:exon5:c.G680A:p.G227D,ENSG00000160789:ENST00000347559:exon10:c.G1802A:p.G601D,ENSG00000160789:ENST00000368300:exon11:c.G1892A:p.G631D,ENSG00000160789:ENST00000448611:exon11:c.G1556A:p.G519D,ENSG00000160789:ENST00000473598:exon12:c.G1595A:p.G532D	rs267607648	not provided|Uncertain significance	not_provided|Metabolic_disease	RCV000057370.1|RCV000148611.1	MedGen|MedGen:SNOMED_CT	CN221809|C0025517:75934005
1	156108480	156108480	G	A	exonic	LMNA	.	nonsynonymous SNV	LMNA:NM_170708:exon10:c.G1810A:p.G604S,LMNA:NM_001257374:exon11:c.G1564A:p.G522S,LMNA:NM_170707:exon11:c.G1900A:p.G634S	exonic	ENSG00000160789	.	nonsynonymous SNV	ENSG00000160789:ENST00000508500:exon5:c.G688A:p.G230S,ENSG00000160789:ENST00000347559:exon10:c.G1810A:p.G604S,ENSG00000160789:ENST00000368300:exon11:c.G1900A:p.G634S,ENSG00000160789:ENST00000448611:exon11:c.G1564A:p.G522S,ENSG00000160789:ENST00000473598:exon12:c.G1603A:p.G535S	.	Uncertain significance	not_specified	RCV000235820.1	MedGen	CN169374
1	156108484	156108484	G	A	exonic	LMNA	.	nonsynonymous SNV	LMNA:NM_170708:exon10:c.G1814A:p.G605D,LMNA:NM_001257374:exon11:c.G1568A:p.G523D,LMNA:NM_170707:exon11:c.G1904A:p.G635D	exonic	ENSG00000160789	.	nonsynonymous SNV	ENSG00000160789:ENST00000508500:exon5:c.G692A:p.G231D,ENSG00000160789:ENST00000347559:exon10:c.G1814A:p.G605D,ENSG00000160789:ENST00000368300:exon11:c.G1904A:p.G635D,ENSG00000160789:ENST00000448611:exon11:c.G1568A:p.G523D,ENSG00000160789:ENST00000473598:exon12:c.G1607A:p.G536D	rs267607612	not provided	not_provided	RCV000057371.1	MedGen	CN221809
1	156108492	156108492	G	A	exonic	LMNA	.	nonsynonymous SNV	LMNA:NM_170708:exon10:c.G1822A:p.G608R,LMNA:NM_001257374:exon11:c.G1576A:p.G526R,LMNA:NM_170707:exon11:c.G1912A:p.G638R	exonic	ENSG00000160789	.	nonsynonymous SNV	ENSG00000160789:ENST00000508500:exon5:c.G700A:p.G234R,ENSG00000160789:ENST00000347559:exon10:c.G1822A:p.G608R,ENSG00000160789:ENST00000368300:exon11:c.G1912A:p.G638R,ENSG00000160789:ENST00000448611:exon11:c.G1576A:p.G526R,ENSG00000160789:ENST00000473598:exon12:c.G1615A:p.G539R	rs144851946	other|Likely benign	not_specified|Charcot-Marie-Tooth_disease,_type_2	RCV000041338.5|RCV000228138.1	MedGen|MedGen	CN169374|CN043576
1	156108499	156108499	A	G	exonic	LMNA	.	nonsynonymous SNV	LMNA:NM_170708:exon10:c.A1829G:p.N610S,LMNA:NM_001257374:exon11:c.A1583G:p.N528S,LMNA:NM_170707:exon11:c.A1919G:p.N640S	exonic	ENSG00000160789	.	nonsynonymous SNV	ENSG00000160789:ENST00000508500:exon5:c.A707G:p.N236S,ENSG00000160789:ENST00000347559:exon10:c.A1829G:p.N610S,ENSG00000160789:ENST00000368300:exon11:c.A1919G:p.N640S,ENSG00000160789:ENST00000448611:exon11:c.A1583G:p.N528S,ENSG00000160789:ENST00000473598:exon12:c.A1622G:p.N541S	rs752598065	Uncertain significance	not_specified	RCV000294532.1	MedGen	CN169374
1	156108510	156108510	C	A	exonic	LMNA	.	nonsynonymous SNV	LMNA:NM_170708:exon10:c.C1840A:p.R614S,LMNA:NM_001257374:exon11:c.C1594A:p.R532S,LMNA:NM_170707:exon11:c.C1930A:p.R644S	exonic	ENSG00000160789	.	nonsynonymous SNV	ENSG00000160789:ENST00000508500:exon5:c.C718A:p.R240S,ENSG00000160789:ENST00000347559:exon10:c.C1840A:p.R614S,ENSG00000160789:ENST00000368300:exon11:c.C1930A:p.R644S,ENSG00000160789:ENST00000448611:exon11:c.C1594A:p.R532S,ENSG00000160789:ENST00000473598:exon12:c.C1633A:p.R545S	rs142000963	not provided	not_provided	RCV000057373.1	MedGen	CN221809
1	156108510	156108510	C	T	exonic	LMNA	.	nonsynonymous SNV	LMNA:NM_170708:exon10:c.C1840T:p.R614C,LMNA:NM_001257374:exon11:c.C1594T:p.R532C,LMNA:NM_170707:exon11:c.C1930T:p.R644C	exonic	ENSG00000160789	.	nonsynonymous SNV	ENSG00000160789:ENST00000508500:exon5:c.C718T:p.R240C,ENSG00000160789:ENST00000347559:exon10:c.C1840T:p.R614C,ENSG00000160789:ENST00000368300:exon11:c.C1930T:p.R644C,ENSG00000160789:ENST00000448611:exon11:c.C1594T:p.R532C,ENSG00000160789:ENST00000473598:exon12:c.C1633T:p.R545C	rs142000963	Uncertain significance|other|Likely benign|Likely pathogenic|Uncertain significance|Uncertain significance|Likely benign	Variant_of_unknown_significance|not_specified|not_provided|Charcot-Marie-Tooth_disease|Primary_dilated_cardiomyopathy|Cardiovascular_phenotype|Charcot-Marie-Tooth_disease,_type_2	RCV000015626.5|RCV000041340.4|RCV000057374.4|RCV000144868.1|RCV000148602.1|RCV000245284.1|RCV000471403.1	MedGen|MedGen|MedGen:Orphanet:SNOMED_CT|MedGen:Orphanet:SNOMED_CT|MedGen|MedGen	CN169374|CN221809|C0007959:ORPHA166:50548001|C0007193:ORPHA217604:195021004|CN230736|CN043576
1	156108511	156108511	G	A	exonic	LMNA	.	nonsynonymous SNV	LMNA:NM_170708:exon10:c.G1841A:p.R614H,LMNA:NM_001257374:exon11:c.G1595A:p.R532H,LMNA:NM_170707:exon11:c.G1931A:p.R644H	exonic	ENSG00000160789	.	nonsynonymous SNV	ENSG00000160789:ENST00000508500:exon5:c.G719A:p.R240H,ENSG00000160789:ENST00000347559:exon10:c.G1841A:p.R614H,ENSG00000160789:ENST00000368300:exon11:c.G1931A:p.R644H,ENSG00000160789:ENST00000448611:exon11:c.G1595A:p.R532H,ENSG00000160789:ENST00000473598:exon12:c.G1634A:p.R545H	rs368386019	Likely benign|Uncertain significance|Uncertain significance|Uncertain significance	Congenital_muscular_dystrophy|not_specified|Charcot-Marie-Tooth_disease,_type_2|Cardiovascular_phenotype	RCV000148599.1|RCV000182377.4|RCV000231962.1|RCV000245708.1	MedGen:Orphanet:SNOMED_CT|MedGen|MedGen|MedGen	C0699743:ORPHA97242:240059009|CN169374|CN043576|CN230736
1	156108540	156108540	C	T	exonic	LMNA	.	stopgain	LMNA:NM_170708:exon10:c.C1870T:p.R624X,LMNA:NM_001257374:exon11:c.C1624T:p.R542X,LMNA:NM_170707:exon11:c.C1960T:p.R654X	exonic	ENSG00000160789	.	stopgain	ENSG00000160789:ENST00000508500:exon5:c.C748T:p.R250X,ENSG00000160789:ENST00000347559:exon10:c.C1870T:p.R624X,ENSG00000160789:ENST00000368300:exon11:c.C1960T:p.R654X,ENSG00000160789:ENST00000448611:exon11:c.C1624T:p.R542X,ENSG00000160789:ENST00000473598:exon12:c.C1663T:p.R555X	rs267607544	not provided	not_provided	RCV000057375.1	MedGen	CN221809
19	1612356	1612356	C	T	exonic;exonic	TCF3	.	nonsynonymous SNV;nonsynonymous SNV	TCF3:NM_001136139:exon17:c.G1663A:p.E555K;TCF3:NM_001136139:exon17:c.G1663A:p.E555K	exonic;exonic	ENSG00000071564	.	nonsynonymous SNV;nonsynonymous SNV	ENSG00000071564:ENST00000585731:exon2:c.G133A:p.E45K,ENSG00000071564:ENST00000590684:exon2:c.G187A:p.E63K,ENSG00000071564:ENST00000453954:exon14:c.G1408A:p.E470K,ENSG00000071564:ENST00000588136:exon17:c.G1663A:p.E555K,ENSG00000071564:ENST00000344749:exon18:c.G1663A:p.E555K;ENSG00000071564:ENST00000585731:exon2:c.G133A:p.E45K,ENSG00000071564:ENST00000590684:exon2:c.G187A:p.E63K,ENSG00000071564:ENS…	.	Pathogenic	Agammaglobulinemia_8,_autosomal_dominant	RCV000211091.2	MedGen:OMIM	C4310786:616941
1	197069577	197069577	C	T	exonic	ASPM	.	nonsynonymous SNV	ASPM:NM_018136:exon18:c.G8804A:p.S2935N	exonic	ENSG00000066279	.	nonsynonymous SNV	ENSG00000066279:ENST00000367409:exon18:c.G8804A:p.S2935N	.	Uncertain significance	Primary_Microcephaly,_Recessive	RCV000362120.1	MedGen	CN239428
1	197069624	197069624	T	A	exonic	ASPM	.	nonsynonymous SNV	ASPM:NM_018136:exon18:c.A8757T:p.R2919S	exonic	ENSG00000066279	.	nonsynonymous SNV	ENSG00000066279:ENST00000367409:exon18:c.A8757T:p.R2919S	rs751097660	Likely benign	not_specified	RCV000442630.1	MedGen	CN169374
1	197069640	197069640	A	G	exonic	ASPM	.	nonsynonymous SNV	ASPM:NM_018136:exon18:c.T8741C:p.I2914T	exonic	ENSG00000066279	.	nonsynonymous SNV	ENSG00000066279:ENST00000367409:exon18:c.T8741C:p.I2914T	rs200856894	Uncertain significance|Uncertain significance	Primary_autosomal_recessive_microcephaly_5|Primary_Microcephaly,_Recessive	RCV000145220.1|RCV000267581.1	MedGen:OMIM|MedGen	C1837501:608716|CN239428
1	197069677	197069677	G	A	exonic	ASPM	.	stopgain	ASPM:NM_018136:exon18:c.C8704T:p.Q2902X	exonic	ENSG00000066279	.	stopgain	ENSG00000066279:ENST00000367409:exon18:c.C8704T:p.Q2902X	rs587783282	Pathogenic	Primary_autosomal_recessive_microcephaly_5	RCV000145218.1	MedGen:OMIM	C1837501:608716
1	197069698	197069698	C	T	exonic	ASPM	.	nonsynonymous SNV	ASPM:NM_018136:exon18:c.G8683A:p.A2895T	exonic	ENSG00000066279	.	nonsynonymous SNV	ENSG00000066279:ENST00000367409:exon18:c.G8683A:p.A2895T	rs775263946	Uncertain significance	not_specified	RCV000193770.2	MedGen	CN169374
1	197069713	197069713	G	A	exonic	ASPM	.	stopgain	ASPM:NM_018136:exon18:c.C8668T:p.Q2890X	exonic	ENSG00000066279	.	stopgain	ENSG00000066279:ENST00000367409:exon18:c.C8668T:p.Q2890X	rs199422181	Pathogenic	Primary_autosomal_recessive_microcephaly_5	RCV000020808.1	MedGen:OMIM	C1837501:608716
1	197069823	197069823	C	T	exonic	ASPM	.	nonsynonymous SNV	ASPM:NM_018136:exon18:c.G8558A:p.R2853Q	exonic	ENSG00000066279	.	nonsynonymous SNV	ENSG00000066279:ENST00000367409:exon18:c.G8558A:p.R2853Q	rs148245202	Uncertain significance	Primary_autosomal_recessive_microcephaly_5	RCV000194024.1	MedGen:OMIM	C1837501:608716
1	197069824	197069824	G	A	exonic	ASPM	.	nonsynonymous SNV	ASPM:NM_018136:exon18:c.C8557T:p.R2853W	exonic	ENSG00000066279	.	nonsynonymous SNV	ENSG00000066279:ENST00000367409:exon18:c.C8557T:p.R2853W	rs150424130	Uncertain significance	not_specified	RCV000503449.1	MedGen	CN169374
1	197069857	197069857	G	A	exonic	ASPM	.	nonsynonymous SNV	ASPM:NM_018136:exon18:c.C8524T:p.R2842W	exonic	ENSG00000066279	.	nonsynonymous SNV	ENSG00000066279:ENST00000367409:exon18:c.C8524T:p.R2842W	rs112946633	Uncertain significance	Primary_autosomal_recessive_microcephaly_5	RCV000145217.1	MedGen:OMIM	C1837501:608716
1	197069898	197069898	A	G	exonic	ASPM	.	nonsynonymous SNV	ASPM:NM_018136:exon18:c.T8483C:p.M2828T	exonic	ENSG00000066279	.	nonsynonymous SNV	ENSG00000066279:ENST00000367409:exon18:c.T8483C:p.M2828T	.	Uncertain significance	not_specified	RCV000274347.1	MedGen	CN169374
1	197069932	197069932	C	A	exonic	ASPM	.	nonsynonymous SNV	ASPM:NM_018136:exon18:c.G8449T:p.A2817S	exonic	ENSG00000066279	.	nonsynonymous SNV	ENSG00000066279:ENST00000367409:exon18:c.G8449T:p.A2817S	rs117963393	Uncertain significance|Uncertain significance	Primary_autosomal_recessive_microcephaly_5|Primary_Microcephaly,_Recessive	RCV000145213.1|RCV000320008.1	MedGen:OMIM|MedGen	C1837501:608716|CN239428
1	197070010	197070010	C	T	exonic	ASPM	.	nonsynonymous SNV	ASPM:NM_018136:exon18:c.G8371A:p.G2791S	exonic	ENSG00000066279	.	nonsynonymous SNV	ENSG00000066279:ENST00000367409:exon18:c.G8371A:p.G2791S	.	Uncertain significance	not_specified	RCV000442704.1	MedGen	CN169374
1	197070072	197070072	A	C	exonic	ASPM	.	nonsynonymous SNV	ASPM:NM_018136:exon18:c.T8309G:p.V2770G	exonic	ENSG00000066279	.	nonsynonymous SNV	ENSG00000066279:ENST00000367409:exon18:c.T8309G:p.V2770G	.	other	not_specified	RCV000379254.2	MedGen	CN169374
1	197070087	197070087	T	G	exonic	ASPM	.	nonsynonymous SNV	ASPM:NM_018136:exon18:c.A8294C:p.K2765T	exonic	ENSG00000066279	.	nonsynonymous SNV	ENSG00000066279:ENST00000367409:exon18:c.A8294C:p.K2765T	.	Uncertain significance	Primary_Microcephaly,_Recessive	RCV000374612.1	MedGen	CN239428
1	197070090	197070090	T	C	exonic	ASPM	.	nonsynonymous SNV	ASPM:NM_018136:exon18:c.A8291G:p.E2764G	exonic	ENSG00000066279	.	nonsynonymous SNV	ENSG00000066279:ENST00000367409:exon18:c.A8291G:p.E2764G	rs587783279	Uncertain significance	Primary_autosomal_recessive_microcephaly_5	RCV000145212.1	MedGen:OMIM	C1837501:608716
1	197070108	197070108	A	T	exonic	ASPM	.	stopgain	ASPM:NM_018136:exon18:c.T8273A:p.L2758X	exonic	ENSG00000066279	.	stopgain	ENSG00000066279:ENST00000367409:exon18:c.T8273A:p.L2758X	rs199422178	Pathogenic	Primary_autosomal_recessive_microcephaly_5	RCV000020804.1	MedGen:OMIM	C1837501:608716
1	197070126	197070126	A	C	exonic	ASPM	.	nonsynonymous SNV	ASPM:NM_018136:exon18:c.T8255G:p.M2752R	exonic	ENSG00000066279	.	nonsynonymous SNV	ENSG00000066279:ENST00000367409:exon18:c.T8255G:p.M2752R	rs148328539	Likely benign	not_specified	RCV000222163.2	MedGen	CN169374
1	197070153	197070153	C	T	exonic	ASPM	.	nonsynonymous SNV	ASPM:NM_018136:exon18:c.G8228A:p.R2743Q	exonic	ENSG00000066279	.	nonsynonymous SNV	ENSG00000066279:ENST00000367409:exon18:c.G8228A:p.R2743Q	rs202193200	Uncertain significance	not_specified	RCV000175350.1	MedGen	CN169374
1	197070178	197070178	A	C	exonic	ASPM	.	nonsynonymous SNV	ASPM:NM_018136:exon18:c.T8203G:p.F2735V	exonic	ENSG00000066279	.	nonsynonymous SNV	ENSG00000066279:ENST00000367409:exon18:c.T8203G:p.F2735V	rs372416792	Uncertain significance|Uncertain significance	Primary_autosomal_recessive_microcephaly_5|Primary_Microcephaly,_Recessive	RCV000145211.1|RCV000280307.1	MedGen:OMIM|MedGen	C1837501:608716|CN239428
1	197070257	197070257	A	C	exonic	ASPM	.	stopgain	ASPM:NM_018136:exon18:c.T8124G:p.Y2708X	exonic	ENSG00000066279	.	stopgain	ENSG00000066279:ENST00000367409:exon18:c.T8124G:p.Y2708X	.	Pathogenic	not_provided	RCV000213452.1	MedGen	CN221809
1	197070283	197070283	G	A	exonic	ASPM	.	stopgain	ASPM:NM_018136:exon18:c.C8098T:p.R2700X	exonic	ENSG00000066279	.	stopgain	ENSG00000066279:ENST00000367409:exon18:c.C8098T:p.R2700X	rs730882076	Pathogenic	Primary_autosomal_recessive_microcephaly_5	RCV000162061.1	MedGen:OMIM	C1837501:608716
1	197070313	197070313	G	A	exonic	ASPM	.	nonsynonymous SNV	ASPM:NM_018136:exon18:c.C8068T:p.R2690W	exonic	ENSG00000066279	.	nonsynonymous SNV	ENSG00000066279:ENST00000367409:exon18:c.C8068T:p.R2690W	rs41302133	Uncertain significance	not_specified	RCV000175349.2	MedGen	CN169374
1	197070364	197070364	G	A	exonic	ASPM	.	stopgain	ASPM:NM_018136:exon18:c.C8017T:p.Q2673X	exonic	ENSG00000066279	.	stopgain	ENSG00000066279:ENST00000367409:exon18:c.C8017T:p.Q2673X	rs587783275	Pathogenic	Primary_autosomal_recessive_microcephaly_5	RCV000145206.1	MedGen:OMIM	C1837501:608716
1	197070372	197070372	A	G	exonic	ASPM	.	nonsynonymous SNV	ASPM:NM_018136:exon18:c.T8009C:p.I2670T	exonic	ENSG00000066279	.	nonsynonymous SNV	ENSG00000066279:ENST00000367409:exon18:c.T8009C:p.I2670T	rs41299627	Uncertain significance	Primary_autosomal_recessive_microcephaly_5	RCV000145205.1	MedGen:OMIM	C1837501:608716
1	197070399	197070399	A	C	exonic	ASPM	.	nonsynonymous SNV	ASPM:NM_018136:exon18:c.T7982G:p.L2661R	exonic	ENSG00000066279	.	nonsynonymous SNV	ENSG00000066279:ENST00000367409:exon18:c.T7982G:p.L2661R	rs752132953	Uncertain significance	not_specified	RCV000175342.1	MedGen	CN169374
1	197070405	197070405	C	T	exonic	ASPM	.	nonsynonymous SNV	ASPM:NM_018136:exon18:c.G7976A:p.R2659K	exonic	ENSG00000066279	.	nonsynonymous SNV	ENSG00000066279:ENST00000367409:exon18:c.G7976A:p.R2659K	.	Uncertain significance	Primary_Microcephaly,_Recessive	RCV000389834.1	MedGen	CN239428
1	197070442	197070442	G	T	exonic	ASPM	.	nonsynonymous SNV	ASPM:NM_018136:exon18:c.C7939A:p.L2647I	exonic	ENSG00000066279	.	nonsynonymous SNV	ENSG00000066279:ENST00000367409:exon18:c.C7939A:p.L2647I	rs3762271	Benign|Benign|Benign	Primary_autosomal_recessive_microcephaly_5|not_specified|Primary_Microcephaly,_Recessive	RCV000020801.1|RCV000145204.2|RCV000295618.1	MedGen:OMIM|MedGen|MedGen	C1837501:608716|CN169374|CN239428
1	197070487	197070487	G	A	exonic	ASPM	.	stopgain	ASPM:NM_018136:exon18:c.C7894T:p.Q2632X	exonic	ENSG00000066279	.	stopgain	ENSG00000066279:ENST00000367409:exon18:c.C7894T:p.Q2632X	rs199422175	Pathogenic	Primary_autosomal_recessive_microcephaly_5	RCV000020800.1	MedGen:OMIM	C1837501:608716
1	197070521	197070521	C	G	exonic	ASPM	.	nonsynonymous SNV	ASPM:NM_018136:exon18:c.G7860C:p.Q2620H	exonic	ENSG00000066279	.	nonsynonymous SNV	ENSG00000066279:ENST00000367409:exon18:c.G7860C:p.Q2620H	rs12138336	Benign|Benign|Likely benign	Primary_autosomal_recessive_microcephaly_5|not_specified|Primary_Microcephaly,_Recessive	RCV000020799.1|RCV000145202.3|RCV000291643.1	MedGen:OMIM|MedGen|MedGen	C1837501:608716|CN169374|CN239428
1	197070523	197070523	G	T	exonic	ASPM	.	nonsynonymous SNV	ASPM:NM_018136:exon18:c.C7858A:p.Q2620K	exonic	ENSG00000066279	.	nonsynonymous SNV	ENSG00000066279:ENST00000367409:exon18:c.C7858A:p.Q2620K	rs587783274	Likely benign	not_specified	RCV000145201.1	MedGen	CN169374
1	197070528	197070528	T	C	exonic	ASPM	.	nonsynonymous SNV	ASPM:NM_018136:exon18:c.A7853G:p.K2618R	exonic	ENSG00000066279	.	nonsynonymous SNV	ENSG00000066279:ENST00000367409:exon18:c.A7853G:p.K2618R	.	Uncertain significance	Primary_Microcephaly,_Recessive	RCV000346579.1	MedGen	CN239428
1	197070540	197070540	T	C	exonic	ASPM	.	nonsynonymous SNV	ASPM:NM_018136:exon18:c.A7841G:p.D2614G	exonic	ENSG00000066279	.	nonsynonymous SNV	ENSG00000066279:ENST00000367409:exon18:c.A7841G:p.D2614G	rs587783273	Uncertain significance	Primary_autosomal_recessive_microcephaly_5	RCV000145200.1	MedGen:OMIM	C1837501:608716
1	197070556	197070556	G	A	exonic	ASPM	.	stopgain	ASPM:NM_018136:exon18:c.C7825T:p.Q2609X	exonic	ENSG00000066279	.	stopgain	ENSG00000066279:ENST00000367409:exon18:c.C7825T:p.Q2609X	rs587783272	Pathogenic	Primary_autosomal_recessive_microcephaly_5	RCV000145199.1	MedGen:OMIM	C1837501:608716
1	197070564	197070564	G	T	exonic	ASPM	.	nonsynonymous SNV	ASPM:NM_018136:exon18:c.C7817A:p.T2606N	exonic	ENSG00000066279	.	nonsynonymous SNV	ENSG00000066279:ENST00000367409:exon18:c.C7817A:p.T2606N	rs587783271	Likely benign	not_specified	RCV000145198.1	MedGen	CN169374
1	197070594	197070594	A	G	exonic	ASPM	.	nonsynonymous SNV	ASPM:NM_018136:exon18:c.T7787C:p.V2596A	exonic	ENSG00000066279	.	nonsynonymous SNV	ENSG00000066279:ENST00000367409:exon18:c.T7787C:p.V2596A	rs79572771	Benign|Likely benign	not_specified|Primary_Microcephaly,_Recessive	RCV000145197.2|RCV000393841.1	MedGen|MedGen	CN169374|CN239428
1	197070620	197070620	A	C	exonic	ASPM	.	stopgain	ASPM:NM_018136:exon18:c.T7761G:p.Y2587X	exonic	ENSG00000066279	.	stopgain	ENSG00000066279:ENST00000367409:exon18:c.T7761G:p.Y2587X	rs189678019	Pathogenic	Primary_autosomal_recessive_microcephaly_5	RCV000005246.3	MedGen:OMIM	C1837501:608716
1	197070624	197070624	T	C	exonic	ASPM	.	nonsynonymous SNV	ASPM:NM_018136:exon18:c.A7757G:p.K2586R	exonic	ENSG00000066279	.	nonsynonymous SNV	ENSG00000066279:ENST00000367409:exon18:c.A7757G:p.K2586R	.	Uncertain significance	Primary_Microcephaly,_Recessive	RCV000307206.1	MedGen	CN239428
1	197070697	197070697	T	C	exonic	ASPM	.	nonsynonymous SNV	ASPM:NM_018136:exon18:c.A7684G:p.S2562G	exonic	ENSG00000066279	.	nonsynonymous SNV	ENSG00000066279:ENST00000367409:exon18:c.A7684G:p.S2562G	rs41310927	Benign|Benign|Benign	Primary_autosomal_recessive_microcephaly_5|not_specified|Primary_Microcephaly,_Recessive	RCV000020795.1|RCV000145195.2|RCV000361880.1	MedGen:OMIM|MedGen|MedGen	C1837501:608716|CN169374|CN239428
1	197070711	197070711	G	C	exonic	ASPM	.	nonsynonymous SNV	ASPM:NM_018136:exon18:c.C7670G:p.S2557C	exonic	ENSG00000066279	.	nonsynonymous SNV	ENSG00000066279:ENST00000367409:exon18:c.C7670G:p.S2557C	rs78215018	Uncertain significance|Uncertain significance|Uncertain significance	Primary_autosomal_recessive_microcephaly_5|not_specified|Primary_Microcephaly,_Recessive	RCV000145192.1|RCV000217014.1|RCV000301756.1	MedGen:OMIM|MedGen|MedGen	C1837501:608716|CN169374|CN239428
1	197070769	197070769	G	A	exonic	ASPM	.	stopgain	ASPM:NM_018136:exon18:c.C7612T:p.Q2538X	exonic	ENSG00000066279	.	stopgain	ENSG00000066279:ENST00000367409:exon18:c.C7612T:p.Q2538X	rs587783268	Pathogenic	Primary_autosomal_recessive_microcephaly_5	RCV000145190.1	MedGen:OMIM	C1837501:608716
1	197070805	197070805	T	C	exonic	ASPM	.	nonsynonymous SNV	ASPM:NM_018136:exon18:c.A7576G:p.N2526D	exonic	ENSG00000066279	.	nonsynonymous SNV	ENSG00000066279:ENST00000367409:exon18:c.A7576G:p.N2526D	rs587783267	Benign	not_specified	RCV000145188.1	MedGen	CN169374
1	197070816	197070816	A	C	exonic	ASPM	.	stopgain	ASPM:NM_018136:exon18:c.T7565G:p.L2522X	exonic	ENSG00000066279	.	stopgain	ENSG00000066279:ENST00000367409:exon18:c.T7565G:p.L2522X	rs62624965	Benign	not_specified	RCV000145186.2	MedGen	CN169374
1	197070901	197070901	A	G	exonic	ASPM	.	nonsynonymous SNV	ASPM:NM_018136:exon18:c.T7480C:p.Y2494H	exonic	ENSG00000066279	.	nonsynonymous SNV	ENSG00000066279:ENST00000367409:exon18:c.T7480C:p.Y2494H	rs964201	Benign|Benign|Benign	Primary_autosomal_recessive_microcephaly_5|not_specified|Primary_Microcephaly,_Recessive	RCV000020789.1|RCV000145183.6|RCV000332016.1	MedGen:OMIM|MedGen|MedGen	C1837501:608716|CN169374|CN239428
1	197070906	197070906	C	T	exonic	ASPM	.	nonsynonymous SNV	ASPM:NM_018136:exon18:c.G7475A:p.R2492K	exonic	ENSG00000066279	.	nonsynonymous SNV	ENSG00000066279:ENST00000367409:exon18:c.G7475A:p.R2492K	rs118010078	other|Uncertain significance	not_specified|Primary_Microcephaly,_Recessive	RCV000175351.2|RCV000386579.1	MedGen|MedGen	CN169374|CN239428
1	197070953	197070953	C	A	exonic	ASPM	.	nonsynonymous SNV	ASPM:NM_018136:exon18:c.G7428T:p.K2476N	exonic	ENSG00000066279	.	nonsynonymous SNV	ENSG00000066279:ENST00000367409:exon18:c.G7428T:p.K2476N	rs200654820	Uncertain significance|Uncertain significance	Primary_autosomal_recessive_microcephaly_5|Primary_Microcephaly,_Recessive	RCV000145182.1|RCV000292559.1	MedGen:OMIM|MedGen	C1837501:608716|CN239428
1	197070955	197070955	T	C	exonic	ASPM	.	nonsynonymous SNV	ASPM:NM_018136:exon18:c.A7426G:p.K2476E	exonic	ENSG00000066279	.	nonsynonymous SNV	ENSG00000066279:ENST00000367409:exon18:c.A7426G:p.K2476E	rs539679809	Uncertain significance	not_specified	RCV000222257.1	MedGen	CN169374
1	197071009	197071009	T	C	exonic	ASPM	.	nonsynonymous SNV	ASPM:NM_018136:exon18:c.A7372G:p.R2458G	exonic	ENSG00000066279	.	nonsynonymous SNV	ENSG00000066279:ENST00000367409:exon18:c.A7372G:p.R2458G	rs560411441	Uncertain significance	Primary_Microcephaly,_Recessive	RCV000328786.1	MedGen	CN239428
1	197071275	197071275	T	G	exonic	ASPM	.	nonsynonymous SNV	ASPM:NM_018136:exon18:c.A7106C:p.Q2369P	exonic	ENSG00000066279	.	nonsynonymous SNV	ENSG00000066279:ENST00000367409:exon18:c.A7106C:p.Q2369P	rs372076208	Likely benign	not_specified	RCV000421073.1	MedGen	CN169374
1	197071379	197071379	C	A	exonic	ASPM	.	nonsynonymous SNV	ASPM:NM_018136:exon18:c.G7002T:p.M2334I	exonic	ENSG00000066279	.	nonsynonymous SNV	ENSG00000066279:ENST00000367409:exon18:c.G7002T:p.M2334I	rs764918001	Uncertain significance	not_specified	RCV000287233.1	MedGen	CN169374
1	197071416	197071416	T	G	exonic	ASPM	.	nonsynonymous SNV	ASPM:NM_018136:exon18:c.A6965C:p.Y2322S	exonic	ENSG00000066279	.	nonsynonymous SNV	ENSG00000066279:ENST00000367409:exon18:c.A6965C:p.Y2322S	.	Uncertain significance	Primary_Microcephaly,_Recessive	RCV000344105.1	MedGen	CN239428
1	197071538	197071538	T	A	exonic	ASPM	.	nonsynonymous SNV	ASPM:NM_018136:exon18:c.A6843T:p.R2281S	exonic	ENSG00000066279	.	nonsynonymous SNV	ENSG00000066279:ENST00000367409:exon18:c.A6843T:p.R2281S	rs749279060	Uncertain significance	Primary_Microcephaly,_Recessive	RCV000285661.1	MedGen	CN239428
1	197071568	197071568	C	G	exonic	ASPM	.	nonsynonymous SNV	ASPM:NM_018136:exon18:c.G6813C:p.R2271S	exonic	ENSG00000066279	.	nonsynonymous SNV	ENSG00000066279:ENST00000367409:exon18:c.G6813C:p.R2271S	.	Likely benign	not_specified	RCV000436312.1	MedGen	CN169374
1	197071645	197071645	T	C	exonic	ASPM	.	nonsynonymous SNV	ASPM:NM_018136:exon18:c.A6736G:p.I2246V	exonic	ENSG00000066279	.	nonsynonymous SNV	ENSG00000066279:ENST00000367409:exon18:c.A6736G:p.I2246V	.	Uncertain significance	Primary_Microcephaly,_Recessive	RCV000340582.1	MedGen	CN239428
1	197071654	197071654	C	A	exonic	ASPM	.	nonsynonymous SNV	ASPM:NM_018136:exon18:c.G6727T:p.V2243L	exonic	ENSG00000066279	.	nonsynonymous SNV	ENSG00000066279:ENST00000367409:exon18:c.G6727T:p.V2243L	rs148425392	other|Likely benign	not_specified|not_provided	RCV000145170.2|RCV000224688.1	MedGen|MedGen	CN169374|CN221809
1	197071665	197071665	A	G	exonic	ASPM	.	nonsynonymous SNV	ASPM:NM_018136:exon18:c.T6716C:p.L2239P	exonic	ENSG00000066279	.	nonsynonymous SNV	ENSG00000066279:ENST00000367409:exon18:c.T6716C:p.L2239P	rs548708212	Uncertain significance	Primary_Microcephaly,_Recessive	RCV000393040.1	MedGen	CN239428
1	197071670	197071670	G	T	exonic	ASPM	.	nonsynonymous SNV	ASPM:NM_018136:exon18:c.C6711A:p.N2237K	exonic	ENSG00000066279	.	nonsynonymous SNV	ENSG00000066279:ENST00000367409:exon18:c.C6711A:p.N2237K	.	Uncertain significance	Primary_Microcephaly,_Recessive	RCV000301005.1	MedGen	CN239428
1	197071695	197071695	C	G	exonic	ASPM	.	nonsynonymous SNV	ASPM:NM_018136:exon18:c.G6686C:p.R2229T	exonic	ENSG00000066279	.	nonsynonymous SNV	ENSG00000066279:ENST00000367409:exon18:c.G6686C:p.R2229T	rs745714332	Uncertain significance	not_specified	RCV000430195.1	MedGen	CN169374
1	197071830	197071830	C	T	exonic	ASPM	.	nonsynonymous SNV	ASPM:NM_018136:exon18:c.G6551A:p.R2184Q	exonic	ENSG00000066279	.	nonsynonymous SNV	ENSG00000066279:ENST00000367409:exon18:c.G6551A:p.R2184Q	rs200848981	Uncertain significance|Likely benign	Primary_Microcephaly,_Recessive|not_specified	RCV000355862.1|RCV000439678.1	MedGen|MedGen	CN239428|CN169374
1	197071867	197071867	C	T	exonic	ASPM	.	nonsynonymous SNV	ASPM:NM_018136:exon18:c.G6514A:p.V2172I	exonic	ENSG00000066279	.	nonsynonymous SNV	ENSG00000066279:ENST00000367409:exon18:c.G6514A:p.V2172I	rs370590014	Likely benign	not_specified	RCV000424922.1	MedGen	CN169374
1	197072047	197072047	G	A	exonic	ASPM	.	nonsynonymous SNV	ASPM:NM_018136:exon18:c.C6334T:p.H2112Y	exonic	ENSG00000066279	.	nonsynonymous SNV	ENSG00000066279:ENST00000367409:exon18:c.C6334T:p.H2112Y	rs587783257	Uncertain significance	Primary_autosomal_recessive_microcephaly_5	RCV000145165.1	MedGen:OMIM	C1837501:608716
1	197072106	197072106	T	A	exonic	ASPM	.	nonsynonymous SNV	ASPM:NM_018136:exon18:c.A6275T:p.N2092I	exonic	ENSG00000066279	.	nonsynonymous SNV	ENSG00000066279:ENST00000367409:exon18:c.A6275T:p.N2092I	rs144574871	Uncertain significance	not_specified	RCV000213687.1	MedGen	CN169374
1	197072140	197072140	T	C	exonic	ASPM	.	nonsynonymous SNV	ASPM:NM_018136:exon18:c.A6241G:p.K2081E	exonic	ENSG00000066279	.	nonsynonymous SNV	ENSG00000066279:ENST00000367409:exon18:c.A6241G:p.K2081E	rs587783256	Likely benign	not_specified	RCV000145164.1	MedGen	CN169374
1	197072149	197072149	G	A	exonic	ASPM	.	stopgain	ASPM:NM_018136:exon18:c.C6232T:p.R2078X	exonic	ENSG00000066279	.	stopgain	ENSG00000066279:ENST00000367409:exon18:c.C6232T:p.R2078X	rs199422168	Pathogenic	Primary_autosomal_recessive_microcephaly_5	RCV000020784.1	MedGen:OMIM	C1837501:608716
1	197072192	197072192	A	C	exonic	ASPM	.	stopgain	ASPM:NM_018136:exon18:c.T6189G:p.Y2063X	exonic	ENSG00000066279	.	stopgain	ENSG00000066279:ENST00000367409:exon18:c.T6189G:p.Y2063X	rs137852997	Pathogenic	Primary_autosomal_recessive_microcephaly_5	RCV000005251.4	MedGen:OMIM	C1837501:608716
1	197072250	197072250	T	C	exonic	ASPM	.	nonsynonymous SNV	ASPM:NM_018136:exon18:c.A6131G:p.N2044S	exonic	ENSG00000066279	.	nonsynonymous SNV	ENSG00000066279:ENST00000367409:exon18:c.A6131G:p.N2044S	rs145645602	Uncertain significance|Uncertain significance	Primary_autosomal_recessive_microcephaly_5|Primary_Microcephaly,_Recessive	RCV000145163.1|RCV000393047.1	MedGen:OMIM|MedGen	C1837501:608716|CN239428
1	197072256	197072256	T	C	exonic	ASPM	.	nonsynonymous SNV	ASPM:NM_018136:exon18:c.A6125G:p.D2042G	exonic	ENSG00000066279	.	nonsynonymous SNV	ENSG00000066279:ENST00000367409:exon18:c.A6125G:p.D2042G	rs150327858	Uncertain significance|Likely benign	Primary_autosomal_recessive_microcephaly_5|not_specified	RCV000145162.1|RCV000175343.3	MedGen:OMIM|MedGen	C1837501:608716|CN169374
1	197072274	197072274	A	C	exonic	ASPM	.	nonsynonymous SNV	ASPM:NM_018136:exon18:c.T6107G:p.V2036G	exonic	ENSG00000066279	.	nonsynonymous SNV	ENSG00000066279:ENST00000367409:exon18:c.T6107G:p.V2036G	rs763984813	Uncertain significance|Uncertain significance	not_specified|Primary_Microcephaly,_Recessive	RCV000219967.2|RCV000298418.1	MedGen|MedGen	CN169374|CN239428
1	197072323	197072323	T	C	exonic	ASPM	.	nonsynonymous SNV	ASPM:NM_018136:exon18:c.A6058G:p.T2020A	exonic	ENSG00000066279	.	nonsynonymous SNV	ENSG00000066279:ENST00000367409:exon18:c.A6058G:p.T2020A	rs587783253	Uncertain significance	Primary_autosomal_recessive_microcephaly_5	RCV000145159.1	MedGen:OMIM	C1837501:608716
1	197072391	197072391	G	A	exonic	ASPM	.	nonsynonymous SNV	ASPM:NM_018136:exon18:c.C5990T:p.A1997V	exonic	ENSG00000066279	.	nonsynonymous SNV	ENSG00000066279:ENST00000367409:exon18:c.C5990T:p.A1997V	rs767318099	Uncertain significance	not_specified	RCV000438128.1	MedGen	CN169374
1	197072434	197072434	T	A	exonic	ASPM	.	nonsynonymous SNV	ASPM:NM_018136:exon18:c.A5947T:p.M1983L	exonic	ENSG00000066279	.	nonsynonymous SNV	ENSG00000066279:ENST00000367409:exon18:c.A5947T:p.M1983L	rs141715950	Uncertain significance|Uncertain significance	Primary_autosomal_recessive_microcephaly_5|not_specified	RCV000145155.2|RCV000195047.3	MedGen:OMIM|MedGen	C1837501:608716|CN169374
1	197072442	197072442	T	C	exonic	ASPM	.	nonsynonymous SNV	ASPM:NM_018136:exon18:c.A5939G:p.Y1980C	exonic	ENSG00000066279	.	nonsynonymous SNV	ENSG00000066279:ENST00000367409:exon18:c.A5939G:p.Y1980C	rs769860568	Uncertain significance	not_specified	RCV000259264.1	MedGen	CN169374
1	197072458	197072458	T	C	exonic	ASPM	.	nonsynonymous SNV	ASPM:NM_018136:exon18:c.A5923G:p.I1975V	exonic	ENSG00000066279	.	nonsynonymous SNV	ENSG00000066279:ENST00000367409:exon18:c.A5923G:p.I1975V	rs548744621	Uncertain significance	Primary_autosomal_recessive_microcephaly_5	RCV000145154.1	MedGen:OMIM	C1837501:608716
1	197072535	197072535	T	C	exonic	ASPM	.	nonsynonymous SNV	ASPM:NM_018136:exon18:c.A5846G:p.H1949R	exonic	ENSG00000066279	.	nonsynonymous SNV	ENSG00000066279:ENST00000367409:exon18:c.A5846G:p.H1949R	rs186663906	Uncertain significance|Uncertain significance	Primary_autosomal_recessive_microcephaly_5|Primary_Microcephaly,_Recessive	RCV000145153.1|RCV000329933.1	MedGen:OMIM|MedGen	C1837501:608716|CN239428
1	197072548	197072548	T	C	exonic	ASPM	.	nonsynonymous SNV	ASPM:NM_018136:exon18:c.A5833G:p.I1945V	exonic	ENSG00000066279	.	nonsynonymous SNV	ENSG00000066279:ENST00000367409:exon18:c.A5833G:p.I1945V	rs147466865	Uncertain significance|Uncertain significance	not_specified|Primary_Microcephaly,_Recessive	RCV000175346.1|RCV000368140.1	MedGen|MedGen	CN169374|CN239428
1	197072560	197072560	A	G	exonic	ASPM	.	nonsynonymous SNV	ASPM:NM_018136:exon18:c.T5821C:p.C1941R	exonic	ENSG00000066279	.	nonsynonymous SNV	ENSG00000066279:ENST00000367409:exon18:c.T5821C:p.C1941R	rs61249253	Benign|Likely benign	not_specified|Primary_Microcephaly,_Recessive	RCV000145152.2|RCV000271165.1	MedGen|MedGen	CN169374|CN239428
1	197072563	197072563	G	C	exonic	ASPM	.	nonsynonymous SNV	ASPM:NM_018136:exon18:c.C5818G:p.Q1940E	exonic	ENSG00000066279	.	nonsynonymous SNV	ENSG00000066279:ENST00000367409:exon18:c.C5818G:p.Q1940E	rs142378871	Uncertain significance|Uncertain significance	Inborn_genetic_diseases|Primary_Microcephaly,_Recessive	RCV000210715.1|RCV000328675.1	MeSH:MedGen|MedGen	D030342:C0950123|CN239428
1	197072639	197072639	C	A	exonic	ASPM	.	nonsynonymous SNV	ASPM:NM_018136:exon18:c.G5742T:p.Q1914H	exonic	ENSG00000066279	.	nonsynonymous SNV	ENSG00000066279:ENST00000367409:exon18:c.G5742T:p.Q1914H	.	Uncertain significance	Primary_Microcephaly,_Recessive	RCV000380931.1	MedGen	CN239428
1	197072640	197072640	T	C	exonic	ASPM	.	nonsynonymous SNV	ASPM:NM_018136:exon18:c.A5741G:p.Q1914R	exonic	ENSG00000066279	.	nonsynonymous SNV	ENSG00000066279:ENST00000367409:exon18:c.A5741G:p.Q1914R	rs113325473	Uncertain significance|Likely benign	Primary_Microcephaly,_Recessive|not_specified	RCV000288626.1|RCV000442400.1	MedGen|MedGen	CN239428|CN169374
1	197072752	197072752	C	A	exonic	ASPM	.	nonsynonymous SNV	ASPM:NM_018136:exon18:c.G5629T:p.A1877S	exonic	ENSG00000066279	.	nonsynonymous SNV	ENSG00000066279:ENST00000367409:exon18:c.G5629T:p.A1877S	rs112230218	Benign	not_specified	RCV000145150.1	MedGen	CN169374
1	197072752	197072752	C	T	exonic	ASPM	.	nonsynonymous SNV	ASPM:NM_018136:exon18:c.G5629A:p.A1877T	exonic	ENSG00000066279	.	nonsynonymous SNV	ENSG00000066279:ENST00000367409:exon18:c.G5629A:p.A1877T	rs112230218	other|Uncertain significance	not_specified|Primary_Microcephaly,_Recessive	RCV000145149.2|RCV000322632.1	MedGen|MedGen	CN169374|CN239428
1	197072775	197072775	G	C	exonic	ASPM	.	nonsynonymous SNV	ASPM:NM_018136:exon18:c.C5606G:p.T1869R	exonic	ENSG00000066279	.	nonsynonymous SNV	ENSG00000066279:ENST00000367409:exon18:c.C5606G:p.T1869R	.	Uncertain significance	Primary_Microcephaly,_Recessive	RCV000379628.1	MedGen	CN239428
1	197072799	197072799	T	C	exonic	ASPM	.	nonsynonymous SNV	ASPM:NM_018136:exon18:c.A5582G:p.Y1861C	exonic	ENSG00000066279	.	nonsynonymous SNV	ENSG00000066279:ENST00000367409:exon18:c.A5582G:p.Y1861C	rs587783250	Uncertain significance	Primary_autosomal_recessive_microcephaly_5	RCV000145148.1	MedGen:OMIM	C1837501:608716
1	197072802	197072802	G	A	exonic	ASPM	.	nonsynonymous SNV	ASPM:NM_018136:exon18:c.C5579T:p.A1860V	exonic	ENSG00000066279	.	nonsynonymous SNV	ENSG00000066279:ENST00000367409:exon18:c.C5579T:p.A1860V	rs77138363	Benign|Likely benign	not_specified|Primary_Microcephaly,_Recessive	RCV000145147.2|RCV000282893.1	MedGen|MedGen	CN169374|CN239428
1	197072849	197072849	A	C	exonic	ASPM	.	stopgain	ASPM:NM_018136:exon18:c.T5532G:p.Y1844X	exonic	ENSG00000066279	.	stopgain	ENSG00000066279:ENST00000367409:exon18:c.T5532G:p.Y1844X	rs797045314	Likely pathogenic	Primary_autosomal_recessive_microcephaly_5	RCV000193186.1	MedGen:OMIM	C1837501:608716
1	197072871	197072871	C	T	exonic	ASPM	.	nonsynonymous SNV	ASPM:NM_018136:exon18:c.G5510A:p.G1837D	exonic	ENSG00000066279	.	nonsynonymous SNV	ENSG00000066279:ENST00000367409:exon18:c.G5510A:p.G1837D	rs144969324	Uncertain significance	Primary_autosomal_recessive_microcephaly_5	RCV000145146.1	MedGen:OMIM	C1837501:608716
1	197072910	197072910	T	C	exonic	ASPM	.	nonsynonymous SNV	ASPM:NM_018136:exon18:c.A5471G:p.Q1824R	exonic	ENSG00000066279	.	nonsynonymous SNV	ENSG00000066279:ENST00000367409:exon18:c.A5471G:p.Q1824R	rs62623448	Uncertain significance	not_specified	RCV000359814.1	MedGen	CN169374
1	197072914	197072914	G	A	exonic	ASPM	.	stopgain	ASPM:NM_018136:exon18:c.C5467T:p.Q1823X	exonic	ENSG00000066279	.	stopgain	ENSG00000066279:ENST00000367409:exon18:c.C5467T:p.Q1823X	rs754909135	Pathogenic	Primary_autosomal_recessive_microcephaly_5	RCV000416534.1	MedGen:OMIM	C1837501:608716
1	197072929	197072929	G	A	exonic	ASPM	.	nonsynonymous SNV	ASPM:NM_018136:exon18:c.C5452T:p.R1818C	exonic	ENSG00000066279	.	nonsynonymous SNV	ENSG00000066279:ENST00000367409:exon18:c.C5452T:p.R1818C	rs41299625	Uncertain significance|Uncertain significance|Uncertain significance	Primary_autosomal_recessive_microcephaly_5|not_specified|Primary_Microcephaly,_Recessive	RCV000145145.1|RCV000217148.2|RCV000278925.1	MedGen:OMIM|MedGen|MedGen	C1837501:608716|CN169374|CN239428
1	197073030	197073030	T	C	exonic	ASPM	.	nonsynonymous SNV	ASPM:NM_018136:exon18:c.A5351G:p.Y1784C	exonic	ENSG00000066279	.	nonsynonymous SNV	ENSG00000066279:ENST00000367409:exon18:c.A5351G:p.Y1784C	rs149376906	Uncertain significance	not_specified	RCV000320276.1	MedGen	CN169374
1	197073082	197073082	C	G	exonic	ASPM	.	nonsynonymous SNV	ASPM:NM_018136:exon18:c.G5299C:p.A1767P	exonic	ENSG00000066279	.	nonsynonymous SNV	ENSG00000066279:ENST00000367409:exon18:c.G5299C:p.A1767P	rs142536561	Uncertain significance|Uncertain significance|Uncertain significance	Primary_autosomal_recessive_microcephaly_5|not_specified|Primary_Microcephaly,_Recessive	RCV000145144.1|RCV000175345.1|RCV000336358.1	MedGen:OMIM|MedGen|MedGen	C1837501:608716|CN169374|CN239428
1	197073089	197073089	C	T	exonic	ASPM	.	nonsynonymous SNV	ASPM:NM_018136:exon18:c.G5292A:p.M1764I	exonic	ENSG00000066279	.	nonsynonymous SNV	ENSG00000066279:ENST00000367409:exon18:c.G5292A:p.M1764I	rs587783249	Uncertain significance	Primary_autosomal_recessive_microcephaly_5	RCV000145143.1	MedGen:OMIM	C1837501:608716
1	197073148	197073148	G	A	exonic	ASPM	.	stopgain	ASPM:NM_018136:exon18:c.C5233T:p.R1745X	exonic	ENSG00000066279	.	stopgain	ENSG00000066279:ENST00000367409:exon18:c.C5233T:p.R1745X	rs587783248	Pathogenic	Primary_autosomal_recessive_microcephaly_5	RCV000145142.1	MedGen:OMIM	C1837501:608716
1	197073157	197073157	A	G	exonic	ASPM	.	nonsynonymous SNV	ASPM:NM_018136:exon18:c.T5224C:p.Y1742H	exonic	ENSG00000066279	.	nonsynonymous SNV	ENSG00000066279:ENST00000367409:exon18:c.T5224C:p.Y1742H	rs143733126	Uncertain significance|other	Primary_autosomal_recessive_microcephaly_5|not_specified	RCV000145141.1|RCV000221848.3	MedGen:OMIM|MedGen	C1837501:608716|CN169374
1	197073175	197073175	G	C	exonic	ASPM	.	nonsynonymous SNV	ASPM:NM_018136:exon18:c.C5206G:p.Q1736E	exonic	ENSG00000066279	.	nonsynonymous SNV	ENSG00000066279:ENST00000367409:exon18:c.C5206G:p.Q1736E	rs62623455	Benign	not_specified	RCV000145140.1	MedGen	CN169374
1	197073185	197073185	A	T	exonic	ASPM	.	stopgain	ASPM:NM_018136:exon18:c.T5196A:p.C1732X	exonic	ENSG00000066279	.	stopgain	ENSG00000066279:ENST00000367409:exon18:c.T5196A:p.C1732X	rs587783247	Pathogenic	Primary_autosomal_recessive_microcephaly_5	RCV000145139.1	MedGen:OMIM	C1837501:608716
1	197073196	197073196	G	A	exonic	ASPM	.	nonsynonymous SNV	ASPM:NM_018136:exon18:c.C5185T:p.R1729W	exonic	ENSG00000066279	.	nonsynonymous SNV	ENSG00000066279:ENST00000367409:exon18:c.C5185T:p.R1729W	rs41299623	Benign|Uncertain significance	not_specified|Primary_Microcephaly,_Recessive	RCV000081937.5|RCV000391426.1	MedGen|MedGen	CN169374|CN239428
1	197073243	197073243	C	T	exonic	ASPM	.	nonsynonymous SNV	ASPM:NM_018136:exon18:c.G5138A:p.R1713H	exonic	ENSG00000066279	.	nonsynonymous SNV	ENSG00000066279:ENST00000367409:exon18:c.G5138A:p.R1713H	rs141297873	Uncertain significance	Primary_Microcephaly,_Recessive	RCV000315450.1	MedGen	CN239428
1	197073245	197073245	G	T	exonic	ASPM	.	stopgain	ASPM:NM_018136:exon18:c.C5136A:p.Y1712X	exonic	ENSG00000066279	.	stopgain	ENSG00000066279:ENST00000367409:exon18:c.C5136A:p.Y1712X	rs148294838	Pathogenic	Primary_autosomal_recessive_microcephaly_5	RCV000020780.1	MedGen:OMIM	C1837501:608716
1	197073250	197073250	A	G	exonic	ASPM	.	nonsynonymous SNV	ASPM:NM_018136:exon18:c.T5131C:p.C1711R	exonic	ENSG00000066279	.	nonsynonymous SNV	ENSG00000066279:ENST00000367409:exon18:c.T5131C:p.C1711R	.	Uncertain significance	Primary_Microcephaly,_Recessive	RCV000349368.1	MedGen	CN239428
1	197073283	197073283	G	A	exonic	ASPM	.	nonsynonymous SNV	ASPM:NM_018136:exon18:c.C5098T:p.H1700Y	exonic	ENSG00000066279	.	nonsynonymous SNV	ENSG00000066279:ENST00000367409:exon18:c.C5098T:p.H1700Y	rs749580322	Uncertain significance	Primary_Microcephaly,_Recessive	RCV000391415.1	MedGen	CN239428
1	197073298	197073298	G	A	exonic	ASPM	.	nonsynonymous SNV	ASPM:NM_018136:exon18:c.C5083T:p.R1695C	exonic	ENSG00000066279	.	nonsynonymous SNV	ENSG00000066279:ENST00000367409:exon18:c.C5083T:p.R1695C	rs80238010	Benign|Likely benign	not_specified|Primary_Microcephaly,_Recessive	RCV000145138.2|RCV000309158.1	MedGen|MedGen	CN169374|CN239428
1	197073318	197073318	G	A	exonic	ASPM	.	nonsynonymous SNV	ASPM:NM_018136:exon18:c.C5063T:p.T1688I	exonic	ENSG00000066279	.	nonsynonymous SNV	ENSG00000066279:ENST00000367409:exon18:c.C5063T:p.T1688I	rs62624968	Benign|Likely benign	not_specified|Primary_Microcephaly,_Recessive	RCV000145137.2|RCV000366221.1	MedGen|MedGen	CN169374|CN239428
1	197073430	197073430	T	C	exonic	ASPM	.	nonsynonymous SNV	ASPM:NM_018136:exon18:c.A4951G:p.M1651V	exonic	ENSG00000066279	.	nonsynonymous SNV	ENSG00000066279:ENST00000367409:exon18:c.A4951G:p.M1651V	rs772751994	Likely benign	not_specified	RCV000504490.1	MedGen	CN169374
1	197073514	197073514	T	C	exonic	ASPM	.	nonsynonymous SNV	ASPM:NM_018136:exon18:c.A4867G:p.M1623V	exonic	ENSG00000066279	.	nonsynonymous SNV	ENSG00000066279:ENST00000367409:exon18:c.A4867G:p.M1623V	rs369399401	Uncertain significance	not_specified	RCV000175341.1	MedGen	CN169374
1	197073585	197073585	C	T	exonic	ASPM	.	nonsynonymous SNV	ASPM:NM_018136:exon18:c.G4796A:p.R1599Q	exonic	ENSG00000066279	.	nonsynonymous SNV	ENSG00000066279:ENST00000367409:exon18:c.G4796A:p.R1599Q	rs62623433	Uncertain significance	not_specified	RCV000348526.1	MedGen	CN169374
1	197073586	197073586	G	A	exonic	ASPM	.	stopgain	ASPM:NM_018136:exon18:c.C4795T:p.R1599X	exonic	ENSG00000066279	.	stopgain	ENSG00000066279:ENST00000367409:exon18:c.C4795T:p.R1599X	rs199422165	Pathogenic	Primary_autosomal_recessive_microcephaly_5	RCV000020778.2	MedGen:OMIM	C1837501:608716
1	197073648	197073648	C	T	exonic	ASPM	.	nonsynonymous SNV	ASPM:NM_018136:exon18:c.G4733A:p.R1578Q	exonic	ENSG00000066279	.	nonsynonymous SNV	ENSG00000066279:ENST00000367409:exon18:c.G4733A:p.R1578Q	rs143822761	Uncertain significance|other	Primary_autosomal_recessive_microcephaly_5|not_specified	RCV000145135.1|RCV000274239.2	MedGen:OMIM|MedGen	C1837501:608716|CN169374
1	197073649	197073649	G	A	exonic	ASPM	.	stopgain	ASPM:NM_018136:exon18:c.C4732T:p.R1578X	exonic	ENSG00000066279	.	stopgain	ENSG00000066279:ENST00000367409:exon18:c.C4732T:p.R1578X	rs753406334	Likely pathogenic	not_provided	RCV000220667.2	MedGen	CN221809
1	197073651	197073651	A	T	exonic	ASPM	.	nonsynonymous SNV	ASPM:NM_018136:exon18:c.T4730A:p.V1577D	exonic	ENSG00000066279	.	nonsynonymous SNV	ENSG00000066279:ENST00000367409:exon18:c.T4730A:p.V1577D	.	Uncertain significance	Primary_Microcephaly,_Recessive	RCV000308436.1	MedGen	CN239428
1	197073655	197073655	T	C	exonic	ASPM	.	nonsynonymous SNV	ASPM:NM_018136:exon18:c.A4726G:p.R1576G	exonic	ENSG00000066279	.	nonsynonymous SNV	ENSG00000066279:ENST00000367409:exon18:c.A4726G:p.R1576G	.	Uncertain significance	Primary_Microcephaly,_Recessive	RCV000360810.1	MedGen	CN239428
1	197073819	197073819	T	C	exonic	ASPM	.	nonsynonymous SNV	ASPM:NM_018136:exon18:c.A4562G:p.Y1521C	exonic	ENSG00000066279	.	nonsynonymous SNV	ENSG00000066279:ENST00000367409:exon18:c.A4562G:p.Y1521C	rs768384827	Uncertain significance	not_specified	RCV000499566.1	MedGen	CN169374
1	197073885	197073885	C	A	exonic	ASPM	.	nonsynonymous SNV	ASPM:NM_018136:exon18:c.G4496T:p.R1499L	exonic	ENSG00000066279	.	nonsynonymous SNV	ENSG00000066279:ENST00000367409:exon18:c.G4496T:p.R1499L	rs140119882	Uncertain significance|Uncertain significance	Primary_autosomal_recessive_microcephaly_5|not_specified	RCV000145133.1|RCV000217049.2	MedGen:OMIM|MedGen	C1837501:608716|CN169374
1	197073907	197073907	C	G	exonic	ASPM	.	nonsynonymous SNV	ASPM:NM_018136:exon18:c.G4474C:p.V1492L	exonic	ENSG00000066279	.	nonsynonymous SNV	ENSG00000066279:ENST00000367409:exon18:c.G4474C:p.V1492L	rs587783244	Uncertain significance	Primary_autosomal_recessive_microcephaly_5	RCV000145132.1	MedGen:OMIM	C1837501:608716
1	197073924	197073924	T	C	exonic	ASPM	.	nonsynonymous SNV	ASPM:NM_018136:exon18:c.A4457G:p.Y1486C	exonic	ENSG00000066279	.	nonsynonymous SNV	ENSG00000066279:ENST00000367409:exon18:c.A4457G:p.Y1486C	rs368020945	Uncertain significance	Primary_Microcephaly,_Recessive	RCV000268472.1	MedGen	CN239428
1	197073930	197073930	T	A	exonic	ASPM	.	nonsynonymous SNV	ASPM:NM_018136:exon18:c.A4451T:p.Y1484F	exonic	ENSG00000066279	.	nonsynonymous SNV	ENSG00000066279:ENST00000367409:exon18:c.A4451T:p.Y1484F	.	Uncertain significance	not_specified	RCV000414103.1	MedGen	CN169374
1	197073930	197073930	T	C	exonic	ASPM	.	nonsynonymous SNV	ASPM:NM_018136:exon18:c.A4451G:p.Y1484C	exonic	ENSG00000066279	.	nonsynonymous SNV	ENSG00000066279:ENST00000367409:exon18:c.A4451G:p.Y1484C	.	Uncertain significance	not_specified	RCV000414103.1	MedGen	CN169374
1	197073936	197073936	C	T	exonic	ASPM	.	nonsynonymous SNV	ASPM:NM_018136:exon18:c.G4445A:p.R1482Q	exonic	ENSG00000066279	.	nonsynonymous SNV	ENSG00000066279:ENST00000367409:exon18:c.G4445A:p.R1482Q	rs587783243	Uncertain significance	Primary_autosomal_recessive_microcephaly_5	RCV000145130.1	MedGen:OMIM	C1837501:608716
1	197073945	197073945	T	C	exonic	ASPM	.	nonsynonymous SNV	ASPM:NM_018136:exon18:c.A4436G:p.K1479R	exonic	ENSG00000066279	.	nonsynonymous SNV	ENSG00000066279:ENST00000367409:exon18:c.A4436G:p.K1479R	rs115594989	Uncertain significance	not_specified	RCV000195143.2	MedGen	CN169374
1	197073959	197073959	C	T	exonic	ASPM	.	stopgain	ASPM:NM_018136:exon18:c.G4422A:p.W1474X	exonic	ENSG00000066279	.	stopgain	ENSG00000066279:ENST00000367409:exon18:c.G4422A:p.W1474X	rs147622433	Pathogenic	not_provided	RCV000221876.1	MedGen	CN221809
1	197073964	197073964	A	C	exonic	ASPM	.	nonsynonymous SNV	ASPM:NM_018136:exon18:c.T4417G:p.S1473A	exonic	ENSG00000066279	.	nonsynonymous SNV	ENSG00000066279:ENST00000367409:exon18:c.T4417G:p.S1473A	.	Uncertain significance	not_specified	RCV000407410.1	MedGen	CN169374
1	197073979	197073979	C	T	exonic	ASPM	.	nonsynonymous SNV	ASPM:NM_018136:exon18:c.G4402A:p.A1468T	exonic	ENSG00000066279	.	nonsynonymous SNV	ENSG00000066279:ENST00000367409:exon18:c.G4402A:p.A1468T	rs189918817	Uncertain significance	not_specified	RCV000152804.3	MedGen	CN169374
1	197073994	197073994	T	C	exonic	ASPM	.	nonsynonymous SNV	ASPM:NM_018136:exon18:c.A4387G:p.K1463E	exonic	ENSG00000066279	.	nonsynonymous SNV	ENSG00000066279:ENST00000367409:exon18:c.A4387G:p.K1463E	rs794727211	Uncertain significance	not_specified	RCV000175353.1	MedGen	CN169374
1	197074018	197074018	C	A	exonic	ASPM	.	stopgain	ASPM:NM_018136:exon18:c.G4363T:p.E1455X	exonic	ENSG00000066279	.	stopgain	ENSG00000066279:ENST00000367409:exon18:c.G4363T:p.E1455X	.	Pathogenic|Pathogenic	not_provided|Primary_autosomal_recessive_microcephaly_5	RCV000421420.1|RCV000502418.1	MedGen|MedGen:OMIM	CN221809|C1837501:608716
1	197074072	197074072	G	A	exonic	ASPM	.	nonsynonymous SNV	ASPM:NM_018136:exon18:c.C4309T:p.R1437C	exonic	ENSG00000066279	.	nonsynonymous SNV	ENSG00000066279:ENST00000367409:exon18:c.C4309T:p.R1437C	rs371861473	Uncertain significance	not_specified	RCV000175347.1	MedGen	CN169374
1	197074167	197074167	C	G	exonic	ASPM	.	nonsynonymous SNV	ASPM:NM_018136:exon18:c.G4214C:p.R1405P	exonic	ENSG00000066279	.	nonsynonymous SNV	ENSG00000066279:ENST00000367409:exon18:c.G4214C:p.R1405P	rs143092798	Uncertain significance	Primary_Microcephaly,_Recessive	RCV000378151.1	MedGen	CN239428
1	197074167	197074167	C	T	exonic	ASPM	.	nonsynonymous SNV	ASPM:NM_018136:exon18:c.G4214A:p.R1405H	exonic	ENSG00000066279	.	nonsynonymous SNV	ENSG00000066279:ENST00000367409:exon18:c.G4214A:p.R1405H	rs143092798	Uncertain significance	not_specified	RCV000194113.1	MedGen	CN169374
1	197074168	197074168	G	A	exonic	ASPM	.	nonsynonymous SNV	ASPM:NM_018136:exon18:c.C4213T:p.R1405C	exonic	ENSG00000066279	.	nonsynonymous SNV	ENSG00000066279:ENST00000367409:exon18:c.C4213T:p.R1405C	rs139367209	other|Uncertain significance|Likely benign	not_specified|Primary_Microcephaly,_Recessive|not_provided	RCV000145127.3|RCV000261763.1|RCV000435626.1	MedGen|MedGen|MedGen	CN169374|CN239428|CN221809
1	197074246	197074246	A	G	exonic	ASPM	.	nonsynonymous SNV	ASPM:NM_018136:exon18:c.T4135C:p.S1379P	exonic	ENSG00000066279	.	nonsynonymous SNV	ENSG00000066279:ENST00000367409:exon18:c.T4135C:p.S1379P	rs768625023	Uncertain significance	not_specified	RCV000429716.1	MedGen	CN169374
1	197074307	197074307	C	T	exonic	ASPM	.	stopgain	ASPM:NM_018136:exon18:c.G4074A:p.W1358X	exonic	ENSG00000066279	.	stopgain	ENSG00000066279:ENST00000367409:exon18:c.G4074A:p.W1358X	rs199422162	Pathogenic	Primary_autosomal_recessive_microcephaly_5	RCV000020774.1	MedGen:OMIM	C1837501:608716
1	207940402	207940402	T	C	exonic	CD46	.	nonsynonymous SNV	CD46:NM_002389:exon6:c.T718C:p.S240P,CD46:NM_153826:exon6:c.T718C:p.S240P,CD46:NM_172350:exon6:c.T718C:p.S240P,CD46:NM_172351:exon6:c.T718C:p.S240P,CD46:NM_172352:exon6:c.T718C:p.S240P,CD46:NM_172353:exon6:c.T718C:p.S240P,CD46:NM_172359:exon6:c.T718C:p.S240P,CD46:NM_172361:exon6:c.T718C:p.S240P	exonic	ENSG00000117335	.	nonsynonymous SNV	ENSG00000117335:ENST00000367047:exon5:c.T529C:p.S177P,ENSG00000117335:ENST00000322875:exon6:c.T718C:p.S240P,ENSG00000117335:ENST00000322918:exon6:c.T718C:p.S240P,ENSG00000117335:ENST00000354848:exon6:c.T718C:p.S240P,ENSG00000117335:ENST00000357714:exon6:c.T718C:p.S240P,ENSG00000117335:ENST00000358170:exon6:c.T718C:p.S240P,ENSG00000117335:ENST00000360212:exon6:c.T718C:p.S240P,ENSG00000117335:ENST0…	rs121909589	other	Atypical_hemolytic-uremic_syndrome_2	RCV000018574.2	MedGen:OMIM:Orphanet	C2752040:612922:ORPHA93576
1	207941127	207941127	C	T	exonic	CD46	.	nonsynonymous SNV	CD46:NM_153826:exon7:c.C860T:p.S287L,CD46:NM_172351:exon7:c.C860T:p.S287L,CD46:NM_002389:exon8:c.C905T:p.S302L,CD46:NM_172359:exon8:c.C905T:p.S302L	exonic	ENSG00000117335	.	nonsynonymous SNV	ENSG00000117335:ENST00000354848:exon7:c.C860T:p.S287L,ENSG00000117335:ENST00000367042:exon7:c.C860T:p.S287L,ENSG00000117335:ENST00000367047:exon7:c.C716T:p.S239L,ENSG00000117335:ENST00000441839:exon7:c.C860T:p.S287L,ENSG00000117335:ENST00000480003:exon7:c.C860T:p.S287L,ENSG00000117335:ENST00000322875:exon8:c.C905T:p.S302L,ENSG00000117335:ENST00000358170:exon8:c.C905T:p.S302L,ENSG00000117335:ENST0…	rs751860518	Uncertain significance	Atypical_hemolytic_uremic_syndrome	RCV000348195.1	MedGen:Orphanet	C2931788:ORPHA2134
1	207941154	207941154	C	T	exonic	CD46	.	nonsynonymous SNV	CD46:NM_153826:exon7:c.C887T:p.A296V,CD46:NM_172351:exon7:c.C887T:p.A296V,CD46:NM_002389:exon8:c.C932T:p.A311V,CD46:NM_172359:exon8:c.C932T:p.A311V	exonic	ENSG00000117335	.	nonsynonymous SNV	ENSG00000117335:ENST00000354848:exon7:c.C887T:p.A296V,ENSG00000117335:ENST00000367042:exon7:c.C887T:p.A296V,ENSG00000117335:ENST00000367047:exon7:c.C743T:p.A248V,ENSG00000117335:ENST00000441839:exon7:c.C887T:p.A296V,ENSG00000117335:ENST00000480003:exon7:c.C887T:p.A296V,ENSG00000117335:ENST00000322875:exon8:c.C932T:p.A311V,ENSG00000117335:ENST00000358170:exon8:c.C932T:p.A311V,ENSG00000117335:ENST0…	rs753859532	Uncertain significance	Atypical_hemolytic_uremic_syndrome	RCV000391376.1	MedGen:Orphanet	C2931788:ORPHA2134
22	21350154	21350154	C	T	exonic	LZTR1	.	nonsynonymous SNV	LZTR1:NM_006767:exon17:c.C2062T:p.R688C	exonic	ENSG00000099949	.	nonsynonymous SNV	ENSG00000099949:ENST00000389355:exon16:c.C2005T:p.R669C,ENSG00000099949:ENST00000215739:exon17:c.C2062T:p.R688C	rs587777178	Pathogenic	Schwannomatosis_2	RCV000087294.4	MedGen:OMIM	C3810283:615670
22	21351227	21351227	T	A	exonic	LZTR1	.	nonsynonymous SNV	LZTR1:NM_006767:exon20:c.T2378A:p.L793Q	exonic	ENSG00000099949	.	nonsynonymous SNV	ENSG00000099949:ENST00000389355:exon19:c.T2321A:p.L774Q,ENSG00000099949:ENST00000215739:exon20:c.T2378A:p.L793Q	.	Uncertain significance	not_specified	RCV000413973.1	MedGen	CN169374
22	21351236	21351236	T	C	exonic	LZTR1	.	nonsynonymous SNV	LZTR1:NM_006767:exon20:c.T2387C:p.I796T	exonic	ENSG00000099949	.	nonsynonymous SNV	ENSG00000099949:ENST00000389355:exon19:c.T2330C:p.I777T,ENSG00000099949:ENST00000215739:exon20:c.T2387C:p.I796T	rs141672122	Uncertain significance	not_specified	RCV000481440.1	MedGen	CN169374
14	21899181	21899181	C	T	exonic	CHD8	.	nonsynonymous SNV	CHD8:NM_001170629:exon1:c.G622A:p.G208S	exonic	ENSG00000100888	.	nonsynonymous SNV	ENSG00000100888:ENST00000399982:exon1:c.G622A:p.G208S,ENSG00000100888:ENST00000557364:exon2:c.G622A:p.G208S	rs377359922	Uncertain significance	not_specified	RCV000481186.1	MedGen	CN169374
14	21899462	21899462	G	A	exonic	CHD8	.	nonsynonymous SNV	CHD8:NM_001170629:exon1:c.C341T:p.T114M	exonic	ENSG00000100888	.	nonsynonymous SNV	ENSG00000100888:ENST00000399982:exon1:c.C341T:p.T114M,ENSG00000100888:ENST00000557364:exon2:c.C341T:p.T114M,ENSG00000100888:ENST00000553622:exon4:c.C266T:p.T89M	rs111250264	Uncertain significance	not_specified	RCV000370260.1	MedGen	CN169374
14	21899541	21899541	C	T	exonic	CHD8	.	nonsynonymous SNV	CHD8:NM_001170629:exon1:c.G262A:p.E88K	exonic	ENSG00000100888	.	nonsynonymous SNV	ENSG00000100888:ENST00000399982:exon1:c.G262A:p.E88K,ENSG00000100888:ENST00000557364:exon2:c.G262A:p.E88K,ENSG00000100888:ENST00000553622:exon4:c.G187A:p.E63K	rs78640816	Likely benign	not_specified	RCV000399850.1	MedGen	CN169374
14	21899549	21899549	G	A	exonic	CHD8	.	nonsynonymous SNV	CHD8:NM_001170629:exon1:c.C254T:p.P85L	exonic	ENSG00000100888	.	nonsynonymous SNV	ENSG00000100888:ENST00000399982:exon1:c.C254T:p.P85L,ENSG00000100888:ENST00000557364:exon2:c.C254T:p.P85L,ENSG00000100888:ENST00000553622:exon4:c.C179T:p.P60L	.	Uncertain significance	not_specified	RCV000282695.1	MedGen	CN169374
14	21899622	21899622	A	G	exonic	CHD8	.	nonsynonymous SNV	CHD8:NM_001170629:exon1:c.T181C:p.S61P	exonic	ENSG00000100888	.	nonsynonymous SNV	ENSG00000100888:ENST00000399982:exon1:c.T181C:p.S61P,ENSG00000100888:ENST00000557364:exon2:c.T181C:p.S61P,ENSG00000100888:ENST00000553622:exon4:c.T106C:p.S36P	.	Uncertain significance	not_specified	RCV000484572.1	MedGen	CN169374
14	21899642	21899642	C	A	exonic	CHD8	.	nonsynonymous SNV	CHD8:NM_001170629:exon1:c.G161T:p.G54V	exonic	ENSG00000100888	.	nonsynonymous SNV	ENSG00000100888:ENST00000399982:exon1:c.G161T:p.G54V,ENSG00000100888:ENST00000557364:exon2:c.G161T:p.G54V,ENSG00000100888:ENST00000553622:exon4:c.G86T:p.G29V	.	Likely benign	Autism,_susceptibility_to,_18	RCV000417102.1	MedGen:OMIM	C3554373:615032
2	238287288	238287288	C	A	exonic	COL6A3	.	nonsynonymous SNV	COL6A3:NM_057164:exon4:c.G1267T:p.A423S,COL6A3:NM_057165:exon5:c.G1870T:p.A624S,COL6A3:NM_057167:exon5:c.G1870T:p.A624S,COL6A3:NM_004369:exon6:c.G2488T:p.A830S	exonic	ENSG00000163359	.	nonsynonymous SNV	ENSG00000163359:ENST00000392003:exon4:c.G1267T:p.A423S,ENSG00000163359:ENST00000409809:exon4:c.G1870T:p.A624S,ENSG00000163359:ENST00000347401:exon5:c.G1885T:p.A629S,ENSG00000163359:ENST00000353578:exon5:c.G1870T:p.A624S,ENSG00000163359:ENST00000392004:exon5:c.G1870T:p.A624S,ENSG00000163359:ENST00000295550:exon6:c.G2488T:p.A830S	rs77181645	other|Benign	not_specified|Collagen_VI-related_myopathy	RCV000080921.9|RCV000336823.1	MedGen|MedGen	CN169374|CN117976
2	238287332	238287332	G	T	exonic	COL6A3	.	nonsynonymous SNV	COL6A3:NM_057164:exon4:c.C1223A:p.P408H,COL6A3:NM_057165:exon5:c.C1826A:p.P609H,COL6A3:NM_057167:exon5:c.C1826A:p.P609H,COL6A3:NM_004369:exon6:c.C2444A:p.P815H	exonic	ENSG00000163359	.	nonsynonymous SNV	ENSG00000163359:ENST00000392003:exon4:c.C1223A:p.P408H,ENSG00000163359:ENST00000409809:exon4:c.C1826A:p.P609H,ENSG00000163359:ENST00000347401:exon5:c.C1841A:p.P614H,ENSG00000163359:ENST00000353578:exon5:c.C1826A:p.P609H,ENSG00000163359:ENST00000392004:exon5:c.C1826A:p.P609H,ENSG00000163359:ENST00000295550:exon6:c.C2444A:p.P815H	rs199601240	Uncertain significance	not_specified	RCV000179436.2	MedGen	CN169374
2	238287357	238287357	C	T	exonic	COL6A3	.	nonsynonymous SNV	COL6A3:NM_057164:exon4:c.G1198A:p.A400T,COL6A3:NM_057165:exon5:c.G1801A:p.A601T,COL6A3:NM_057167:exon5:c.G1801A:p.A601T,COL6A3:NM_004369:exon6:c.G2419A:p.A807T	exonic	ENSG00000163359	.	nonsynonymous SNV	ENSG00000163359:ENST00000392003:exon4:c.G1198A:p.A400T,ENSG00000163359:ENST00000409809:exon4:c.G1801A:p.A601T,ENSG00000163359:ENST00000347401:exon5:c.G1816A:p.A606T,ENSG00000163359:ENST00000353578:exon5:c.G1801A:p.A601T,ENSG00000163359:ENST00000392004:exon5:c.G1801A:p.A601T,ENSG00000163359:ENST00000295550:exon6:c.G2419A:p.A807T	rs113155945	other|Benign	not_specified|Collagen_VI-related_myopathy	RCV000080920.9|RCV000297693.1	MedGen|MedGen	CN169374|CN117976
2	238287452	238287452	C	A	exonic	COL6A3	.	nonsynonymous SNV	COL6A3:NM_057164:exon4:c.G1103T:p.C368F,COL6A3:NM_057165:exon5:c.G1706T:p.C569F,COL6A3:NM_057167:exon5:c.G1706T:p.C569F,COL6A3:NM_004369:exon6:c.G2324T:p.C775F	exonic	ENSG00000163359	.	nonsynonymous SNV	ENSG00000163359:ENST00000392003:exon4:c.G1103T:p.C368F,ENSG00000163359:ENST00000409809:exon4:c.G1706T:p.C569F,ENSG00000163359:ENST00000347401:exon5:c.G1721T:p.C574F,ENSG00000163359:ENST00000353578:exon5:c.G1706T:p.C569F,ENSG00000163359:ENST00000392004:exon5:c.G1706T:p.C569F,ENSG00000163359:ENST00000295550:exon6:c.G2324T:p.C775F	.	Uncertain significance	not_specified	RCV000312880.1	MedGen	CN169374
2	238287471	238287471	C	T	exonic	COL6A3	.	nonsynonymous SNV	COL6A3:NM_057164:exon4:c.G1084A:p.A362T,COL6A3:NM_057165:exon5:c.G1687A:p.A563T,COL6A3:NM_057167:exon5:c.G1687A:p.A563T,COL6A3:NM_004369:exon6:c.G2305A:p.A769T	exonic	ENSG00000163359	.	nonsynonymous SNV	ENSG00000163359:ENST00000392003:exon4:c.G1084A:p.A362T,ENSG00000163359:ENST00000409809:exon4:c.G1687A:p.A563T,ENSG00000163359:ENST00000347401:exon5:c.G1702A:p.A568T,ENSG00000163359:ENST00000353578:exon5:c.G1687A:p.A563T,ENSG00000163359:ENST00000392004:exon5:c.G1687A:p.A563T,ENSG00000163359:ENST00000295550:exon6:c.G2305A:p.A769T	rs142719863	Uncertain significance|Likely benign	not_specified|Collagen_VI-related_myopathy	RCV000149959.2|RCV000371027.1	MedGen|MedGen	CN169374|CN117976
2	238287473	238287473	C	T	exonic	COL6A3	.	nonsynonymous SNV	COL6A3:NM_057164:exon4:c.G1082A:p.R361H,COL6A3:NM_057165:exon5:c.G1685A:p.R562H,COL6A3:NM_057167:exon5:c.G1685A:p.R562H,COL6A3:NM_004369:exon6:c.G2303A:p.R768H	exonic	ENSG00000163359	.	nonsynonymous SNV	ENSG00000163359:ENST00000392003:exon4:c.G1082A:p.R361H,ENSG00000163359:ENST00000409809:exon4:c.G1685A:p.R562H,ENSG00000163359:ENST00000347401:exon5:c.G1700A:p.R567H,ENSG00000163359:ENST00000353578:exon5:c.G1685A:p.R562H,ENSG00000163359:ENST00000392004:exon5:c.G1685A:p.R562H,ENSG00000163359:ENST00000295550:exon6:c.G2303A:p.R768H	rs575412915	Uncertain significance	not_specified	RCV000378139.1	MedGen	CN169374
2	238287474	238287474	G	C	exonic	COL6A3	.	nonsynonymous SNV	COL6A3:NM_057164:exon4:c.C1081G:p.R361G,COL6A3:NM_057165:exon5:c.C1684G:p.R562G,COL6A3:NM_057167:exon5:c.C1684G:p.R562G,COL6A3:NM_004369:exon6:c.C2302G:p.R768G	exonic	ENSG00000163359	.	nonsynonymous SNV	ENSG00000163359:ENST00000392003:exon4:c.C1081G:p.R361G,ENSG00000163359:ENST00000409809:exon4:c.C1684G:p.R562G,ENSG00000163359:ENST00000347401:exon5:c.C1699G:p.R567G,ENSG00000163359:ENST00000353578:exon5:c.C1684G:p.R562G,ENSG00000163359:ENST00000392004:exon5:c.C1684G:p.R562G,ENSG00000163359:ENST00000295550:exon6:c.C2302G:p.R768G	rs200722892	Likely pathogenic	not_provided	RCV000171340.1	MedGen	CN221809
2	238287515	238287515	T	C	exonic	COL6A3	.	nonsynonymous SNV	COL6A3:NM_057164:exon4:c.A1040G:p.Q347R,COL6A3:NM_057165:exon5:c.A1643G:p.Q548R,COL6A3:NM_057167:exon5:c.A1643G:p.Q548R,COL6A3:NM_004369:exon6:c.A2261G:p.Q754R	exonic	ENSG00000163359	.	nonsynonymous SNV	ENSG00000163359:ENST00000392003:exon4:c.A1040G:p.Q347R,ENSG00000163359:ENST00000409809:exon4:c.A1643G:p.Q548R,ENSG00000163359:ENST00000347401:exon5:c.A1658G:p.Q553R,ENSG00000163359:ENST00000353578:exon5:c.A1643G:p.Q548R,ENSG00000163359:ENST00000392004:exon5:c.A1643G:p.Q548R,ENSG00000163359:ENST00000295550:exon6:c.A2261G:p.Q754R	rs762752112	Uncertain significance	not_specified	RCV000382434.1	MedGen	CN169374
2	238287545	238287545	G	A	exonic	COL6A3	.	nonsynonymous SNV	COL6A3:NM_057164:exon4:c.C1010T:p.P337L,COL6A3:NM_057165:exon5:c.C1613T:p.P538L,COL6A3:NM_057167:exon5:c.C1613T:p.P538L,COL6A3:NM_004369:exon6:c.C2231T:p.P744L	exonic	ENSG00000163359	.	nonsynonymous SNV	ENSG00000163359:ENST00000392003:exon4:c.C1010T:p.P337L,ENSG00000163359:ENST00000409809:exon4:c.C1613T:p.P538L,ENSG00000163359:ENST00000347401:exon5:c.C1628T:p.P543L,ENSG00000163359:ENST00000353578:exon5:c.C1613T:p.P538L,ENSG00000163359:ENST00000392004:exon5:c.C1613T:p.P538L,ENSG00000163359:ENST00000295550:exon6:c.C2231T:p.P744L	rs199504304	Uncertain significance|Likely benign	not_specified|Collagen_VI-related_myopathy	RCV000330608.1|RCV000367426.1	MedGen|MedGen	CN169374|CN117976
2	238287557	238287557	C	T	exonic	COL6A3	.	nonsynonymous SNV	COL6A3:NM_057164:exon4:c.G998A:p.R333H,COL6A3:NM_057165:exon5:c.G1601A:p.R534H,COL6A3:NM_057167:exon5:c.G1601A:p.R534H,COL6A3:NM_004369:exon6:c.G2219A:p.R740H	exonic	ENSG00000163359	.	nonsynonymous SNV	ENSG00000163359:ENST00000392003:exon4:c.G998A:p.R333H,ENSG00000163359:ENST00000409809:exon4:c.G1601A:p.R534H,ENSG00000163359:ENST00000347401:exon5:c.G1616A:p.R539H,ENSG00000163359:ENST00000353578:exon5:c.G1601A:p.R534H,ENSG00000163359:ENST00000392004:exon5:c.G1601A:p.R534H,ENSG00000163359:ENST00000295550:exon6:c.G2219A:p.R740H	rs529827991	Uncertain significance	not_specified	RCV000406679.1	MedGen	CN169374
2	238287558	238287558	G	A	exonic	COL6A3	.	nonsynonymous SNV	COL6A3:NM_057164:exon4:c.C997T:p.R333C,COL6A3:NM_057165:exon5:c.C1600T:p.R534C,COL6A3:NM_057167:exon5:c.C1600T:p.R534C,COL6A3:NM_004369:exon6:c.C2218T:p.R740C	exonic	ENSG00000163359	.	nonsynonymous SNV	ENSG00000163359:ENST00000392003:exon4:c.C997T:p.R333C,ENSG00000163359:ENST00000409809:exon4:c.C1600T:p.R534C,ENSG00000163359:ENST00000347401:exon5:c.C1615T:p.R539C,ENSG00000163359:ENST00000353578:exon5:c.C1600T:p.R534C,ENSG00000163359:ENST00000392004:exon5:c.C1600T:p.R534C,ENSG00000163359:ENST00000295550:exon6:c.C2218T:p.R740C	rs147182340	Uncertain significance	not_specified	RCV000234678.2	MedGen	CN169374
2	238287587	238287587	T	C	exonic	COL6A3	.	nonsynonymous SNV	COL6A3:NM_057164:exon4:c.A968G:p.H323R,COL6A3:NM_057165:exon5:c.A1571G:p.H524R,COL6A3:NM_057167:exon5:c.A1571G:p.H524R,COL6A3:NM_004369:exon6:c.A2189G:p.H730R	exonic	ENSG00000163359	.	nonsynonymous SNV	ENSG00000163359:ENST00000392003:exon4:c.A968G:p.H323R,ENSG00000163359:ENST00000409809:exon4:c.A1571G:p.H524R,ENSG00000163359:ENST00000347401:exon5:c.A1586G:p.H529R,ENSG00000163359:ENST00000353578:exon5:c.A1571G:p.H524R,ENSG00000163359:ENST00000392004:exon5:c.A1571G:p.H524R,ENSG00000163359:ENST00000295550:exon6:c.A2189G:p.H730R	rs760976593	Uncertain significance	Collagen_VI-related_myopathy	RCV000327990.1	MedGen	CN117976
2	238287596	238287596	T	G	exonic	COL6A3	.	nonsynonymous SNV	COL6A3:NM_057164:exon4:c.A959C:p.Y320S,COL6A3:NM_057165:exon5:c.A1562C:p.Y521S,COL6A3:NM_057167:exon5:c.A1562C:p.Y521S,COL6A3:NM_004369:exon6:c.A2180C:p.Y727S	exonic	ENSG00000163359	.	nonsynonymous SNV	ENSG00000163359:ENST00000392003:exon4:c.A959C:p.Y320S,ENSG00000163359:ENST00000409809:exon4:c.A1562C:p.Y521S,ENSG00000163359:ENST00000347401:exon5:c.A1577C:p.Y526S,ENSG00000163359:ENST00000353578:exon5:c.A1562C:p.Y521S,ENSG00000163359:ENST00000392004:exon5:c.A1562C:p.Y521S,ENSG00000163359:ENST00000295550:exon6:c.A2180C:p.Y727S	.	Uncertain significance	not_specified	RCV000286708.1	MedGen	CN169374
2	238287629	238287629	C	T	exonic	COL6A3	.	nonsynonymous SNV	COL6A3:NM_057164:exon4:c.G926A:p.G309D,COL6A3:NM_057165:exon5:c.G1529A:p.G510D,COL6A3:NM_057167:exon5:c.G1529A:p.G510D,COL6A3:NM_004369:exon6:c.G2147A:p.G716D	exonic	ENSG00000163359	.	nonsynonymous SNV	ENSG00000163359:ENST00000392003:exon4:c.G926A:p.G309D,ENSG00000163359:ENST00000409809:exon4:c.G1529A:p.G510D,ENSG00000163359:ENST00000347401:exon5:c.G1544A:p.G515D,ENSG00000163359:ENST00000353578:exon5:c.G1529A:p.G510D,ENSG00000163359:ENST00000392004:exon5:c.G1529A:p.G510D,ENSG00000163359:ENST00000295550:exon6:c.G2147A:p.G716D	rs144514259	Likely benign|Likely benign	not_specified|Collagen_VI-related_myopathy	RCV000291815.1|RCV000363927.1	MedGen|MedGen	CN169374|CN117976
2	238287746	238287746	C	A	exonic	COL6A3	.	nonsynonymous SNV	COL6A3:NM_057164:exon4:c.G809T:p.R270L,COL6A3:NM_057165:exon5:c.G1412T:p.R471L,COL6A3:NM_057167:exon5:c.G1412T:p.R471L,COL6A3:NM_004369:exon6:c.G2030T:p.R677L	exonic	ENSG00000163359	.	nonsynonymous SNV	ENSG00000163359:ENST00000392003:exon4:c.G809T:p.R270L,ENSG00000163359:ENST00000409809:exon4:c.G1412T:p.R471L,ENSG00000163359:ENST00000347401:exon5:c.G1427T:p.R476L,ENSG00000163359:ENST00000353578:exon5:c.G1412T:p.R471L,ENSG00000163359:ENST00000392004:exon5:c.G1412T:p.R471L,ENSG00000163359:ENST00000295550:exon6:c.G2030T:p.R677L	rs35227432	Uncertain significance	not_specified	RCV000267051.1	MedGen	CN169374
2	238287746	238287746	C	T	exonic	COL6A3	.	nonsynonymous SNV	COL6A3:NM_057164:exon4:c.G809A:p.R270H,COL6A3:NM_057165:exon5:c.G1412A:p.R471H,COL6A3:NM_057167:exon5:c.G1412A:p.R471H,COL6A3:NM_004369:exon6:c.G2030A:p.R677H	exonic	ENSG00000163359	.	nonsynonymous SNV	ENSG00000163359:ENST00000392003:exon4:c.G809A:p.R270H,ENSG00000163359:ENST00000409809:exon4:c.G1412A:p.R471H,ENSG00000163359:ENST00000347401:exon5:c.G1427A:p.R476H,ENSG00000163359:ENST00000353578:exon5:c.G1412A:p.R471H,ENSG00000163359:ENST00000392004:exon5:c.G1412A:p.R471H,ENSG00000163359:ENST00000295550:exon6:c.G2030A:p.R677H	rs35227432	other|Likely benign	not_specified|Collagen_VI-related_myopathy	RCV000179435.2|RCV000267921.1	MedGen|MedGen	CN169374|CN117976
2	238287749	238287749	A	C	exonic	COL6A3	.	nonsynonymous SNV	COL6A3:NM_057164:exon4:c.T806G:p.I269S,COL6A3:NM_057165:exon5:c.T1409G:p.I470S,COL6A3:NM_057167:exon5:c.T1409G:p.I470S,COL6A3:NM_004369:exon6:c.T2027G:p.I676S	exonic	ENSG00000163359	.	nonsynonymous SNV	ENSG00000163359:ENST00000392003:exon4:c.T806G:p.I269S,ENSG00000163359:ENST00000409809:exon4:c.T1409G:p.I470S,ENSG00000163359:ENST00000347401:exon5:c.T1424G:p.I475S,ENSG00000163359:ENST00000353578:exon5:c.T1409G:p.I470S,ENSG00000163359:ENST00000392004:exon5:c.T1409G:p.I470S,ENSG00000163359:ENST00000295550:exon6:c.T2027G:p.I676S	rs771749492	Uncertain significance	Collagen_VI-related_myopathy	RCV000323033.1	MedGen	CN117976
2	238287780	238287780	C	T	exonic	COL6A3	.	nonsynonymous SNV	COL6A3:NM_057164:exon4:c.G775A:p.V259I,COL6A3:NM_057165:exon5:c.G1378A:p.V460I,COL6A3:NM_057167:exon5:c.G1378A:p.V460I,COL6A3:NM_004369:exon6:c.G1996A:p.V666I	exonic	ENSG00000163359	.	nonsynonymous SNV	ENSG00000163359:ENST00000392003:exon4:c.G775A:p.V259I,ENSG00000163359:ENST00000409809:exon4:c.G1378A:p.V460I,ENSG00000163359:ENST00000347401:exon5:c.G1393A:p.V465I,ENSG00000163359:ENST00000353578:exon5:c.G1378A:p.V460I,ENSG00000163359:ENST00000392004:exon5:c.G1378A:p.V460I,ENSG00000163359:ENST00000295550:exon6:c.G1996A:p.V666I	rs111584250	Uncertain significance	Collagen_VI-related_myopathy	RCV000377726.1	MedGen	CN117976
2	238287797	238287797	T	G	exonic	COL6A3	.	nonsynonymous SNV	COL6A3:NM_057164:exon4:c.A758C:p.D253A,COL6A3:NM_057165:exon5:c.A1361C:p.D454A,COL6A3:NM_057167:exon5:c.A1361C:p.D454A,COL6A3:NM_004369:exon6:c.A1979C:p.D660A	exonic	ENSG00000163359	.	nonsynonymous SNV	ENSG00000163359:ENST00000392003:exon4:c.A758C:p.D253A,ENSG00000163359:ENST00000409809:exon4:c.A1361C:p.D454A,ENSG00000163359:ENST00000347401:exon5:c.A1376C:p.D459A,ENSG00000163359:ENST00000353578:exon5:c.A1361C:p.D454A,ENSG00000163359:ENST00000392004:exon5:c.A1361C:p.D454A,ENSG00000163359:ENST00000295550:exon6:c.A1979C:p.D660A	.	Uncertain significance	not_specified	RCV000484386.1	MedGen	CN169374
2	238287800	238287800	C	T	exonic	COL6A3	.	nonsynonymous SNV	COL6A3:NM_057164:exon4:c.G755A:p.R252H,COL6A3:NM_057165:exon5:c.G1358A:p.R453H,COL6A3:NM_057167:exon5:c.G1358A:p.R453H,COL6A3:NM_004369:exon6:c.G1976A:p.R659H	exonic	ENSG00000163359	.	nonsynonymous SNV	ENSG00000163359:ENST00000392003:exon4:c.G755A:p.R252H,ENSG00000163359:ENST00000409809:exon4:c.G1358A:p.R453H,ENSG00000163359:ENST00000347401:exon5:c.G1373A:p.R458H,ENSG00000163359:ENST00000353578:exon5:c.G1358A:p.R453H,ENSG00000163359:ENST00000392004:exon5:c.G1358A:p.R453H,ENSG00000163359:ENST00000295550:exon6:c.G1976A:p.R659H	rs36092870	other|Likely benign	not_specified|Collagen_VI-related_myopathy	RCV000080919.9|RCV000283036.1	MedGen|MedGen	CN169374|CN117976
2	238287801	238287801	G	A	exonic	COL6A3	.	nonsynonymous SNV	COL6A3:NM_057164:exon4:c.C754T:p.R252C,COL6A3:NM_057165:exon5:c.C1357T:p.R453C,COL6A3:NM_057167:exon5:c.C1357T:p.R453C,COL6A3:NM_004369:exon6:c.C1975T:p.R659C	exonic	ENSG00000163359	.	nonsynonymous SNV	ENSG00000163359:ENST00000392003:exon4:c.C754T:p.R252C,ENSG00000163359:ENST00000409809:exon4:c.C1357T:p.R453C,ENSG00000163359:ENST00000347401:exon5:c.C1372T:p.R458C,ENSG00000163359:ENST00000353578:exon5:c.C1357T:p.R453C,ENSG00000163359:ENST00000392004:exon5:c.C1357T:p.R453C,ENSG00000163359:ENST00000295550:exon6:c.C1975T:p.R659C	rs146291186	Uncertain significance|Likely benign	not_specified|Collagen_VI-related_myopathy	RCV000305159.1|RCV000319603.1	MedGen|MedGen	CN169374|CN117976
2	238287815	238287815	T	C	exonic	COL6A3	.	nonsynonymous SNV	COL6A3:NM_057164:exon4:c.A740G:p.N247S,COL6A3:NM_057165:exon5:c.A1343G:p.N448S,COL6A3:NM_057167:exon5:c.A1343G:p.N448S,COL6A3:NM_004369:exon6:c.A1961G:p.N654S	exonic	ENSG00000163359	.	nonsynonymous SNV	ENSG00000163359:ENST00000392003:exon4:c.A740G:p.N247S,ENSG00000163359:ENST00000409809:exon4:c.A1343G:p.N448S,ENSG00000163359:ENST00000347401:exon5:c.A1358G:p.N453S,ENSG00000163359:ENST00000353578:exon5:c.A1343G:p.N448S,ENSG00000163359:ENST00000392004:exon5:c.A1343G:p.N448S,ENSG00000163359:ENST00000295550:exon6:c.A1961G:p.N654S	rs144501019	Uncertain significance	not_specified	RCV000281298.1	MedGen	CN169374
2	238287828	238287828	C	T	exonic	COL6A3	.	nonsynonymous SNV	COL6A3:NM_057164:exon4:c.G727A:p.V243I,COL6A3:NM_057165:exon5:c.G1330A:p.V444I,COL6A3:NM_057167:exon5:c.G1330A:p.V444I,COL6A3:NM_004369:exon6:c.G1948A:p.V650I	exonic	ENSG00000163359	.	nonsynonymous SNV	ENSG00000163359:ENST00000392003:exon4:c.G727A:p.V243I,ENSG00000163359:ENST00000409809:exon4:c.G1330A:p.V444I,ENSG00000163359:ENST00000347401:exon5:c.G1345A:p.V449I,ENSG00000163359:ENST00000353578:exon5:c.G1330A:p.V444I,ENSG00000163359:ENST00000392004:exon5:c.G1330A:p.V444I,ENSG00000163359:ENST00000295550:exon6:c.G1948A:p.V650I	rs149187225	Uncertain significance	not_specified	RCV000179433.1	MedGen	CN169374
2	238287837	238287837	A	T	exonic	COL6A3	.	nonsynonymous SNV	COL6A3:NM_057164:exon4:c.T718A:p.S240T,COL6A3:NM_057165:exon5:c.T1321A:p.S441T,COL6A3:NM_057167:exon5:c.T1321A:p.S441T,COL6A3:NM_004369:exon6:c.T1939A:p.S647T	exonic	ENSG00000163359	.	nonsynonymous SNV	ENSG00000163359:ENST00000392003:exon4:c.T718A:p.S240T,ENSG00000163359:ENST00000409809:exon4:c.T1321A:p.S441T,ENSG00000163359:ENST00000347401:exon5:c.T1336A:p.S446T,ENSG00000163359:ENST00000353578:exon5:c.T1321A:p.S441T,ENSG00000163359:ENST00000392004:exon5:c.T1321A:p.S441T,ENSG00000163359:ENST00000295550:exon6:c.T1939A:p.S647T	rs777409908	Uncertain significance	not_specified	RCV000284694.1	MedGen	CN169374
2	238289588	238289588	G	A	exonic;exonic	COL6A3	.	nonsynonymous SNV;nonsynonymous SNV	COL6A3:NM_057164:exon3:c.C646T:p.P216S,COL6A3:NM_057166:exon3:c.C646T:p.P216S,COL6A3:NM_057165:exon4:c.C1249T:p.P417S,COL6A3:NM_057167:exon4:c.C1249T:p.P417S,COL6A3:NM_004369:exon5:c.C1867T:p.P623S;COL6A3:NM_057164:exon3:c.C646T:p.P216S,COL6A3:NM_057166:exon3:c.C646T:p.P216S,COL6A3:NM_057165:exon4:c.C1249T:p.P417S,COL6A3:NM_057167:exon4:c.C1249T:p.P417S,COL6A3:NM_004369:exon5:c.C1867T:p.P623S	exonic;exonic	ENSG00000163359	.	nonsynonymous SNV;nonsynonymous SNV	ENSG00000163359:ENST00000392003:exon3:c.C646T:p.P216S,ENSG00000163359:ENST00000409809:exon3:c.C1249T:p.P417S,ENSG00000163359:ENST00000472056:exon3:c.C646T:p.P216S,ENSG00000163359:ENST00000347401:exon4:c.C1264T:p.P422S,ENSG00000163359:ENST00000353578:exon4:c.C1249T:p.P417S,ENSG00000163359:ENST00000392004:exon4:c.C1249T:p.P417S,ENSG00000163359:ENST00000295550:exon5:c.C1867T:p.P623S,ENSG00000163359:…	rs372022185	Uncertain significance	not_specified	RCV000413959.1	MedGen	CN169374
2	238289609	238289609	T	C	exonic;exonic	COL6A3	.	nonsynonymous SNV;nonsynonymous SNV	COL6A3:NM_057164:exon3:c.A625G:p.M209V,COL6A3:NM_057166:exon3:c.A625G:p.M209V,COL6A3:NM_057165:exon4:c.A1228G:p.M410V,COL6A3:NM_057167:exon4:c.A1228G:p.M410V,COL6A3:NM_004369:exon5:c.A1846G:p.M616V;COL6A3:NM_057164:exon3:c.A625G:p.M209V,COL6A3:NM_057166:exon3:c.A625G:p.M209V,COL6A3:NM_057165:exon4:c.A1228G:p.M410V,COL6A3:NM_057167:exon4:c.A1228G:p.M410V,COL6A3:NM_004369:exon5:c.A1846G:p.M616V	exonic;exonic	ENSG00000163359	.	nonsynonymous SNV;nonsynonymous SNV	ENSG00000163359:ENST00000392003:exon3:c.A625G:p.M209V,ENSG00000163359:ENST00000409809:exon3:c.A1228G:p.M410V,ENSG00000163359:ENST00000472056:exon3:c.A625G:p.M209V,ENSG00000163359:ENST00000347401:exon4:c.A1243G:p.M415V,ENSG00000163359:ENST00000353578:exon4:c.A1228G:p.M410V,ENSG00000163359:ENST00000392004:exon4:c.A1228G:p.M410V,ENSG00000163359:ENST00000295550:exon5:c.A1846G:p.M616V,ENSG00000163359:…	.	Uncertain significance	not_specified	RCV000318756.1	MedGen	CN169374
2	238289669	238289669	C	A	exonic;exonic	COL6A3	.	nonsynonymous SNV;nonsynonymous SNV	COL6A3:NM_057164:exon3:c.G565T:p.A189S,COL6A3:NM_057166:exon3:c.G565T:p.A189S,COL6A3:NM_057165:exon4:c.G1168T:p.A390S,COL6A3:NM_057167:exon4:c.G1168T:p.A390S,COL6A3:NM_004369:exon5:c.G1786T:p.A596S;COL6A3:NM_057164:exon3:c.G565T:p.A189S,COL6A3:NM_057166:exon3:c.G565T:p.A189S,COL6A3:NM_057165:exon4:c.G1168T:p.A390S,COL6A3:NM_057167:exon4:c.G1168T:p.A390S,COL6A3:NM_004369:exon5:c.G1786T:p.A596S	exonic;exonic	ENSG00000163359	.	nonsynonymous SNV;nonsynonymous SNV	ENSG00000163359:ENST00000392003:exon3:c.G565T:p.A189S,ENSG00000163359:ENST00000409809:exon3:c.G1168T:p.A390S,ENSG00000163359:ENST00000472056:exon3:c.G565T:p.A189S,ENSG00000163359:ENST00000347401:exon4:c.G1183T:p.A395S,ENSG00000163359:ENST00000353578:exon4:c.G1168T:p.A390S,ENSG00000163359:ENST00000392004:exon4:c.G1168T:p.A390S,ENSG00000163359:ENST00000295550:exon5:c.G1786T:p.A596S,ENSG00000163359:…	rs34934127	other|Benign|Likely benign	not_specified|not_provided|Collagen_VI-related_myopathy	RCV000080917.9|RCV000224262.1|RCV000334755.1	MedGen|MedGen|MedGen	CN169374|CN221809|CN117976
2	238289693	238289693	C	T	exonic;exonic	COL6A3	.	nonsynonymous SNV;nonsynonymous SNV	COL6A3:NM_057164:exon3:c.G541A:p.D181N,COL6A3:NM_057166:exon3:c.G541A:p.D181N,COL6A3:NM_057165:exon4:c.G1144A:p.D382N,COL6A3:NM_057167:exon4:c.G1144A:p.D382N,COL6A3:NM_004369:exon5:c.G1762A:p.D588N;COL6A3:NM_057164:exon3:c.G541A:p.D181N,COL6A3:NM_057166:exon3:c.G541A:p.D181N,COL6A3:NM_057165:exon4:c.G1144A:p.D382N,COL6A3:NM_057167:exon4:c.G1144A:p.D382N,COL6A3:NM_004369:exon5:c.G1762A:p.D588N	exonic;exonic	ENSG00000163359	.	nonsynonymous SNV;nonsynonymous SNV	ENSG00000163359:ENST00000392003:exon3:c.G541A:p.D181N,ENSG00000163359:ENST00000409809:exon3:c.G1144A:p.D382N,ENSG00000163359:ENST00000472056:exon3:c.G541A:p.D181N,ENSG00000163359:ENST00000347401:exon4:c.G1159A:p.D387N,ENSG00000163359:ENST00000353578:exon4:c.G1144A:p.D382N,ENSG00000163359:ENST00000392004:exon4:c.G1144A:p.D382N,ENSG00000163359:ENST00000295550:exon5:c.G1762A:p.D588N,ENSG00000163359:…	.	Uncertain significance	not_specified	RCV000343076.1	MedGen	CN169374
2	238289767	238289767	T	C	exonic;exonic	COL6A3	.	nonsynonymous SNV;nonsynonymous SNV	COL6A3:NM_057164:exon3:c.A467G:p.D156G,COL6A3:NM_057166:exon3:c.A467G:p.D156G,COL6A3:NM_057165:exon4:c.A1070G:p.D357G,COL6A3:NM_057167:exon4:c.A1070G:p.D357G,COL6A3:NM_004369:exon5:c.A1688G:p.D563G;COL6A3:NM_057164:exon3:c.A467G:p.D156G,COL6A3:NM_057166:exon3:c.A467G:p.D156G,COL6A3:NM_057165:exon4:c.A1070G:p.D357G,COL6A3:NM_057167:exon4:c.A1070G:p.D357G,COL6A3:NM_004369:exon5:c.A1688G:p.D563G	exonic;exonic	ENSG00000163359	.	nonsynonymous SNV;nonsynonymous SNV	ENSG00000163359:ENST00000392003:exon3:c.A467G:p.D156G,ENSG00000163359:ENST00000409809:exon3:c.A1070G:p.D357G,ENSG00000163359:ENST00000472056:exon3:c.A467G:p.D156G,ENSG00000163359:ENST00000347401:exon4:c.A1085G:p.D362G,ENSG00000163359:ENST00000353578:exon4:c.A1070G:p.D357G,ENSG00000163359:ENST00000392004:exon4:c.A1070G:p.D357G,ENSG00000163359:ENST00000295550:exon5:c.A1688G:p.D563G,ENSG00000163359:…	rs112913396	Likely benign|Likely benign	not_specified|Collagen_VI-related_myopathy	RCV000080915.6|RCV000349518.1	MedGen|MedGen	CN169374|CN117976
[truncated: 725 more rows]

[truncated: 3 more sheets: Table S11- RBPs in quiescence, Table S12 - eCLIP data, Table S13 - RBP KD RNAseq]
